# Supplementary material for: Multi-omics characterization of esophageal squamous cell carcinoma identifies molecular subtypes and therapeutic targets
Source: JCI Insight. 2024 Apr 23;9(10):e171916. doi: 10.1172/jci.insight.171916 (PMC11141925; doi:10.1172/jci.insight.171916)
Supplement: Supplemental table 1 [file jciinsight-9-171916-s073.xlsx]

## Sheet: Description
Table S1. Clinical information of 60 patients in our cohort.
Description
1.Clinical information of 60 patients in our cohort.

## Sheet: Clinical informarion
Patient NO.	Sample ID	Surgical site	Sex	Age	Pathomorphological	Tumor location	Tumour grade	T stage	N stage	pTNM stage	Details of lymph node involvement	Basic Disease	Family history	Tumor size	Smoke	Alcohol	Data of surgery
1	15EC0035	esophagus	Male	70	Medullary type	Middle	Moderately differentiated	4a	2	Ⅲc	Metastasis	Yes	No	6×3×2cm	Yes	No	2013-12-09
2	15EC0037	esophagus	Male	57	Ulcerative type	Upper	Well differentiated	3	1	Ⅲa	Metastasis	No	Yes	3×2×0.5cm	Yes	No	2013-12-11
3	15EC0039	esophagus	Male	62	Medullary type	Middle	Moderately differentiated	4a	1	Ⅲc	Metastasis	No	No	5×4×2cm	Yes	No	2013-12-11
4	15EC0042	esophagus	Male	64	Medullary type	Middle	Moderately differentiated	4a	2	Ⅲc	Metastasis	No	No	5×3×2cm	Yes	Yes	2013-12-13
5	15EC0043	esophagus	Male	66	Medullary type	Lower	Moderately differentiated	4a	1	Ⅲc	Metastasis	Yes	No	14×5×3cm	Yes	No	2013-12-12
6	15EC0046	esophagus	Female	66	Fungating type	Lower	Well differentiated	3	0	Ⅱa	Non metastasis	Yes	No	2×2×1cm	No	No	2013-12-16
7	15EC0048	esophagus	Male	61	Constritive type	Upper	Well differentiated	4a	1	Ⅲc	Metastasis	No	No	4×2×4cm	Yes	Yes	2013-12-17
8	15EC0051	esophagus	Male	50	Medullary type	Upper	Well differentiated	3	1	Ⅲa	Metastasis	No	Yes	5×3×1cm	Yes	No	2013-12-18
9	15EC0054	esophagus	Male	54	Medullary type	Middle	Well differentiated	3	0	Ⅱa	Non metastasis	No	No	5×2×4cm	Yes	No	2013-12-19
10	15EC0057	esophagus	Male	56	Medullary type	Middle	Moderately differentiated	4a	1	Ⅲc	Metastasis	No	Yes	4×3×2cm	No	Yes	2013-12-23
11	15EC0059	esophagus	Female	61	Medullary type	Middle	Moderately differentiated	3	0	Ⅱb	Non metastasis	No	No	8×4×3cm	No	No	2013-12-24
12	15EC0068	esophagus	Male	70	Medullary type	Middle	Moderately differentiated	4a	0	Ⅲa	Non metastasis	Yes	No	5×3×2cm	Yes	Yes	2013-12-30
13	15EC0074	esophagus	Male	62	Ulcerative type	Upper	Moderately differentiated	4b	0	Ⅲc	Non metastasis	No	No	5×4×1cm	Yes	No	2014-01-07
14	15EC0075	esophagus	Female	56	Fungating type	Middle	Well differentiated	3	0	Ⅱa	Non metastasis	Yes	No	3×3×1cm	No	No	2014-01-07
15	15EC0083	esophagus	Male	63	Medullary type	Middle	Moderately differentiated	3	0	Ⅱb	Non metastasis	No	No	4×3×3cm	Yes	No	2014-01-17
16	15EC0086	esophagus	Male	62	Medullary type	Middle	Moderately differentiated	3	0	Ⅱb	Non metastasis	Yes	No	6×4×3cm	Yes	No	2014-02-06
17	15EC0087	esophagus	Male	67	Ulcerative type	Middle	Poorly differentiated	4b	0	Ⅲc	Non metastasis	No	No	7×4×3cm	Yes	Yes	2014-02-07
18	15EC0088	esophagus	Female	55	Ulcerative type	Middle	Moderately differentiated	3	2	Ⅲb	Metastasis	No	Yes	5×4×1.5cm	No	No	2014-02-07
19	15EC0091	esophagus	Male	69	Fungating type	Middle	Well differentiated	4a	0	Ⅲa	Non metastasis	No	No	10×5×2cm	Yes	No	2014-02-07
20	15EC0092	esophagus	Male	71	Medullary type	Middle	Moderately differentiated	4a	1	Ⅲc	Metastasis	No	No	6×4×2cm	Yes	No	2014-02-08
21	15EC0098	esophagus	Male	75	Medullary type	Middle	Moderately differentiated	3	0	Ⅱb	Non metastasis	Yes	No	4×1×3cm	No	No	2014-02-25
22	15EC0102	esophagus	Male	72	Medullary type	Lower	Well differentiated	4a	1	Ⅲc	Metastasis	No	No	4×3×1cm	No	No	2014-02-12
23	15EC0107	esophagus	Female	71	Medullary type	Middle	Moderately differentiated	3	2	Ⅲb	Metastasis	No	No	4×4×2cm	No	No	2014-02-19
24	15EC0108	esophagus	Male	56	Medullary type	Middle	Well differentiated	3	0	Ⅱa	Non metastasis	No	No	4×3×1cm	No	No	2014-02-21
25	15EC0111	esophagus	Female	51	Medullary type	Upper	Moderately differentiated	4b	1	Ⅲc	Metastasis	No	No	7×4×3cm	No	No	2014-02-21
26	15EC0112	esophagus	Female	68	Medullary type	Middle	Well differentiated	3	1	Ⅲa	Metastasis	Yes	No	4×3×1cm	No	No	2014-02-24
27	15EC0158	esophagus	Female	62	Medullary type	Middle	Moderately differentiated	2	0	Ⅱb	Non metastasis	Yes	No	3×2×1cm	No	No	2014-04-08
28	15EC0243	esophagus	Male	61	Fungating type	Upper	Moderately differentiated	3	0	Ⅱb	Non metastasis	No	Yes	4×3×3cm	No	Yes	2014-07-18
29	15EC0247	esophagus	Female	67	Medullary type	Middle	Moderately differentiated	3	0	Ⅱa	Non metastasis	No	Yes	5×4×3cm	No	No	2014-07-22
30	15EC0114	esophagus	Male	68	Medullary type	Lower	Moderately differentiated	4a	0	Ⅲa	Non metastasis	Yes	No	7×5×3cm	Yes	No	2014-02-24
31	15EC0116	esophagus	Male	53	Medullary type	Middle	Moderately differentiated	3	0	Ⅱb	Non metastasis	No	No	3×3×1cm	Yes	Yes	2014-02-25
32	15EC0157	esophagus	Female	78	Medullary type	Middle	Moderately differentiated	3	0	Ⅱa	Non metastasis	Yes	No	6×4×2cm	No	No	2014-04-08
33	15EC0159	esophagus	Male	46	Fungating type	Middle	Well differentiated	4b	1	Ⅲc	Metastasis	No	No	5×2×4cm	Yes	Yes	2014-04-10
34	15EC0165	esophagus	Male	70	Fungating type	Middle	Moderately differentiated	4a	0	Ⅲa	Non metastasis	No	No	4×3×1cm	Yes	Yes	2014-04-17
35	15EC0167	esophagus	Female	69	Ulcerative type	Middle	Moderately differentiated	3	1	Ⅲa	Metastasis	Yes	Yes	6×3×1cm	No	No	2014-04-17
36	15EC0171	esophagus	Female	66	Medullary type	Upper	Moderately differentiated	3	0	Ⅱb	Non metastasis	Yes	No	4×3×2cm	No	No	2014-04-21
37	15EC0172	esophagus	Male	64	Medullary type	Lower	Moderately differentiated	3	2	Ⅲb	Metastasis	Yes	No	9×5×2cm	Yes	No	2014-04-21
38	15EC0176	esophagus	Male	60	Fungating type	Upper	Moderately differentiated	3	0	Ⅱb	Non metastasis	No	No	5×2×3cm	Yes	No	2014-04-25
39	15EC0177	esophagus	Male	66	Medullary type	Middle	Moderately differentiated	3	0	Ⅱb	Non metastasis	No	No	5×3×2cm	Yes	No	2014-04-25
40	15EC0181	esophagus	Male	62	Medullary type	Middle	Moderately differentiated	2	2	Ⅲa	Metastasis	No	Yes	4×3×0.5cm	No	No	2014-05-07
41	15EC0186	esophagus	Female	62	Ulcerative type	Middle	Poorly differentiated	4a	2	Ⅲc	Metastasis	No	Yes	6×5×1.5cm	No	No	2014-05-09
42	15EC0188	esophagus	Female	68	Medullary type	Upper	Moderately differentiated	4a	0	Ⅲa	Non metastasis	Yes	No	5×4×2cm	No	No	2014-05-13
43	15EC0189	esophagus	Male	58	Medullary type	Middle	Moderately differentiated	2	0	Ⅱa	Non metastasis	No	No	4×3×0.5cm	No	Yes	2014-05-14
44	15EC0191	esophagus	Female	57	Fungating type	Upper	Well differentiated	4a	1	Ⅲc	Metastasis	No	No	7×3×2cm	No	No	2014-05-19
45	15EC0192	esophagus	Female	64	Medullary type	Middle	Moderately differentiated	4a	0	Ⅲa	Non metastasis	No	No	7×5×3cm	No	No	2014-05-19
46	15EC0227	esophagus	Male	59	Ulcerative type	Upper	Moderately differentiated	3	0	Ⅱb	Non metastasis	No	No	4×1×3cm	Yes	Yes	2014-07-01
47	15EC0228	esophagus	Male	57	Medullary type	Lower	Well differentiated	4b	1	Ⅲc	Metastasis	Yes	Yes	4×3×1cm	Yes	Yes	2014-07-02
48	15EC0230	esophagus	Female	51	Medullary type	Lower	Moderately differentiated	2	1	Ⅱb	Metastasis	No	No	4×3×1cm	No	No	2014-07-03
49	15EC0233	esophagus	Female	51	Fungating type	Middle	Well differentiated	3	0	Ⅱa	Non metastasis	No	No	3×2×1cm	No	No	2014-07-04
50	15EC0234	esophagus	Male	63	Ulcerative type	Upper	Well differentiated	4b	0	Ⅲc	Non metastasis	Yes	No	6×4×3cm	Yes	No	2014-07-04
51	15EC0239	esophagus	Male	60	Fungating type	Middle	Moderately differentiated	4b	0	Ⅲc	Non metastasis	No	No	7×2×4cm	No	No	2014-07-08
52	15EC0240	esophagus	Female	58	Fungating type	Middle	Moderately differentiated	4a	0	Ⅲa	Non metastasis	No	No	7×4×2cm	No	No	2014-07-18
53	15EC0251	esophagus	Female	67	Medullary type	Middle	Moderately differentiated	3	2	Ⅲb	Metastasis	No	No	5×4×3cm	No	No	2014-07-24
54	15EC0254	esophagus	Male	67	Medullary type	Lower	Moderately differentiated	3	0	Ⅱb	Non metastasis	No	No	9×5×2cm	No	No	2014-07-28
55	15EC0255	esophagus	Male	58	Medullary type	Upper	Moderately differentiated	3	1	Ⅲa	Metastasis	No	Yes	6×2×4cm	Yes	No	2014-07-30
56	15EC0256	esophagus	Male	49	Medullary type	Middle	Moderately differentiated	4a	0	Ⅲa	Non metastasis	Yes	Yes	5×3×2cm	Yes	Yes	2014-07-30
57	15EC0261	esophagus	Male	62	Medullary type	Middle	Well differentiated	3	0	Ⅱa	Non metastasis	No	Yes	4×3×1cm	Yes	No	2014-08-01
58	15EC0262	esophagus	Male	48	Ulcerative type	Upper	Moderately differentiated	4a	0	Ⅲa	Non metastasis	Yes	Yes	7×5×3cm	Yes	Yes	2014-08-01
59	15EC0276	esophagus	Male	52	Medullary type	Middle	Moderately differentiated	3	1	Ⅲa	Metastasis	No	No	3×2×1cm	No	No	2014-08-13
60	15EC0282	esophagus	Male	61	Fungating type	Middle	Well differentiated	4a	0	Ⅲa	Non metastasis	Yes	No	5×3×3cm	Yes	No	2014-09-01
