# Supplementary material for: Multi-omics characterization of esophageal squamous cell carcinoma identifies molecular subtypes and therapeutic targets
Source: JCI Insight. 2024 Apr 23;9(10):e171916. doi: 10.1172/jci.insight.171916 (PMC11141925; doi:10.1172/jci.insight.171916)
Supplement: Supplemental table 2 [file jciinsight-9-171916-s074.xlsx]

## Sheet: Description
Table S2. Quantitative information of RNA-seq, proteomics, and phosphoproteomics.
Description
1.Quantitative information of RNA-seq.
2.Quantitative information of proteomics.
3.Quantitative information of phosphoproteomics.
4.Upregulated proteins in tumor tissues compared with nontumor tissues.
5.Downregulated proteins in tumor tissues compared with nontumor tissues.
6.Upregulated phosphoproteins in tumor tissues compared with nontumor tissues.
7.Downregulated phosphoproteins in tumor tissues compared with nontumor tissues.
8.Estimate analysis of RNA-seq data.

## Sheet: RNA seq
Gene ID	Gene name	S035P	S035T	S037P	S037T	S039P	S039T	S042P	S042T	S043P	S043T	S046P	S046T	S048P	S048T	S051P	S051T	S054P	S054T	S057P	S057T	S059P	S059T	S068P	S068T	S074P	S074T	S075P	S075T	S083P	S083T	S086P	S086T	S087P	S087T	S088P	S088T	S091P	S091T	S092P	S092T	S098P	S098T	S102P	S102T	S107P	S107T	S108P	S108T
2323	FLT3LG	36.95	31.2	27.32	20.12	22.19	28.66	21.62	19.59	33.06	17.18	30.06	21.09	25.27	20.5	24.96	15.07	25.94	27.83	36.5	40.94	23.86	27.63	35.29	32.77	41.23	18.84	27.22	18.2	14.88	26.35	71.31	28.46	30.08	31.1	20.29	17.05	18.88	13.47	26.49	30.32	19.59	34.77	28.57	16.87	32.88	16.28	30.37	18.63
90459	ERI1	14.13	30.22	10.95	17.39	11.92	32.33	11.76	17.73	34.69	41.31	18.01	21.69	18.89	18.43	12.32	19.91	16.38	16.98	13.37	20.17	22.09	16.58	14.36	16.91	14.62	21.07	15.92	22.42	10.36	17.59	22.24	18.05	14.27	21.05	20.68	13.08	14.45	16.35	15.89	19.18	15.59	22.81	12.21	22.56	15.85	16.8	18.81	24.04
79595	SAP130	28.36	39.91	25.79	29.82	23.94	31.32	19.75	45.44	40.7	47.16	23.51	30.19	21.86	24.09	26.16	24.98	31.36	33.26	19.83	29.39	32.29	33.88	30.49	29.08	27.45	34.48	21.98	46.45	22.45	20.4	37.74	42.16	20.92	48.14	26.5	28.62	24.57	24.64	21.07	25.21	28.2	21.79	23.69	19.26	16.83	35.46	24.39	24.99
100129098	LOC100129098	0	0	0.17	0	0.32	0	1.99	0.17	0	0.53	0.61	0.49	1.67	0	0.23	0.67	0.78	0.9	1.39	0.54	0.23	0.52	0.24	0.8	0.74	0	0.74	0	0	0.51	0	0	0.61	0	0.6	0.26	0.79	0.23	0.36	1.56	0.25	0.37	0	0	0.36	0	0.26	0
10927	SPIN1	57.03	45.9	43.43	60.23	45.23	69.23	68.26	77.67	57.34	64.65	38.12	76.13	70.31	57.51	51.15	53.74	41.96	38.48	81.47	69.21	32.27	59.36	84.5	44.19	89.9	52.47	85.05	40.82	32.66	83.85	22.71	169.92	74.95	79.01	47.2	60.51	39.72	43.77	91.04	66.42	51.21	75.53	39.52	50.71	57.12	28.93	69.6	44.75
7475	WNT6	2.9	6.01	2.61	3.87	2.97	3.49	1.02	0.97	1.43	0.25	5.15	2.09	1.01	1.43	2.93	1.25	4.37	2.53	3.17	3.04	2.58	3.64	2.71	3.02	6.51	3.56	5.23	2.67	4.16	2.85	0.37	0.72	4.6	48.31	2.82	3.29	1.12	2.55	1.26	1.1	3.54	2.06	1.04	1.12	2.29	0	4.39	1.4
8879	SGPL1	42.26	67.6	47.86	55.34	49.42	90.43	23.17	145.5	66.46	95.27	57.91	46.05	30.89	59.72	46.48	53.88	49.76	65.36	23.13	53.49	49.05	56.46	27.32	44.77	25.24	72.1	27.72	55.19	59.46	30.73	50.28	59.83	37.72	99.17	48.97	75.92	57.75	41.66	24.8	30.5	34.21	30.95	62	52.84	29.38	50.02	35.01	48.9
51450	PRRX2	30.88	16	17.78	60.24	13.18	75.92	20.06	91.36	29.58	44.1	25.8	25.48	28.46	87.28	23.74	64.94	15.99	21.47	12.66	28.31	72.97	55.85	7.2	43.18	16.49	39.45	15.3	20.98	4.42	11.64	5.62	17.3	18.75	44.02	11.62	20.91	12.85	49.95	12.08	22.84	24.89	17.13	5.87	16.13	67.49	29.46	20.38	53.74
390940	PINLYP	6.7	19.67	17.34	9.46	6.54	12.85	10.52	5.37	6.38	8.08	11.8	8.85	15.57	12.85	9.3	1.8	9.26	13.07	8.53	16.14	6.15	4.21	13.98	8.39	13.53	7.16	6.64	12.23	7.04	11.32	4.19	6.12	7.3	17.62	7.16	4.91	7.89	11.12	8.79	10.44	4.5	6.55	5.81	7.12	4.04	1.35	4.65	3.56
1211	CLTA	123.18	243.13	120.65	81.43	108.49	118.6	83.06	120.54	102.34	115.72	113.36	127.01	90.67	135.6	114.19	114.91	74.74	111.07	96.81	145.31	74.29	164.78	76.56	91.19	100.22	116.03	92.14	96.59	114.27	91.8	68.64	190.18	94.29	85.96	98.31	114.13	89.81	134.2	102.61	74.09	66.32	127.98	110.02	158.42	125.97	184.61	95.85	112.26
51399	TRAPPC4	13.82	21.3	11.82	12.29	13.99	17.68	17.63	23.85	18.88	18.59	15.39	18.22	15.89	13.93	17.49	14.83	13.51	15.69	25.68	23.14	16.06	19.41	13.15	12.33	24.71	20.07	22.9	24.43	12.7	20.29	22.24	14.92	17.38	18.1	13.34	12.24	10.95	12.22	22.36	13.28	21.58	20.02	10.01	16.85	18.17	14.1	16.94	15.97
102723623	LOC102723623	6.84	6.39	4.15	8.67	5.69	7.1	5.84	3.42	5.22	7.06	12.89	15.52	8.82	6.15	11.82	9.8	10.89	6.83	4.08	4.63	14.25	5.26	7.17	12.57	2.93	21.62	10.01	13.05	12.3	7.32	15.82	6.85	6.33	11.33	13.78	8.65	10.59	11.96	5.43	6.16	16.54	5.64	8.48	2.96	8.5	12.48	12.13	7.89
57470	LRRC47	41.59	50.35	38.34	46.25	37.9	40.66	48.25	54.95	40.55	44.55	63.88	52	41.55	56.02	48.81	37.1	55.68	50.45	60.44	45.7	67.73	49.49	56.97	38.15	46.4	58.42	51.2	76.3	38.8	50.5	43.38	86.64	40.59	51.8	37.96	48.73	44.51	47.33	56.49	54.86	55.14	49.57	41.97	35.83	40.25	61.67	55.7	47.09
91966	EOLA1	10.82	18.3	12.7	17.32	12.53	10.95	15.17	24.88	15.95	14.01	20.81	23.77	28.28	13.12	19.36	16.84	14.84	18.56	15.47	17	14.38	24.49	19.06	23.22	17.32	15.8	23.66	19.51	15.2	16.67	27.29	19.77	13.07	18.66	17.24	13.51	16.02	14.72	20.52	14.83	23.24	17.95	18.12	15.92	14.62	16.18	13.75	15.49
8200	GDF5	6.86	7.25	5.17	11.66	3.36	5.3	5.6	4.24	7.05	6.9	11.36	6.88	11.15	7.34	7.92	15.03	13.05	12.48	4.57	5.09	17.32	12.24	11.94	12.08	5.08	15.18	6.8	14.08	11	12.9	13.88	5.7	4.85	18.65	14.08	9.7	6.94	15.82	4.6	8.95	12.31	4.98	10.57	5.27	8.83	11.79	14.96	10.41
8470	SORBS2	135.63	11.29	95.1	37.24	69.29	16.47	158.3	12.77	41.74	6.66	42.04	85.84	118.65	3.93	83.12	6.42	45.92	14.98	255.61	67.09	12.45	69.95	150.24	32.42	225.1	2.41	213.6	4.09	35.31	206.35	3.33	5.14	217.51	11.7	55.04	3.54	59.01	2.98	149.84	134.24	208.99	127	53.66	2.05	134.27	1.15	138.63	12.33
79848	CSPP1	13.35	22.64	9.89	11.9	10.74	17.93	9.31	27.03	14.63	11.63	14.06	15.98	13.71	19.09	13.5	8.99	18.88	16.77	10.04	11.73	21.19	20.77	14.01	18.14	10.73	20.06	13.67	23.48	11.4	13.5	16.35	22.18	12.93	20.18	25.05	9.73	18.87	20.54	10.4	17.49	18.95	10.98	14.56	11.99	11.23	65.92	14.88	19.86
5533	PPP3CC	24.98	27.16	25.27	22.84	24.63	26.17	26.43	13.57	36.87	15.54	22.03	29.85	30.26	9.82	33.01	26.55	27.68	28.14	23.33	35.38	37.14	29.51	26.14	48.5	34.59	12.95	32.01	42.61	21.79	28.1	57.77	12.81	30.21	14.49	36.69	11.97	30.93	9.03	28.03	36.49	30.45	29.92	21.44	17.4	31.46	16.76	31.08	18.16
54926	UBE2R2	57	103.15	54.64	58.93	46.74	48.38	63.55	47.3	48.32	49.34	42.15	72.06	53.53	51.09	54.62	64.46	49.11	53.62	78.84	69.4	51.07	68.12	62.32	48.84	75.98	48.87	52.48	34.36	48.74	56.52	50.76	65.07	54.82	51.62	51.48	41.29	51.9	47.67	61.81	60.53	46.81	60.38	48.66	47.03	41.99	55.68	65.31	39.84
11181	TREH	5.06	1.67	2.59	2.86	3.08	3.54	3.92	2.32	1.28	1.11	1.83	6.47	8.21	1.98	6.05	6.22	3.97	4.06	3.29	3.46	1.03	3.96	8.9	20.74	4.2	2.4	12.4	1.28	4.63	5.03	2.11	0	4.6	4.74	3.88	1.17	7.86	2.24	2.74	4.12	10.29	6.11	4.5	1.44	3.92	1.6	7.51	0.9
51429	SNX9	84.7	35.71	117.56	77.94	89.94	70.36	106.38	85.66	59.62	41.11	52.85	97.03	113.64	41.01	109.75	70.73	56.39	52.68	109.25	108.19	43.32	58.08	81.53	100.18	116.02	42.04	106.07	20.65	80.11	117.56	48.93	41.51	110.5	55.68	97.94	50.79	95.79	27.16	112.84	108.95	74.89	135.97	68.39	38.89	101.47	45.58	117.96	41.08
10288	LILRB2	7.32	9.21	7.47	24.72	8.84	26.11	12.98	9.27	20.06	6.54	9.87	24.45	30.78	7.43	13.88	10.89	17.92	31.73	16.28	60.41	10.06	16.52	12.67	30.33	21.91	6.76	14.17	6.77	4.84	11.36	15.21	9.57	8.52	4.07	8.39	8.34	9.44	2.67	10	28.86	18.65	36.05	7.66	17.95	33.8	4.07	18.68	10.12
944	TNFSF8	4.36	7.39	8.22	4.62	4.54	4.5	3.28	3.49	18.75	2.25	4.16	5.86	7.73	1.78	1.75	1.52	11.83	8.34	1.96	11.43	8.52	8.25	2.74	21.85	7.13	1.81	3.91	2.89	3.02	3.49	32.91	2.51	3.4	0.99	3.2	0.83	3.14	0.51	3.44	4.5	2.85	6.88	1.75	1.8	9.72	1.83	6.11	1.93
10293	TRAIP	2.45	8.14	1.86	2.92	3.32	4.57	1.17	4.09	10.37	13.11	6.17	3.24	0.33	9.06	1.78	5.06	2.35	7.67	1.92	4.1	5.07	3.23	1.33	2.22	1.76	7.71	0.84	9.03	3.81	3.17	6.23	12.53	1.22	11.27	6.08	8.52	4.09	8.89	3.19	1.24	2.1	0.25	4.07	6.16	3.25	21.52	0.36	6.61
1810	DR1	30.99	33.46	27.19	30.24	28.71	40.85	26.35	52.75	32.49	29.55	37.84	34.87	28.06	54.64	33.08	41.37	52.65	43.97	26.47	33.08	32	34.2	28.9	33.2	26.38	44.43	34.22	52.94	31.08	31.83	50.05	26.1	28.41	35.29	31.69	38.45	28.55	33.08	27.36	27.13	34.75	29.85	27.44	38.08	26.54	58.09	34.29	32.3
91156	IGFN1	0.3	0.23	0.18	1.13	0.35	0.55	1.26	0.09	0.87	0.46	0.09	0.27	0.38	0.18	0.37	5.52	0.55	0.12	0.56	0.68	1.44	0.83	0.52	1.58	1.39	1.28	0.4	0.38	0.11	0.41	0.28	0	0.45	0.42	0.43	0.14	0.28	9.71	0.73	1.27	0.4	0.04	0.39	1.92	0.87	1.09	0.21	7.26
166	TLE5	455.21	397.75	452.67	409.63	461.55	308.29	793.9	391.32	342.42	344.7	438.16	603.28	546.89	289.82	505.7	281.36	364.09	289.74	1065.3	599.49	294.11	450.4	736.93	246.45	821.15	223.35	678.64	235.71	359.63	754.81	385.47	341.42	563.53	211.59	491.61	184.22	336.12	252.23	848.83	620.87	565.51	773.66	338.78	168.74	354.31	174.11	540.97	273.45
26049	FAM169A	2.21	2.21	1.7	2.79	1.05	5.37	0.56	5.62	3.48	2.45	1.26	2.3	0.74	1.69	1.76	1.67	3.8	3.63	2.15	3.15	2.22	1.67	2.04	2.15	1.36	4.99	2.21	0.8	1.67	2.16	5.36	1.84	0.87	10.87	1.5	4	1.41	1.46	2.08	1.61	2.86	1.24	1.64	2.9	1.51	7.85	1.68	2.15
11197	WIF1	8.22	0	3.7	0	0.2	0	0	0.21	0.99	0.43	0.74	3.92	0.88	1.44	5.64	0	3.16	0	0	4.62	0	0	0	0	0.9	0	5.14	0	0	0.31	0	1.67	3.98	30.12	0.24	0	0	0	0	0.32	2.76	0	0	0.49	13.68	12.99	0	0.49
10683	DLL3	0	1.28	0	0	0.2	0	0	0.41	0.24	0.21	0	0.3	0.29	0.35	0	0.27	0	0.81	0.21	1.95	0.83	0.31	0	0.65	0.22	0	0.25	2.28	0	0	0	0.62	0	0.95	0	2.81	0	0.27	0	0	0.3	0	0	0	0	2.34	0	0.24
284996	RNF149	78.54	120.94	86.54	103.92	85.6	89.98	46.75	93.84	105.38	102.46	96.02	89.1	97.51	69.25	88.52	110.88	132.21	131.37	59.1	85.76	134.53	122.54	55.51	143.85	59.73	143.23	66.73	111.59	105.13	65.11	106.65	83.87	77.91	85	135.2	196.42	138.39	111.95	51.09	86.95	94.1	77	86.58	101.22	106.73	127.77	75.05	118.72
282679	AQP11	5.18	6.56	3.55	2.51	2.45	3.91	2.27	2.26	4.27	3.34	3.32	5.86	1.42	13.67	5.4	2.93	5.45	1.78	1.85	2.43	3.82	8.5	4.12	2.12	3.05	3.5	3.91	4.06	3.63	5.67	9.57	3.29	2.15	2.08	2.22	0.61	1.74	0.8	1.8	0.92	2.68	2.78	2.43	2.98	2.96	4.4	2.4	5.67
84987	COX14	39.49	59.83	45.58	48.02	48.32	44.71	87.19	61.28	48.33	54.33	51.6	56.88	67.45	48.44	58.73	36.08	30.78	39.09	62.06	72.67	14.13	53.06	81.48	33.48	74.98	17.25	68.24	73.78	35.78	91.76	43.34	68.82	41.11	17.68	38.98	60.69	34.44	17.11	98.24	78.81	47.49	87.06	38.4	22.69	48.91	53.5	73.09	48.49
23520	ANP32C	0	0.91	0	0	0	1.57	0	0	0.87	0.72	0	1.92	0.94	4.99	0	1.86	0.93	0	0	0	0	0	0	0	0	0	0	0.8	0	0	0	0	0	1.01	0	3.38	0	11.08	0	0	0	0.75	0	0	0	3.82	0	0
285782	CAGE1	4.23	5.48	3.66	4.76	3.25	4.74	2.01	2.85	7.19	6.19	5.92	4.92	4.27	5.49	3.45	7.77	10.54	5.94	2.08	3.02	5.66	7.38	5.74	8.21	3.27	5.93	6.76	5.67	4.65	4.49	8.48	3.97	3.91	7.9	4.2	5.99	5.08	7.64	3.02	5.79	5.66	3.54	4.58	1.81	3.41	9.35	5.73	4.69
56935	SMCO4	16.2	21.98	19.91	22.57	16.17	29.45	22.54	21.98	21.27	20.58	18.84	15.82	20.91	19.51	17.28	19.68	23.12	21.62	17.9	28.07	13.57	21.63	18.65	19.79	30.57	12.63	18.85	15.72	14.73	22.87	25.34	11.13	16.66	14.04	12.71	10.86	12.33	7.72	22.62	14.83	19.08	22.06	19.1	10.67	22.04	12.71	17.69	14.15
157807	CLVS1	0.9	1.23	0.49	0.87	1.79	0.43	0.62	3.07	0.35	0.51	1.79	0.68	0.33	0.81	1.2	0.46	0.71	0.93	0.48	0.5	1.06	3.06	0.33	1.24	1.27	0.35	1.02	0.33	1.49	1.05	1.65	0.35	0.98	0.9	1.98	0.6	1.27	0	0.62	1.07	0.87	0.53	1.4	0.55	0.75	4.09	0.72	0.82
7066	THPO	0.48	0.3	0.24	1.63	0.23	2.36	1.21	0.73	0	1.5	0.95	2.2	1.36	0.45	0.66	0.49	0	0.86	1.48	1.29	0.65	0.74	0	1.15	1.66	0.38	1.06	0.3	0	1.12	0.35	0	1.19	0.37	1.07	0	1.06	0	1.02	2.59	1.61	1.3	0.26	0	0.93	0.33	3.34	0.57
1311	COMP	8.98	4.6	4.95	6.83	2.86	7.28	1.06	17.63	9.12	5.32	3.18	3.63	8.66	11.75	2.04	12.19	3.04	8.58	2.04	6.01	0.45	10.36	0.71	452.39	0.36	3.64	0.73	1.16	2.31	0.25	1.78	0.17	3.39	11.31	2.35	1.52	3.62	5.75	0.7	25.65	1.72	3.04	2.17	0	7.97	1.49	2.54	1.17
100505767	SPDYE18	10.47	10.14	7.6	6.74	6.54	3.42	6.83	10.19	7.91	8.71	12.09	8.15	3.8	0.84	6.87	13.78	20.71	10.88	6.36	3.93	7.8	9.39	5.63	3.37	0.6	2.61	3.01	25.81	14.05	4.53	9.79	9.86	3.01	15.58	5.47	0	8.06	6.55	2.14	0.08	6.71	2.43	5.07	3.52	6.91	7.75	13.72	9.57
1030	CDKN2B	18.85	8.58	44.76	16.49	37.2	45.81	4.91	4.3	2.72	2.99	42.42	21.45	7.01	74.82	15.96	7.98	5.39	6.41	4.88	4.75	9.59	5.74	4.23	6.86	4.68	3.81	5.08	61.91	36.51	7.7	6	31.13	14.02	4.63	43.56	78.57	42.13	82.49	5.19	6.2	5.56	4.07	44.62	2.69	6.27	117.92	7.72	23.93
8545	CGGBP1	47.23	52.44	35.63	32.64	31.44	34.55	41.05	33.26	38.9	26.89	28.78	41.53	39.28	30.47	45.74	26.33	38.24	35.94	41.66	53.59	38.79	54.37	31.58	44.12	53.72	18.22	42.49	29.78	27.06	46.35	57.83	24.12	46.06	43.38	36.83	22.47	29.67	20.72	47.14	32.8	33.67	46.51	32.06	32.95	43.04	39.89	37.02	27.5
10575	CCT4	71.35	96.13	78.77	84.17	86.63	114.18	78.79	151.34	281.23	481.66	93.14	79.52	64.81	174.39	69.6	79.49	83.46	73.89	100.02	122.93	99.53	112.14	63.12	47.65	84.98	115.3	83.35	174.43	77.12	84.34	120.21	170.27	98.99	206.03	102.69	170.21	60.69	144.84	96.07	70.81	57.51	92.86	67.09	121.95	68.74	149.17	62.8	129.95
10663	CXCR6	11.48	25.69	12.48	10.47	12.08	6.84	5.27	10.55	12.99	3.19	12.44	9.54	7.24	7.46	7.78	5.33	16.36	19.78	5.55	17.9	12.68	15.05	7	13.82	7.97	5.54	8.32	11.98	12.83	11	23.44	15.61	6.53	9.32	7.95	10.18	13.41	4.16	5	6.78	11.32	7.39	10.07	7.8	6.77	17.75	12.26	6.11
85378	TUBGCP6	33.38	40.32	33.81	43.65	32.71	49.13	27.67	32.18	45.27	37.78	34.61	39.07	32.92	28.74	34.15	35.04	45.12	41.91	31.52	32.45	59.76	43.81	40.88	56.38	29.04	72.34	38.82	35.47	35.71	38.89	71.56	32.64	32.77	63.14	39.14	26.18	49.75	65.48	31.37	37.63	71.82	27.96	62.33	30.64	46.67	88.48	46.34	41.76
374	AREG	14.12	6.36	25.1	16.79	23.86	27.9	122.16	2.72	33.36	69.63	20.15	17.68	37.51	29.86	16.05	26.05	35.96	24.54	27.88	23.64	29.12	14.87	20.52	52.15	9.17	15.83	21.63	5.17	16.81	3.52	6.18	30.9	56.27	4.69	37.76	118.01	23.06	23.33	17.74	35.02	11.47	21.43	40.98	48.17	46.68	93.07	26.31	39.95
51816	ADA2	33.03	78.31	49.4	30.76	24.35	55.63	29.03	38.17	73.1	29.71	40.65	68.47	62.83	39.9	48.23	36.82	99.72	96.98	27.92	109.59	57.04	66	50.7	114.15	44.24	40.18	43.15	61.19	32.79	30.18	161.09	36.29	31.29	28.11	31.1	35.93	25	24.76	24.42	28.84	42.55	54.47	35.21	34.66	42.23	34.7	44.04	24.2
84687	PPP1R9B	64.43	95.55	79.16	89.37	69.58	151.12	58.29	73.36	95.52	87.31	74.68	73.94	63.12	112.02	57.84	99.91	86.71	106.92	58.78	133.98	109.82	75.58	47.13	118.45	69.02	110.26	54.7	54.48	58.41	51.64	158	59.07	45.98	86.66	51.36	100.33	55.35	68.84	55.34	67.72	69.01	79.91	53.95	106.1	75.53	35.08	66.09	63.39
9951	HS3ST4	0.27	8.43	0.25	5.41	1.42	0	0	0	0.44	0	1.19	0.72	0	0	0.51	0	1.89	0.16	0.25	1.85	0	0	0	0	0	0	0	0	2.3	0	0	0	0.45	0.77	1.76	0	2.7	0	0	0.76	0.55	0	0.81	0	0.13	0	0	1.46
79830	ZMYM1	27.57	36.02	21.77	31.23	21.55	35.44	18.15	28.04	35.3	30.37	35.95	39.73	29.87	26.11	29.82	31.85	42.47	35.64	20.06	21.8	45.53	46.46	29.47	43.05	22.02	49.45	35.36	39.1	32.64	36.14	46.14	65.58	24.57	37.59	30.55	30.04	40.66	35.89	20.84	24.4	35.35	23.35	32	25.12	22.76	51.62	38.31	31.83
6871	TADA2A	45.22	47.99	39.74	52.28	30.42	50.78	34.58	42.23	46.45	46.17	57.37	67.52	56.65	34.71	56.88	53.99	63.92	50.74	40.41	39.76	60.22	66.67	62.6	59.31	37.94	85.57	63.37	63.95	49.33	73.41	74.29	41.33	49.25	68.66	49.91	35.91	62.13	62.22	40.06	54.85	73.2	44.31	44.22	32.41	45.37	74.89	69.6	42.52
142	PARP1	48.09	93.57	55.92	75.07	51.26	62.74	68.81	131.85	105.09	89.89	65.64	72.72	49.7	93.29	54.64	56.32	107.68	88.8	77.85	99.93	71.9	73.13	57.71	60.5	77.45	70.19	65.82	105.38	43.26	71.38	141.45	127.42	62.64	122.64	49.15	42.12	36.2	87.56	66.56	75.95	57.32	67.03	35.42	62.64	45.27	96.5	71.12	63.95
2629	GBA	43.37	57.53	42.44	56.29	30.87	75	35.94	72.09	69.68	65.59	58.15	40.27	38.1	59.83	39.23	58.85	33.51	72.31	34.59	63.99	47.03	53.21	32.93	44.78	45.9	49.49	34.2	41.69	49.75	34.09	43.87	67.95	35.17	49.99	27.43	39.61	36.66	53.2	31.88	34.3	32.71	68.38	64.35	61.96	43.55	59.84	44.24	39.95
122773	KLHDC1	12.62	15.23	8.68	8.28	7.77	9.05	9.55	5.13	12.44	4.27	6.39	12.14	14.45	5.05	14.71	9.02	15.13	8.43	13.46	9.62	10.24	16.71	19.5	15.08	16.01	10.16	14.42	10.81	8.72	20.32	15.29	4.53	14.86	11.14	8.08	5.91	8.23	7.56	13.11	9.65	17.44	11.64	10.11	5.51	11.95	14.52	16.71	6.76
6262	RYR2	17.77	6.48	10.68	18.95	12.09	4.86	68.3	9.88	6.4	2.81	10.7	40.23	55.92	12.84	32.04	3.73	10.2	5.22	80.01	23.95	8.35	27.37	94.17	4.75	78.54	1.99	62.67	11.32	5.12	96.6	0.89	1.46	60.22	2.02	23.2	1.17	21.37	1.87	77.51	61.73	61.88	52.1	6.45	1.17	18.86	1.91	73.99	9.32
84418	CYSTM1	28.53	27.79	19.8	24.84	14.96	43.3	58.03	25.05	26.35	24.5	14.82	42.4	47.08	27.9	41.81	24	17.25	24.26	48.98	36.66	13.82	35.25	45.79	33.19	53.38	26.16	64.45	19.55	15.63	60.27	21.43	10.86	48.55	10.84	31.14	19.78	9.22	5.02	40.85	30.47	50.26	59.82	87.18	17.68	36.18	24.94	50.33	25.94
100288287	KRTAP22-2	0	0	0	0	0	0	0	0	0	0	0	0	0	0	0	0	0	0	0	0	0	0	0	0	0	0	0	0	0	0	0	0	0	0	0	0	0	0	0	0	0	0	0	0	0	0	0	0
9936	CD302	42.7	26.94	29.68	19.89	22.53	23.89	42.47	18.85	27.65	18.58	19.78	41.89	48.49	10.96	49.02	21.75	35.14	24.09	31.3	51.46	16.82	44.29	32.03	43.85	53.8	19.8	45.38	17.29	26.37	42.98	29.5	14	47.59	25.41	29.61	9	32	13.17	42.21	38.59	34.04	50.12	18.24	8.65	50.35	20.74	42.94	15.4
2531	KDSR	51.78	53.18	36.68	55.47	40.17	78.08	55.75	60.47	42.45	41.98	48.51	63.23	57.74	41.36	52.75	54.9	62.62	55.09	53.85	51.97	53.13	58.44	64.04	54.95	63.39	72.73	66.07	72.68	45.37	71.4	55.09	55.51	58.14	56.56	52.26	50.2	52.05	56.79	53.96	63.49	55.02	56.14	40.36	40.35	46.93	54.16	80.5	54.21
6038	RNASE4	39.77	15.96	21.79	19.72	12.84	11.55	34.94	19.82	31.89	19.87	11.48	34.55	40.13	8.62	44.78	13.81	18.76	15.75	44.61	32.28	4.38	21.82	36.38	27.2	41.45	6	55.43	9.99	11.95	55.85	12.1	7.29	36.04	19.44	13.37	9.76	17.2	10.99	48.18	25.36	28.56	54.4	18.86	8.96	44.27	10.25	45.79	10.43
1959	EGR2	11.78	10.42	5.99	14.18	5.34	15.61	60.64	16.62	14.75	9.01	9.74	34.74	53.99	29.74	17.61	14.49	18.49	17.32	28.19	23.41	8.76	47.1	22.86	34.54	19.66	26.47	26.19	15.82	3.6	23.17	26.53	3.08	20.08	11.69	14.41	15	3.99	27.77	20.09	17.29	14.85	29.29	3.16	4.6	127.21	99.98	21.25	11.94
1804	DPP6	3.36	0.74	2.87	2.66	1.76	0	18.32	0.72	0.4	0.21	3.43	10.2	13.94	0.41	11.15	1.39	1.27	1.31	19.74	6	0.82	7.24	38.58	1.27	11.61	0.21	29.61	2.53	3.81	14.62	0.54	0.45	15.6	0.97	2.5	0.13	1.65	0.45	18.23	6.89	23.51	11.32	0.67	0.24	1.23	1.38	9.46	0.99
9666	DZIP3	18.12	22.32	13.05	11.87	10.39	21.03	20.04	14.07	21.41	28.29	15.42	22.46	18.23	21.13	18.29	12.8	24.27	11.93	21.15	16.53	15	24.01	25.29	18.18	21.38	14.76	25.11	15.51	14.64	28	27.54	15.41	23.9	28.72	16.06	13.23	17.61	17.31	19.69	18.6	23.76	18.62	14.82	7.59	13.56	20.43	20.59	12.65
8774	NAPG	20.5	20.03	15.69	20.02	22.78	31.08	24	27.3	27.51	26.63	20.33	28.94	22.68	30.25	24.96	27.3	28.39	23.86	28.46	22.77	13.07	24.99	21.7	22.18	28.04	19.94	27.01	32.53	21.26	26.72	22.85	31.63	34.17	19.87	20.58	16.16	21.02	16.02	30.23	24.8	27.82	23.32	17.86	26.97	17.58	28.62	26.33	26.86
955	ENTPD6	38.15	57.77	31.35	49.22	39.91	49.53	40.59	92.35	65.2	100.51	37.01	51.39	37.35	60.36	43.99	39.38	50.02	57.57	36.23	51.28	68.23	47.9	47.51	50.25	39.88	127.69	51.12	57.51	33.57	41.06	34.41	53.79	37.68	120.31	48.97	102.27	59.49	110.94	36.17	48.7	82.45	55.44	78.23	41.66	61.29	117.69	54.48	86.56
79675	FASTKD1	22.25	32.01	16.17	24.35	18.95	25.19	13.36	21.62	28.75	37.22	28.9	26.75	23.08	18.53	21.65	30.03	35.99	31.4	18.74	20.46	32.96	30.27	20.4	27.35	16.68	41.43	22.74	54	29.12	29.07	34.79	60.78	20.16	48.41	30.23	24.9	28.97	24.65	14.86	22.62	31.6	14.95	28.87	19.13	17.54	43.05	28.05	35.13
90550	MCU	29.55	15.13	29.36	27.91	24.62	27.02	15.75	35.08	25.13	36.52	21.07	20.5	17.93	22.23	23.31	22.19	18.33	25.16	17.93	22.61	23.26	20.52	17.74	22.49	17.58	22.57	19.19	22.19	24.21	23.69	16.57	43.84	22.13	36.23	26.13	29.22	20.93	21.09	18.34	16.59	13.54	15.91	28.76	28.57	18.67	15.67	18.02	26.05
6905	TBCE	20.35	22.06	16.11	27.76	20.36	23.18	18.56	32.88	21.69	24.23	20.41	21.77	25.27	25.79	21.37	19.8	28.38	22.96	25.06	24.3	27.7	28.38	23.35	22.32	24.64	33.69	27.61	26.72	18.89	25.05	21.1	26.64	25.88	30.06	26.31	26.34	24.15	34.86	19.55	19.46	26.75	20.54	16.77	19.94	15.73	39.23	24.42	30.91
287015	TRIM42	0	0	0	0.19	0	0	0	0	0	0.16	0	0	0	0	0	0	0	0	0	0	0	0	0.23	0	0	0	0	0	0	0	0	0	0	0.5	0	0	0	0	0	0	0	0	0	0	0	0	0	0
107984751	LOC107984751	10.45	12.35	8.13	12	7.52	10.34	6.51	9.6	11.26	10.78	13.69	15.27	14.14	7.81	14.03	15.94	17.89	13.95	8.28	8.27	18.08	14.77	12.15	17.91	5.48	20.4	12.77	18.96	13.81	14.64	20.95	10.72	9.95	16.19	12.45	20.77	16	15.72	6.89	12.28	18.13	7.44	10.59	7.97	9.8	16.71	15.5	11.31
890	CCNA2	11.42	22.89	9.11	14.37	12.88	34.95	1.89	58.3	42.35	68.94	18.05	11.43	1.88	54.65	5.64	22.68	14.66	22.13	1.66	11.17	21.17	18.68	1.68	3.04	2.25	12.05	3.88	19.41	10.81	3.09	26.7	49.35	5.51	51.96	13.44	12.67	6.9	35.86	1.56	2.71	3.07	4.15	7.87	33.98	3.31	14.58	2.72	18.24
51807	TUBA8	2.52	3.65	2.88	5.09	8.93	7.33	13.29	3.35	3.71	3.21	2.73	4.84	5.26	6.48	10.85	3.54	4.11	4.39	7.51	5.73	2.52	4.42	5.5	3.93	10.23	5.2	16.99	1.45	1.68	5.49	5.63	1.46	6.98	4.81	2.45	0.95	2.58	1.15	5.59	3.17	15.43	12.55	2.93	0.97	1.99	3.72	6.88	4.38
55677	IWS1	23.7	29.48	25.39	27.9	23.29	29.4	27.2	34.88	47.67	54.27	30.79	34.08	22.64	26.68	23.1	29.65	41.01	38.31	26.72	36.75	44.74	38.7	33.27	39.86	31.77	60.61	30.98	36.5	23.36	33.22	49.07	39.43	31.09	53.35	34.62	35.43	41.09	35.46	27.07	36.09	40.47	37.06	29.1	28.48	25.15	52.81	34.71	38.23
2525	FUT3	90.95	72.48	156.45	12.97	137.74	1.33	1.74	23.69	21.31	7.23	143.64	14.71	12.02	53.33	103.3	6.2	35.72	17.67	1.83	2.12	58.53	18.15	4.82	6.1	1.82	7	3.66	28.02	152.01	2.37	6.41	190.82	37.95	10.75	149.82	11.84	187.03	10.07	2.66	2.2	34.09	3.18	154.33	22.73	21.54	26.86	5.29	50.55
10564	ARFGEF2	38.91	50.01	35.44	31.37	33.96	43.27	33.28	90.58	44.03	37.62	38.37	37.2	30.18	27.04	39.33	29.88	45.94	48.41	33.59	37.47	41.76	44.48	37.28	42.26	35.07	67.18	43.27	59.09	35.22	36.96	47.96	47.35	39.86	51.47	36.25	50.13	36.9	48.35	34.02	34.56	40.56	36.77	39.16	37.86	35.04	32.41	37	39.79
27246	RNF115	75.29	86.52	61.11	85.34	58.39	85.23	119.34	66.36	79.81	64.21	92.31	128.45	141.22	57.69	117.95	87.34	120.69	97.58	115.8	82.28	107.17	114.11	147.67	122.65	103.74	112.05	152.76	107.35	85.61	158.96	131.53	71.62	131.18	113.8	101.48	74.47	105.69	90.32	104.72	130.47	150.94	93.55	72.19	52.66	74.05	120.89	168.02	71.89
134864	TAAR1	0.16	0	0	0	0	0	0	0	0	0	0	0	0	0	1.54	0	0.22	0	0	0	0	0.22	0	0	0	0	0	0	0	0	0	0	0	0	0	0	0	0	0	0	0.42	0	0.31	0	0	0	0	0
55901	THSD1	10.63	5.06	9.43	7.33	7.32	26.95	17.12	4.61	10.48	18.3	4.07	12.31	15.58	28.21	11.77	12.81	10.15	15.63	11.75	16.12	13.01	19.61	8.83	11.64	13.61	10.96	13.23	11.67	5.75	17.54	5.2	3.14	10.55	4.38	8.86	20.8	7.71	22.5	14.77	9.74	5.66	9.77	4.77	30.36	12.53	6.13	9.24	13.22
3036	HAS1	8.72	0.73	1.93	5.08	0.37	0.66	30.24	0.98	4.17	2.25	1.62	16.4	64.28	1.9	7.8	6.1	6.51	5.14	8.36	10.44	1.1	9.54	6.87	140.07	8.31	0.85	15.28	2.28	0.45	4.47	2.08	0.2	10.81	2.53	27.02	1.67	6.79	2.18	14.93	13.76	9.19	11.5	1.18	3.84	17.73	1.63	43.43	2.56
90850	ZNF598	40.36	72.96	41.59	75.55	39.96	64.33	32.59	115.51	62.58	91.39	58.87	54.19	35.61	71.05	38.5	122.51	81.28	78.55	38.72	62.05	124.63	39.36	39.54	44.66	37.6	99.89	36.51	151.33	41.87	40.02	42.52	109.53	35.57	90.11	59.9	78.59	57.28	111.06	42.95	52.05	70.73	36.32	45.6	88.84	34.11	51.21	47.36	94.65
256815	C10orf67	1.51	4.51	1.24	4.01	1.81	4.18	1.35	2.36	2.38	1.89	3.09	3.25	2.93	2.19	3.13	3.57	3.1	4.27	1.29	2.18	3.69	3.62	1.19	3.33	1.75	2.12	3.12	3.16	1.99	3.02	2.3	2.55	1.18	2.82	3.97	6.63	2.6	3.56	2.07	1.14	2.73	2.1	1.33	3.95	1.5	4.71	2.1	3.75
9435	CHST2	10.44	19.88	8.43	17.26	6.07	47.87	19.35	6.6	30.49	9.88	10.5	26.16	10.86	12.72	9.43	13.93	27.81	28.67	18.03	27.59	25.82	12.32	20.17	34.66	12.64	13.6	13.95	11.44	5.77	14.84	32.08	5.51	7.5	5.43	9.21	3.73	3.64	7.02	14.59	12.08	9.1	9.57	3.6	22.41	18.5	24.18	10.76	26.45
8968	H3C7	125.71	335.29	167.38	184.44	269.65	534.28	3.83	735.31	441.56	634.58	225.02	100.7	17.7	327.01	68.4	242.66	223.01	305.33	12.83	186.01	172.06	170.62	3.81	41.13	18.56	207.99	2.62	291.83	159.23	9.37	333.52	969.89	46.36	652.57	124.88	281.31	73.97	456.44	2.83	16.46	41.18	27.08	83.76	698.15	112.79	333.61	9.62	154.84
9852	EPM2AIP1	16.91	15.9	13.02	13.73	12.72	13.19	14.46	13.21	20	12.8	14.91	18.12	14.84	13.53	17.82	9.58	19.89	16.11	19.06	22.33	16.63	21.63	19.54	20.22	22.52	11.49	19.95	10.62	15.19	23.2	23.64	12.46	20.71	24.69	14.72	8.39	13.68	8.24	20.6	17.08	17.36	16.55	15.39	7.35	17.37	22.7	21.4	12.56
22934	RPIA	15.73	17.08	21.58	13.82	22.1	18.74	9.9	31.56	25.92	25.96	25.72	13.52	9.89	13.52	18.18	9.79	13.11	11.99	12.72	22.62	11	12.4	9.3	13.23	10.1	21.63	11.89	21.48	19.43	7.76	25.27	30.34	10.88	31.17	17.35	19.04	21.83	12.96	12.16	11.76	13.07	12.69	19.91	10.61	20.5	17.24	9.01	10.63
8723	SNX4	15.38	14.27	12.08	14.74	19.7	25.54	16.98	30.18	27.51	33.55	16.29	16.07	19.19	33.11	23.61	17.84	21.75	17.49	17.72	25.16	21.01	21.95	19.74	16.9	23.47	14.73	16.39	16.29	17.49	20.07	15.87	19.84	18.31	24.83	15.11	14.38	17.4	23.39	16.77	18.58	16.56	19.04	15.49	13.3	19.52	23.96	15.89	18.93
131118	DNAJC19	17.39	16.65	15.27	17.94	20.9	27.59	28.02	28.97	21.9	29.72	17.24	28.17	16.54	30.87	23.21	16.02	21.32	21.34	20.65	26.8	28.58	41.78	15.51	19.81	18.81	16.01	22.96	21.47	17.04	23.84	20.75	36.44	15.81	29.75	9.2	15.75	9.44	12.75	21.14	16.16	22.02	19.52	10.63	29.19	19.42	21.29	10.44	21.12
1203	CLN5	29.45	32.96	26.57	27.53	20.52	41.78	24.01	21.78	29.29	23.42	32.18	39.29	32.77	30.59	36.44	29.92	40.04	31.22	25.52	31.41	36.04	42.59	34.01	41.17	29.09	43.34	40.81	32.66	28.81	37.67	56.81	26.5	28.95	33.17	31.89	33.24	32.36	36.15	25.65	31.95	42.97	31.83	26.74	30.31	28.11	38	40.59	26.43
25809	TTLL1	10.64	10.7	8.12	5.59	3.17	9.63	8.72	7.46	4.72	4.63	6.31	8.47	8.55	7.61	6.82	5.87	8.04	3.35	10.58	5.91	3.2	4.48	8.23	7.91	9.19	4.13	8.84	4.93	5.51	5.27	4.25	4.84	7.29	10.94	3.91	5.65	2.46	7.51	9.16	4.43	7.11	9.66	3.56	3.09	8.88	5.81	2.83	3.1
80273	GRPEL1	12.35	15.62	13.55	12.22	18.78	17.36	16.51	26.18	18.47	22.02	19.81	20.78	11.89	18.01	10.85	17.08	17.3	16.04	17.07	15.49	10.97	13.76	13.68	8.72	16.19	17.53	15.43	14.98	16.01	15.55	18.29	19.32	15.84	10.2	15.37	20.64	12.64	21.85	17.11	17.81	13.62	16.86	9.66	16.17	8.17	15.11	15.73	16.2
79782	LRRC31	0.92	0.21	0.33	0	0.17	0	0	0	0.83	0.17	0	0	0.71	0.18	5.98	0	0.52	0	0	0	0	0	0	0.28	0	0	0.24	0	0	0	0.51	0.35	0	0	0	0	0	0	0	0	0.49	0	13.82	0	1.82	0	0	0.2
149840	SHLD1	52.71	81.87	48.45	64.51	44.12	68.13	38.85	66.23	70.93	46.92	89.05	97.66	62.07	57.29	75.85	76.47	120.99	88.92	31.31	56.82	103.09	92.81	72.47	109.27	44.47	109.71	87.82	94.33	68.72	78.04	131.74	62.35	47.09	103.14	57.65	71.33	83.23	85.81	39.57	63.19	90.98	40.46	70.83	38.16	48.03	117.08	93.68	48.13
387882	C12orf75	22.69	15.12	14.77	52.03	10.9	128.67	5.06	18.54	23.4	30.08	14	7.84	7.13	11.66	10.34	38.97	40.04	25.97	2.59	23.54	64.94	79.9	1.79	28.98	2.41	47.57	7.85	41.95	11.01	3.77	17.42	222.91	8.36	25.94	18.29	73.55	14.76	13.06	3.66	3.38	10.31	4.77	16.49	50.42	33.04	232.88	1.94	104.74
55665	URGCP	28.27	35.22	22.18	29.37	25.66	32.22	30.92	31.74	29.38	35.13	26.17	39.77	25.88	30.95	28.86	18.91	26.44	15.31	43.78	29.17	29.39	28.43	44.33	25.78	34.2	20.95	40.15	53.63	23.01	41.25	19.84	30.58	29.42	16.31	25.14	27.57	35.8	44.85	41.9	33.4	41.29	37.27	24.25	18.13	23.2	42.52	43.57	24.37
168667	BMPER	3.99	1.51	3.09	2.46	0.64	1.2	3.02	0.24	5.4	1.24	1.72	2.88	3.89	1.79	2.61	0.87	3.35	1.75	1.35	1.53	2.17	2.81	2.85	3.74	3.46	2.34	2.98	0.56	1.39	3.58	1.15	1.39	3.92	2.35	1.13	0	3.36	1.44	3.29	4.67	2.97	2.66	2.48	0.62	6.53	0.9	0.92	0.34
26019	UPF2	26.3	27.1	19.3	25.52	20.52	24.69	21.94	34.17	31.92	31.27	24.6	24.51	24.47	25.06	20.56	20.49	31.97	27.83	26.84	33.66	49.25	36.95	28.75	23.38	33.26	32.02	26.36	24.27	21.16	29	49.53	47.44	29.34	28.05	21.25	18.87	30.1	28.44	24.22	27.74	29.17	23.87	20.19	20.29	17.85	25.8	26.93	30.52
221443	OARD1	17.36	26.15	18.84	10.88	12.34	31.81	14.64	26.39	24.18	18.17	16.76	11.52	8.55	17.61	19.52	13.93	14.16	11.01	21.38	16.95	12.58	20.96	19.13	13.8	24.42	18.22	26.83	24.14	22.82	19.23	30.47	33.35	16.92	34.41	15.7	9.85	14.88	20.16	16.22	15.53	16.57	11.49	17.19	11.33	18.97	19.49	13.67	13.2
57216	VANGL2	21.3	42.11	15.74	27.89	19.42	35.33	9.07	8.32	30.22	35.31	24.58	29.68	13.37	46.29	21.19	42.32	34.09	30.61	16.95	18.14	42.09	18.86	17.06	12.26	11.45	30.97	8.67	32.96	28.62	19.65	17.39	25.2	9.04	77.64	14.36	43.73	23.26	61.56	11.54	14.42	17.12	8.38	18.26	36.34	11.66	46.32	12.1	27.27
9564	BCAR1	44.21	81.69	36.6	89.79	38.91	72.57	75.27	106.24	58.5	69.2	49.35	54.65	76.05	101.18	50.09	92.61	63.42	93.58	60.01	63.57	68.82	46.61	61.64	69.12	56	101.88	48.71	47	39.41	61.13	14.38	62.19	45.56	47.47	88	96.08	54.97	95.27	61.46	81.97	67.55	62.48	56.66	92.03	39.14	32.19	75.58	63.64
336	APOA2	2.07	0	0	0	0	0	1	0.95	0	0	0	6.85	6.62	0	2.56	0	0	0	0	1	0	2.86	2.66	2.97	2.05	0	0	0	0	0	0	0.95	2.26	0	2.22	1.44	1.46	0	0	0	2.78	0	0	0	5.01	0	0	0
5064	PALM	59.7	30.23	31.11	22.6	21.81	18	82.89	20.58	30.34	11.42	19.84	65.94	70.01	21.55	56.22	26.51	24.78	18.61	116.17	66.15	5.57	24.71	70.47	79.66	72.17	4.06	84.12	5.7	16	74.73	8.56	1.19	51.51	42.64	34.67	15.85	18.57	3.34	75.39	64.54	33.39	56.37	11.96	3.45	74.59	4.62	62.73	8.74
219854	TMEM218	8.51	9.93	5.83	3.31	5.97	7.98	6.46	7.74	8.19	9.96	7.14	6.05	6.02	5.57	6.84	5.13	5.18	7.02	6.01	7.11	8.44	8.84	7.58	6.64	6.61	5.32	5.71	6.08	7.25	7.42	10.7	5.57	4.98	7.68	5.76	4.07	7.05	5.04	5.34	3.88	5.01	6.25	7.18	4.1	6.76	2.81	6.9	7.8
23761	PISD	31.53	38.23	25.25	29.98	33.83	35.39	24.8	44.13	47.11	54.87	42.2	35.49	25.22	35.86	24.2	27.39	42.24	33.29	19.17	30.74	44.93	34.73	24.05	39.07	17.58	52.33	23.12	27.88	31.24	21.1	45.19	44.26	22.45	36.53	43.21	31.82	50.88	37.07	20.51	28.88	35.06	20.65	34.43	28.24	25.76	60.54	23.7	29.58
55096	EBLN2	8.81	17.43	6.33	6.69	12.04	13.42	7.06	9.69	9.03	9.09	10.6	13.93	12.87	6.51	11.11	10.55	13.3	12.68	5.67	7.57	13.23	18.12	11.11	21.97	8.22	7.11	14.7	11.28	9.5	9.15	20.91	6.2	12.38	23	8.96	7.37	17.57	10.06	7	11.99	10.46	5.37	7.11	7	7.1	27.8	12.97	12.39
55954	ZMAT5	23.55	20.14	30.84	26.59	23.22	38.99	24.83	30.39	19.68	30.58	25.53	19.8	19.83	34.78	19.81	17.16	28.11	19.27	29.24	22.18	33.41	21.43	21.3	16.86	29.58	22.04	26.89	17.61	19.13	26.77	23	24.94	19.24	10.51	24.03	25.97	15.85	29.72	30.14	16.31	12.93	33.99	23.71	39.8	24.3	15.21	19.32	30.19
3226	HOXC10	2.97	22.41	0	2.06	0.2	22.96	0	12.35	0.49	0.43	5.45	2.42	0	25.99	0.56	3.26	2.84	11.52	0.21	4.63	11.47	15.45	0	2.29	0.23	18.17	0	8.1	0.48	0.62	0.32	11.7	0	51.93	7.09	21.87	0	3.31	0	0.95	1.23	1.12	0.22	4.37	0.44	66.82	0	9.24
1497	CTNS	27.72	41.16	24.21	37.23	23.5	41.11	21.99	34.34	36.86	50.54	39.15	38.85	35.51	30.02	30.77	39.97	52.4	44.84	27.42	28.5	38.49	40.62	34.1	47.81	23.37	55.31	37.01	49.23	35.45	38.33	44.87	33.15	26.09	44.04	32.24	37.11	33.33	48.23	24.33	31.5	47.56	30	37.8	24.88	26.77	48.49	34.18	34.34
92017	SNX29	51.89	60.12	47.75	58.3	43.46	51.28	38.89	36.79	75.35	69.71	39.74	44.73	47.28	30.27	44.89	74.19	65.23	57.2	36.73	47.58	104.67	50.54	42.62	108.49	38.14	107.11	46.83	67.62	42.48	37.78	143.31	33.93	44.93	38.09	39.98	47.64	77.53	105.66	28.23	37.25	76.6	51.07	46.54	46.78	66.85	50.26	52.51	55.39
5510	PPP1R7	42.67	46.77	60.36	33.01	48.9	51.45	50.16	57.89	43.27	40.33	40.78	49.32	33.7	32.87	43.14	39.98	42.24	40.85	53	42.35	38.96	49.19	33.21	21.88	57.78	39.59	46.1	44.51	56.79	49.89	43.26	24.59	40.32	64.69	50.12	29.28	34.58	13.09	53.61	41.68	32.98	54.61	51.26	48.12	33.01	28.21	44.87	30.79
11338	U2AF2	89.93	143.89	99.15	112.37	104.41	122.51	85.41	135.26	103.72	115.05	134.57	97.67	81.69	173.52	84.94	112.16	139.5	156.31	94.82	121.87	103.37	91.87	95.12	103.89	92.66	160.85	91.39	147.11	96.54	97.01	167.71	162.3	73.42	196.31	93.24	157.45	82.69	149.76	91.76	103.13	119.47	97.28	92.34	100.23	87.7	175.49	99.63	120.99
114327	EFHC1	10.47	9.49	7.72	9.87	7.22	10.84	7.13	7.7	11.05	9.05	9.39	11.57	10.8	6.08	12.2	10.74	11.75	11.88	7.3	7.66	12.4	11.4	10.6	16.7	7.63	14.58	13.05	12.94	10.68	13.28	13.99	7.78	9.81	25.04	12.07	5.08	13.08	11.9	6.81	11.98	16.07	8.36	9.29	7.48	8.08	10.33	12.47	7.28
389792	IER5L	18.7	18.69	20.12	51.22	16.8	83.31	42.24	38.51	24.88	29.77	13.82	29.08	31.09	82.02	10.62	32.24	14.87	37.95	19.77	55.67	13.78	35.15	18.06	26.54	34.8	72.62	26.7	18.43	7.14	38.49	7.34	24.65	23.8	27.86	16.28	26.62	21.71	32.37	21.65	36.46	28.88	45.77	14.17	34.46	29.1	15.01	28.03	25.72
5430	POLR2A	95.52	128.04	91.39	93.09	101.64	144.4	73.58	140	137.26	185.96	120.67	92.41	82.64	215.57	92.81	109.71	109.67	123.48	63.48	108.4	109.52	84.13	61.61	117.92	68.84	143.46	69.98	123.26	100.37	50.04	120.96	152.63	80.05	170.58	114.86	125.32	106.88	222.37	62.31	88.99	90.61	79.84	109.49	123.75	96.02	247.71	81.58	113.83
337882	KRTAP19-1	0	0	0	0.81	0	0	0	0	0	0	0	0	0	35.02	0	0	0	0	0	0	0	0	0	0	0	0	0	0	0	0	0	0	0	0	0	0	0	0	0	0	0	0	0	0	0	0	0	0
7482	WNT2B	32.07	20.28	14.18	12.62	22.11	24.86	11.04	25.59	17.6	17.71	20.13	22.61	14.12	6.16	21.33	14.04	22.39	19.01	11.11	12.44	19.53	15.73	14.61	14.98	12.24	22.75	26.74	25.38	25.07	16.72	17.74	10.97	15.26	14.18	16.88	11.98	21.56	32.26	10.11	21.78	16.3	10.97	15.16	7.31	18.11	29.24	16.24	26.01
8802	SUCLG1	64.21	55.94	60.41	44.81	76.36	52.16	78.11	55.84	81.13	104.41	72.36	53.85	56.69	56	60.1	44.99	36.89	40.27	67.47	59.1	41.95	53.23	64.37	26.85	70.14	46.1	71.55	55.22	79.27	70.71	39.51	94.93	74.65	40.48	61.33	62.02	48.32	60.53	74.03	46.48	37.76	60.97	59.3	40.62	45.3	37.11	51.58	54.9
91752	ZNF804A	0.49	0.56	0.62	0.22	0	0.43	0.19	0.63	0.85	0.64	0.21	0.13	0.13	0.09	0.85	0.47	1.36	0.59	0.55	0.85	0.84	0.27	0.25	0.56	0.97	0.56	0.39	0.5	0.31	0.13	3.27	0.45	0.11	0.41	0.21	0.55	0.14	0	0	0	0.13	0.29	0.39	0	0.48	0	0.27	0
7270	TTF1	34.26	31.44	28.7	29.05	22.2	37.19	19.17	35.06	35.96	39.87	31.09	40.13	23.95	34.76	33.06	28.98	42.87	32.79	32.09	27.87	37.04	39.28	30.47	32.64	24.9	41.25	30.77	37.51	31.94	33.45	47.68	39.97	25.79	35.01	28.12	31.06	26.64	44.52	22.96	37.5	41.18	25.43	33.63	25.65	28.05	41.53	38.7	31.74
3798	KIF5A	0.97	0.37	0.35	1.3	0.35	0.62	2.15	1.2	0.58	0.29	0.33	2.44	0.98	0.73	2.79	0.48	0.42	0.29	4.78	2.8	0.89	1.48	2.86	0	1.97	0.8	4.47	0	0.93	2.81	0.45	1.4	1.51	6.15	0.33	0.22	0.57	0.1	3.38	1.28	2.06	1.35	0.63	0.17	0.97	9.38	1.34	0.86
110599563	LY6G6F-LY6G6D	0	0	0.88	0.79	0	0	0	0.45	0	0	0	0	0	0	0	0	0.48	0.59	0	0	0.6	0	0	0	0	0	0	0	0	0	2.03	0	0	0	0	0	0	0	0	0	0	0	0.96	0	0	0	0	0
5443	POMC	0.82	1.86	0	15.21	2.12	0.45	1.97	5.69	2.21	1.17	1.02	10.34	1.56	0.74	0.5	0	2.16	1.47	4.54	5.11	0.5	2.25	4.19	5.26	3.22	0.58	2.16	0.52	1.29	2.21	1.7	2	1.78	1.15	0	0	0	17.25	4.29	1.7	2.74	4.39	1.21	0	1.18	4.66	2.83	1.33
1363	CPE	117.03	20.62	68.26	37.9	56.72	78.31	172.45	43.64	73.51	18.41	35.82	108.89	206.16	132.78	115.23	26.02	64.89	25.25	171.14	104.57	14.26	55.63	130.15	115.01	146.39	20.49	157.5	21.34	39.13	149.51	34.96	14.3	146.02	191.94	72.33	5.79	36.53	11.55	151.37	116.36	98.49	130.99	41.42	9.97	153.54	67.08	113.93	24.61
29951	PDZRN4	10.9	1.35	4.14	6.09	4.22	3.51	36.66	3.85	2.7	0.62	3.18	21.41	29.93	0.83	12.66	3.81	3.64	2.22	40.23	15.59	0.8	9.85	53.84	9.02	36.86	0.75	39.22	0.41	3.11	43.25	0	0.3	24.3	0.55	9.64	0.45	5.99	0.48	47.72	29.77	24.35	27.73	3.11	0.28	10.92	0.53	18.38	2
93426	SYCE1	0	0	0.3	0.38	0	0	0	0	0	0	0.79	1.93	0	0	0	0	0	0	0.34	0	0	0	0.43	0.52	0	0	0.48	0.46	0.38	0.49	0.51	0	0.4	0.51	0.78	0	0	0	0	0.51	0.98	0	0	0.71	0.35	0	0	0
147906	DACT3	46.59	18.86	38.59	67.87	33.48	31.6	127.54	26.87	18.27	7.83	19.09	142.83	143.35	14.12	48.93	28.72	26.3	23.9	232.64	105.73	5.01	50.52	187.2	29.78	177.6	7.83	113.33	4.05	10.84	240.88	2.71	1.62	84.05	12.47	72.44	9.86	34.85	10.09	204.87	149.3	115.27	152.19	17.85	6.8	57.89	3.85	232.77	17.41
57585	CRAMP1	22.38	30.01	19.08	26.24	21.91	26.09	22.48	33.69	29.39	31.12	24.3	28.35	22.11	27.93	24.78	39.01	29.38	31.58	25.28	24.37	42.19	27.36	33.91	29.4	21.76	39.4	29.88	26.54	22.99	23.84	29.05	23.37	20.33	73.28	18.2	24.16	29.95	46.23	24.93	22.36	34.49	17.77	28.88	21.48	17.4	30.35	32.44	25.24
100631383	FAM47E-STBD1	2.16	0.79	2.35	0.34	1.77	0.57	2.83	0.46	0.34	0.85	0	3.53	7.58	0.95	5.37	0.65	0.47	1.5	1.14	0	0.52	0.88	2.98	1.29	9.03	1.67	5.6	0	0	7.82	0	1.01	0	0.32	1.56	0.21	1	0.79	6.9	2.55	6.16	13.08	1.98	0	5	0	9.88	1.06
9114	ATP6V0D1	77.26	109.56	91.23	87.74	87.4	78.56	84.51	108.14	98.99	104.47	100.53	86.77	80.33	120.59	86.87	135.25	105.16	135.33	96.55	119.35	87.95	90.51	72.59	87.87	100.6	56.22	89.01	66.54	94.98	86.85	78.14	61.36	77.08	37.16	76.34	113.68	63.95	134.58	88.38	77.67	61.24	97.51	64.44	92.27	61.51	49.21	83.89	81.04
138429	PIP5KL1	4.92	6.28	3.76	10	3.26	5.07	2.6	2.49	3.3	4.54	6.81	4.12	1.93	7.58	2.04	20.52	3.96	3	1.93	2.71	9.86	8.64	3.11	6.66	1.43	4.44	2.19	10.73	9.42	2.26	6.72	5.01	2.85	14.05	7.81	4.88	6.62	21.26	1.59	1.74	6.72	3.06	6.16	19.6	2.05	8.48	2.3	9.81
157680	VPS13B	59.96	73.5	49.3	69.46	47.18	62.12	37.2	79.47	68.07	42.6	57.94	62.5	57.99	43.34	54.91	58.25	78.98	71.48	43.96	54.1	101.58	104.05	55.1	88.07	45.95	84.82	54.58	107.56	50.45	65.4	103.07	83.24	64.09	122.1	86.96	65.38	88.64	77.66	38.56	58.39	68.22	45.34	58.94	39.38	64.8	221.85	67.12	88.16
29887	SNX10	2.22	7.43	4.06	10.83	2.08	22.88	1.61	11.67	11.9	16.08	2.42	4.81	4.02	17.39	2.67	12.1	9.45	12.74	2.87	24.29	8.12	19	1.45	12.67	2.36	5.5	4.09	4.24	2.05	2.97	22.73	12.54	1.26	7.59	2.27	9.79	3.19	11.37	5.78	6.39	1.75	6.45	1.99	6.98	6.1	7.63	2.92	2.77
83637	ZMIZ2	67.54	97.83	64.49	88.27	64.53	85.58	58.44	79.27	91.94	87.42	86.34	77.25	66.93	81.03	69.03	76.08	75.22	65.75	59.25	84.24	114.35	98.93	72.75	120.7	66.15	57.94	65.08	97.76	65.1	64.73	135.58	68.49	55.88	68.15	67.3	39.07	89.75	79.84	52.63	70.88	122.15	54.07	84.76	64.24	64.11	84.05	85.52	80.32
84839	RAX2	7.82	11.37	4.24	9.43	6.76	8.93	6.18	5.38	8.62	4.93	9.72	14.99	15.66	5.36	13.77	9.42	11.83	8.94	9.27	6.18	12.58	13.42	14.53	15.74	5.45	11.13	12.17	13.15	10.5	15.3	16.77	7.75	7.29	14.66	6.76	7.08	10.17	10.13	4.94	9.21	13.37	6.65	5.79	6.48	5.64	13.95	17.13	7.69
57645	POGK	40.45	48.01	31.93	42.84	39.77	42.67	33.38	65.07	47.44	40.93	46.55	44.45	28.23	54.72	34.82	32.2	50.98	50.64	37.19	46.3	43.64	54.36	31.31	35.44	33.1	46.9	39.19	39.24	35.77	39.67	37.41	44.35	38.9	76.58	33.66	31.38	44.11	40.48	43.6	36.24	41.19	43.16	33.92	29.12	34.93	66.4	37.69	33.46
339983	NAT8L	0.66	0.33	0.53	0.58	0.19	0.57	0.71	0.67	0.55	0.82	0.72	1.07	0.75	0.66	0.9	0.09	0.61	0.44	0.95	1.91	0.54	0.81	0.66	2.83	0.94	1.87	0.78	0.09	0.31	0.4	0.71	0.4	0.56	1.54	0.39	1.32	0.1	0.09	0.14	0.71	1.48	0.5	0.87	0	0.85	3.97	0.1	0.23
54511	HMGCLL1	6.71	11.39	5.74	7.11	5.78	8.31	7.9	4.06	6.11	4.36	7.05	11.15	6.43	4.27	7.7	6	6.81	8.22	4.22	4.42	7.46	11.12	4.72	8.5	6.21	5.35	9.19	9.31	6.22	5.97	10.4	4.61	7	12.8	5.72	4.38	8.09	5.76	4.21	4.84	7.68	5.3	4.17	2.61	2.38	7.05	3.87	3.91
2266	FGG	0	0	0	0	0	0	0	0	0	0	0	0	0	0	0	0	0	0	0	0	0	0	0	0	0	1.87	0	0	0	0	0	0	0	0	0	0	0	0	0	0	0	0	0.26	0	0	0	0	0
107984974	LOC107984974	444.77	530.97	541.87	353.64	577.41	390.88	409.11	479.38	546.23	636.79	538.47	389.74	385.42	599.54	462.8	344.98	419.15	374.25	383.08	461.24	318.3	528.67	333.44	403.95	327.01	358.33	365.72	542.52	517.23	437.7	567.96	480.8	329.73	585.88	374.52	269.96	282.53	285.35	374.91	288.81	315.41	369.48	481.78	425.41	562.41	500.44	366.64	390.83
285190	RGPD4	4.18	3.25	3.15	3.8	1.76	3.49	2.93	1.27	4.33	4.09	3.91	5.4	4.77	4.34	5.06	4.26	5	3.13	3	3	4.52	2.48	4.39	6.27	4.37	5.98	5.3	3.31	3.41	7.28	5	2.65	4.04	11.82	6.49	3.19	1.96	5.38	1.35	5.94	5.21	2.88	4.76	1.77	3.45	4.15	7.28	3.03
85461	TANC1	51.72	55.58	41.9	54.1	44.96	45.26	49.57	54.29	47.05	56.96	44.05	65.13	56.57	34.82	61.78	47.58	53.84	49.64	48.86	44.86	51.29	57.15	58.8	31.65	62.07	62.19	61.97	55.73	51.48	73.76	13.68	58.02	53.51	90.04	63.06	35.72	68.49	42.12	58.2	60.3	72.5	54.4	48.79	33.99	38.51	53.81	71.69	55.62
5136	PDE1A	12.27	5.11	7.09	5.82	5.96	5.83	18.54	4.73	8.21	3.41	6.29	18.37	20.33	3.89	24.84	9.02	6.32	7.73	18.51	17.22	1.91	12.05	11.23	21.47	18.58	1.98	19.81	3.05	5.74	15.41	4.02	1.53	20.15	3.23	6.66	1.66	6.61	3.74	18.49	18.52	10.99	21.91	11.01	1.52	20.47	4.23	14.65	2
64184	EDDM3B	0	0.58	0.46	0	0.44	0	0	0.46	0	0	0.55	0	1.29	1.37	0	0	0	0.61	0	0	0	0	1.3	4.35	0	0.72	0	1.28	0	0	0.7	0	1.1	1.42	0	0	0	0	0	0.7	0.68	0.99	0.5	0	0	0.69	0.7	0
345222	MSANTD1	1.35	2.3	1.4	1.46	0.53	1.79	1.33	0.35	0.95	2.75	3.44	2.66	3.1	0.87	2.18	0.33	3.08	1.09	2.47	0.47	1.57	2.03	4.27	1.32	0.6	0.67	3.5	1.13	2.38	2.27	7.14	0.59	0.74	1.57	2.85	2.16	1.66	0.4	0.56	1.63	4.16	1.27	2.4	0.42	1.95	1.03	2.33	1.34
390036	OR52K1	0	0	0.4	0	0	0	0	0.41	0	0	0	0	0	0	0	0	0	0	0.83	0	0	0	0	0	0.44	0.64	0	0.38	0	1.21	0.62	0	0.98	0	0	0	0	0	0	0	0	0	0	0	0	0	0.62	0
79730	NSUN7	6.43	8.08	7.21	6.81	8.29	7.45	5.82	6.66	7.84	4.75	8	8.66	9.43	6.65	7.78	5.95	9.31	5.49	6.29	5.97	4.17	7.68	9.16	8.33	5.27	10.07	10.35	5.46	11.03	7.52	6.02	8.9	7.33	21.32	11.78	7.99	13.82	4.74	5.53	5.03	10.22	5.92	18.8	3.89	5.84	10.22	7.14	4.47
115861	NXNL1	2.16	5.95	1.91	1.76	2.96	3.8	3.05	2.01	3.98	3.94	5.43	4.61	8.12	1.83	2.06	6.46	3.2	6.49	2.41	2.08	4.27	4.67	5.65	6.63	2.69	5.2	6.36	2.37	2.49	2.85	2.02	1.55	3.56	8.6	2.83	3.7	6.59	4.89	1.85	7.44	2.02	4.06	3.21	5.8	2.49	5.91	6.07	3.25
54987	CZIB	41.31	27.93	47.83	40.68	40.84	53.02	65.1	39.6	41.03	35.09	33.89	51.4	48.48	40.75	51.57	25.1	43.81	36.32	96.51	60.87	30.57	54.32	65.51	39.2	75.37	29.33	66.93	26.74	27.78	68.83	30.16	37.74	58.07	23.47	34.89	29	35.22	27.83	77.94	50.58	58.67	69.45	32.15	32.66	57.07	35.67	58.01	28.63
55294	FBXW7	52.33	61.45	42.65	42.31	33.98	33.17	38.03	46.79	78.64	37.86	37.61	53.02	43.89	37.22	30.34	46.49	83.91	92.23	49.18	67.79	70.17	63.68	45.91	77.48	46.96	47.89	33.07	57.35	44.52	43.7	77.25	35.92	61.99	41.31	51.2	31.46	67.3	58.08	43.25	53.04	55.27	40.43	44.41	32.3	49.04	41.38	32.22	38.31
387496	RASL11A	40.51	14.21	44.43	55.14	32.45	18.35	358.97	13.32	23.59	16.06	24.22	98.81	205.71	4.22	55.76	18.51	26.56	13.72	241.5	62.07	10.81	35.1	148.04	27.51	79	8.11	27.47	6.57	20.75	80.05	23.05	15.19	160.67	2.19	48.87	1.44	49.8	3.14	111.06	195.02	68.32	442.57	17.38	0.38	96.34	70.3	142.76	38.69
4124	MAN2A1	43.68	46.98	40.84	56.57	33.88	37.84	37.19	35.11	49.33	30.08	33.38	35.23	39.41	27.67	36.4	31.18	42.05	39.55	28.26	50.05	46.19	35.02	26.83	48.91	32.06	38.29	28.6	42.3	27.59	24.54	66.78	46.96	35.65	19.43	40.54	39.38	32.64	22.39	33.12	41.11	30.66	42.37	41.81	50.37	44.52	30.76	33.1	43.02
100526693	ARPC4-TTLL3	14.51	9.27	10.95	14.42	14.65	9.43	7.94	5.96	7.05	8.28	5.55	11.16	15.99	4.49	16.92	12.91	14.85	11.41	12.04	13.19	21.43	16.4	18.52	26.98	7.89	11.44	15.43	6.04	17.66	11.19	18.85	7.35	12.88	13.61	12.53	4.95	15.57	8	9.01	8.62	19.58	9.2	16.7	6.05	12.82	15.58	22.19	9.7
389763	SPATA31D1	0	0	0	0	0	0	0	0	0	0	0	0	0	0	0	0	0	0	0	0	0	0	0	0	0	0	0	0	0	0	0	0	0	0	0	0	0	0	0	0	0	0	0	0	0	0	0	0.1
1832	DSP	772.14	661.31	838.18	389.85	1207.31	362.44	7.59	364.17	584.18	821.43	782.58	156.46	18.92	769.98	509.08	819.26	561.92	351.89	7.35	63.2	1431.05	645.13	3.81	9	9.86	527.86	6.08	534.21	1295.07	8.27	9.49	204.26	469.96	485.59	691.73	1158.4	1054.69	1285.18	4.13	21.13	258.32	14.46	946.25	1256.19	92.19	338.13	5.45	1608.94
259307	IL4I1	6.05	33.08	6.13	16.24	4.16	13.09	2.93	8.32	12	4.49	11.21	12.33	5.8	29.14	2.49	17.08	12.9	37.85	2.1	34.52	14.51	16.35	2.27	12.28	8.96	7.52	2	30	2.65	2.39	44.77	21.67	2.2	7.08	4.86	23.08	4.27	3.65	1.69	5.24	5.76	29.58	3.48	21.97	7.31	10.58	4.2	5.91
388595	TMEM82	0	0	0	0	0	0	0	0	0	0	0	0	1.21	0	0	0	0	0	0	0	0	0	0.41	0	0	0	0.42	0	0	0	1.75	0	0	0	0.34	0	0	0.38	0	0	0.42	0	0	0	0.61	0.43	0	0
284021	MILR1	52.77	55.46	53.43	68.81	50.07	62.68	42.21	44.16	79.53	43.32	78.8	87.42	60.82	38.45	69.29	63.81	81.68	69.32	36.07	58.58	74.27	88.37	65.99	90.27	49.13	94.15	63.93	71.41	59.28	68.51	121.22	39.94	50.43	63.26	59.26	58.41	80.21	74.93	37.05	73.62	88.21	57.25	63.61	38.04	53.8	87.8	82.92	50.31
57084	SLC17A6	0.12	0	0	0	0	0	0	0	0	0	0	0	0	0	0	0	0	0	0	0	0	0	0	0	0	0	0	0	0	0	0	0	0	0	0	0	0	0	0	0	0	0	0	0	0	0	0	0
347744	C6orf52	0.82	0.59	0.74	1.48	0.71	2.96	0	1.59	0.63	0.54	3.58	1.6	1.77	0.94	0	0.97	3.53	2.31	1.24	0.79	6.47	7.3	1.05	3.52	2.03	2.33	0.69	0	4.99	0	0.81	2.86	0	1.94	1.11	1.14	0.74	1.33	2.35	5.1	3.45	0	2.13	0	2	4.12	3.91	1.75
5518	PPP2R1A	101.64	96.72	112.22	86.92	99.79	95.89	112.71	110.07	87.45	79.22	98.24	95.46	97.43	125.36	104.22	89.17	79.02	105.34	133.39	102.46	60.97	63.28	114.36	73.91	108.96	96.63	99.03	84.33	98.58	117.77	85.84	78.63	98.63	116.51	89.49	165.52	88.7	101.65	130.64	102.19	100.99	109.31	90.45	81.07	85.99	120.64	109.46	74.98
51529	ANAPC11	32.63	48.59	35.72	33.64	43.72	46.59	38.75	59.67	28.75	40.08	51.27	43.03	31.26	46.33	35.78	35.88	46.43	50.4	54.88	37.44	27.93	35.59	33.67	18.68	47.53	18.89	38.32	43.06	49.04	43.83	31.38	69.4	42.96	33.91	32.09	77.86	25.45	51.86	50.16	38.03	28.58	55.41	39.47	51.67	49.12	45.36	41.74	30.67
3983	ABLIM1	291.03	97.68	249.55	77.65	247.34	68.08	116.59	175.62	149.69	127.2	235.07	155.4	128.35	75.79	257.39	107.65	194.78	96.77	111.82	109.04	201.99	98.41	115.93	139.81	113.35	117.48	186.6	93.2	352.06	120.41	127.93	138.28	215.21	49.51	323.09	82.05	342.47	108.99	118.16	111.4	156.18	121.71	269.84	112.94	129.88	84.92	112.25	191.7
388677	NOTCH2NLA	4.99	6.08	4.92	4.02	5.73	8.25	4	3.76	3.8	2.8	9.84	9.42	6.18	4.88	8.39	5.75	7.09	9.62	3.39	5.66	11.23	9.09	7.64	12.01	6.85	3.81	9.35	8.02	7.4	9.44	12.07	3.32	7.34	10.15	7.22	9.56	7.15	1.32	2.4	4.5	9.58	5.3	5.67	1.99	3.05	8.19	5.97	5.85
3707	ITPKB	114.58	98.73	111.11	128.52	109.73	98.04	221.91	79.04	98.97	85.65	90.61	187.5	223.65	54.96	134.88	83.85	129.95	96.36	338.98	161.13	139.06	148.69	268.67	140.55	223.15	118.11	277.14	73.99	76.43	398.46	218.96	53	161.74	94.79	117.74	54.99	117.82	115.69	243.17	211.77	195.53	175.63	83.08	57.67	130.39	98.72	237.38	93.45
9683	N4BP1	34.97	42.18	42.15	31.56	38.47	32.38	20.88	36.4	48.64	51.25	41.59	31.02	19.7	56.66	33.14	65.88	40.62	48.44	22.93	29.78	59.16	46.5	20.68	23.12	31.85	49.83	24.45	41.87	35.85	21.27	30.59	27.77	27.78	26.11	37.12	48.22	43.66	75.61	24.3	19.88	24.22	21.41	32.26	49.12	18.72	17.23	22.86	42.13
491	ATP2B2	0.45	0.15	0.35	1.31	0.56	0.17	1.78	0.3	0.28	0.18	0.7	0.77	0.33	0.53	1.84	0.08	0.45	0.31	2.17	0.75	0.55	0.81	1.77	0.28	1.36	0.09	0.83	0	0.14	0.44	0.35	0	1.75	0.27	0.14	0.18	0.49	0.12	1.16	0.63	0.78	0.83	0.13	0.14	1	0	0.27	0.28
875	CBS	3.59	5.6	2	24.72	2.24	12.47	2.47	29.43	19.34	33.75	3.04	10.43	3.06	46.21	2.86	1.92	1.77	4.74	4.86	6.49	7.35	1.65	0	4.38	9.23	24.68	5.9	8.94	0	4.59	2.61	21.96	2.85	41.08	2.33	4.31	2.22	17.76	7.15	3.36	6.44	6.21	4.67	9.2	6.74	19.25	7.92	36.64
55711	FAR2	14.17	5.88	9.03	10.84	9.59	6.83	17.12	5.39	10.31	9.73	7.51	12.9	16.87	15.8	14.84	7.55	9.23	8.16	17.64	14.04	4.82	11.59	11.33	12.79	18.5	4.66	16.92	6.84	6.93	15.55	15.52	12.28	15.93	17.86	5.8	2.1	6.67	3.13	14.48	11.96	10.42	21.56	4.91	3.21	13.67	17.75	12.94	3.12
100287513	USP17L22	0	0	0.03	0	0	0	0	2.17	0	0	0	0.34	0	0	0	0	0	0	0	0	0	1.84	0	0	0	0.13	0	1.61	1.35	1.64	0	1.32	0	0	0	1.19	0.4	1.59	0	0	1.87	0	0.39	0	0	0	0	0
163051	ZNF709	15.34	26.21	16.16	27.43	12.97	20.85	12.44	18.26	18.63	19.6	24.8	25.31	25.92	12.04	24.92	24.83	29.13	23.66	12.96	17.05	32.72	26.2	20.65	33.11	13.67	35.35	24.03	26.17	26.5	30.89	35.94	19.34	19.71	36.67	24.56	23.03	31.36	29.61	11.05	24.23	32.36	14.01	24.73	14.04	18.78	36.35	28.24	20.78
90268	OTULIN	40.2	52.46	34.85	48.27	35.91	96.26	27.28	37.23	58.77	62.85	56.89	57.04	41.32	43.61	49.05	44.27	79.77	64.23	26.08	40.4	106.3	64.47	42.2	67.86	29.57	113.39	47.83	64.98	48.73	48.5	97.92	46.88	35.1	57.98	57.41	44.72	50.53	52.61	26.98	44.03	60.96	34.88	42.6	40.73	33.4	56.59	54.48	48.07
5099	PCDH7	44.58	71.36	39.05	66.57	48.9	68.57	123.23	31.75	21.72	7.18	44.06	99.54	80.53	29.74	60.27	52.49	23.29	25.58	148.95	59.94	20.88	74.19	147.98	11.61	127.2	105.73	138.38	23.12	18.86	125	2.05	20.93	135.86	10.65	86.46	18.59	38.14	39.58	100.56	102.02	117.01	118.98	41.36	84.22	52.28	2.76	131.08	45.85
4543	MTNR1A	1.81	2.41	2.95	3.28	1.68	3.54	1.35	1.48	2.35	2.97	2.14	4.38	2.01	2.15	2.46	2.23	4.71	2.51	0.58	1.57	3.02	2.56	2.05	2.81	2	4.32	3.67	5.48	2.99	3.56	4.54	1.92	1.54	8.4	3.23	0.65	4.53	3.19	1.25	1.6	3.23	3.17	2.6	3.69	1.12	3.14	3.61	2.51
7432	VIP	0.89	0	0.27	6.17	0.26	1.27	16.69	12.91	0.32	0.28	0	7.98	6.45	0.27	33.72	1.71	3.18	2.77	48.25	26.41	0	11.11	2.22	0.85	20.73	1.69	56.96	0	0.94	3.12	0	0.79	17.87	0	1.23	0	2.1	0.36	36.89	7.98	4.25	1.45	2.05	0	0.57	0	0.4	0
5458	POU4F2	0	0	0.13	0.16	0	0	0	0	0	0	0	0	0	0	0	0	0	0	0	0	0	0	0	0	0.14	0	0	0	0	0	0	0	0	0	0	0	0	0	0	0	0.19	0.14	0	0	0	0	0	0
7283	TUBG1	22.54	74.65	31.94	52.3	35.88	80.82	33.37	96.21	63.44	125.17	55.27	34.86	25.83	53.33	38.9	53.97	58.92	59.43	34.26	49.24	61.75	34.63	25.59	24.61	36.75	67.06	30.71	43.04	34.77	35.61	28	82.23	39.83	26.46	33.24	69.14	20.6	78.13	31.59	38.95	43.19	41.01	32.08	70.81	23.08	66.88	24.08	71.32
8818	DPM2	57.82	89.32	61.43	102.62	55.37	157.18	40.09	142.91	98.38	146.37	89.75	76.68	39.09	138.59	58.03	84.22	58.67	68.7	37.99	80.94	85.68	111.76	31.64	39.99	47.88	115.25	33.93	136.3	43.64	31.63	83.15	64.28	30.92	61.31	53.06	54.04	34.87	97.75	33.65	38.73	52.13	45.15	61.25	91.49	56.4	84.92	40.03	67.73
10263	CDK2AP2	59.22	94.31	53.01	65.93	58.95	67.15	60.02	123.49	54.41	59.14	88.54	52.89	44.49	80.3	50.65	57.58	89.38	126.63	56.95	81.89	65.22	66.57	46.68	36.02	75.4	60.83	67.67	48.6	57.62	45.81	70.68	100.78	39.6	44.54	44.91	205.06	44.05	121.06	56.43	55.35	62.8	77.56	52.02	43.8	37.69	26.34	66.5	47.21
4680	CEACAM6	245.02	156.37	281.09	25.74	286.62	0	0.35	294.76	26.76	0.95	260.02	13.86	41.63	9.53	136.89	22.77	47.53	48.46	0.7	0.86	67.89	3.63	0	0.85	0.18	4.18	0.49	21.7	199.1	0.98	0	409.09	101.76	13.48	131.14	67.33	349.67	5.33	0.69	4.49	27.9	0.7	569.1	15.06	14.6	15.79	0	171.85
8290	H3-4	0.94	3.23	0	1.07	0.82	3.12	2.74	2.59	1.02	1.77	6.14	1.25	0	0	2.33	1.12	2.61	0	0.87	2.73	4.62	3.9	2.42	0	2.79	0	1.25	0	0	0	2.62	0.86	2.05	2.65	0.36	1.31	0	4.55	0.9	1.31	1.27	0.92	0	0	0	1.28	1.31	3.01
57215	THAP11	36.47	44.6	34.38	32.7	30.96	29.8	44.3	60.28	53.18	48.37	37.12	38.53	30.49	45.25	31.84	39.8	35.31	50.63	59.73	48.23	50.72	36.24	47.04	32.09	41.16	39.36	48.13	57.05	25.6	52.59	35.2	31.05	24.16	35.85	24.81	36.43	17.03	46.25	45.84	33.4	37.85	43.81	23.33	39.75	29.17	20.95	28.78	47.08
11284	PNKP	39.02	67.78	40.08	52.93	38.17	53.19	26.58	28.3	56.63	59.6	52.81	40.13	39.14	49.87	38.13	37.63	41.62	62.86	31.28	41.64	64.75	37.56	40.34	69.35	36.44	80.68	37.4	68.91	30.01	31.15	78.79	62.21	33.08	83.01	51.52	60.63	64.62	54.06	28	50.79	83.65	38.38	67.02	36.72	52.37	92.86	48.35	58.52
114824	PNMA5	1.12	0.72	0.52	0	0.75	0	0.14	0	0	0.13	1.71	0.19	0.37	0.13	0.86	0.34	10.94	0.52	0.13	0	0.47	0.4	0.37	0.21	0	0	0.76	0.18	1.51	0.39	0	0.92	0	0.81	0	0	2.43	0.17	0.14	0	0.58	0.14	0.14	0.92	0.28	0.57	0	0.61
65010	SLC26A6	10.53	20.4	7.96	30.08	9.05	24.35	9.89	12.03	17.66	27.66	10.05	10.69	10	22.45	9.34	16.65	13.62	24.16	7.64	12.52	15.39	11.94	10.86	15.52	11.55	31.95	8.54	17.64	9.12	11.95	11.84	14.93	10.77	16.87	15.3	19.36	7.49	20.03	6.68	14.45	14.04	11.43	22.67	22.16	10.97	63.68	18.06	22.91
51530	ZC3HC1	18.44	25.02	18.93	25.83	17.27	28.35	15.34	15.13	24.47	27.82	25.41	31.51	23.82	21.87	20.36	33.6	34.99	24.31	20.79	19.05	24.96	30.72	24.21	28.73	19.18	33.02	30.5	30.07	24.11	25.75	37.3	25.59	18.8	33.79	19.05	26.37	19	38.86	20.16	26.53	26.86	23.14	17.41	13.68	21.48	39.34	30.81	25.51
51319	RSRC1	21.26	49.26	20.95	27.2	19.08	54.11	24.61	59.41	45.5	73.55	30.58	28.31	22.35	37.23	22.31	36.25	33.14	28.48	24.54	33.2	51.65	61.5	25.91	25.73	28.48	50.77	37.44	43.66	22.11	28.71	31.64	94.09	30.28	45.09	31.43	46.35	18.27	50.35	19.99	28.75	21.82	24.01	18.98	53.74	21.53	32.87	22.74	34.57
2633	GBP1	48.74	84.07	27	56.73	20.95	69.69	42.8	54.86	59.67	24.17	51.59	40.17	52.02	63.67	25.36	50.9	52.35	116.78	33.11	104.02	40.27	53.82	29.69	34.8	145.36	58.6	25.28	68.37	23.43	43.55	91.88	78.5	37.33	38.83	85.66	229.7	23.63	19.47	48.57	37.52	35.01	118.55	26.54	132.93	77.14	209.99	37.64	48.75
55858	TMEM165	82.01	101.51	67.91	98.86	89.08	116.65	99.91	139.99	92.85	94.4	99.26	129.78	109.03	107.63	87.35	120.57	82.2	97.35	89.65	115.36	111.1	124.52	91.54	98.89	100.68	87.24	69.38	80.09	67.85	90.04	59.03	182.74	97.94	77.96	100.02	121.95	93.26	70.16	118.18	127.08	84.45	123.53	69.1	88.73	79.14	52.13	98.43	90.46
1745	DLX1	0.84	0.95	0.17	4.96	0	4.21	0.81	2.1	1.03	5.68	0	1.1	0.8	0.38	0	1.59	1.85	0.5	1.06	0.6	0.51	0.58	0.27	0	0.83	2.44	0.83	2.64	0	0.28	0	0	0	21.69	0.45	1.16	0	8.53	0.2	0	0.28	0	0	1.22	0.4	6.72	0	2.03
10480	EIF3M	109.01	91.78	109.41	97.41	120.92	120.12	95.91	110.35	147.57	187.16	131.52	113.6	94.04	116.58	111.08	104.46	106.41	94.61	112.32	136.54	80.02	93.62	87.9	92.57	101.72	159.12	96.01	134.59	111.32	111.61	113.84	353.3	123.18	149.93	95.99	100.35	83.44	109.54	102.87	81.27	72.53	86.28	94.75	183.14	103.85	90.2	87.93	150.61
25992	SNED1	39.9	21.41	24.83	35.31	20.9	15.85	16.75	11.81	33.73	14.5	25.1	32.72	26.05	10.54	41.26	23.93	31.57	25	16.21	32.98	18.98	20.6	16.27	162.98	22	12.6	38.19	12.35	23.8	22.89	32.66	4.02	28.51	57.74	16.53	8.11	71.73	7.32	17.45	41.92	37.84	15.09	34.47	6.24	82.19	6.32	51.61	17.27
55256	ADI1	62.8	97	52.01	56.14	47.37	70.29	57.15	80.96	61.99	61.4	76.21	70.96	59.83	46.82	74.99	57.91	91.65	76.72	63.21	67.8	78.01	90.42	72.41	66.75	64.59	73.51	77.06	81.58	64.2	70.65	86.11	84.29	43.33	94.93	55.08	56.9	54.76	67.08	53.16	49.38	64.98	47.16	51.99	49.15	56.94	97.26	71.09	53.57
9580	SOX13	45.61	53.25	31.5	32.81	27.71	26.17	33.05	58.39	47.23	48.27	37.38	31.07	29.57	40.97	41.87	18.45	32.25	36.02	27.24	31.67	27.98	26.59	28.78	34.55	26.37	29.41	33.79	6.14	21.51	20.32	8.92	68.93	28.53	21.02	27.3	19.77	29.64	28.65	23.54	20.91	28.84	16.35	32.01	16.66	37.74	32.32	17.31	35.65
653282	CT47A7	0	0	0	0	0.03	0.95	0	0	0	0	0	0	0	0	0	0	0	0	0.07	0	0	0	0	0	0	0	0	0	0	0.05	0	0	0	0	0	0	0	0	0	0	0	0	0	0	0	0	0.07	0
128866	CHMP4B	129.05	133.89	117.72	101.53	120.08	114.27	129.12	146.52	96.6	82.89	104.55	102.29	110.87	119.29	124.95	91.63	90.16	117.1	142.06	116.16	74.29	97.39	124.16	88.11	131	93.83	123.01	100.11	111.53	106.21	73.54	87.59	110.28	66.43	98.86	91.62	104.38	141.75	133.19	106.09	118	146.31	95.48	94.6	85.76	258.34	118.9	105.34
23029	RBM34	82.75	103.26	66.69	115.07	74.16	106.96	63.06	72.38	106.15	92.55	111.03	109.05	102.74	80.63	93.81	112.57	149.62	123.21	67.15	82.12	123.25	123.42	107.41	135.9	64.5	159.73	104.88	128.03	101.71	108.71	161.8	103.15	83.03	137.49	115.45	106.72	132.08	135.08	55.75	104.06	149.75	71.51	103.88	78.44	79.5	198.16	118.8	135.21
154881	KCTD7	13.77	13.2	9.24	14.24	8.14	13.61	17.68	7.99	9.43	7.3	7.9	18.23	18.04	5.75	10.92	8.7	16.16	13.51	20.24	15.52	10.27	15.97	23.02	17.81	19.96	6.93	24.05	11.78	8.38	25.47	19.81	7.5	15.71	8.81	7.96	5.08	7.26	37.55	21.86	16.56	18.81	14.37	7.84	8.54	12.84	12.15	22.82	5.84
220134	SKA1	50.9	76.47	50.29	84.47	45.67	91	43.92	66.67	71.31	64.5	96.99	92.89	72.19	65.49	75.93	86.59	115.76	99.15	41.76	52.19	120.85	85.16	71.65	111.03	47.8	131.18	83.97	117.49	80.87	87.34	133.11	85.46	54.54	111.31	84.98	84.9	97.38	102.94	36.81	82.95	103.38	43.27	65.9	57.67	57.96	113.82	107.04	81.61
353137	LCE1F	0	0	0	13.59	0	0	0	0	0	0	0	0	0	0	0	11.07	0	0	0	0	0	0	0	0	0	0	0	0	0	0	0	0.73	0	0	0	1.11	0	0.97	0	0	0	0	0	0	0	2.17	0	0.85
23645	PPP1R15A	179.47	150.85	147.32	163.67	105.28	68.53	389.81	42.7	96.51	53.91	129.11	217.15	411.3	94.87	168.14	100.19	123.37	264.78	415.85	126.03	80.62	85.62	445.78	194.79	319.23	84.4	240.55	925.68	91.87	191.86	208.81	93.28	240.27	62.73	220.55	148.35	138.64	106.16	326.22	266.95	241.63	227.34	117.58	153.16	158.97	66.15	172.9	178.14
6391	SDHC	93.61	105.61	92.85	88.75	111.3	104.58	80.38	100.18	124.58	119.85	106.64	100.38	97.02	110.93	101	88.41	101.73	95.42	99.29	91.63	105.65	109.32	92.64	69.96	102.11	121.05	112.08	102.58	111.63	129.3	85.31	88.72	93.41	103.95	94.01	113.59	84.22	146.06	110.32	94.99	87.67	106.79	106.66	114.07	83.64	106.39	96.93	135.45
51287	COA4	53.84	126.34	55.18	50.18	52.44	59.43	54.61	94.24	129.47	205.59	61.23	69.12	59.82	329.06	52.9	49.62	75.76	53.29	55.83	57.96	65.75	61.97	54.34	65	54.36	109.13	64.9	69.62	53.7	66.45	85.42	38.9	47.31	59.19	52.59	41.45	72.78	53.55	67.25	47.49	62.63	61.64	50.14	65.08	50.35	71.84	59.83	72.19
63970	TP53AIP1	59.53	105.78	64.89	63.5	64.66	132.7	28.86	40.33	66.25	71.44	106.97	64.53	52.84	42.26	81.11	85.9	107.8	82.62	32.75	28.55	146.45	146.98	59.15	83.27	24.59	95.58	53.14	151.91	105.84	52.47	85.69	43.14	67.78	99.01	81.69	82.62	102.51	100.76	17.83	44.8	84.04	30.3	72.25	112.14	39.54	90.73	42.87	49.48
3792	KEL	1.85	2.41	1.19	0.64	2.75	0.41	0.26	1.93	2.23	0.25	2.09	2.44	1.15	0.81	2.28	0.94	2.35	1.58	0	1.26	3.55	0.52	2.37	4.38	0.78	1.12	0.99	1	1.39	0.51	20.95	0.34	0.57	1.11	2.54	0.52	0	0.32	0.5	0.52	1.21	0.52	0.52	0	1.53	0.73	0.78	0.56
441871	PRAMEF7	0	0	0	0	0.25	0	0	0	0	0	0	0	0	0	0	0	0.81	0	0	0	0.89	0.2	0	0	0	0	0	0	0	0	0	0	0	0	0	0	0	0	0	0	0	0	0	0	0	0	0	0
5862	RAB2A	50.43	49.19	51.96	36.7	60.65	56.19	47.47	124.45	37.47	32.23	58.82	44.04	38.62	77.33	52.5	42.3	41.12	47.04	45.25	50.79	46.66	67.07	40.5	42.08	55.31	25.62	46.61	44.75	46.48	46.2	21.7	51.75	55.05	30.33	48.68	31.48	34.54	39.38	49.05	36.09	29.03	43.9	55.87	34.78	33.82	73.1	37.65	47.94
93979	CPA5	0.74	0.56	0.22	0.28	0.21	0.27	0.24	0	0.27	0	0.27	0	0	0	0	0	0	0.2	0	0	0	0.34	0	0	0	0	0	1.22	0	0	0.25	0.22	0	0.34	0	0	0	0	0	0	0.33	0	0	0	0	0	0	0
9667	SAFB2	32.45	33.74	26.5	27.36	24.99	28.9	30.56	25.79	36.41	39.69	29.42	34.73	29.95	31.4	41.08	22.27	41.63	35.71	29.84	33.87	45.58	35.6	48	44.8	33.21	38.62	43.5	51.77	26.23	32.44	48.99	40.99	32.36	21.08	41.05	22.18	43.32	32.25	34.69	36.07	70.56	34.58	33.45	19.02	33.46	52.99	46.17	38.06
1649	DDIT3	14.54	29.02	20.11	33.43	16.22	11.47	44.68	24.26	17.41	27.28	19.15	37.05	42.84	37.5	32.05	8.02	11.49	21.2	34.14	32.55	15.26	19.73	48.09	18.99	38.45	35.4	42.89	40.09	14.2	33	20.17	34.5	35.64	25.5	15	18.72	13.18	11.29	26.77	30.22	43.22	33.49	19.11	30.9	30.11	44.99	29.56	33.19
2153	F5	15.51	20.01	10.53	16.49	11.73	22.24	8.09	12.58	18.68	12.84	15.18	18.59	16.39	13.02	16.53	18.91	28.3	22.98	7.3	17.86	25.9	26.51	15.34	29.59	11.18	26.35	15.65	23.36	12.75	19.42	32.01	16.49	16.33	28.9	17.07	11.95	20.27	23.46	7.82	17.37	23.9	9.37	13.27	12.76	12	24.42	17.65	15.78
113177	IZUMO4	4.64	6.34	7.43	1.75	4.95	1.71	3.68	2.83	10	10.88	5.03	4.77	1.98	3.26	9.97	4.52	3.57	3.64	4.3	0.99	4.62	2.85	6.58	2.95	2.35	2.93	1.36	11.09	6.5	2.79	10.33	14.96	1.12	10.13	6.62	1.43	8.73	4.98	3.94	0.71	6.92	3.02	10.26	6.57	3.49	14.36	5.73	2.2
119694	OR51F2	0.41	0	0	1.37	0	0	0	0	0	0	0	0	0	0	0	0	0	0	0	0	0	0	0	0	0	0	0	0	0	0	0	0	0	0	0	0	0	0	0	0	0	0	0	0	0	0	0	0
105377805	LOC105377805	0.32	0.12	0.1	0.36	0.18	0.25	0.1	0	0.46	0.1	0.11	0	0.27	0.46	0.24	0.25	0	0	1.18	0.1	0.18	0.15	0.68	0.3	0.84	0	1.26	0	0.11	0.57	0.14	0	0.23	0.15	0.11	0	0	0.38	0.3	0.59	0.57	0.72	0.31	0	0.31	0.14	0.86	0.11
23601	CLEC5A	1.98	0.45	1.85	3.17	1.22	1.74	0.13	0.6	2.19	2.09	2.28	1.56	1.68	4.03	1.12	4.64	1.82	8.27	0.61	3.18	2.84	4.22	0	0.75	0.52	1.31	0.7	2.63	1.49	1.42	0.36	2.41	1.58	2.77	0.98	5.49	2.78	0.79	1.89	1.44	1.38	1.16	1.3	5.96	1.4	1.07	0.18	1.68
8351	H3C4	231.9	410.92	323.14	202.64	396.44	406.75	27.01	764.22	383.81	581.89	307.15	130.79	31.01	329.2	123.3	329.04	307.02	214.21	32.33	245.88	289.76	206.06	34.87	80.55	49.89	241	28.22	276.16	296.23	47.72	426.41	1018.09	135.24	691.54	223.04	255.51	147.74	428.7	50	59.78	131.49	63.53	223.83	964.62	214.64	346.69	47.14	256.05
728279	KRTAP2-2	0	0	0	0.35	0	0.73	0	0	0	0	0	0	0	0	0	0	0	0	0	0	0	0	0	0	0	0	0	0	0	0	0	0	0	0	0	0	0	0	0	0	0	0	0	0	0	0	0	0
440435	GPR179	0.34	0.22	0.04	0.11	0	0.53	0.23	0.35	0.57	1.04	0.58	0.83	0.25	0.26	0.6	0.17	0.73	0.58	0.36	0.42	0.53	0.33	0.56	0.14	0.29	0.41	1.02	0.24	0.46	0.78	1.74	0.44	0.37	0.47	0.26	0	0.34	0.35	0.32	0.33	1.04	0.38	0.57	0	0.37	1.05	0.27	0.15
337985	KRTAP20-3	0	0	0	0	0	0	0	0	0	0	0	0	0	0	0	0	0	0	0	0	0	0	0	0	0	0	0	0	0	0	0	0	0	0	0	0	0	0	0	0	0	0	0	0	0	0	0	0
113791	PIK3IP1	40.97	62.32	67.3	31.26	35.14	29.94	43.5	54.96	80.4	27.62	30.86	34.85	33.46	25.49	40.2	20.53	46.98	54.22	48.5	54.96	45.84	55.08	33.18	69.02	39.05	51.22	41.08	45.91	30.67	36.16	121.27	41.25	38.49	24.82	25.68	26.27	24.63	10.43	35.32	22.91	31.94	30.49	36.99	30	50.25	26.15	34.04	22.59
2874	GPS2	75.43	91.36	65.8	76.35	64.76	91.46	97.09	112.77	87.05	96.64	66.53	91.9	65.41	71.96	73.31	64.52	93.45	97.57	70.2	94.91	52.62	61.44	76.77	68.82	95.27	91.56	67.18	97.41	53.83	67.1	83.99	70.35	75.34	58.1	43.88	62.85	41.33	111.34	75.36	72.02	81.83	69.11	52.7	72.24	57.77	69.82	70.53	73.2
284382	ACTL9	0	0	0	0	0	0	0	0	0	0	0	0	0	0	0	0	0	0	0	0	0	0	0	0	0	0	0	0	0	0	0	0	0	0	0	0	0	0	0	0	0	0	0	0	0	0	0	0
388969	C2orf68	30.51	42.29	40.91	29.09	32.29	35.51	21.51	49.66	55.27	55.45	43.28	35.75	29.47	39.44	37.37	28.07	37.22	36.87	28.72	41.68	31.52	39.28	32.19	35.11	30.67	48.43	34.8	45.85	38.06	41.32	52.79	40.97	30.8	99.02	27.32	27.14	50.53	35.88	31.64	22.4	40.93	26.38	42.26	19.65	32.22	34.62	28.65	33.72
107984138	LOC107984138	109.94	87.57	75.94	91.32	93.48	141.88	90.77	85.72	164.05	116.22	100.92	117.37	134.57	76.45	134.51	132.79	161.68	124	66.35	102.05	266.29	173.42	145.47	231.99	63.79	141.74	106.79	117.09	77.47	94.27	303.82	95.58	95.9	116.29	118.26	103.61	178.36	213.16	76.77	163.31	169.18	85.03	141.6	88.18	157.94	133.24	155.42	136.53
56907	SPIRE1	24.98	16.61	23.78	40.64	17.14	37.1	38.3	37.45	26.53	28.08	18.98	42.3	45.82	39.94	36.57	38.17	30.02	29.65	40.46	32.24	28.16	32.83	51.27	33.81	43.14	53.66	55.9	15.36	24.75	50.81	11.59	37.59	39.45	37.68	35.31	31.94	31.29	27.86	37.07	42.31	58.83	45.7	22	29.7	32.52	44.69	62.61	31.29
10322	SMYD5	20.4	29.27	19.79	22.83	18.92	23.87	16.32	36.88	42.4	58.96	28.41	23	15.5	31.58	17.36	14.41	26.73	25.54	20.35	23.72	28.41	25.7	19.19	17.62	18.39	32.7	17.21	31.14	15.16	19.97	24.38	37.59	12.26	47.84	20.87	40.47	15.62	34.81	18.97	18.76	22.89	19.93	14.02	17.93	17.33	33.79	14.4	22.27
91057	CCDC34	4.98	4.24	4.41	7.8	2.53	9.7	1.21	11.49	4.75	16.93	7.39	4.36	2.78	13.66	4.51	5.37	2.4	4.59	1.83	5.79	2.48	4.76	1.61	4.98	2.71	20.74	3.48	7.2	8.03	1.7	5.69	39.42	4.44	62.92	4.39	6.52	2.21	6.06	1.22	1.74	3.37	3.87	3.5	7.34	3.44	9.29	2.18	6.35
727830	SPATA31A3	0	0.12	0	0	0.09	0.12	0	0	0	0.3	0.47	0	0	0	0	0	0	0.13	0	0	0	0	0	0	0	0.31	0	0.14	0.34	0	0	3.24	0	0	0	0.15	0.15	0	0	0	0	0	0.11	0	0	0.22	0	0
51588	PIAS4	23.22	35.26	25.75	26.26	27.37	28.33	27.43	37.94	34.22	49.45	31.31	36.8	25.97	44.1	28.26	19.92	30.21	34.49	29.57	30.08	34.82	31.58	32.95	20.23	30.08	33.97	27.39	29.64	25.26	28.39	30.54	49.44	20.39	31.11	25.73	26.04	28.79	36.27	30.07	26.43	38.97	33.35	27.95	18.28	19.16	35.63	31.21	32.75
123876	ACSM2A	3.41	6.75	3.48	3.7	2.88	5.89	2.3	2.71	3.4	3.03	5.25	6.81	6.31	2.35	6.32	6.16	7.57	5.13	1.77	3.65	4.39	8.08	5.9	5.87	2.24	4.34	5.43	6.76	3.29	3.97	8	3.55	4.49	6.11	2.88	3.46	5.07	4.15	2.61	4.73	5.12	3.09	2.92	1.84	1.95	7.9	7.87	3.36
25793	FBXO7	75.84	87.02	75.94	78.41	60.49	94.3	72.29	109.18	85.17	78.48	56.58	78.81	75.07	90.48	79.76	64	85.25	69.99	97.79	96.23	61.1	82.22	85.91	70.36	81.31	93.19	86.86	55.98	58.37	92.05	78.11	87.58	71.76	75.05	63.56	79.62	57.44	70.35	83.11	68.62	65.55	93.53	65.82	93.7	114.92	111.73	79.74	53.66
5051	PAFAH2	35.91	54.01	33.4	39.47	29.1	37.91	27.88	36.03	40.23	37.9	42.87	49.03	42.5	32.02	46.41	37.91	59.62	48.7	29.23	30.27	57.01	50.61	43.82	50.6	27.12	60.21	49.63	58.26	47.89	42.63	63.53	37.96	29.77	49.85	46.01	39.59	47.79	52.11	27.32	38.99	58.59	30.44	44.33	30.85	28.82	50.05	51.99	32.24
6750	SST	0	0	0	0	0	0	2.29	0.72	0	0	0.86	1.04	0	0	0	1.88	2.18	0.95	8.77	3.8	0	0	0	0	1.56	0	0	0	0	0	0	0	0.86	0	0	0	0	0	3.77	4.37	0	0	3.11	0	0	0	0	0
64801	ARV1	19.91	22.56	16.39	22.81	18.63	24.16	20.04	20.56	22.78	27.73	20.31	24.26	23.77	18.18	24.91	20.87	29.06	20.05	22.96	25.39	25.16	24.51	24.51	21.78	22.77	31.19	24.82	32.9	24.04	25.25	24.59	37.83	24.01	21	15.49	12.87	20.67	28.24	21.08	14.79	16.31	20.9	18.82	21.37	15.75	28.23	24.39	22.39
8673	VAMP8	170.59	176.98	222.55	96.32	218.5	128.19	18.25	172.91	186.72	228.66	239.69	72.97	35.73	150.82	100.08	99.65	128.51	135.32	16.83	114.54	142.91	132.42	11.67	69.11	33.17	142.29	25.89	164.98	227.45	31.19	105.66	171.45	70.82	95.12	139.04	154.12	103.74	106.55	22.69	31.3	41.47	71.04	196.91	90.61	86.53	91.79	32.03	188.24
9318	COPS2	26	17.45	17.12	19.66	24.29	38.44	29.37	29.32	24.68	32.04	22.61	26.91	22.97	21.66	23.52	22.54	27.11	20.82	34.05	29.73	20.93	26.47	26.91	19.91	35.77	18.95	26.43	23.21	20.32	27.96	23.58	25.64	38.27	18.54	27.47	18.66	18.43	19.49	34.15	27.47	19.82	33.14	21.25	18.54	22.42	29.64	24.73	36.8
9937	DCLRE1A	6.1	7.76	4.05	3.78	5.64	6.19	4.76	23.11	10.3	12.75	4.54	7.4	5.5	7.75	5.8	5.47	5.95	7.67	7.6	6.66	5.25	9.38	4.03	2.85	6.82	8.03	6.62	5.3	4	8.07	7.84	22.67	5.47	12.42	5.26	6.38	3.69	6.52	7.36	5.51	4.52	4.4	4.84	8.45	5.7	7.09	5	4.9
26341	OR5H1	0	0	0	0	0	0	0	0	0	0	0	0	0.32	0	0	0	0	0	0	0	0	0	0	0	0	0	0	0	0	0	0	0	0	0	0	0	0	0	0	0	0	0	0	0	0	0	0	0
4584	MUC3A	0.2	0.27	0.14	1.02	0.07	0.52	0.53	0.11	1.02	0.15	0.09	0.68	0.55	0.71	0	0.28	1.09	0.76	0.22	0.83	2.17	0.38	0.4	2.14	0.93	0.67	0.57	0.25	0.12	0.48	1.53	1.11	0.3	0.39	0.38	0.27	0.17	0.38	0.41	1.42	0.84	0.58	39.49	0.75	0.3	0.27	2.18	1.05
7153	TOP2A	14.21	43.59	15.38	32.19	22.6	76.47	1.76	114.74	112.28	185.24	31.4	18.87	6.1	68.96	9.83	38.92	46.19	40.2	1.08	28.51	45.55	37.76	1.1	8.02	4.2	64.98	0.41	58.63	19.97	3.09	40.67	163.87	8.59	115.67	34.37	43.17	13.09	76.55	1.39	3.68	6.69	4.5	14.81	60.37	4.83	81.2	2.71	71.23
745	MYRF	2.78	6.36	6.84	1.72	2.39	2.98	1.94	4.61	3.14	3.15	5.69	5.2	1.46	18.59	2.53	2.93	1.37	2.28	2.71	1.86	4.66	2.2	3.07	0.99	1.52	2.92	3.57	5.39	4.08	1.52	4.23	13.23	3.03	11	5.36	1.22	6.98	3.54	2.28	1.9	3.43	2.82	87.7	1.97	2.09	1.95	2.04	8.73
8505	PARG	35.17	25.15	24.29	36.3	24.95	30.09	27.39	41.75	36.77	33.96	24.72	31.92	32.49	24.88	31.97	26.66	33.98	37.86	41.76	32.8	46.15	42.48	36.09	32.85	40.28	39.96	33.65	37.06	26.71	38.96	42.06	40.1	34.32	50.58	29.21	30.3	39.46	34.89	32.16	31.71	41.81	29.91	39.38	28.64	31.24	31.99	30.3	28.76
10260	DENND4A	32.37	33.33	22.34	28.88	24.88	33.78	34.29	41.31	46.79	40.08	29.97	40.6	47.2	21.4	33.92	26.13	49.1	31.32	26.66	41.71	35.03	41.71	36.67	64.53	41.89	31.05	36.51	36.77	26.04	36.48	71.65	22.93	45.21	31.96	29.29	19.75	35.11	24.73	41.41	43.19	41.89	43.32	24.89	18.49	31.18	41.57	41.7	30.68
386617	KCTD8	0.87	0	0.11	1.95	0.9	0.38	7.36	0.48	0.56	0	0.75	3.2	3.76	0.62	1.49	0.29	0.34	0.62	5.77	1.17	0	1.91	10.6	0.52	5.12	0.49	6.63	0	0.73	4.68	0.72	0.16	1.19	0.24	2.77	0	0.73	1.88	7.1	5.99	2.79	2.03	3.07	0	0.17	0	6.24	0.92
54331	GNG2	21.03	16.93	23.37	16.58	15.98	15.56	31.07	11.03	26.6	6.69	9.12	24.57	35.69	8.13	28.58	14.89	22.05	20.81	33.76	44.11	17.97	21.98	21.14	27.27	37.54	3.75	22.82	5.83	8.8	21.64	68.92	7.39	29.42	6.41	10.35	4.03	7.98	5.59	29.59	19.72	16.33	34.73	9.18	5.92	29.82	3.44	21.96	4.08
79161	TMEM243	16.72	29.79	28.04	20.55	24.6	23.9	13.86	26.95	33.17	26.05	12.44	18.59	12.94	8.25	18.99	15.08	44.46	40.96	10.27	28.7	31.15	23.31	9.23	43.64	12.78	21.62	14.66	57.17	21.66	17.66	84.45	17.49	15.33	17.15	10.72	19.86	11.07	9.79	12.48	21.04	17.8	15.17	26.77	19.01	23.47	27.65	12.78	16.44
440400	RNASEK	133.53	157.53	209.74	203.66	185.05	232.88	136.33	169.43	183.75	251.22	150.41	144.33	156.55	208.69	182.6	194.98	186.94	261.55	153.6	250.67	119.57	148.27	156.58	212.67	198.52	187.94	116.18	83.37	131.28	143.01	150.68	189.07	110.8	145.93	137.83	146.65	121.44	215.62	155.59	122.53	114.04	186.37	119.48	182.98	147.42	99.36	157.27	161.17
92745	SLC38A5	9.82	18.31	18.54	36.21	8.59	15.06	10.74	7.18	12.28	6.33	30.12	22.35	6.6	97.88	13	31.02	14.54	55.67	7.22	16.35	38.58	11.37	9.28	23.9	12.7	98.46	6.69	53.51	12.99	7.57	28.85	16.53	12.82	8.03	29.54	12.39	15.29	17.6	6.57	15.33	24.98	13.42	11.93	73.91	12.78	5.8	12.05	9.39
57035	RSRP1	71.68	68.06	65.64	82.61	52.96	58.26	40.54	45.67	59.05	38.87	47.37	55.82	51.4	52.38	68.24	40.68	50.88	67.15	49.49	58.61	79.48	59.79	63.43	102.47	55.35	60.9	66.68	99.86	82.29	72.62	112.69	51.87	59.46	41.99	66.46	29.86	93.16	49.05	48.28	82.26	88.72	46.18	146.66	58.51	106.61	54.86	72.47	65.84
56934	CA10	0.46	0.35	0.14	0	0.66	0	0	0.25	0	0	0.17	0.37	0	0	0.34	0	0.58	0	0	0.27	0.75	0	0	0.4	0.15	0	0	0	0.16	0	0	0	0.17	0.21	0	0	0.43	0	0	0	0.2	0	0.3	0	0.41	0	0	0
57132	CHMP1B	101.44	114.04	79.64	95.68	77.62	102.02	80.97	106.66	121.51	130.42	89.89	123.6	152.6	136.06	115.21	112.68	139.04	99.46	86.08	97.12	110.71	106.49	105.46	170.86	101.45	129.95	96.3	137.76	92.56	90.7	102.95	93.41	86.65	104.82	141.83	105.48	99.91	110.13	93.61	123.07	97.71	95.52	99.68	96.24	97.4	155.23	127.42	135.06
3557	IL1RN	948.63	290.22	1156.6	171.12	1439.98	25.18	12.35	35.7	69.6	78.34	1119.58	88.97	23.25	72.27	495.24	141	213.22	142.73	5.17	24.86	373.3	18.83	2.44	8.16	14.74	41.64	4.31	238	1476.09	9.51	8.28	107.97	569.68	79.22	1501.26	89.24	1738.02	107.05	3.11	14.3	125.1	10.88	1148.68	73.85	37.25	20.21	4.52	530.14
728588	MS4A18	0.14	0	0.36	0	0	0	0	0	0	0	0	0	0	0	0	0	0.19	0	0	0	0	0	0	0	0	0	0.18	0	0	0	0	0	0	0	0	0	0	0	0	0	0	0	0	0	0	0.28	0	0
8643	PTCH2	3.35	3.82	3.48	6.07	3	2.23	9.82	2.97	2.74	1.14	3	5.94	8.54	1.37	7.51	1.81	2.58	2.44	9.23	9.46	2.36	6.97	10.2	13.59	8	3.47	7.51	7.61	2.88	11.88	5.75	1.41	6.29	246.34	4.37	0.14	3.42	1.12	6.49	7.56	8.58	2.88	3.91	1.1	6.66	5.52	9.02	3.48
219537	SMTNL1	4.4	12.87	2.23	2.49	1.67	2.13	1.6	4.03	5.06	1.8	2.98	3.27	1.76	3.23	12.57	2.62	2.28	4.3	2.04	2.39	5.73	6.83	0.47	5.12	3.53	3.52	2.91	7.31	3.47	2.98	16.79	8.3	2.4	4.63	1.47	2.67	3.11	1	0.53	0.76	2.96	2.42	2.17	4.09	1.06	5.96	1.15	1.76
253017	TECRL	1.99	2.23	2.1	0.99	1.07	2.59	1	0.63	2.03	1.81	2.04	2.41	2.46	2.06	7.75	3.21	2.27	2.19	0.98	1.86	2.08	4.15	1.97	3.43	1.84	3.08	1.82	2.8	1.6	3.27	3.79	2.14	3.87	3.28	1.81	0.95	1.74	1.8	1.42	2.39	2.15	1.55	1.78	0.09	1.81	2.52	3.51	0.97
1831	TSC22D3	308.24	249.65	271.83	139.11	124.74	80.69	206.36	230.91	320.14	124.49	159.69	242.5	168.18	53.93	259.55	110.35	364.43	237.26	284.24	239.4	208	181.5	218.82	654.1	273.54	49.93	315.43	126.45	136.48	145.63	152.92	53.19	315.73	48.08	134.96	146.24	97.51	41.9	278.11	239.34	213.37	205.46	173.51	103.37	241.73	50.59	161.17	103.43
2932	GSK3B	33.41	54.98	28.68	44.22	32.81	60.32	33.26	56.71	48.97	65.65	41.82	42.08	29.25	53.64	37.54	61.49	46.45	45.37	33.25	40.6	39.33	44.37	34.47	32.37	34.63	32.06	32.4	45.92	32.02	26.93	35.27	41.46	31.36	61.87	31.65	34.88	23.73	48.98	29.9	32.92	30.35	27.97	31.39	28.83	30.75	43.47	28.93	45.55
1668	DEFA3	0.99	0	0	0	0	0	0	0	1.07	0.93	0	0	0	0	0	1.18	0	0	0.92	0.95	0	0	0	1.42	0	0	1.31	3.76	0	0	0	0	2.16	0	4.23	0	1.4	1.19	0	4.11	0	3.87	0	0	0	0	0	2.11
8915	BCL10	36.73	38.79	37.51	25.54	45.51	33.64	20.72	45.26	46.89	29.68	53.7	30.37	26.08	58.94	34.01	36.3	43.48	36.38	18.37	31.41	46.45	31.88	21.25	35.48	22.31	44.88	27.16	102.24	35.58	22.52	44.1	34.42	30.25	29.72	39.61	38.97	41.22	35.27	20.74	24.49	21.67	27.52	41.07	54.01	38.47	61.52	20.37	44.48
2559	GABRA6	0	0	0	0	0	0	0	0	0	0	0	0	0	0	0	0	0	0	0	0	0	0	0	0	0	0	0	0	0	0	0	0	0	0	0	0	0	0	0	0	0	0	0	0	0	0	0	0
51738	GHRL	8.52	12.26	7.12	9.91	6.86	9.75	9.03	5.62	11.23	6.27	17.92	13.87	6.17	6.21	13.93	4.42	5.29	17.46	4.66	6.85	15.75	14.83	12.66	15.48	5.42	10.71	13.97	15.23	12.5	11.52	33.41	6.44	8.9	3.66	4.59	8.59	27.59	8.4	4.21	5.42	14.34	5.49	73.03	4.35	7.55	15.99	9.88	6.61
28977	MRPL42	34.02	51.43	27.54	38.33	27.27	41.72	29.24	29.46	35.92	32.63	43.89	48.61	40.92	31.46	40.31	38.83	54.31	42.81	30.41	29.5	55.1	53.64	40.47	55.75	28.59	60.35	46.32	54.73	40.53	49.45	58.32	36.62	34.71	48.62	39.32	37.48	48.44	44.1	27.13	40.91	52.52	29.97	41.28	31.75	31.75	80.09	55.95	36.95
84649	DGAT2	9.9	15.46	22.54	7.08	16.69	15.38	3.64	8.9	6.91	1.76	23.98	3.58	3.82	23.94	9.31	6.66	3.76	8.97	3.29	4.5	10.75	17.01	2.2	8.98	1.66	7.69	1.73	1.42	10.62	1.98	5.96	5.84	7.06	8.65	8.79	10.62	10.91	2.57	0.6	1.45	4.42	3.27	12.14	19.84	3.25	8.09	1.88	16.5
57184	FAM219B	56.2	43.86	48.62	44.11	54.08	58.42	48.08	44.55	39.95	30.29	53.69	62.45	54.67	27.74	60.74	39.41	50.83	39.94	61.17	47.96	47.01	47.47	61.39	44.96	48.77	35.1	72.13	52.71	77.51	62.79	50.4	23.79	52.01	47.8	47.06	26.37	98.32	46.92	55.42	57.2	68.09	60.44	53.8	21.32	41.43	43.13	65.24	36.03
2852	GPER1	9.33	10	11.13	6.28	9.67	20.08	14.78	4.59	7.29	7.47	6.42	8.68	9.22	15.13	11.98	5.9	12.96	12.56	13.22	9.6	17.63	14.03	9.78	12.36	9.35	9.72	13.38	18.88	5.22	8.59	11.88	5.68	9.28	7.12	7.43	6.15	8.31	13.93	8.53	7.13	15.77	8.22	14.93	8.75	10.99	11.39	6.44	7.06
6723	SRM	66.89	101.91	89.38	117.62	84.78	113.74	84.41	158.92	107.58	121.94	108.47	110.11	86.54	98.26	77.97	139.67	152.08	189.42	70.93	127.77	114.86	102.47	78.83	125.33	81.34	134.26	79.66	144.16	73.09	73.06	141.45	96.2	66.92	79.12	84.08	154.33	59.89	89.25	70.05	102.6	85.45	76.73	64.25	93.98	81.9	165.91	94.68	109.23
84079	ANKRD27	32.68	28.78	30.39	23.4	29.32	30.8	38.39	22.55	30.98	28.45	25.59	36.33	27.54	34.86	27.47	23.15	19.85	27.24	44.93	34.62	33.03	32.12	36.9	26.77	39.49	39.08	45.73	27.39	23.76	44.94	29.59	32.34	38.55	28.28	27.81	42.41	28.1	34.93	44.76	35.57	41.37	43.71	27.77	31.17	31.52	54.99	32.67	30.35
14	AAMP	59.17	72.55	64.68	55.86	65.46	69.97	53.3	137.34	54.55	42.17	78.14	53.17	47.66	64.15	59.8	51.11	51.95	68.23	67.48	56.57	53.88	50.87	48.93	42.09	50.66	88.15	59.28	92.04	64.71	54	42.14	64.96	53.27	109.39	83.4	77.85	50.06	80.17	62.66	58.54	58.71	63.43	60.17	51.41	67.64	64.82	61.8	68
390323	OR6C75	0	0	0	0	0	0	0	0	0	0.46	0	0	0	0	0	0	0	0	0	0	0	0	0	0	0	0	0	0	0	0	0	0.45	0	0	0	0	0	0	0	0	0	0	0	0	0	0	0	0
84319	CMSS1	22.66	35.92	17.57	28.37	21.25	37.33	19.6	41.9	41.67	87.27	30.96	33.11	31.57	37.84	29.4	35.23	46.94	36.53	20.65	18.8	30.76	37.48	32.34	33.63	20.67	38.36	33.67	37.82	23.71	33.9	43.34	39.47	24.72	48.65	21.49	33.47	31.73	35.92	21.7	25.74	35.5	17.76	19.83	18.9	16.1	42.54	31.36	31.55
60680	CELF5	0.42	0	0.21	0.47	0	0	0.17	0.26	0.45	0.13	0.22	0.18	0.37	0.48	0.17	0	0.74	0.57	0.12	0.23	0.51	0.58	0	0.39	0.41	0	0.37	0.22	0.64	0.38	0.34	0.25	0.3	2.9	0.3	0	0.46	0.17	0	0.66	0.37	0	0.71	0.3	0.13	0.95	0	0
5469	MED1	22.89	33.21	24.24	27.49	23.81	35.77	23.88	34.35	34.64	36.74	25.16	30.43	24.13	41.5	24.39	25.23	32.44	24.38	26.32	38.36	29.19	32.83	24.47	28.49	29.89	36.18	28.8	22.92	17.33	28.95	38.51	30.8	21.75	30.91	23.45	21.52	19.41	38.88	28.69	24.45	23.06	28.06	15.73	27.22	22.46	34.67	24.03	28.77
23589	CARHSP1	70.46	58.73	87.65	72.07	71.48	60.07	37.08	65.51	71.91	73.79	80.89	47.1	50.62	55.65	68.82	134.66	70.61	62.7	33.5	54.95	116.16	52.24	34.09	54.51	31.85	45.18	47.13	82.53	73.98	38.15	57.22	62.24	47.98	76.99	49.92	67.55	84.49	88.41	33.74	32.59	41.75	38.67	91.18	116.87	49.96	35.25	51.06	65.26
25847	ANAPC13	44.01	39.43	24.76	51.47	33.41	72.43	43.3	61.9	40.78	69.56	27.27	60.21	47.18	57.45	42.67	46.67	41.27	46.22	50.57	62.86	30.78	36.3	32.79	38.81	57.26	35.7	42.08	35.79	19.16	51.53	29.42	63.9	35.09	34.17	30.67	28.33	21.61	40.79	44.63	37.56	21.09	56.43	24.37	37.56	53.15	26.59	50.18	40.98
3996	LLGL1	59.67	70.18	66.24	77.55	56.77	98.25	65.91	65.47	68.48	89.51	85.83	76.51	69.27	81.84	70.29	87.97	83.95	80.23	67.17	58.79	72.24	72.84	72.18	79.5	55.97	111.9	65.85	77.41	68.36	74.29	80.37	53.85	61.74	128.58	68.5	101.26	77.14	106.35	54.94	69.68	91.95	61.6	71.7	80.08	69.09	125	87.18	75.43
7979	SEM1	27.47	30.2	18.55	19.94	30.64	41.15	28.45	51.22	38.6	52.73	19.15	34.99	20.05	16.82	18.16	34.95	47.98	18.84	22.71	34.98	32.42	24.35	22.67	8.43	37.76	20.89	25.94	44.68	25.79	18.57	17.68	63.64	34.6	16.51	25.17	34	24.9	59.21	10.3	23.1	36.86	17.62	20.28	31.26	22.74	26.55	15.51	22.97
114792	KLHL32	14.17	17.56	12.36	19.44	10.35	20.65	12.46	11.36	17.89	13.3	22.58	24.64	21.28	12.88	18.58	21.08	29.81	22.41	10.67	11.29	24.67	28.04	19.16	26.38	11.77	30.29	20.2	25.83	19.97	21.09	32.79	16.24	15.34	29.47	22.99	19.54	23.18	23.11	10	19.49	28.81	12.39	16.87	13.6	16.03	25	22.81	17.55
204219	CERS3	24.68	31.22	30.93	17.03	42.37	50.46	0.45	15.7	12.13	6.28	43.14	19.1	0	5.95	22.84	44.88	27.66	18.88	0.43	2.79	42.79	16.94	0.9	0	0.11	9.63	0.86	39.89	42.81	0.32	1.04	15.79	15.75	2.95	33.15	23.41	29.9	30.44	0.11	0.97	6.52	0.23	35.21	19.17	2.68	28.02	0.32	42.96
644019	CBWD6	31.62	42.81	27.42	36.16	17.02	28.35	16.85	29.65	38.63	31.9	29.31	41.48	39.62	32.76	40.26	32.28	42.19	22.1	17.7	24.43	45.21	49.12	25.87	42.84	19.9	58.64	25.35	47.31	33.13	27.61	56.86	33.26	35.97	36.77	58.58	44.9	67.22	56.28	19.75	29.58	54.33	26.8	28.79	31.76	27.75	69.21	36.07	24.75
7832	BTG2	366.5	196.22	336.94	461.02	153.14	177.78	2211.35	163.64	294.1	142.24	223.1	1388.28	1963.38	138.7	785.69	161.83	525.84	245	1812.63	765.01	149.87	560.5	2802.23	551.97	1358.11	121.58	965.13	145.76	105.07	570.8	241.1	50.91	1218.98	78.37	585.89	72.91	252.14	45.24	2947.05	1123.7	701.21	735.58	207.07	72.28	1160.14	255.59	1200.26	219.15
403273	OR5H14	0	0	0	0	0	0	0	0	0	0	0	0	0	0	0	0	0	0	0	0	0	0.69	0	0	0	0	0	0.63	0	0	0	0	0	0	0	0	0	0	0	0	0	0	0	0	0	0	0.69	0.53
107984043	LOC107984043	3.81	5.35	5.28	4.31	3.06	0.97	6.24	5.11	4.44	4.12	4.77	6.59	5.62	3.44	5.43	4.18	6.08	4.58	6.52	5.94	5.03	3.64	4.9	5.04	7.82	5.83	5.04	3.34	3.39	5.55	14.65	4.56	4.47	4.53	4.08	3.66	2.9	2.13	1.68	4.07	3.94	6.31	2.6	0	3.4	1.99	5.3	3.44
105370092	LOC105370092	0.18	0.21	0.41	0.62	0	0	0	0	0.3	0.09	0	0	0.12	0.33	0.11	0.22	0.13	0.11	0.09	0.09	0.45	0.38	0	0.92	0	0.29	0	0.12	0.19	0	0.38	0.08	0.1	1.03	0	0.13	0.13	0.33	0.09	0.38	0.37	0	0.09	0.2	0	0	0.13	0.78
399664	MEX3D	47.19	74.25	38.35	72.94	49.17	88.8	44.89	132.86	53.49	90.54	45.04	41.38	41.03	120.76	39.17	58.95	50.34	64.47	63.08	55.93	60.64	49.33	43.92	40.81	43.45	156.79	51.94	83.21	36.75	38.9	12.19	89	39.2	126.91	67.79	89.95	26.32	133.14	53.94	67.42	48.35	49.78	38.17	66.01	39.36	52.2	49.24	67.53
448834	KPRP	3.73	2.03	24.97	4.01	47.96	0.2	0	0.33	0.77	0.17	22.36	1.17	0	0.16	25.66	38.63	0.25	0.21	0	0	0.44	0.25	0	0.25	0	0.25	0.24	0.45	52.7	0.24	0.25	2.44	55.95	1.75	28.89	0.74	34.59	0.86	0	0.49	0.24	0	7.35	2.64	0.17	1.44	0	1.7
55118	CRTAC1	23.18	0.57	8.72	1.54	17.49	3.42	5.26	1.69	11.25	8.7	5.16	3.25	0.87	8.38	11.73	2.04	3.16	2.55	6.29	4.95	1.5	3.68	2.25	8.11	3.9	1.75	4.79	0.47	26.41	3.18	2.32	0.46	6.66	2.18	1.94	0	21.09	3.38	2.34	3.55	4	2.21	17.96	0.48	8.88	3.37	2.52	3.13
29974	A1CF	0.85	0.7	0.64	1.3	0.56	1.19	0.86	0.75	1.2	0.72	1.44	1.65	0.96	1.07	1.51	0.98	1.15	1.58	0.5	0.71	1.59	1.01	1.06	1.48	0.56	1.56	1.53	2.16	1.23	1.11	2.18	1	0.74	1	1.15	1.08	1.41	1.72	0.48	0.81	1.58	0.61	1.02	0.55	0.59	1.05	1.02	0.45
1340	COX6B1	318.05	319.2	351.41	201.68	375.17	198.24	308.4	227.92	260.36	271.6	285.02	229.31	221.75	300.65	305.81	263.37	280.11	311.89	252.68	257.2	116.67	175.72	246.02	153.69	304.98	186.62	213.6	361.78	338.64	260.43	180.85	353.86	256.79	170.27	203.83	354.71	223.53	181.68	257.62	191.83	216.8	233.3	211.35	230.22	196.76	199.62	160.17	200.74
337977	KRTAP21-1	0	0	0	0	0	0	0.83	0	0	0	0	0	0	0	0	0	0	0	0	0	0	0	0	0	0	0	0	0	0	0	0	0	0	0	0	0	0	0	0	0	0	0	0	0	0	0	0	0
221960	CCZ1B	43.68	33.98	46.34	51.48	49.3	85.56	48.23	68.51	78.33	79.58	47.11	38.51	24.35	38	20.46	26.92	42.68	49.89	52.95	53.22	54.21	68.39	26.12	13.52	19.29	15.48	25.79	52.62	31.62	39.27	63.96	124.66	40.84	31.98	25.54	36.45	37.55	50.79	41.84	43.8	32.96	63.26	47.65	72.91	17.3	34.59	42.34	63.44
27097	TAF5L	28.51	32.01	18.73	24.16	22.97	29.78	25.75	37.18	25.35	29.09	27.21	31.82	26.68	36.33	24.8	21.3	26.46	24.02	28.38	34.21	32.31	33.34	28.6	29.97	28.54	20.73	30.03	23.99	15.23	21.09	31.15	33.61	26.27	28.24	24.72	15.32	19.29	25.95	33.19	32.09	27.29	31.63	20.13	20.86	25.22	34.92	30.37	24.32
220929	ZNF438	25.35	29.05	21.62	29.86	18.43	26.81	20.9	20.93	22.98	22.9	24.71	33.42	32.94	17.45	28.8	25.95	33.39	28.14	27.19	24.84	33.96	39.69	37.35	41.53	23.43	35.46	41.12	32.92	24.77	40	39.17	25.04	25.5	40.06	25.77	24.31	32.53	28.56	23.62	31.81	38.99	26.53	29.22	15.77	24.79	32.58	37.74	21.23
112267939	LOC112267939	16.22	19.63	21.51	11.95	20.19	30.88	21.73	27.34	24.43	0	25.93	31.43	25.32	19.93	21.28	21.27	12.35	26.53	18.46	35.93	24.12	40.87	18.05	39.54	14.52	35.72	28.27	31.52	28.3	32.92	61.63	8.96	12.58	38.88	1.6	0	7.74	13.17	12.55	23.3	2.67	20.75	13.35	2.99	12.12	35.59	30.89	4.04
6339	SCNN1D	4.84	3.51	3.7	8.45	4.07	3.56	8.65	2.55	4.76	7.84	12.57	5.43	7.5	4.24	4.53	29.46	5.07	4.05	7.34	4.53	27.13	5.46	13	6.72	5.79	6.46	7.57	15.23	4.01	8.93	4.48	2.01	3.04	9.06	5.81	1.63	5.59	11.52	7	5.08	8.47	2.72	8.67	24.32	5.25	6.16	4.69	15.93
29893	PSMC3IP	6.41	12.69	4.58	7.52	10.24	15.06	7.82	14.52	15.32	18.82	11.09	10.18	3.45	14	11.88	10.96	11.44	13.36	9.06	11.38	11.52	13.67	8.66	7.77	5.66	10.53	6.24	13.63	12.22	7.3	15.9	16.11	4.41	11.46	6.85	6.08	11.41	10.19	5.79	6.54	11.61	9.23	6.97	11.46	7.89	14.61	7.41	10.77
79781	IQCA1	2.66	0.4	0.26	6.19	0.79	2.52	0.44	1.14	1.36	2.16	1.08	0.56	1.45	10.58	2.1	9.63	5.23	1.91	0.99	1.31	6.15	3.78	0.55	4.8	0.69	35.69	0.94	0.45	2.42	2.15	0.49	6.39	1.39	32.1	0.65	0.79	2.75	7.05	1.08	4.17	3.56	1.04	1.39	4.53	2.4	8.39	2.46	6.03
51085	MLXIPL	9.57	2.98	2.17	6.02	2.16	1.91	1.35	0.79	5.25	3.65	3.06	6.61	3.55	2.8	9.08	1.92	3.98	1.76	3.28	2.45	2.73	2.25	2.62	8.31	4.27	4.34	8.8	4.72	2.91	4.27	2.38	2.75	6.45	15.22	4.05	2.54	6.87	3.03	4.95	5.98	5.11	1.21	8.29	0.93	8.6	7.34	5.88	2.43
81466	OR2L5	0	0	0	0.56	0	0.55	0	0.91	0.54	0	0	0	0	0	1.83	0.59	0	0	0	1.27	0	0	0.64	0	0	0	0	0	0	0	0.69	0.91	0	0.69	0	0	0	0	0	0	0	0	0.97	2.1	0	0	0	0
80179	MYO19	33.93	67.13	38.15	91.17	52.1	88.97	17.49	60.72	94.07	140.02	66.24	45.59	22.35	52.27	34.25	66.76	72.31	60.93	24.84	44.09	124.99	56.32	20.46	37.31	18.66	70.94	27.12	91.81	53.34	27.13	40.88	93.75	31.22	57.7	58.35	73.12	85.55	151.14	18.12	26.99	62.38	20.8	54.06	76.03	32.33	124.64	24.6	85.48
4176	MCM7	58.61	149.6	52.43	85.9	81.04	164.17	34.46	374.24	241.83	253.77	112.12	65.76	26.82	100.64	56.25	84.52	268.17	223.02	50.1	141.88	106	81.1	36.81	40.25	46.27	408.59	42.02	328.07	64.69	40.3	110.53	210.02	51.09	248.51	68.03	115.26	63.1	299.63	42.8	48.66	62.65	41.59	57.63	113.31	43.23	133.89	35.34	119.12
114793	FMNL2	22.98	19.4	14.14	27.7	10.4	46.16	21.36	32.41	29.6	41.52	16.09	23.9	22.82	20.31	19.14	36.13	27.61	39.81	16.75	33.99	60.84	43.16	22.03	25.73	24.83	78.27	24.64	49.51	11.04	23.79	17.84	44.48	23.49	71.4	20.9	45.68	19.23	31.36	22.13	27.74	28.61	22.19	26.52	53.62	25.2	89.95	18.84	65.85
1524	CX3CR1	2.74	3.94	4.67	1.46	3.25	3.68	1.25	2.77	2.49	1.48	3.75	2.28	3.13	0.65	3.02	0.51	4.78	1.38	4	5.69	1.76	4.37	0.92	2.48	3.27	2.45	2.48	0.36	1.97	3.7	2.6	0.26	2.04	0.61	1.54	1	3.45	0.17	1.79	1.8	2.13	1.69	4.11	0.61	4.73	0.2	2.6	3.53
51351	ZNF117	8.84	14.03	9.76	10.81	9.4	12.67	4.43	10.73	7.32	5.62	10.16	9.36	11.1	8.19	10.38	16.44	25.03	10.02	5.27	7.46	21.39	71.71	6.1	13.14	4.14	17.2	7.97	20.28	15.43	10.56	12.29	18.79	8.24	7.9	12.42	9.79	28.4	215.15	5.68	7.47	11.9	5.84	12.58	18.67	6.5	5.15	13.74	26.88
255411	TEX49	16.51	8.99	12.32	15.79	12	11.99	14.23	5.72	8.52	6.55	10.97	15.52	17.67	7.65	18.17	9.19	9.05	9.11	17.49	12.04	4.73	12.72	18.72	17.89	16.3	5.07	19.08	3.01	13.76	17.29	4.54	5.98	15.55	11.89	13.84	5.98	14.47	5.03	16.33	18.14	19.76	16.86	32.07	4.11	23.71	15.3	18.38	6.33
80772	CPTP	42.73	40.27	40.31	29.14	55.17	33.34	18.6	57.64	33.12	29.06	61.93	26.51	22.05	39.68	44.79	34.62	38.94	44.2	34.72	33.6	60.32	23.66	23.01	21.86	26.45	32.32	29.07	68.18	53.39	24.04	32.71	68.32	29.26	22.89	26.24	56.53	47.39	35.1	19.02	22.67	25.42	22.79	47.03	34.23	23.09	32.81	21.71	33.78
131583	FAM43A	55.02	40.75	38.18	49.64	26.08	65.74	49.76	16.37	48.76	77.71	38.75	48.33	53.44	27.13	28.52	87.08	35.28	37.27	44.38	55.49	71.69	62.78	22.03	29.03	48.98	46.91	37.69	9.15	22.07	25.88	42.08	28.12	29.35	20.09	31.69	51.71	21	28.59	37.63	39.49	27.79	41.29	23.03	33.44	43.84	13.63	22.24	59.31
128954	GAB4	1.03	0	0	0	0	0	0	0	0	0	0	0.91	0.44	0	0	0	0	0.46	0	0	0.23	0	0	0	0	0	0	0	0	0	0	2.99	0.75	0	0	0	0	0.46	0.33	0	0.26	0	0.34	0	0	0	0	0
529	ATP6V1E1	108.06	93.47	98.84	77.09	95.83	106.78	117.73	150.51	117.58	129.17	94.84	95.17	86.33	175.55	100.32	85.52	60.21	93.46	128.63	119.01	80.62	88.46	96.86	52.06	120.52	87.67	103.42	64.23	99.19	129.85	70.39	173.69	124.39	52.44	96.81	91.31	83.2	83.65	130.65	92.68	75.97	116.97	79.01	105.68	88.48	93.32	103.33	113.51
4059	BCAM	109.72	55.16	104.4	132.6	64.52	137.5	151.43	59.17	91.16	37.85	67.36	87.06	150.69	58.32	122.64	110.7	65.35	96.85	113.38	158.7	37.24	60.28	73.89	132.35	121.65	56.27	133.38	44.03	74.02	107.56	32.39	32.34	127.54	352.44	83.79	261.75	67.44	109.22	130.97	116.72	108.34	105.23	56.61	185.03	188.65	28.31	60.8	64
83468	GLT8D2	13.87	7.72	9.36	34.22	4.23	23.57	22.11	9.91	11.69	7.83	4.53	14.01	31.71	14.38	23.29	33.81	6.88	17.28	22.97	23.3	2.34	19.89	21.98	38.56	21.79	7.83	23.86	6.8	5.8	25.97	2.35	2.61	17.38	8.33	8.84	6.35	3.37	7.42	29.02	12.74	10.25	16.82	5.68	9.46	35.65	2.3	23.52	3.18
5364	PLXNB1	62.96	105.46	58.86	58.69	79.28	47.88	71.11	44.94	51.56	65.7	84.15	68.63	48.92	62.8	72.08	51.94	54.11	48.35	54.76	32.59	77.07	41.14	70.36	26.22	54.27	105.45	83.69	136.48	99.97	52.9	7.37	57.19	66.75	120.53	115.66	61.29	162.65	89.46	41.55	61.8	139.93	48.77	129.39	32.91	41.18	157.62	84.29	107.11
503542	SPRN	9.45	12.86	6.86	10.51	10.4	12.76	5.18	9.82	12.5	19.02	16.51	13.22	8.29	7.89	9.74	11.39	15.98	15.74	8.35	9.24	19.5	11.86	9.41	13.93	5.15	13.61	10.63	20.69	11.56	11.06	15.25	12.75	6.76	15.82	9.05	9.97	14.31	10.72	7	7.62	22.33	5.51	11.1	7.19	5.99	21.56	11.94	10.5
107985778	LOC107985778	0	0	0	0	0	0	0	0	0	0	0	0	0	0	0	0	0	0	0	0	0	0	0	0	0	0	0	0	0	0	0	0	0	0	0	0	0	0	0	0	0	0	0	0	0	0	0	0
23203	PMPCA	31.67	37.32	34.51	35.9	35.88	58.09	40.36	50.38	56.86	79.1	36.88	40.52	33.74	69.5	33.53	41.54	30.64	32.2	46.09	42.54	48.49	54.16	36.62	35.34	39.29	50.1	45.15	46.08	32.87	41.26	51.36	51.02	36.62	39.52	45.81	75.01	39.11	83.67	47.5	39.97	52.71	41.44	33.27	42.51	32.21	57.75	40.78	43.07
5626	PROP1	0.62	0.35	0.28	0	0.27	0.34	0	0	0.34	1.17	0.34	0	0.4	0	0.38	0	0.43	0.37	0	0	0	0	0	0	0	0	0	0	0.65	0	0	0	0.34	1.31	1.66	0	0.44	0	0	0	0	0	0	0	0	0.42	0	0
3597	IL13RA1	84.65	61.82	74.52	94.84	90.13	96.51	69.04	112.5	67.38	46.21	78.96	131.68	110.51	53.44	90.65	84.62	68.78	72.56	87.33	124.15	55.18	91.83	91.8	97.55	107.87	87.1	105.51	58.19	68.03	138.33	57.91	38.83	92.15	34.82	89.69	53.75	106.11	51.25	147.67	134.87	73.92	138.96	96.08	62.48	69.59	27.72	123.96	76.45
57082	KNL1	8.72	14.14	7.84	14.06	9.58	42.6	3.95	26.44	28.49	42.02	13.63	13.91	8.79	15.58	10.01	17.98	23.62	15.68	4.56	9.95	19.73	13.03	7.07	12.53	5.06	17.15	7.71	26.94	12.09	8.5	22.4	24.41	7.34	19.76	13.47	20.16	10.5	25.46	3.98	8.37	11.49	6.02	9.77	16.41	7.44	32.04	11.35	17.97
374928	ZNF773	28.45	40.39	26.09	32.24	22.22	38.09	24.23	26.08	35.04	31.33	37.87	49.5	41.1	28.26	41.3	42.27	58.53	39.95	24.63	24.89	44.4	44.69	46.41	51.03	24.7	66.52	51	46.24	41.12	57.07	75.79	25.79	31.59	68.62	40.54	40.42	60.24	45.8	26.89	44.18	55.57	29.89	39.63	21.57	32.16	63.93	52.63	36.48
6927	HNF1A	1.72	2.46	2.33	2.12	0.94	2.26	1.38	1.88	2	3.39	2.14	1.97	2.02	2.01	1.27	1.6	2.42	2.21	1.75	2.28	2.36	2.39	1.34	2.64	1.79	2.29	1.48	3.44	1.31	2.69	3.45	2.35	1.97	2.84	1.01	3.39	2.7	2.41	1.56	1.33	3.3	1.19	14.67	1.46	1.72	4.51	2.41	1.53
9938	ARHGAP25	10.87	24.6	29.24	15.5	18.57	21.92	11.72	15.68	42.55	13.22	17.29	20.06	13.11	7.82	12.08	10.01	44.19	44.84	12.17	46.72	38.64	24.84	7.88	59.37	11.97	19.42	14.14	21.06	10.46	10.42	154.34	14	11.72	8.38	8.9	13.27	8.32	4.65	8.46	16.32	13.33	16.98	9.77	11.05	24.8	14.34	9.62	8.72
440533	PSG8	0.97	0.96	0.49	0.41	0.23	0	0.31	0	0.68	0.21	0.93	0.33	0.43	0	1.49	0	3.24	0	0.46	0	0	0	0	0.73	0.27	0	0	0	0.42	0.67	0	0.41	0.34	0	1.26	1.84	0.35	0	0	0	2.48	0	0.94	1.27	0.7	0	0	0.82
8364	H4C3	149.71	210.21	161.53	142.51	185.7	252.65	84.91	509.98	315.71	377.8	257.56	112.78	82.19	190.96	105.35	189.57	283.85	285.12	67.59	112.08	89.35	197.92	57.18	85.02	80.59	122.97	60.53	125.23	157.41	95.34	298.5	394.53	136.1	439.03	72.76	111.5	61.06	186.7	82.67	78.85	129.52	101.54	82.81	368	106.38	172.48	56.68	105.34
9670	IPO13	21.14	32.57	24.93	38.72	30.22	48.31	29.5	47.39	22.57	27.27	39.12	26.26	26.71	25.01	33.87	32.61	36.19	44.11	37.76	30.13	47.25	36.93	31.27	23.19	34.01	40.12	36.36	72.78	23.55	33.55	18.61	84.27	23.77	13.53	28.08	51.92	23	30.79	31.87	26.1	34.67	30.75	20.24	35.15	22.2	70.05	28.55	40.45
143098	MPP7	71.46	68.77	81.01	52.08	86.08	48.25	89.35	75.12	46.3	43.44	80.79	97.74	83.07	40.75	83.84	43.95	65.98	50.81	95.53	53.81	75.12	70.92	103.79	51.6	104.43	54.76	98.71	47.32	96.07	125.34	56.63	40.43	108.42	55.31	95.82	47.48	113.91	50.07	111.07	80.49	90.88	105.44	80.68	38.8	51.88	46.7	85.46	71.2
3003	GZMK	4.23	17.24	6.26	0.68	2.62	6.01	0.29	17.17	8.17	1.42	5.57	3.59	2.7	0.55	2.24	0.36	10.86	16.69	3.08	9.61	3.33	11.67	0.39	9.52	1.49	4.29	3.6	1.53	1.59	0.41	38.14	1.1	1.32	1.27	0.97	1.68	0	1.09	1.44	1.26	2.84	3.25	0.89	1.93	7.01	2.05	0	0
7416	VDAC1	145.45	130.92	142.27	159.21	156.29	166.91	87.38	136.82	147	174.94	158.92	110.85	84.57	181.45	144.54	165.13	160	152.11	90.91	122.13	136.46	117.41	82.45	79.27	101.28	149.53	100.43	153.47	174.41	109.01	117.76	173.3	117.92	121.49	139.3	298.16	137.45	131.61	105.93	100.35	100.73	117.97	119.73	214.34	75.36	169.55	96.34	178.35
2532	ACKR1	160.63	33.42	185.46	82.07	65.84	36.34	265.07	42.29	171.05	33.47	80.54	148.56	332.94	0	123.37	35.29	104.33	42.89	149.49	255.02	25.06	87.49	49.48	178.85	254.8	7.98	158.75	11.68	100.94	262.72	102.44	3.3	167.92	11.83	57.1	1.67	96.88	4.36	230.33	122.94	74.9	71.79	19.37	5.12	200.18	1.09	39.02	17.09
11166	SOX21	14.4	22.71	29.21	5.88	29.33	17.25	0.15	49.43	13.25	24.11	34.71	13.15	0.2	45.44	14.79	4.19	8.89	4.78	0.14	9.02	4.31	0.63	0	0	0.15	8.77	0.2	12.85	28.56	0.62	0	22.17	5.84	16.03	12.34	3.61	13.03	22.38	0	1.49	3.12	0.15	23.87	4.56	1.48	36.51	0.21	18.64
83953	FCAMR	0.33	1.56	1.7	0	0.16	0	0	0	7.37	0.34	1.36	0.35	0	0	0	0	6.32	0.63	0	2.02	15.29	0	0.23	2.26	0	0	0	1.32	0.55	0	13.78	1.1	0	0	0.28	0.36	0	0	0	0	0	0	1.54	0	6.06	0.71	0	0.28
1673	DEFB4A	0	0	0	0	0	0	0	0	0	0	0	0	0	0	0	52.13	0	3.67	0	0	147.44	0	0	0	0	0	0	0	0	0	0	0	0	0	11.45	0	0	0	0	0	0	0	0	0	0	0	0	12.02
55966	AJAP1	2.33	0.41	2.26	16.48	4.35	13.61	0.51	0.33	5.96	11.65	1.6	0.37	1.95	0.17	1.89	19.7	2.48	3.79	1.85	3.97	41.72	1.83	2.09	4.6	2.48	1.78	1.07	19.5	4.46	0.73	2.24	0.82	2.39	1.67	0.38	1.99	4.63	15.91	1.37	3.04	3.21	0.7	0.39	42.41	1.21	0.24	0.75	7.02
54813	KLHL28	23.96	38.63	15.07	16.75	17.67	15.71	12.21	14.6	22.54	19.29	23.21	21.81	17.54	22.47	24.82	17.9	22.55	20.23	18.72	16.51	24.06	30.18	18.9	24.13	19.43	30.58	23.14	46.54	19.78	21.47	31.59	26.11	15.14	27.12	18.82	15.21	18.99	22.8	15.73	16.36	22.27	14.62	20.22	21.22	18.35	28.62	17.25	27.36
102724237	LOC102724237	0	0	0.11	0	0	0	0	0	0	0.12	0.13	0	0	0	0	0	0	0	0	0	0	0.17	0	0	0.12	0	0.33	0	0	0	0	0	0	0	0	0	0	0	0	0	0.17	0	0.12	0	0	0	0	0
89832	CHRFAM7A	6.86	6.83	6.36	8.66	4.54	9.8	4.22	17.65	7.62	6.62	6.64	11.3	10.71	5.42	8.84	9.3	12.85	9.46	5.19	5.24	9.49	8.67	12.28	13.19	4.38	9.97	8.05	8.77	8.49	8.54	17.1	5.59	5.76	17.87	6.9	5.38	7.15	6.94	5.08	5.7	7.82	6.46	10.08	4.58	9.55	11.99	8.54	8.78
51124	IER3IP1	9.6	11.15	9.06	9.37	10.01	12.95	6.82	19.28	9.72	9	9.54	14.99	7.16	14.15	10.94	14.27	14.05	13.06	6.2	15.54	9.64	14.73	6.27	8.75	6.97	9.3	6.47	13.55	8.02	8.85	8.74	17.57	10.55	10.83	9.01	9.99	5.7	8.8	7.76	6.05	7.83	8.64	8.45	8.26	8.59	6.81	9.4	12.11
54880	BCOR	32.26	38.07	33.36	27.81	25.75	25.75	40.55	37.44	24.15	15.53	28.1	27.69	31.37	21.16	22.19	19.1	32.29	25.67	21.83	38.12	24.39	25.08	23.18	20.07	31.67	30.05	28.4	28.94	27.66	24.51	45.77	27.44	27.37	45.69	22.18	13.1	32.12	12.42	27.16	29.18	30.82	23.34	24.34	13.84	17.55	17.3	32.79	20.58
389941	C1QL3	2.27	1.73	1.87	1.5	0.66	0	0.37	0.87	0.41	0	3.28	3.5	0.48	0.34	0.93	2.02	0.52	0.45	0.88	0.73	5.33	1.57	0.73	1.63	1.68	0.81	1.75	2.39	1.79	2.3	2.36	0.17	2.06	1.06	0.81	0	2.14	0.46	0.18	1.31	1.78	0.18	2.61	1.21	2.01	1.28	1.05	0.81
3673	ITGA2	35.32	33.55	38.6	52.91	42.72	67.41	16.08	47.81	72.79	74.37	43.08	32.19	17.06	66.07	37.1	26.73	46.95	40.2	17.04	24.72	38.89	46.95	21.97	15.89	19.1	96.73	19.82	54.07	53	21.8	13.89	58.42	33.99	89.5	54.84	28.39	49.24	40.59	14.99	21.93	27.8	15.3	35.82	58.68	11.14	83.46	19.69	39.6
6580	SLC22A1	4.68	8.18	3.39	5.44	6.46	5.88	1.96	7.33	9.44	8.92	6.7	4.45	4.68	9.23	6.37	7.55	12.8	11.49	2.31	2.37	14.42	10.63	2.47	5.72	2.25	11.12	4.46	8.68	11.18	2.73	7.37	7.27	4.08	12.36	6.68	7.13	15.04	12.43	1.9	1.99	6.38	2.22	5.31	13.52	1.98	13.05	3.06	6.57
200407	CREG2	31.15	49.09	26.96	58.66	28.64	44.46	24.99	20.04	55.77	72.93	43.46	62	47.19	33.02	45.39	55.23	64.7	54.19	23.14	28.69	75.82	50.78	55.25	54.17	22.79	67.86	49.12	51.44	36.06	48.25	60.95	27.44	26.78	49.78	39.29	123.15	53.75	72.12	19.34	44.5	63.62	23.95	41.15	33.66	31.87	55.72	55.23	44.77
579	NKX3-2	0.2	0.68	0.36	6.08	0	4.4	5.39	1.83	0	1.12	0.86	4.48	2.04	2.88	1.97	5.68	0.28	2.87	15.69	4.23	0.24	4.4	4.86	1.43	9.05	1.41	7.64	0.25	0.21	5.12	0.55	1.09	4.34	1.4	1.07	1.11	0	0.48	10.27	1.93	5.35	6.04	0.78	1.69	0	0.27	4.43	0.64
147657	ZNF480	14.66	17.44	11.22	13.18	10.82	15.65	9.64	26.4	21.22	18.33	17.01	21.01	14.11	13.01	17.18	16.58	21.1	14.18	9.45	18.07	15.22	24.34	13.42	17.69	14.64	24.62	12.18	20.97	16.53	23.3	31.03	23.65	17.94	27.14	10.13	9.32	14.86	18.98	12.68	14.1	18.62	11.96	14.41	9.2	12.18	19.49	14.88	17.3
130733	TMEM178A	9.57	2.33	2.6	4.01	3.02	2.79	9.59	3.76	4.01	1.09	2.48	5.41	14.24	1.16	6.93	2.06	4.68	2.74	12.64	5.11	3.3	8.17	17.63	3.51	7.39	1.26	10.44	1.82	3.59	8.13	3.68	1.12	5.59	2.95	3.54	2.79	3.83	0	4.52	6.8	8.62	8.13	4.28	0.69	13.76	4.14	9.13	2.92
6556	SLC11A1	3.43	3.44	4.56	41.96	2.76	10.75	9.65	2.5	9.45	7.24	3.05	15.68	19.73	16.92	5.37	18.13	8.53	33.9	13.51	17.2	9.41	6.88	3.79	19.29	9.31	9.95	10.67	5.65	2.52	5.37	3.18	7.56	5.98	8.4	9.77	20.76	19.7	6.87	3.7	16.34	6.94	26.98	4.04	16.98	14.73	6.24	12.54	8.31
29902	FAM216A	19.19	21.54	13.01	23.24	11.19	16.62	14.35	14.05	19.85	20.23	18.51	27.8	15.8	14.81	14.85	12.63	26.81	21.31	16.86	13.09	19.73	21.77	20.54	29.63	14.46	21.39	22.63	30.37	16.03	21.68	31.94	17.92	16.56	34.51	16.03	10.15	25.91	18.61	18.87	25.33	24.4	19.55	17.15	19.65	18.02	36.72	17.71	20.1
27293	SMPDL3B	3.07	5.02	2.48	0.31	1.05	0.8	0	2.97	1.89	2.66	3.11	2.98	1.55	5.97	3.38	0.33	4.73	6.99	0.23	3.75	1.39	0.38	0.36	6.04	0	10.42	0.96	4.91	1.27	1.08	3.48	7.26	0.79	14.3	0.3	0.67	1.71	0.88	0.59	0.34	1.95	0	4.62	0.59	1.76	3.8	0.34	0.77
100287327	USP17L17	0	0	0	0	0	0.25	0	0	0	0	0	0	5.41	4.44	0	0	0	0.09	7.82	0	0	0.78	0	0	2.67	0	0	0	0	0.31	0	0	0	2.24	0	0	0	0	0	0	0	4.76	1.36	0	2.63	0	0	0.67
55196	RESF1	37.51	52.7	43.5	28.29	33.11	31.29	23.88	63.4	86.11	38.12	44.91	47.44	32.37	44.24	27.33	23.14	63.72	51.43	26.06	76.69	82.54	70.12	26.7	94.83	37.21	49.39	27.42	91.18	36.06	33.84	198.37	171.44	42.51	74.64	31.38	22.13	29.61	27.03	25.69	33.52	33.87	35.07	35.72	31.7	49.11	41.92	25.64	47.62
57551	TAOK1	42.92	44.45	37.64	47.75	35.37	46.57	50.8	59.62	48.81	46.29	35.6	50.57	51.76	46.03	40.91	46.44	47.47	38.98	52.23	56.38	32.8	46.43	50.28	44.75	57.32	48.49	52.68	34.91	30.58	58.55	47.81	53.51	59.4	47.77	41.62	36.08	39.36	47.85	63.03	56.87	39.85	53.46	30.8	43.25	37.9	51.42	47.49	47.01
26277	TINF2	51.52	92.04	51.37	56.31	61.6	55.23	54.43	68.88	53.82	44.24	57.04	61.55	50.94	39.23	51.04	47.18	60.22	53.57	46.83	66.23	89.18	56.14	41.91	51.14	50.97	47.01	46.76	102.48	47.12	56.84	74.94	46.43	53.85	46.44	45.76	63.27	72.87	33.71	52.77	51.92	57.07	68.64	47.62	60.12	61.59	40.33	50.82	100.3
23189	KANK1	100.03	96.36	82.13	32.98	99.42	36	78.9	25.39	26.78	10.49	68.96	48.45	48.86	11.23	65.12	60.01	35.63	25.91	78.05	27.35	41.1	33.26	60.17	36.56	54.65	46.1	84.13	17.82	96.46	56.67	12.58	29.04	70.04	23.15	60.61	62.23	142.04	55.34	36.79	42.93	67.02	37.01	92.58	66.4	40.71	49.23	44.51	55.82
113235	SLC46A1	18.42	14.72	16.08	17.47	12.14	12.88	17.17	8.87	31.63	35.42	14.28	27.44	21.01	8.78	21.35	11.95	20.49	17.06	24.93	23	10.03	12.96	25.56	22.62	22.43	15.4	23.81	9.95	13.18	23.73	21.51	18.17	15.82	14.41	9.46	5.98	10.79	8.71	21.53	21.31	20.74	32.12	11.55	3.53	21.79	19.99	28.31	8.31
165829	GPR156	0.59	0.16	0.25	0.8	0.74	1.21	1.72	1.27	0.63	0.56	0.71	0.39	1.99	7.1	0.8	1.41	1.21	0.12	2.1	1.34	0.6	0.68	4.18	0.84	2.12	2.68	0.86	0	0.31	1.58	0	2.07	0.53	6.81	1.15	0.78	0.28	0.63	2.84	2.11	0.52	0.43	0.2	0.6	0.96	3.87	2.15	0.31
114049	BUD23	45.75	80.18	42.51	55.03	49.77	78.01	50.46	58.98	70.07	75.27	57.4	59.68	58.16	50.76	59.38	60	80.11	105.94	53.02	54.36	56.19	67.48	60.58	57.74	45.96	73.95	70.72	111.29	53.56	59.09	64.3	85.18	41.68	50.79	49.87	51.81	66.37	74.08	54.46	51.18	65.77	44.49	45.46	63.74	44.16	92.95	59.41	59.74
388759	C1orf229	11.58	13.66	12.13	21.78	9.33	18.33	16.4	6.01	15.97	15.96	17.24	24.25	25.75	12.18	19.03	24.77	27.88	22.98	16.49	14.13	26.79	23.56	22.94	26.67	18.37	34.86	26.26	22.63	22.32	32.6	28.31	11.58	13.56	30.18	18.89	14.41	23.34	21.92	15.6	18.43	26.32	15.24	22.97	8.4	20.63	29.71	35.62	16.92
81127	OR4K15	0	0	0	0	0	0	0	0	0	0	0	0	0	0	0	0	0	0	0	0	0	0	0	0	0	0	0	0	0	0	0	0	0	0	0	0	0	0	0	0	0	0	0	0	0	0	0	0
7099	TLR4	6.42	4.03	4.14	5.96	2.64	8.27	10.36	5.66	8	3.07	3.25	14.46	15.11	2.9	11.84	6.21	5.58	10.92	10	21.02	3.98	9.54	6.19	19.65	14.83	2.52	12.53	3.95	2.39	10.67	12.93	2.96	8.59	1.47	4.82	2.79	2.66	1.21	9.05	7.85	4.76	17.59	2	2.79	11.79	2.78	8.78	2.62
6134	RPL10	852.05	957.32	1085.84	718.72	841.06	470.4	740.28	1036.45	909.82	675.84	803.62	668.84	671.84	692.66	797.06	483	608.54	699.88	862.15	1040.01	470.82	832.24	576.7	717.82	667.36	510.73	634.47	1011.08	845.34	802.96	1150.65	619.94	659.2	1256.99	583.74	589.67	425.53	417.08	810.82	601.87	457.62	889.06	675.65	1008.05	909.56	826.54	607.38	529.11
203547	VMA21	45.1	69.18	34.49	52.98	37.86	55.47	28.62	92.86	49.66	40.39	53.4	65.05	47.21	46.63	51.81	52.77	61.44	62.71	26.65	50.84	61.4	74.23	42.83	48.96	39.16	83.26	46.43	106.49	44.63	52.15	65.54	63.11	38.59	75.87	43.46	53.48	43.25	54.17	35.5	35.85	43.87	35.51	40.56	48.23	36.55	93.97	57.35	41.7
59082	CARD18	0	0	0	0.76	0	0	0	0	0	1.26	0	0	0	1.83	0	5.61	0	0	0	0	0	1.86	0	0	0	0	0	0	0.71	0	0	0.62	2.2	0.95	0.72	0	0	0	0	0	0	0	2.66	0	0.65	0.91	0	0
2782	GNB1	209.23	219.77	211.98	302.13	186.19	311.15	261.8	327.29	258.03	229.05	200.76	231.3	233.16	349.13	213.59	294.4	237.7	295.85	267.8	293.83	243.73	292	209.77	228.67	266.48	198.47	269.73	285.53	149.96	239.47	244.9	359.94	239.55	210.87	176.69	271.91	132.95	193.51	281.09	239.62	194.6	327.44	136.39	299.35	222.87	301.05	233.59	188.3
8857	FCGBP	33.78	10.81	37.84	5.92	38.49	5.44	0.8	13.96	24.04	5.81	22.73	4.37	57.96	4.23	33.86	6.39	102.01	38.02	1.56	1.23	27.47	56.95	0.89	2.52	8.06	6.9	0.96	67.69	39.91	0.37	8.56	31.34	11.08	89.74	15.55	3.92	20.71	0.5	0.46	2.91	22.35	1.89	244.42	51.93	41.23	14.79	1.2	15.52
94086	HSPB9	0.88	0	0	0.99	0.76	1.94	1.7	0.81	0.95	0.83	0	0	0	2.39	0	2.09	1.22	1.06	4.08	0.85	2.16	2.43	2.26	3.78	2.61	1.25	0	1.11	0	1.19	4.89	1.61	0	1.24	1.88	1.22	0	0	1.68	1.22	3.55	1.72	0	0	1.7	1.19	1.22	4.69
56832	IFNK	5.25	2.3	4	2.28	3.15	7.13	4.68	1.11	5.67	3.03	7	9.07	5.16	1.09	5.98	6.23	5.58	6.3	2.99	5.45	0.99	4.45	4.15	6.36	3.98	6.31	4.8	8.17	4.67	5.46	7.84	3.69	3.96	3.4	2.16	8.96	5.12	1.95	3.08	4.47	4.88	3.55	2.38	6.86	7.8	2.73	9.53	1.72
25758	KIAA1549L	1	1.11	1.37	29.11	1.63	4.52	0.69	0.74	1.6	6.69	3.39	6.76	1.16	8.26	1.57	9.81	0.94	4.18	1.12	5.06	1.42	1.9	1.4	0.87	3.03	27.54	1.05	0.86	1.4	1.48	0.33	0.72	1.16	2.21	1.17	3.18	2.31	48.53	1.42	0.7	1.14	1.06	1.55	9.49	0.47	2.3	0.53	4.4
478	ATP1A3	0.52	1.32	1.47	2.18	0.65	0.28	4.74	1.43	1.39	0.36	1.68	0.85	1.15	3.49	3.5	0.31	1.56	1.39	8	6.68	0.32	2.31	1.32	0.55	3.1	0.55	11.07	0.82	0.54	0.51	4.53	1.18	1.68	0	0.42	0.36	0.71	0	4.21	1.43	1.56	0.76	0.89	0.82	0.6	1.92	0.36	0.14
222068	TMED4	131.19	189.34	117.57	153.44	111.85	156.64	120.34	180.75	154.99	140.25	164.83	180.8	177.24	141.65	181.84	134.54	163.22	144.58	131.46	139.55	161.11	182.37	168.89	181.07	133.74	164.38	181.66	251.11	147.99	196.33	217.61	139.39	136.98	171.88	137.3	155.2	163.62	202.27	131.56	164.07	210.94	146.04	127.78	110.81	124.85	218.9	199.12	144.39
2861	GPR37	5.12	1.34	4.91	3.13	3.93	4.45	13.55	0.85	2.81	1.73	2.55	3.77	3.22	2.42	3.83	0.1	1.39	0.4	9.09	2.43	1.85	3.82	5.06	0	5.38	0.24	6.32	1.59	1.59	5.67	0.58	0.61	8.96	0.24	1.97	0	6.74	0.81	6.49	6.63	5.63	8.61	1.16	1.25	2.43	0.68	3.96	1.61
126147	NTN5	4.9	4.96	1.41	0.95	2.66	1.93	2.23	2.7	7.76	13.66	2.83	2.04	2.61	2.47	2.08	2.6	4.41	3.06	2.95	2.08	1.57	3.41	3.01	4.34	2.04	0.9	2.84	0.82	2.32	3.11	4.24	3.6	4.79	2.68	5.13	2.25	3.12	2.59	1.24	0.45	4.13	1.03	4.05	0.69	1.57	1.99	0.45	3.18
780	DDR1	152.85	331.8	153.88	171.51	220.08	356.03	33.92	490.82	209.44	302.35	226.23	101.25	52.1	332.39	135.39	105.04	186.08	170.2	34.46	76.17	207.14	167.92	35.1	26.55	32.93	402.22	31.65	150.45	212.37	36.22	17.69	385.86	53.38	393.39	193.57	229.08	165.3	362.52	30.69	41.93	122.61	38.83	212.39	206.14	58.27	256.42	34.57	222.98
1318	SLC31A2	16.05	16.5	13.03	21.39	9.59	27.88	9.66	14.7	21.05	33.76	15.12	19.49	13.11	12.59	16.86	26.56	13.27	32.21	15.59	26.62	23.51	26.49	10.81	25.61	10.91	15.32	13.92	19.97	12.73	12.06	18.24	12.02	14.33	15.33	9.28	62.01	16.7	8.55	11.05	8.38	13.84	23.14	13.47	39.13	17.31	11.37	13.51	19.65
81533	ITFG1	31.46	39.72	22.93	30.77	26.38	28.68	41.41	54.35	44.5	33.86	23.96	33.58	38.94	37.65	29.64	34.2	33.78	36.97	33.81	46.61	31.98	45.52	31.74	32.57	48.52	38.34	34.54	33.41	20.97	39.87	28.24	26.56	39.16	25.81	26.58	29.4	21.79	34.76	42.36	26.08	21.87	37.46	25.44	21.19	35.55	29.32	27.49	29.15
107984862	LOC107984862	2.87	4.9	2.8	10.39	4.04	10.29	7.51	3.83	4.26	2.91	2.2	3.32	9.92	5.71	6.04	11.49	4.95	8.32	7.41	7.36	3.8	12.36	5.8	12.24	8.72	13.74	13.11	3.78	2.89	9.53	5.14	1.67	8.74	6.2	3.32	4.14	3.03	8.94	3.42	11.75	10.74	8.29	4.59	6.6	8.31	3.23	9.62	4.45
2533	FYB1	18.6	76.38	39.18	21.87	21.29	120	8.88	19.61	52.56	14.92	29.02	22.6	21.76	12.74	10.83	16.45	50.6	74.14	11.31	68.98	60.74	42.21	8.44	52.74	12.46	21.15	8.83	25.59	17.16	8.62	179.53	23.78	11.35	6.25	11.14	29.01	10.64	23.59	4.92	15.77	14.16	15.6	18.19	14.2	24.31	6.7	15.34	18.4
344558	SH3RF3	17.99	8.76	18.84	38.75	14.16	25.59	24.81	10.7	16.46	9.23	11.72	22.39	27.1	6.52	17.98	31.89	16.26	20.11	14.68	21.01	9.58	15.51	18.87	30.54	24.39	18.87	24.13	8.94	11.35	15.17	8.48	3.24	16.23	111.74	16.46	17.32	22.64	11.07	14.59	28.67	22.7	23.74	8.27	15.26	29.46	3.59	20.85	11.9
27244	SESN1	22.76	12.85	26.25	14.84	17.45	15.54	23.34	15.32	23.93	8.16	15.77	20.98	20.71	12.02	34.63	10.04	23.61	13.61	24.62	19.39	12.19	24.88	29.21	34.81	25.7	17.36	35.05	15.76	19.55	27.69	19.03	9.17	27.6	21.64	14.14	3.71	17.58	5.22	25.64	18.28	18.86	21.4	18.42	7.11	22.03	8.26	20.32	12.84
9693	RAPGEF2	29.67	21.49	24.95	36.22	21.55	23.28	42.43	24.06	24.56	11.93	18.08	37.37	44.26	20.99	35.79	27.71	29.19	30.36	37.68	33.93	17.21	32.42	43.05	40.36	39.67	23.26	44.33	17.29	22.19	37.88	24.87	14.21	45.82	25.94	26.7	16.2	28.68	31.74	42.29	42.87	44.43	42.13	26.05	19.75	35.11	16.55	35.61	18.24
9960	USP3	26.34	32.7	28.42	28.51	24.06	33.52	23.62	37.37	35.97	26.21	29.27	38.4	33.94	25.78	30.48	32.65	46.49	35.27	24.03	29.68	35.64	31.39	31.72	44.68	26.35	32.07	33.39	45.13	27.57	35.72	63.23	25.58	28.94	35.57	25.84	23.84	31.8	25.25	24.14	28.46	32.8	24.32	30.47	20.14	30.92	35.72	34.18	26.42
150368	PHETA2	11.61	14.72	12.49	20.24	8.53	19.57	13.6	9.18	15	19.31	10.45	15.78	14.52	16.52	16.64	18.31	12.52	18.73	14.45	17.08	12.03	9.3	13.36	21.79	18.26	34.2	15.54	11.21	6.89	12.76	5.88	19.01	17	31.62	11.74	12.02	12.23	21.86	20.41	16.02	10.86	19.01	15.74	18.01	17.68	10.95	18.72	11.07
30812	SOX8	2.9	0.5	3.52	1.8	0.88	0.16	5.89	0.4	2.19	1.36	0.63	2.11	2.78	0.52	4.29	0.69	2.81	1.22	5.24	4.33	4.44	1.2	3.54	3.53	5.01	0.21	4.41	0.73	1.52	2.35	8.85	0.26	3.95	17.29	0.93	0	0.61	0	2.63	1.81	4.48	2.69	4.28	0.31	6.02	0	2.21	0.15
51109	RDH11	28.6	43.2	26.85	35.28	28.31	40.51	22.92	20.54	48.45	53.26	35.21	33.32	29.47	66.51	28.28	35.85	32	37.96	23.83	37.92	48.59	43.77	25.01	27.35	33.67	58.95	28.69	38.89	27.68	38.07	22.82	62.91	28.5	54.92	26.51	34.42	26.02	57.44	35.31	24.14	29.24	42.71	23.28	43.78	23.46	51.22	31.46	40.94
143	PARP4	51.26	43.44	50.2	43.76	44.99	53.06	38.37	50.5	67.53	57.96	40.24	47.35	45.12	45.01	56.54	41.17	45.87	48.76	35.58	62.16	39.02	44.98	40.3	66.82	51.47	38.53	42.59	32.53	42.2	46.79	74.39	50.34	41.58	34.97	44.71	23.8	63.8	29.11	34.57	36.7	36.86	50.93	55.04	37.24	47.54	47.66	48.34	33.58
89874	SLC25A21	23.24	33.37	18.42	2.71	21.53	2.92	3.37	24.43	5.64	4.96	24.54	6.17	5.3	4.91	17.47	1.26	14.8	6.19	3.69	2.11	6.92	6.01	3.79	0.16	3.93	3.14	3.57	13.66	30.72	1.67	0.37	7.51	15.64	11.26	19.26	12.97	27.84	2.61	4.45	2.89	9.53	3.53	27.98	3.37	10.35	9.66	1.36	8.21
80781	COL18A1	132.02	144.06	142.37	384.62	134.63	329.13	192.32	151.51	156.41	116.86	98.2	172.73	251.3	141.43	213.88	415.37	141.24	308.46	170.29	278.82	104.13	184.69	154.43	377.33	251.44	243.3	162.54	139.41	143.7	135.13	63.56	54.1	207.99	244.86	145	194.72	190.11	152.49	181.19	313.48	245.41	300.67	98.48	279.02	291.08	63.87	235.52	128.73
84552	PARD6G	54.51	69.88	61.95	64.7	59.09	69.46	34.41	53	51.61	52.16	72.68	64.43	52.88	54.07	63.89	90.66	85.02	66.62	40.65	40.81	90.12	64.54	56.42	64.4	32.18	102.5	53.79	87.74	76.85	53.07	71.79	90.49	48.09	85.85	52.29	69.91	68.94	93.31	34.91	49.38	68.73	35.42	57.55	44.4	37.45	76.61	54.37	77.5
11179	ZNF277	15.7	17.43	12.72	14.71	11.36	14.7	14.76	14.83	25.73	24.7	15.76	20.56	16.44	11.45	16.89	13.75	13.77	13.15	14.08	18.67	12.07	20.87	13.52	16.13	19.11	16.56	22.82	21.75	13.57	16.81	22.24	18.39	18.76	25.04	14.89	10.73	13.43	12.08	14.95	13.58	12.06	12.8	12.9	22.21	12.96	18.91	18.52	13.93
282890	ZNF311	1.92	2.38	0.67	1.5	1.33	3.65	1.27	1.94	0.98	1.26	2.65	1.31	1.2	3.31	1.56	1.49	3.44	1.61	2.03	1.29	2.09	3.6	1.23	1.29	0.95	3.58	2.45	0.58	1.43	2.59	0.8	5.94	1.06	1.63	1.67	0.8	1.64	1.51	0.65	1.18	3.09	1.22	3.03	4.74	1.85	1.3	1.09	1.22
55771	PRR11	51.94	89.37	54.36	90.49	46.33	119.72	42.27	74.4	100.13	139.26	91.61	97.22	76.18	72.94	79.23	103.83	129.41	98.44	38.09	52.22	106.76	103.81	82.57	114.2	43.24	146.14	88.32	114.15	84.59	87.27	136.89	105.24	48.14	126.49	76.62	97.24	96.66	116.17	35.88	68.74	105.45	43.45	68.2	73.2	52.79	124.9	95.68	69.99
162461	TMEM92	2.83	3.6	0.71	3.39	1.6	8.54	0.94	29.89	4.56	4.76	2.01	1.83	4.23	7.92	4.09	11.81	2.24	3.66	1.96	1.77	2.64	10.67	1.5	6.52	0.89	4.75	1.89	5.13	2.42	0.57	2.58	5.72	0.37	1.48	1.23	9.19	1.04	5.99	0.45	2.02	4.94	1.89	9.79	16.43	2.7	2.14	2.33	2.95
1209	CLPTM1	99.88	124.06	90.09	86.08	97.55	123.5	99.89	93.32	108	110.43	113.42	94.22	80.65	137.94	96.76	91.84	102.59	149.8	101.41	116.59	91.08	77.28	93.19	79.44	101.99	59.41	85.16	110.72	82.07	91.25	100.4	117.52	76.09	72.53	75.67	163.2	68.24	79.72	95.16	95.03	84.97	92.32	68.59	76.92	70.48	121.15	90.41	92.35
9317	PTER	9.71	11.57	8.14	8.45	8.52	9.02	6.81	19	8.27	4.93	9.8	6.34	6.47	16.8	11.12	7.14	7.6	6.73	6.75	9.3	12.24	10.13	6.76	6.57	9.99	5.1	7.17	9.48	8.98	7.66	14.2	16.15	9.34	8.05	8.37	7.78	5.9	6.59	7.02	6.17	5.73	7.28	13.44	9.32	8.78	4.05	8.76	11.63
6578	SLCO2A1	49.85	18.48	65.51	40.66	61.29	41.89	61.63	17.88	66.78	36.39	46.05	42.12	71.09	6.14	56.63	40.28	45.11	39.15	31.06	71.48	34.94	49.47	39.22	133.92	34.12	19.41	49.11	16.71	69.03	31.62	37.66	13.83	54.6	81.94	39.97	8.32	50.46	11.42	43.08	41.92	53.75	16.81	42.53	15.04	70.59	4.58	22.21	32.21
10233	LRRC23	3.88	5.96	4.3	6.06	1.81	7.37	6.5	8.21	4.04	8.05	3.24	12.34	9.91	11.44	2.77	3.11	4.95	3.14	8.83	4.6	4.57	5.15	6.24	8.02	7.84	4.77	8	6	3.14	9.6	7.86	19.05	4.88	24.63	5.74	5.18	3.16	8.57	4.28	6.2	8.97	9.03	7.35	4.76	3.75	4.05	7.78	7.87
440087	SMCO3	0.64	0.24	0.58	0	0.82	0.77	0.83	0	0.73	0.27	0.11	0.57	0.55	0.77	0.6	0.51	0.13	0	0.4	0.41	0.52	0.94	0.83	0.82	0.21	0.61	0.38	1.23	0.68	1.16	2.08	0.62	0.93	1.2	0.31	0	0.41	0	0	0	0.29	0.19	0.42	0.21	0.21	0.87	0	0.23
120796	OR56A1	0	1.47	0	2.79	0	0	0	0	0.47	0	0.93	0	1.1	2.57	0	0	1.79	0	0	0	0	4.36	0	0	0	1.85	0	2.64	0	0	0	0.39	0	0	0	0	0	4.14	0	0	0	0.42	0	0	0	1.81	0	0.92
50700	RDH8	0	0	0	0.35	0	0	0	0	0	0	0	0	0	0	0	0	0	0	0	0	0	0	0	0	0	0	0	0	0	0	0	0	0	0	0	0	0	0	0	0	0	0	0	0	0	0	0	0
415116	PIM3	110.49	117.43	143.53	165.96	110.56	204.37	137.08	180.8	211.56	216.63	126.54	127.54	157.6	227.92	105.9	111.61	153.6	135.7	100.91	183.81	183.3	121.31	73.27	171.69	136.78	353.66	82.55	158.79	92.04	97.46	120.48	116.05	124.31	160.99	123.42	142.77	123.13	102.56	98.71	164.38	148.87	187.81	213.5	178.68	233.79	256.69	100.37	213.25
646754	TRIM64C	0	0	0	0	0	0	0	0	0	0	0	0	0	0	0	0	0	0	0	0	0	0	0	0	0	0	0	0	0	0	0	0	0	0	0	0	0	0	0	0	0	0	0.33	0	0	0	0	0
158055	C9orf163	0.44	1.67	0.66	1.16	0.89	3.23	0.14	1.07	1.9	4.11	1.27	0.58	0.75	1.98	1.63	1.22	0.61	1.05	0.41	0.71	1.43	0	0.38	0.84	0.29	3.12	0.19	2.04	1.69	0.79	2.03	1.6	1.12	4.72	0.47	4.26	1.24	3	0.56	0.61	0.98	0.14	3.31	2.49	1.13	1.19	0.61	0.47
64928	MRPL14	24.18	39.56	27.92	32.65	31.01	56.28	19.31	74.62	33.53	49.72	31.91	34.72	24.17	53.13	17.72	34.96	32.69	51.73	26.77	33.43	37.31	32.62	25.64	15.97	14.52	50	23.63	29.92	41.45	32.69	26.96	82.6	26.91	50.13	27.54	56.84	19.27	40.61	29.6	31.31	26.81	24.14	26.39	89.33	39.1	66.16	32.83	54.82
6490	PMEL	2.16	5.05	1.73	3	1.04	2.38	1.62	3.07	3.87	3.81	5.45	2.92	1.14	2.16	2.07	3.19	3.97	3.49	1.33	2.08	3.52	2.31	0.92	1.37	0.95	2.38	1.18	8.79	2.52	0.65	17.47	1.53	1.3	3.02	1.02	1	3.04	2.49	1.14	0.66	2.37	1.87	0.65	1.02	2.35	4.62	1.66	1.78
92002	CCNQ	16.65	29.69	17.59	25.91	20.22	19.41	19.01	57.17	24.7	25.26	22.79	25.41	16.06	26.19	16	16.48	17.56	34.74	22.52	24.45	20.33	20.23	22.47	19.39	18.05	21.05	23.87	30.23	10.62	17.23	27.45	25.37	15.47	28.72	13.17	30.23	8.97	19.22	19.56	18.48	20.71	20.36	15.21	18.81	14.86	23.91	23.96	17.13
220416	LRRC63	16.8	8.65	12.41	15.37	18.54	7.94	19.78	7.4	9.33	14.57	20.22	26.95	27.16	21.04	37.4	19.41	25.69	34.32	17.86	12.82	19.75	22.64	47.51	19.26	14.13	18.97	29.42	28.09	26.74	35.92	33.92	28.1	33.65	19.6	34.22	26.93	69.73	31.59	10.64	21.89	48.85	27.43	23.57	28.15	32.7	48.17	63.35	30.76
1375	CPT1B	12.66	36.73	15.09	27.59	9.94	46.73	35.82	25.77	35	48.14	28.55	22.09	14.98	29.75	20.86	31.68	28.5	23.85	27.06	20.16	61.55	54.4	17.34	32.48	20.25	72.96	23.29	41.31	17.09	24.71	50.66	61.43	23.09	97.78	37.36	26.74	17.6	28.25	24.5	17.99	37.02	15.96	24.77	14.17	18.52	97	11.97	45.56
10838	ZNF275	8.3	10.72	9.59	20.15	6.42	14.5	15.9	38.38	15.92	8.81	7.95	19.55	12.19	9.86	13.65	15.11	19.22	18.01	15.36	16.39	10.15	10.56	18.28	31.57	17.54	13.15	18.19	11.72	5.09	16.82	23.77	9.03	11.37	26.08	7.17	10.61	6.43	5.76	13.99	14.65	13.36	16.41	7.15	7.93	12.49	12.26	18.71	5.08
80059	LRRTM4	0.77	0	0.39	0.7	0.38	0.48	1.75	0.38	4.13	6.13	0.42	1.87	1.15	3.13	1.11	0.35	0.36	0.62	2.69	1.31	0	1.06	1.98	0.18	2.22	0	2.71	0.18	0.46	0.87	0	3.64	1.84	1.02	0	0.36	0.21	1.09	3.26	0.89	1.21	1.63	0.29	0	0.75	0	0.81	0
9949	AMMECR1	12.38	18.95	14.59	12.24	15.57	12.73	2.89	37.06	8.4	1.4	20.45	9.44	4.67	13.27	10.16	26.15	16.65	17.76	3.15	8.65	28.64	20.32	2.77	10.35	4.02	17.05	3.85	22.96	13.63	3.15	10.24	46.08	7.24	6.41	11.46	16.51	12.33	20.21	3.81	4.72	4.8	4.3	14.64	22.42	6.58	18.56	7.27	18.14
161779	PGBD4	35.92	46.88	30.87	46.02	29.14	45.7	25.04	29.04	42.75	38.8	54.74	56.02	47.72	31.36	49.19	51.8	65.91	46.97	25.61	30.48	63.3	54.73	47.19	67.29	27.48	80.31	59.89	64.3	49.53	56.41	79.07	35.28	35.49	71.71	51.34	47.82	59.31	58.77	24.74	49.07	66.14	31.55	45.82	26.15	35.99	74.05	60.85	39.95
1174	AP1S1	39.29	86.2	42.45	76.07	52.27	59.48	30.38	115.86	40.06	54.33	45.85	28.18	28.21	69.92	36.48	52	69.31	84.44	24.25	39.67	41.68	38.19	21.14	26.79	26.59	31.35	23.26	62.97	44.46	29.34	21.27	81.38	30.98	39.36	24.41	39.95	27.97	155.86	27.5	26.44	25.11	27.06	40.52	64.4	34.71	22.79	22.34	52.57
84631	SLITRK2	1.34	0.13	0.6	1.51	0.48	0.25	2.26	0.61	0.12	0.31	0.29	2.71	3.03	0.14	1.51	0.18	0.55	0.41	2.81	1.72	0.11	1.23	2.91	1.63	3.3	0.48	2.88	0	0.94	1.23	2.17	0.1	2	0.09	1.38	0	1.22	0.28	1.65	2.47	2.3	3.16	0.23	0	0.65	0.13	2.69	0.71
4622	MYH4	0	0.19	0.09	0.18	0	0	0.29	0	0.1	0.26	0.08	0	0.19	0	0.4	0.1	0	0.35	0	0.07	0	0.18	0	0	0.07	0.21	0	0	0	0.1	0.1	0	0	0.22	0.08	0.29	0	0.18	0	0.14	0	0	0	0.15	0.11	0	0.21	0
79002	TRIR	204.31	203.93	212.62	232.52	194.75	227.87	237.5	284.84	249.03	362.37	175.75	185.78	145.08	336.72	174.85	192.24	182.62	230.57	217.17	306.85	150.7	199.06	186.67	139.03	220.49	151.45	195.39	164.5	142.84	178.64	199.4	254.56	164.72	131.74	131.07	160.39	104.01	154.39	213.19	173.51	120.37	204.28	144.17	250.29	171.23	125.69	160.59	153.05
80071	CCDC15	7.06	14.6	6.12	4.07	5.31	5.72	1.77	11.15	11.56	12.63	7.65	3.46	2.25	7.34	4.78	4.38	7.59	7.12	3.44	3.98	6.58	8.36	3.07	5.16	2.28	5.6	1.98	7.66	5.27	2.1	5.49	12.11	4.06	7.61	5.91	4.88	2.59	9.02	1.46	1.31	3.89	1.44	4.51	5.56	3.85	4.76	3.27	5.37
6700	SPRR2A	1251.21	518.35	3753.18	491.55	3342.12	6.22	8.94	20.1	193.66	14.62	2910.65	427.53	18.2	132.19	430.69	2346	1414.61	1176.14	3.52	4.83	2558.19	103.34	0.9	0	3.46	6.09	7.86	601.99	1656.66	13.79	0	964.79	1771.46	164.75	1722.58	123.82	427.43	126.66	0.67	12.66	120.7	5.03	1487.61	966.41	28.7	0	1.95	4060.95
147372	CCBE1	28.08	28.16	19.89	33.8	21.23	28.17	22.23	19.12	28.92	27.2	32.06	34.78	38.52	25.16	34.65	36.03	43.35	31.99	30.87	21.83	45.79	38.36	35.52	44.72	22.69	57.68	49.35	38.26	32.97	48.69	51.28	31.02	27.16	40.91	36.64	38.46	50.07	45.21	20.47	43.3	52.62	23.08	32.54	24.78	25.42	41.12	53.98	31.74
80070	ADAMTS20	0.72	3.67	0	0.41	0	0.4	0	2.49	1.79	4.18	0.78	0	0.18	3.72	0.09	0	0.99	0.35	0	0	0	0.2	0	0.1	0.07	0.2	0	0.73	0	0	0	3.19	0	1.51	0	1	0	3.79	0	0.1	0	0	0	0	0	0.39	0	1.97
10808	HSPH1	34.8	95.98	33.12	55.11	47.51	168.96	43.72	103.45	81.75	84.92	61.84	61.42	81.79	107.14	31	90.56	74.21	134.75	41.42	85.94	58.84	55.04	62.29	40.58	137.07	107.75	107.45	519.46	31.51	92.83	688.81	91.07	81.96	70.47	89	190.84	37.5	90.28	62.52	91.53	118.06	82.45	32.03	230.88	32.25	73.02	47.71	123.74
6259	RYK	52.98	56.11	47.16	62.77	49.8	95.62	67.4	100.15	62.23	87.28	47.54	76.9	64.58	84.65	47.35	62.58	61.57	53.39	101.38	67.94	49.22	63.11	72.32	38.14	78.89	46.48	86.17	51.17	44.02	93.88	37.58	60.17	68.49	115.77	55.19	40.56	42.94	103.01	94.34	83.77	60.08	77.07	35.41	34.93	57.24	67.83	54.74	57.11
388610	TRNP1	99.75	42.03	109.51	36.31	103.46	22.98	42.59	52.22	11.46	16.18	72.45	31.35	25.02	10.6	46.91	7.11	23.56	17.7	56.16	17.54	16.35	19.38	42.47	4.62	39.5	19.95	45.08	16.17	76.5	33.32	1.28	20.58	53.3	14.22	80.36	29.54	129.43	6.4	40.9	31.28	45.4	42.76	349	26.43	24.36	6.07	21.75	42.46
105	ADARB2	3.25	4.57	4.32	4.48	3.68	3.59	3.1	2.67	4.06	2.66	7.86	6.82	4.96	2.14	5.17	4.44	8.61	4.73	2.91	2.78	5.28	5.41	4.25	6.38	2.21	8.02	5.29	6.23	4.98	4.11	7.65	2.23	3.45	28.83	4.41	9.84	7.88	4.96	2.32	5.88	7.25	4.02	4.91	3.69	3.12	4.93	6.99	4.39
3054	HCFC1	54.49	88.16	63.62	75.5	59.93	89.81	83.4	100.44	76.43	72.61	73.64	78.16	70.01	81.92	60.55	67.67	69.4	84.7	95.82	105.82	77.51	66.92	84.52	61.87	75.22	81.27	64.14	83.75	44.75	62.08	99.4	76.71	58.98	113.36	57.2	68.57	43.27	107.72	81.91	77.89	77.71	71.24	38.84	63.68	54.57	75.34	66.64	54.09
5089	PBX2	51.8	54.02	57.37	70.39	48.79	66.2	61.32	55.44	51.97	42.68	46.71	66.97	69.72	63.38	51.11	45.73	59.73	60.68	67.71	76.62	51.03	51	62.24	61.67	66.3	47.59	59.34	50.64	52.43	77.52	89.11	53.79	59.59	101.02	51.09	42.63	51.17	44.64	90.03	70.24	66.92	69.69	45.95	45.91	56.6	45.37	70.56	52.18
889	KRIT1	41.71	50.94	32.95	41.1	31.23	48.87	27.74	42.11	44.29	42.85	44.27	51.81	36.19	32.15	46.52	37.31	72.98	49.71	32	40.86	61.51	63.82	42.46	51.77	35.83	61.69	44.35	80.05	41.69	45.38	69.35	45.65	41.13	51.74	40.8	33.92	52	74.61	33.29	45.74	49.29	34.21	37.18	32.5	33.7	60.49	46.12	37.28
4986	OPRK1	1.59	2.46	1.9	1.83	1.44	2.68	1.15	2.46	2.52	1.81	2.57	4.25	2.24	1.99	2.97	2.69	4.69	4.28	1.68	1.13	2.15	3.24	2.64	3.53	1.73	4.78	3.48	3.25	2.55	2.48	3.56	2.33	1.71	4.65	2.11	3.08	3.53	3.56	1.55	2.35	4.02	2.04	2.55	1.58	1.79	4.98	3.57	1.98
10001	MED6	38.41	52.4	31.72	43.42	28.71	43.48	27.26	30.07	46.64	40.66	51.44	44.63	35.48	43.39	45.47	39.02	54.03	49.36	35.65	34.19	55.22	46.16	48.42	63	35.76	61.44	53.71	67.71	44.99	57.1	67.36	47.79	45.26	67.72	44.79	35.3	45.5	54.75	35.73	40.15	62.09	32.53	34.68	36.46	36.82	54.67	51.55	41.3
8997	KALRN	22.41	7.85	20.27	37.68	24.61	16.58	23.31	8.81	11.47	6.95	17.94	35.75	49.08	5.88	35.22	16.57	16.19	17.29	21.91	25.62	21.45	20.99	49.25	31.79	26.65	9.96	30.12	7.43	14.86	54.24	13.67	4.59	26.9	20.22	25.53	9.63	41.96	11.11	30.31	54.94	38.58	36.51	31.62	8.82	18.88	7.9	126	13.36
2624	GATA2	29.59	10.61	25.35	11.77	14.88	26.04	35.06	10.17	21.58	12.32	10.02	19.06	29.21	7.61	25.88	13.54	13.49	13.34	23.89	40.65	17.58	13.08	26.99	22.65	25.34	8.3	25.37	8.11	12.87	14.51	7.31	2.32	31.46	6.59	8.96	2.1	13.96	2.07	20.56	12.72	10.16	9.57	9.41	5.05	24.74	1.65	18.65	10.05
114932	MRFAP1L1	30.26	34.49	29.04	26.63	25.77	45.41	31.87	63.09	39.86	25.35	31.49	38.12	30.56	35.61	33.74	34.23	36.22	28.7	49.54	41.58	25.37	40.11	30.33	38.9	44.31	32.7	34.25	27.64	26.37	35.01	31.15	33.68	43.88	35.91	28.35	30.64	33.36	38.24	37.95	35.88	35.57	34.08	27.2	42.25	37.53	24.57	26.39	22.09
6001	RGS10	30.79	31.99	28.13	20.49	35.65	32.85	27.28	34.62	38.82	39.96	41.24	19.31	33.6	24.2	22.99	19.74	24.23	32.06	29.4	51.03	25.48	39.29	23.12	28.23	18.4	27.19	22.46	32.26	28.23	13.63	76.12	37.3	25.06	28.27	17.19	24.3	36.45	8.52	31.47	16.7	17.65	21.41	35.05	23.28	35.48	22.24	25.1	16.91
146395	GSG1L	0	0	0	0	0.36	0.11	1.31	0	0	0.09	0.39	0.96	1.59	0.08	0.24	0.49	1.15	0.24	0.38	0.4	0.24	0	0.53	0	0.58	0	0.26	0	0	0.13	1.15	0.09	0.39	3.05	0.44	0.12	0.14	0	1.04	0.14	0.49	0.41	0.19	0.19	0	0.13	0.14	0.39
8170	SLC14A2	22.55	26.24	17.2	26.04	17.01	27.77	16.11	18.57	23.1	20.2	36.2	35.02	32.64	18.19	33.91	36.28	43.33	30.34	15.4	19.15	42.32	39.13	32.47	37.81	15.39	50.12	29.78	35.75	31.18	34.75	55.7	22	21.61	43.27	32.09	28.25	40.24	33.19	12.66	32.29	45.52	19.75	34.69	18.75	22.4	46.85	42.82	27.27
7559	ZNF12	17.67	18.41	14.6	16.3	15.95	27.22	14.56	24.08	24.53	23.69	16.01	18.12	13.39	23.33	17.19	15.34	19.62	17	20.01	20.66	17.05	19.58	16.43	21.31	19.82	20.24	16.8	28.72	15.39	20.62	20.89	30.35	21.49	20.63	16.87	16.66	21.13	20.57	18.83	19.63	18.05	17.17	18.68	17.15	16.09	27.55	18.3	18.89
642819	ZNF487	3.21	2.63	1.24	4.02	3.23	4.35	3.14	2.17	4.63	2.68	3.56	5.31	4.67	1.64	2.21	3.21	4.45	2.47	4.75	2.74	5.12	4.55	6.01	8.79	3.28	2.48	5.12	1.63	3.76	6.22	4.98	2.75	4.72	1.96	4.4	2.06	4.62	2.6	2.92	4.32	2.15	4.05	2.92	1.46	4.23	2.71	4.82	2.34
55450	CAMK2N1	48.72	10.15	43.19	43.13	29.31	25.22	66.94	30.48	18.41	24.82	18.18	65.69	44.23	28.56	41.07	31.94	20.88	39.22	75.41	42.66	8.51	29.34	64.82	31.49	79.07	33.88	66.76	7.07	27.91	60.85	6.18	3.18	61.88	9.54	43.59	74.56	46.64	24.32	77.01	70.22	49.71	76.54	47.79	17.67	37.34	6.33	83.76	12.97
399823	FOXI2	3.01	0	2.96	0.16	4.34	0.15	0.4	0.38	0	0	2.97	1.09	0.18	0.62	3.55	0.16	0.38	0.16	0.51	0.13	0.84	0	0.35	1.96	0.41	0.19	0.91	0.17	2.91	0.19	0.19	0	2.55	0.19	1.32	0	6.63	0.17	0.39	0	0	0	2.02	0	0.4	0	0.57	0.29
10938	EHD1	66.13	51.67	68.5	90	50.79	62.12	139.49	54.22	60.43	40.29	62.33	70.96	115.38	61.92	62.34	70.93	73.47	96.32	145.15	101.95	72.33	56.13	93.57	110.47	113.69	88.82	130.22	45.44	37.06	91.12	170.74	47.5	84.55	29.43	70.16	66.89	53.16	65.65	89.65	96.71	108.77	113.17	60.94	100.74	76.21	24.12	82.95	54.59
163882	CNST	39.03	40.39	34.33	35.23	32.4	26.23	41.15	48.9	34.72	31.85	32.64	44.74	39.6	20.83	44.78	26.88	37.25	30.44	52.18	40.14	34.68	38.47	55.1	47.88	48.72	33.33	60.08	37.4	35.52	48.32	52.25	24.69	57.56	29.94	46.97	23.25	46.15	25.31	45.39	41.03	58.37	46.6	32.64	20.11	31.28	53.8	47.6	35.26
219578	ZNF804B	0	0.09	0	0	0	0	0	0	0	0	0	0	0	0	0.09	0	0	0	0	0	0	0	0	0	0	0	0	0	0	0	0.74	0.07	0	0	0	0	0	0	0.07	0.11	0	0	0	0	0	0	0	0
357	SHROOM2	8.87	9.1	12.37	7.78	9.9	12.73	1.66	0.98	7.05	1.61	11.32	5.78	2.96	6.44	7.1	7.78	18.41	13.24	0.99	3.91	13.22	5.94	3.12	3.36	1.46	13.23	2.2	25.16	12.83	1.52	1.15	11.8	5.44	13.55	8.47	17.74	10.55	11.99	3.17	3.37	7.88	1.28	7.02	5.67	3.64	3.31	2.14	10.01
102800317	TPTEP2-CSNK1E	7.46	8.73	12.09	16.75	6.13	13.53	8.42	11.29	12.63	21.89	8.94	12.27	11.68	13.83	14.28	10.38	8.6	6.32	13.28	14.33	12.12	8.98	16.45	19.21	11.03	31.24	13.42	8.77	8.94	21.09	31.72	10.14	4.04	22.17	10.43	15.51	12.45	16.31	11.28	17.29	17.1	6.31	11.63	15.27	7.73	30.87	12.68	17.23
83643	CCDC3	156.3	46.25	127.44	79.09	109.18	59.97	86.08	35.19	72.2	53.43	58.06	104.7	110.54	7.5	77.31	35.87	45.55	32.42	119.18	128.72	22.59	50.75	100.28	82.14	83.05	24.92	93.24	19.21	45.22	209.98	14.03	6.17	98.33	33.65	99.5	31.69	89.09	9.46	139.53	114.22	47.2	51.58	34.21	12.49	203.76	5.64	116.94	23.28
116511	MAS1L	4	0	0.98	0	0.32	0	1.05	0	1.57	0.34	0.39	0.48	0.46	0.33	5.39	0.43	0.5	0	0.67	1.05	0.45	4.01	1.87	0	1.08	0	3.85	0	0	1.97	1.51	0.33	5.55	0	0.39	0	0	0	0.69	0.5	0	1.78	0	0	1.05	0	1.01	0
554282	FAM72C	0	0	1.11	1.85	1.88	6.29	0	11.21	3.02	0	2.39	0	0	3.24	0	3.92	0	0	0	0	8.45	2.85	0	0	0	1.63	0	4.33	0	0	4.75	4.09	0.29	0	0	2.53	0	1.05	0.16	0	0	0.39	1.49	1.16	0	0	0	0.87
54976	C20orf27	48.23	78.07	45.76	63.52	47.84	60.37	65.04	140.2	95.8	118.32	59.55	81.26	89.81	121.28	50.6	46.11	50.1	79.91	163.45	114.32	49.75	57.64	185.14	42.46	113.11	94.19	93.31	75.93	38.52	151.48	38.58	104.3	67.2	93.97	65.38	94.92	27.36	85.09	149.59	121.13	57.15	91.17	25.09	68.45	50.93	110.11	110.08	79.88
7789	ZXDA	7.43	7.35	6.94	10.1	5.74	5.54	9.41	11.18	7.09	4.77	5.75	8.49	10.47	6.87	11.7	4.92	9.87	7.71	11.23	9.57	4.79	5.91	10.19	9.8	11.22	6.77	10.51	5.84	4.58	10.83	9.45	6.63	7.67	9.9	7.25	4.2	4.31	4.18	8.76	7.19	10.5	10.12	10.25	3.74	12.09	8.48	7.64	3.27
79680	RTL10	22.14	29.59	21.85	24.14	21.08	25.43	13.21	31.55	20.36	20.07	26.71	26.63	18	29.77	23.43	24.6	31.41	29.39	17.56	18.13	36.2	27.74	20.14	23.28	14.2	63.54	23.62	25.63	27.65	24.28	33.67	25.72	16.04	62.05	21.38	35.7	26	24.15	13.51	18.17	28.38	16.06	24.09	23.93	16.97	41.46	21.96	20.16
10426	TUBGCP3	33.89	39.8	30.03	19.75	27.72	50.86	28.62	30.2	44.73	38.62	32.65	42.97	32.45	60.25	35.96	29.98	38.45	38.21	31.2	37.8	40.52	44.05	28.85	36.37	31.89	27.79	31.77	35.3	32.22	42.68	55.8	23.99	31.9	44.58	26.06	29.22	28.18	63.75	32.52	28.29	33.1	31.2	23.85	29.18	29.3	25.16	42.39	20.05
8445	DYRK2	18.79	25.7	15.03	26.84	15.73	31.07	18.67	27.65	22.95	22.17	20.06	18.24	15.69	32.19	17.23	27.77	19.86	21.62	29.16	22.02	18.43	24.53	14.44	25.43	21.77	24.43	22.26	18.06	12.33	22.56	37.24	21.85	16.83	24.38	17.11	22.53	13.17	15.14	14.35	15.82	16.4	18.43	17.63	18.39	12.82	18.3	15.08	15.81
5261	PHKG2	16.65	26.97	18.57	28.35	18.57	29.95	13.73	25.41	30.96	33.79	25.78	27.42	20.51	26.2	21.59	35.75	31.26	32.89	16.68	20.6	43.55	23.87	22.34	25.76	12.95	38.25	25.92	37.24	23	18.81	35.93	25.36	19.24	36.55	26.85	25.67	35.01	39.54	12.81	20.02	32.47	17.27	27.84	22.55	18.67	30.03	25.16	29.57
2862	MLNR	0.74	0.42	0.67	0	0.64	0.41	0.36	0.34	0.8	0	0.4	0.98	0	2	0	0.44	1.02	0	1.71	0	0	0	0.95	0.53	0	0.53	0.49	0.47	0	0.5	0.51	1.69	0.4	1.56	0.79	2.57	0	0.89	1.06	0	0	0.36	1.09	1.57	0.36	0	0.51	0.79
2100	ESR2	7.75	11.95	7.02	10.37	7.07	6.97	4.79	4.88	12.03	7.63	11.89	13.18	6.7	5.25	11.45	6.75	14.62	10.83	3.4	9.16	12.32	8.45	9.42	13.5	4.46	9.64	8.98	17.41	12.99	8.25	24.5	11.02	7.25	9.78	5.24	6.59	10.09	8.56	3.72	7.05	13.33	3.63	8.42	3.84	7.2	19.73	9.85	8.01
392843	IQCA1L	0.17	0	0.31	0.19	0.15	0	0.17	0	0	0	0	0.23	0.22	0	0	0	0.24	0.21	0	0	0.21	0	0.22	0	0	0	0.23	0	0	0	0.72	0	0	0	0	0	0	0	0	0	0	0	0	0	0	0	0	0
51666	ASB4	2.25	3.96	2.94	3.09	2.57	5.55	2.64	3.82	3.44	2.18	3.88	4.88	5.48	3.87	5.89	2.9	5.71	3.7	2.29	2.22	6.99	9.56	5.28	6.08	2.07	6.77	5.48	5.66	4.65	6.79	5.66	3.37	2.45	9.28	3.77	2.76	4.38	4.31	2.25	3.01	3.47	3.12	2.42	3.27	1.5	6.36	5.7	2.37
4215	MAP3K3	40.4	27.14	40.51	42.48	29.2	42.19	57.44	35.63	36.02	24.32	26.63	54.22	59.46	19.81	47.09	29.78	39.41	41.73	58.65	69.37	25.12	35.69	46.64	56.2	52.53	15.74	60.56	21.13	29.18	56.38	54.43	18.48	46	18.08	26.54	25.82	35.6	14.25	59.97	53.42	45.8	61.9	27.69	21.86	59.12	27.54	74.11	23.24
85451	UNK	39.78	47.89	37.7	44.26	32.42	51.18	27.16	30.22	44.89	40.73	47.27	55.34	46.88	52.15	51.34	45.53	63.54	51.57	32.71	41.86	59.82	54.33	47.97	59.53	34.51	102.11	52.71	48.35	47.74	49.48	70.91	34.68	31.97	65	39.08	41.6	60.27	58.55	29.42	41.51	58.94	30.49	41.79	30.92	36.92	84.98	54.02	35.39
3850	KRT3	3.53	0.45	1.6	0.22	3.05	0.22	0	0.54	0.43	0.37	3.25	0.46	0	0	3.08	1.41	1.36	0.47	0	0	0.24	0.81	0	0	0	1.11	0	0.23	2.46	0	0	1.07	1.17	0	1.07	0	2.82	0.73	0	0	4.32	0	2.27	0.42	0	0.51	0.17	1.46
64219	PJA1	15.57	17.14	14.87	25.79	17.92	23.27	20.54	15.13	11.3	10.93	16.07	20.22	16.06	16.23	13.49	19.04	16.27	18.08	31.7	19.87	8.62	18.6	28.07	18.74	23.77	42.48	22.2	12.66	12.15	21.44	12.51	17.78	13.76	34.41	14.55	24.8	9.07	35.79	22.82	11.81	17.41	26.2	7.65	33.85	14.31	18.31	18.46	20.43
8943	AP3D1	79.79	92.24	78.84	94.12	83.86	94.52	91.29	110.17	113.7	164	83.05	101.68	80.51	135.93	78.74	76.36	97.59	99.26	110.65	106.69	96.45	61.57	94.75	85.62	85.09	129.52	101.98	121.84	77.8	73.35	97.65	155.67	78.26	81.44	107.3	109.39	88.47	159	84.69	81.29	103.74	89.72	84.65	70.14	74.28	136.63	104.7	124.71
6904	TBCD	71.34	81.72	74.51	83.1	71.94	51.26	52.7	67.98	83.5	80.11	80.13	66.8	76.17	50.7	78.11	63.28	70.87	79.78	50.86	65.93	72.41	64.65	69.11	81.78	57.96	47.72	60.32	54.95	75	62.7	65.83	55.14	57.88	71.28	79.87	84.45	79.69	79.8	61.12	85.19	103.13	73.27	101.5	62.75	71.9	118.9	84.22	89.29
5743	PTGS2	13.92	4.95	16.27	34.01	10.71	10.9	67.09	4.7	27.44	10.36	9.63	59.87	166.76	12.3	21.44	14.31	17.88	27.61	53.75	33.59	3.26	28.46	88.22	41.27	49.89	20.33	28.72	9.74	2.28	29.37	17.8	6.86	55.7	4.57	137.67	8.08	29.93	1.55	114.88	89.19	33.13	52.19	6.9	43.21	78.5	1.6	45.64	27.95
105375817	LOC105375817	15.22	38.49	5.06	29.21	8	24.03	11.13	19.6	22.26	31.29	21.56	14.74	15.7	31.96	16.22	17.09	26.04	30.97	8.4	6.94	38.31	51.67	18.24	16.28	12.18	34.53	15.97	30.99	12.12	13.48	31.51	29.67	12.87	46.34	15.68	13.02	21.51	53.13	7.39	24.76	15.16	18.35	7.26	9.85	7.3	45.3	20.67	20.8
1557	CYP2C19	8.67	19.06	11.84	13.52	15.83	9.2	6.94	8.77	9.38	9.92	18.72	20.24	14.81	7.37	20.44	13.09	26.06	14.51	7.88	8.12	18.49	15.52	11.97	19.76	5.73	20.05	14.56	20.29	33.47	18.75	18.98	11.03	10.62	12.69	15.92	11.03	40.24	19.54	6.17	14.85	23.92	6.52	42.71	5.16	7.9	16.44	21.13	15.82
4595	MUTYH	14.51	35.87	16.03	19.96	16.88	18.78	14.72	21.6	26.18	34.55	30.09	17.96	10.5	17.72	12.78	13.11	25.8	33.78	18.94	19.04	33.76	31.39	17.72	16.32	12.37	38.8	18.15	55.04	14.99	18.53	31.2	42.38	14.87	33.37	14.08	14.32	16.17	28.87	14.73	12.65	23.46	14.76	18.08	16.62	18.85	36.95	13.66	17.75
200008	CDCP2	0.66	0	0.4	0.5	0	0	0.43	0.41	0.24	0.62	0.24	0.29	0.85	0	0.82	0.26	0.61	0.27	0.41	0.43	0.27	0.3	0.85	0.63	0.22	0.63	0.88	0.56	0.23	0.3	0	0.61	0.24	0.31	0	0	0	0.27	0	0.61	0	0	0.87	0	0.85	0	0	0
6882	TAF11	25.61	27.88	22.78	30.78	26.14	41.16	25.14	33.54	31.31	24.59	27.89	39.67	27.84	25.6	31.9	35.44	38.6	31.24	25.91	31.97	33.63	43.08	39.44	40.78	22.78	38.19	43.54	37.26	28.26	37.47	40.14	39.65	34.74	60.6	22.47	28.44	36.72	38.64	30.75	30.12	34.2	24.05	27.31	28.86	28.12	40.13	44.04	32.76
1615	DARS1	38.51	37.63	37.84	50.13	41.47	50.08	110.95	61.38	61.52	77.77	32.48	53.57	63.64	46.73	45.98	41.51	50.92	46.63	122.33	70.42	43.48	53.53	72.73	27.74	92.32	52.95	89.22	75.58	35.48	71.48	43.6	71.38	92.84	83.04	48.33	34.04	34.23	50.45	87.81	58.09	63.23	88.18	27.44	50.63	32.23	47.29	47.14	58.59
7009	TMBIM6	373.99	418.33	406.19	317	413.71	486.99	295.55	532.29	431.34	484.39	377.66	341.66	315.21	591.18	345.54	288.65	376.25	373.67	327.37	401.6	284.72	329.48	267.39	279.51	347.84	238.24	327.28	423	350.89	320.95	310.56	571.8	305.05	183.36	294.41	384.73	288.7	263.01	350.89	251.15	226.07	422.77	322.18	313	284.62	481.72	266.91	321.11
84626	KRBA1	13.12	12.56	9.71	34.18	9.97	16.48	14.48	4.23	12.04	25.22	8.28	15.96	18.94	11.99	12.33	18.48	12.93	18.13	21.03	23.14	14.95	10.29	19.84	11.87	16.78	24.98	16.22	16.04	11.57	22.25	11.33	5.21	11.35	25.47	14.83	24.32	15.96	26.96	18.75	14.15	24.6	14.84	12.26	16.11	14.99	21.41	29.44	14.55
100528021	ST20-MTHFS	3.35	6.03	4.63	4.3	3.45	15.96	4	8.87	5.83	6.38	5.99	4.46	6.39	5.53	8.14	6.7	7.84	9.15	5.47	5.03	6.09	4.74	7.08	4.89	7.2	5.93	7.19	10.56	2.03	5.87	11.76	5.63	1.97	4.5	4.68	8.49	5.28	7.66	5.64	4.61	2.42	5.22	4.95	3.61	6.49	12.06	6.35	5.14
2012	EMP1	1668.07	132.56	1922.02	220.56	2210.79	123.11	352.8	154.97	117.94	57.89	1186.43	208.72	376.15	213.53	1104.49	190.13	206.57	127.57	124.03	128.52	183.77	140.5	106.83	759.27	172.66	65.81	239.26	134.48	2012.54	126.74	23.9	255.68	1536.75	99.04	1605.21	75.93	3051.46	120.24	208.53	233.5	179.27	243.91	1957.58	116.93	323.14	44.85	124.15	541.61
126	ADH1C	13.06	23.06	20.23	2.28	40.21	0.22	12.46	2194.34	1.32	0.95	46.43	13.64	5.21	6.21	16.65	0.64	87.4	0.17	11.62	7.68	3.75	1.95	7.89	20.05	6.19	13.96	4.24	4.25	6.78	12.3	1.02	55.57	5.93	0	27.04	0	7.06	0.37	8.2	6.04	11.05	4.71	43.43	0	8.17	0	6.11	26.65
79310	OR5H2	0	0	0	0	0	0	0	0	0	0	0	0	0	0	0	0	0	0.59	0	0	0	0	0	0	0	0	0	0	0	0	0	0	0	0	0	0	0	0	0	0	0	0	0	0	0	0	0	0
139135	PASD1	1.95	2.59	2.41	3.14	1.39	2.42	1.79	1.81	2.52	2.28	2.76	3.26	3.55	3.31	3.75	3.07	4.84	3.47	2.5	1.32	4.25	4.31	2.61	6.6	2.11	3.98	3.03	3.37	2.61	3.11	3.84	40	1.77	5.38	2.09	3.68	4.86	3.3	1.36	2.96	4.02	1.65	2.19	0	2.18	3.93	4.85	2.25
131096	KCNH8	1.86	2.2	1.78	1.72	1.01	0.1	1.28	0	3.78	3.6	1.09	2.15	1.14	4.18	3.45	0.69	2.47	1.63	1.3	2.57	3.73	1.56	1.73	4.2	2.13	0.5	2.09	3.67	0.64	1.32	4.14	0.53	0.99	5.89	0	0	0.33	7.84	0.89	1.16	2.29	1.59	5.03	0	3.49	9.21	1.76	1.49
55872	PBK	5.42	18.06	4.44	5.01	7.27	22.85	0.25	16.93	24.31	33.01	10.69	5.72	0.65	14.46	2.51	8.49	8.18	8.07	0.24	3.33	13.27	9.52	0	1.41	1.01	4.25	0.34	12.02	4.55	0.34	5.13	20.49	3.76	18.67	11.6	9.23	4.17	8.93	0	0.35	2.39	0.5	1.94	9.43	1.67	8.67	0.35	13.12
1825	DSC3	158.13	398.92	170.1	151.98	240.49	266.1	5.21	160.36	251.47	367.64	216.58	113.07	9.26	132.89	107.32	273.12	292.96	163.26	4.82	19.48	254.96	194.67	6.58	10.44	4.58	252.36	7.93	282.64	230.45	10.39	9.28	277.98	92.65	73.42	258.25	199.4	138.12	381.44	4.3	10.73	48.41	7.16	128.82	602.79	21.89	90.42	9.39	371.93
5698	PSMB9	41.86	84.57	38.1	40.59	21.71	166.25	29.03	42.93	70.35	23.02	34.53	29.45	38.37	57.09	20.21	53.5	45.91	83.56	19.8	92.53	36.76	82.2	7.59	50.81	69.61	31.01	21.06	55.27	27.75	24.61	160.25	112.67	25.77	37.65	28.71	126.8	7.7	30.76	27.8	11.98	28.7	56.46	18.36	138.24	50.11	70.21	22.74	42.13
943	TNFRSF8	1.17	3.4	1.72	3.95	2.05	3.59	2.46	1.32	3.84	1.06	2.2	2.35	1.6	13.03	1.62	4.32	2.65	3.74	1.43	6.38	2.67	2.14	0.34	10.5	1.75	2.31	1.64	1.65	1.28	1.85	10.14	4.07	1.06	3.02	1.04	2.16	1.57	1.02	0.47	2.3	1.43	1.54	1.86	2.21	2.52	3.26	3.17	1.46
57631	LRCH2	5.39	3.02	3.48	6.26	3.16	4	12.95	3.68	4.26	1.47	2.03	10.11	12.37	3.16	5.26	4.1	3.65	4.88	10.39	8.75	2.45	5.95	15.6	6.54	14.88	3.81	11.89	2.98	2.84	14.51	1.97	4.5	10.68	4.7	5.6	2.53	3.11	1.61	11.12	10.21	9.8	11.05	3.52	1.65	6.61	3.46	11.05	2.49
390595	UBAP1L	16.97	21.11	13.86	18.26	10.85	18.04	12.61	12.42	18.07	16.42	26.45	26.1	20.31	11.89	21	21.24	28.32	23.85	11.77	12.4	24.32	23.41	22.92	29.52	11.39	29.26	25.38	27.81	23.26	22.95	40.57	14.76	16.37	27.26	16.36	19.59	26.53	22.57	12.33	20.43	30.79	12.28	22.02	11.74	14.36	27.2	27.12	17.96
5167	ENPP1	8.17	4.74	9.43	10.79	5.24	5.71	11.25	7	6.93	3.55	4.81	11.3	13.56	6.16	11.25	7.74	6.35	5.53	18.65	10.46	3.99	10.6	14.62	21.41	11.09	5.23	11.08	5.64	5.33	16.87	5.35	1.96	12.15	7.16	7.96	3.08	9.43	4.34	7.11	9.71	7.69	9.58	6.55	3.05	13.88	5.01	12.89	3.57
1749	DLX5	4.05	2.89	1.37	3.4	1.79	10.71	0.98	11.02	9.85	10.66	5.71	10.77	0.82	18.74	1.87	8.98	11.12	11.24	0.6	2.93	13.26	14.66	0.23	4.35	1	15.96	0.67	15.43	3.19	1.37	0.7	7.63	3.86	9.94	0.34	11.93	1.16	42.37	0	0.45	2.72	1.09	1.9	9.4	0.49	41.69	0	16.89
3400	ID4	76.37	16.02	36.09	34.34	44.07	26.57	121.24	22.58	28.02	12.52	38.96	59.95	96.24	13	56.57	14.64	26.11	24.47	127.23	56.83	5.92	41.62	55.6	51.78	70.82	3.43	72.96	13.84	37.06	49.52	3.99	10.42	94.34	22.94	45.57	9.42	34.59	11.68	107.53	65.75	78.84	85.64	46.26	5.87	117.95	7.79	48.61	22.8
51027	BOLA1	14.12	20.88	14.13	18.49	12.25	18.48	21.24	39.77	29.98	31.36	12.34	19.35	11.36	25.97	19.37	10.56	17.35	17.58	30.51	24.7	12.17	16.59	18.8	16.48	30.46	31.19	26.29	9.27	20.35	26.17	13.06	35.85	16.52	23.48	13.42	12.33	7.38	20.21	27.96	19.57	19.66	26.07	16.48	10	25.27	9.2	21.78	20.6
5580	PRKCD	55.58	74.79	54.09	37.14	50.67	36.95	34.12	53.05	60.96	50.85	41.19	48.69	36.18	55.88	41.05	28.91	45.74	60.08	41.96	50.27	55.02	32.49	27.58	46.05	30.97	54.56	26.03	39.35	47.7	35.03	90.51	35.32	33.54	31.06	44.15	31.53	60.38	49.54	26.68	26.59	35.83	36.08	85.66	38.67	38.62	85.79	28.28	47.33
317701	VN1R2	22.16	31.74	20.24	24.35	13.33	28.85	11.79	21.26	19.23	19.96	34.08	45.98	27.61	15.98	29.41	25.82	41.76	32.93	10.92	18.47	34.37	37.83	34.05	35.07	14.84	19.89	32.43	24.51	24.64	35.66	43.79	18.61	19.58	39.93	13.53	14.45	34.39	24.06	13.84	20.54	28.93	23.94	10.06	11.59	16.94	27.25	31.28	16.74
284355	TPRX1	0	0.84	0.22	0	0.64	0	0	0.23	0	0.46	1.6	0	0	0	0	0	0	0	0	0.24	0	0	0.32	0	0	0	0	0	0	0	0.68	0.22	0	0.35	0.26	0	0	1.49	0	0	0	0	0.24	0	0	0	0	0.26
84314	TMEM107	13.61	12.71	12.17	21.22	13.79	14.61	16.33	12.8	11.69	14.57	12.99	24.97	22.34	16.62	12.98	13.58	25.08	17.24	18.46	17.14	11.2	14.81	28.18	18.22	22.54	16.06	16.15	12.15	8.58	18.32	20.38	23.47	16.67	19.16	14.42	11.85	13.45	21.18	22.49	11.78	12.32	13.75	12.64	14.83	13.93	22.08	16.18	12.85
54861	SNRK	52.46	34.73	40.9	34.07	28.69	28.81	56.58	27.95	39.29	22.48	25.09	44.8	51.38	20.04	46.76	28.02	38.56	34.8	50.95	67.48	28.22	40.78	36.75	50.28	58.71	14.97	51.59	19.55	41.27	62.22	38.28	19.11	53.33	22.02	46.22	30.05	33.14	15.52	69.13	48.73	29.43	37.6	30.3	18.21	68.06	30.29	44.07	32.65
1489	CTF1	29.9	36.4	20.78	31.68	18.62	18.48	39.32	19.29	19.28	24.59	20.53	37.52	27.01	28.85	25.07	18.38	22.64	33.19	50.01	23.22	16.4	22.69	43.16	18.24	27.41	32.74	33.72	23.88	21.2	27.68	21.48	16.1	27.44	29.7	19.74	22.69	25.38	32.08	32.86	34.75	39.14	37.03	24.28	11.16	26.12	27.02	42.05	14.03
6288	SAA1	10.57	17.64	26.83	9.32	5.28	24.4	2.21	1.72	185.37	195.19	10.57	8.96	10.41	22.78	22.41	5.8	103.25	66.76	0	4.74	50.69	57.81	0	55.18	0.93	38.51	0	107.81	2.06	0	11.78	40.28	1.02	14.5	4.82	11	1.32	0	1.79	1.3	76.32	3.07	1.07	55.14	48.36	0	7.06	15.61
137362	GOT1L1	0.2	0.45	0.18	0	0.34	0.73	0.64	0	0	0.18	0.42	0.52	1.21	0	0	0.4	0	0.8	0.62	0.19	0.24	0	1.71	0	0.39	0	2.2	0	0	0.9	0	0.3	0.43	0	0.63	0	0	0	0.37	0.46	0	0.33	0	0	0	0.26	0.92	0
94097	SFXN5	7.48	16.11	9.37	12.7	7.24	17.89	6.24	8.3	8.43	10.03	11.6	8.13	10.43	8.55	7.89	18.35	10.98	21.29	7.47	12.1	17.67	17.02	10.37	13.14	7.05	9.79	10.84	15.51	6.92	8.15	7.88	8.68	6.2	15.57	6.98	21.81	10.02	13.1	7.57	10.94	9.23	7.92	9.19	9.21	7.16	23.33	14.61	9.68
5438	POLR2I	50.31	75.21	58.38	45.45	85.35	58	101.57	46.08	58.02	34.56	93.33	64.98	54.27	57.51	71.73	49.13	64.89	56.35	94.19	82.96	28.74	50.88	54.54	33.61	77.23	47.62	51.74	76.38	39.97	72.54	43.4	61.29	51.14	37.63	38.25	89.89	42.56	37.79	57.62	63.5	48.01	67.72	42.92	38	48.6	57.5	49.66	42.83
23626	SPO11	0	0	0	0	0	0	0	0	0	0	0	0	0	0	0	0	0	0	0	0	0	0	0	0	0	0	0	0	0	0	0	0	0	0	0	0	0	0	0	0	0	0	0	0	0	0	0	0
257415	FAM133B	21.52	32.6	17.71	26.57	15.96	30.11	25.32	23.95	27.55	20.8	33.75	36.77	48.07	19.71	29.94	21.87	54.99	34.92	16.11	30.32	35.91	38.24	53.49	35.47	26.21	31.1	29.83	36.78	23.38	26.05	45.3	29.85	39.32	35.77	39.36	18.32	26.14	28.07	26.85	44.8	49.89	24.59	25.52	18.03	29.86	47.2	40.26	27.78
56033	BARX1	0	0	0	2.72	0	1.33	0	9.66	0.98	3.39	0.65	0.4	1.15	44.05	0.74	1.79	0	1.45	0.28	14.23	0.37	0	0	0	0.59	12.83	0	0	0	0	0	4.13	0	13.1	0	0	0	0.73	0	0	0	0	41.52	0	0	2.04	0	0.32
23259	DDHD2	31.49	41.36	26.66	34.78	23.52	37.55	48.91	39.03	30.01	17.6	22.96	38.61	38.94	17.27	40.39	28.48	39.25	110.9	56.65	38.25	23.55	48.97	57.68	46.8	42.15	40.09	56.27	48.98	22.14	55.34	33.98	68.24	49.79	46.09	35.85	15.68	26.49	11.49	46.16	44.16	41.38	34.5	25.23	19.54	30.27	17.12	38.55	22.13
64598	MOSPD3	54.04	58.03	56.92	37.69	46.89	47.57	28.5	76.06	29.45	31.87	48.69	31.16	20.28	26.2	35.01	32.87	47.1	43.56	35.06	34.54	29.43	31.68	30.86	28.02	22.17	81.15	17.4	32.14	39.11	26.37	16.2	34.81	38.54	33.72	24.25	22.01	35.82	77.22	29.66	23.54	27.01	31.91	43.89	21.2	29.39	29.26	35.26	41.7
6891	TAP2	43.51	78.09	55.26	61.53	55.06	139.66	33.35	76.49	85.41	75.82	61.3	42.64	39.16	79.67	33.75	54.85	67.04	114.61	27.8	79.78	95.25	59.66	21.42	63.41	63.94	61.36	29.14	70.74	38.86	31.31	136.98	102.65	28.07	48.69	52.8	210.84	40.51	55.56	27.01	34.33	49.01	65.02	38.48	138.41	42.58	109.59	25	64.9
7485	GET1	10.69	11.7	8.15	11.23	6.47	22.1	22.78	20.42	10.55	10.67	10.11	22.18	22.64	23.55	14.04	9.23	9.47	14.55	33.38	18.44	7.64	19	31.62	14.5	23.43	4.9	32.38	13.99	12.36	37.95	11.64	13.35	22.68	9.81	9.61	6.49	10.37	7.68	28.94	13.85	18.22	19.42	12.34	7.39	22.3	8.41	17.49	7.91
622	BDH1	75.49	106.51	77.56	65.39	77.15	64.25	50.71	87.86	84.35	74.95	127.19	100.43	70.39	52.52	99.6	111.62	103.7	87.08	50.28	58.99	148.59	86.94	74.6	88.16	40.79	150.55	86.1	88.02	129.05	82.17	107.69	167.1	62.74	172.02	92.24	101.81	133.83	109.21	40.29	75.08	126.93	39.7	107.15	71.37	62.55	126.92	114.4	122.53
55658	RNF126	54.82	73.35	63.17	65.7	84.54	74.79	51.94	150.91	101.75	151.73	78.51	67.07	34.5	136.71	66.01	60.52	75.04	83.12	57.24	72.74	75.81	50.65	43.61	51.42	44.79	118.16	51.54	83.48	68.92	42.16	84.16	95.05	48.86	56.62	84.33	83.76	67.53	100.77	45.71	45.9	63.9	48.31	55.36	62.11	46.53	99.2	37.48	83.26
286223	C9orf47	7.34	0.64	5.11	10.22	3.04	3.91	35.5	1.96	4.11	1.55	3.13	25.34	57.71	1.92	12.55	3.33	6.75	2.88	59.52	13.1	2.93	15.73	42.9	10.34	25.31	3.02	25.17	1.16	1.46	70.66	2.55	1.27	30.87	1.68	15.95	1.57	15.5	2.05	35.2	32.84	41.8	30.39	1.84	1.22	12.01	1	37.59	4.95
92558	BICDL1	20.16	44.76	36.47	13.4	27.19	7.56	2.48	94.12	22.61	19.97	72.21	20.67	4.86	12.98	29.6	15.11	40.24	26.43	2.91	16.07	139.54	53.18	3.54	13.74	3.04	17.21	5.32	58.52	40.8	5.18	58.85	79.42	12.65	8.2	38.41	19	40.87	15.06	2.37	6.83	45.23	5.82	41.33	22.54	7.2	71.55	3.42	44
1020	CDK5	11.08	24.16	10.35	17.31	12.82	22.39	11.77	20.45	16.57	17.31	13.35	15.49	8.92	13.43	12.24	14.99	15.32	15.69	10.02	19.55	7.85	14.92	7.52	6.46	9.79	15.59	6.51	27.38	9.95	7.77	7.97	13.18	8.05	12.01	4.39	14.23	7.63	21.77	9.04	9.99	6.61	10.13	14.64	18.2	7.84	25	8.55	20.19
10786	SLC17A3	0	0	0	0	0	0	0.24	0	0	0	0	0	0	0	0	0	0	0	0	0	0	0	0	0.36	0	0	0	0	0	0.34	0	0	0.54	0	0.27	0	0	0	0	0	0	0	0.25	0.53	0	0	0	0
10246	SLC17A2	0.27	0	0	0	0	0	0	0	0	0	0	0	0	0	0	0	0	0	0	0	0	0	0	0	0	0	0	0	0	0	0	0	0	0	0	0	0	0	0	0.37	0	0	0	0	0	0	0	0
157848	NKX6-3	0	0	0	0	0	0	0	0	0.29	0.25	0	0	0	0	0.33	0	0	0	0	0	0.66	0	0	0	0	0	0	0	0	0	0.75	0	0	1.67	0.29	0	0	0	0	0	0.36	0	0	0	0	0	0	0
8611	PLPP1	74.41	54.98	70.58	54.1	53.57	63.83	134.51	50.33	67.93	33.15	43.52	84.09	138.61	37.34	97.33	35.58	60.85	59.76	132.1	113.09	30.27	91.15	134.08	162.6	149.64	72.41	112.1	50.85	47.67	117.61	60.5	27.18	99.79	35.45	84.28	23.36	45.84	17.49	129.67	128.38	77.66	105.98	47.86	35.92	129.06	28.54	125.59	26.88
27235	COQ2	15.82	17.69	18	14.83	22.78	21.08	9.81	21.59	18.07	26.27	22.65	17.74	14.49	14.28	15.1	14.89	20.62	21.13	10.78	19.27	12.42	9.88	11.49	8.54	12.07	7.2	11.05	21.9	20.08	10.89	12.41	31.63	13	26.79	18.83	18.62	12.62	10.45	12.25	13.64	15.62	16.33	17.62	24.73	18.16	18.58	7.46	15.88
642446	TRIM64B	0	0	0	0	0	0	0	0	0	0	0	0	0	0	0	0	0	0	0	0	0	0	0	0	0	0	0	0	0	0	0	0	0	0	0	0	0	0	0	0	0	0	0	0	0	0	0	0
8642	DCHS1	36.97	15.45	29.23	51.82	20.53	35.93	43.88	15.74	20.36	11.49	14.46	52.06	53.24	12.97	43.37	52.64	17.98	27.76	49.6	54.01	12.18	32.81	42.21	50.32	45.37	9.32	65.32	9.51	13.98	65.89	17.3	5.17	46.24	54.74	28.44	10.36	28.95	11.47	47.7	58.48	46.73	62.06	14.68	14.57	45.49	5.2	61.98	13.05
140873	C20orf173	0	0	0	0	0	0	0	0	0.5	0	1	0.86	0.83	0	0	0	0	0.56	0	0	0	0	0	0	0	0	0	0	0.44	0	4.3	0	0	0	0	0	0	0	0	0	0	0	0	0	0	0	1.81	0
314	AOC2	3.11	2.17	2.34	4.1	1.76	3.7	2.13	6.34	4.47	7.94	5.8	3.76	3.33	4.84	3.84	4.93	8.36	3.82	1.55	3.78	3.8	5.5	3.95	4.37	3.2	7.37	4.34	7.01	2.64	4.67	8.15	8.22	2.26	5.09	3.51	2.88	6.62	3.44	1.54	3.6	3.95	1.86	1.7	1.1	2.1	20.83	3.6	4.98
129684	CNTNAP5	0.04	0.28	0	0.23	0	0.04	0.35	0.07	0.26	0	0.13	0.16	0.11	0.27	0.44	0.1	0.11	0.09	0.04	0.1	0.05	0.06	0.2	0.17	0.24	0	0.11	0.26	0.08	0.16	0.14	3.24	0.13	0	0	0	0.06	0	0.08	0.06	0.05	0.04	0	0	0.04	0.06	0.05	0.13
5834	PYGB	172.42	89.29	164.21	154.83	183.69	70.77	693	144.04	144.27	386.8	115.9	285.86	301.76	72.34	212.23	87.6	124.23	101	850.92	231.7	170.08	206.11	493.86	68.37	498.62	310.77	515.83	76.05	100.78	527.82	45.35	91.24	397.27	148.4	160.97	273.42	155.46	442.69	575.49	339.26	376.03	321.24	110.33	99.63	198.37	97.92	250.76	134.39
644524	NKX2-4	0	0	0	0	0	0	0.25	0	0	0	0	0	0	0	0	0	0	0	0	0	0	0	0	0	0	0	0	0	0	0	0	0	0	0	0	0	0	0	0	0	0	0	0	0	0	0	0	0
5409	PNMT	1.94	1.11	0.87	0.55	1.68	0.53	2.34	3.99	1.57	0.45	1.05	1.82	1.86	0.87	2.27	1.15	0	0	1.79	1.87	0.59	0.6	2.96	2.77	1.43	1.38	5.77	3.07	0.91	1.31	1.2	0	3.17	0.68	0	0.67	5.29	0	1.39	0.67	2.47	0.95	2.98	0	0.94	0.66	0	1.03
22821	RASA3	27.9	21.95	28.59	57.3	19.54	36.53	42.57	13.15	41.16	18.75	17.86	58.56	49.67	19.19	27.69	34.6	35.51	43.74	40.99	54.88	27.14	35.64	48.17	69.68	37.12	24.24	47.06	12.49	13.23	59.03	99.26	8.7	33.49	27.18	22.9	14.4	31.33	10.4	56.18	49.88	43.85	50	16.33	31.37	43.69	10.13	56.14	16.53
440804	RIMBP3B	0.12	0.38	0.33	0.64	0	0.16	0.1	0	0.21	0	0.63	0.17	0.13	0.21	0	0	0	0.24	0.1	0.31	0.26	0	0	0	0	0.27	0	0	0	0	0.96	0	0	0.17	0	0.13	0.14	0	0	0	0.14	0.12	0	0.26	0.27	0	0	0
56891	LGALS14	0	0.61	0	0.48	0.45	2.67	0	0	0.61	1.45	0.09	1.49	1.75	0.94	0	0	1.3	0.62	0	1.42	0.98	0.8	1.8	1.03	0	2.32	2.52	1.21	0	0	0	0	0	2.16	0	0	0.31	1.17	0.48	0.95	0	0	0.29	0	0.5	0.7	0.69	0.55
64981	MRPL34	57.91	75.86	83.75	100.87	66.27	59.84	136.36	101.57	63.94	76.17	62.12	71.62	85	71.17	68.42	49.02	64.71	61.37	144.3	94.99	57.31	60.32	105.98	43.21	116.12	93.59	99.38	102.88	56.35	99.11	44.42	114.26	87.22	52.7	63.89	49.54	31.27	34.95	139.95	89.62	59.53	121.58	52.15	94.23	67.25	54.19	72.69	86.54
90321	ZNF766	53.17	73.4	45.08	72.68	39.45	67.33	41.14	55.64	69.96	62.55	70.26	77.48	65.55	53.69	69.04	76.54	89.87	82.16	42.82	46.68	87.59	91.61	75.98	90.82	46.08	112.89	81.97	89.64	67.19	84.21	106.04	63.97	55.43	94.02	71.18	68.03	95.58	85.59	40.69	77.29	96.55	43.62	63.27	46.69	48.43	112.45	86.28	66.77
123606	NIPA1	6.67	9.35	7.74	10.25	8.08	17.42	7.86	19.1	11.12	10.63	6.39	10.56	7.55	21.83	7.98	8.09	10.86	8.68	8.69	12.19	8.85	8.44	8.57	6.98	9.4	3.85	9.01	16.96	5.92	11.46	15.71	10.54	8.4	4.68	6.47	8.67	6.57	6.21	8.76	7.41	6.06	8.01	6.91	7.24	6.71	12.04	10.9	15.76
2568	GABRP	20.2	2.31	97.32	8.35	60.56	0.16	0.14	1.61	9.12	3.37	51.95	12.51	2.42	8.94	13.36	4.37	10.42	2.49	0.27	0.14	8.88	16.1	0.18	0.21	3.69	0.63	0.39	2.1	36.76	0.39	0.2	46.75	11.64	1.87	61.9	1.23	33.81	1.56	0	1.15	17.27	0.58	43.6	2.13	3.86	3.8	0.21	11.64
2581	GALC	15.29	14.42	11.7	12.38	10.74	20.69	17.66	35.97	17.45	6.79	9.09	13.81	17.17	16.26	16.02	12.29	10.66	22.1	12.99	22.36	10.15	17.9	15.55	20.27	14.83	10.02	16.93	19.76	8.92	16.47	15.06	16.31	11.58	20.06	6.81	14.02	5.8	9.65	15.13	12.98	10.87	16.37	7.09	11.93	19.45	6.88	15.41	11.07
8476	CDC42BPA	42.71	21.08	23.48	42.49	20.32	34.35	60.95	43.52	34.58	29.21	19	51.76	64.65	25.69	41.97	32.73	28.56	19.57	66.5	42.07	12.46	40.85	74.7	42.52	72.93	25.66	75.13	5.17	11.78	72.59	5.47	20.27	68.7	35.73	33.33	8.65	28.3	30.37	72.04	68.25	59.76	60.34	52.25	12.27	53.84	34.6	60.17	22.97
51257	MARCHF2	76.25	63.26	78.97	105.42	70.55	79.36	247.46	75.3	70.98	66.78	64.17	179.45	188.6	55.1	112.76	69.88	84.53	90.7	275.83	142.63	68.33	92.04	243.67	92.47	180.84	55.14	176.08	73.6	70.99	187.08	73.69	62.87	152.82	58.18	95.9	50.38	83.36	55.84	219.27	179.39	128.21	207.29	78.15	60.31	122.82	80.66	161.19	70.37
9862	MED24	47.42	52.14	47.18	52.9	40.94	51.37	42.16	63.35	59.57	68.61	50.94	48.33	42.39	50.3	49.72	52.59	50.19	53.34	36.5	50.55	64.5	50.11	39.08	48.98	46.27	75.54	41.45	36.7	46.68	43.61	46.01	62.97	35.98	61.67	46.59	52.04	56.85	68.65	38.18	41.42	56.81	36.44	48.6	55.04	35.34	80.36	41.87	53.68
5329	PLAUR	43.49	97.8	27.43	123.93	36.11	103.33	105.31	41.27	88.62	64.52	39.34	72	158.28	168.48	41.17	126.1	102.46	189.73	53.86	94.24	64.68	88.37	47.44	153.71	46.36	75.48	72.77	149.14	25.9	37.59	48.18	68.3	58.32	65.82	71.96	165.59	46.38	60.93	43.56	91.89	76.24	99.2	32.33	110.73	121.78	80.09	65.55	73.2
1200	TPP1	71.9	102.55	79.59	122.07	57.05	131.32	86.81	70.07	119.93	94.42	72.68	117.12	111.14	85.79	73.25	80.38	89.29	123.6	86.47	185.42	66.24	96.15	85.57	149.44	150.62	105.53	103.02	60.53	52.06	89.59	138.71	85.91	70.78	68.54	61.96	63.67	53.58	55.44	76.2	87.73	67.3	183.86	38.03	65.77	101.83	37.57	139.05	63.17
55503	TRPV6	4.47	4.04	3.61	0.52	5.75	0.51	0	2.4	0.83	0.43	7.51	0.61	0.79	1.11	4.19	0.55	2.56	0.37	0	0.15	1.52	1.91	1.19	0.22	0.15	1.31	0.2	1.95	8.43	0.42	0.64	0.28	1.34	3.25	5.11	0	2.17	0.19	0.15	0	6.83	0	5.01	0	1.79	0	0	1.97
3029	HAGH	53.97	59.3	38.36	51.59	41.75	53.74	61.94	59.7	53.2	55.55	51.94	70.86	56.08	36.37	71.15	48.16	64.41	60.12	86	60.82	63.55	61.21	73.06	66.29	67.65	64.92	81.29	56.12	50.53	73.11	62.56	43.16	53.46	59.43	51.38	35.92	59.13	57	68.63	69.17	77.31	64.54	50.87	31.86	53.37	55.39	82.39	45.83
27077	B9D1	27.18	34.16	27.58	25.73	29.12	32.96	29.22	37.44	33.73	53.3	41.27	36.07	27.78	33.07	31.44	18.68	34.79	26.51	29.91	27.3	17.57	22.47	33.09	22.79	26.04	39.04	35.8	26.71	46.68	31.15	8.77	16.82	28.31	60.71	27.16	23.89	41.17	83.39	25.66	22.3	43.25	22.88	23.85	26.32	23.54	50.69	39.43	27.99
10434	LYPLA1	66.66	119.68	77.4	47.37	78.46	95.52	35.03	151.92	60.06	55.54	81.73	55.04	29.69	124.01	50.09	53.11	78.87	66.48	34.59	58.52	90.82	83.88	29.98	37.07	38.26	63.08	38.23	104.44	62.02	43.04	50.7	77.95	40.42	40.25	61.02	52.32	49.58	67.42	35.58	20.97	23.82	39.09	66.26	71.04	23.71	118.35	26.46	91.64
219855	SLC37A2	82.95	141.93	101.83	98.84	84.87	114.01	56.21	74.69	115.98	125.62	138.45	128.85	104.08	117.2	114.63	112.14	118.02	138	63.27	79.91	144.34	148.08	100.03	127.3	74.06	147.96	110.62	133.59	113.28	111.08	140.62	103.13	71.59	161.02	81.01	98.24	132.2	137.8	49.82	78.19	130.81	100.56	93.82	67.87	68.77	135.15	119.71	101.06
145447	ABHD12B	6.02	11.46	4.51	5.58	3.06	6.13	4.76	1.32	5.19	4.77	5.33	8.86	4.98	7.41	9.87	5.56	10.69	4.83	5.75	2.96	4.75	8.98	6.34	8.08	3.04	8.02	11.41	9.54	3.99	11.24	4.31	4.33	1.72	8.5	5.26	3.93	3.29	6.64	3.39	3.45	10.14	3.4	2.2	4.29	2.79	17.55	6	4.79
283710	LOC283710	3.59	15.6	4.44	2.23	2.68	1.9	0	2.94	9.51	3.37	2.31	10.57	2.82	0	3.91	1.11	30.41	26.41	1.32	5.5	8.11	3.38	0.88	28.81	0.48	0.63	2.21	8.16	0.93	0.66	26.03	2.82	0.75	2.11	0	0	0	0.53	0.47	1.1	5.06	0.96	11.32	2.81	3.16	0	0.68	0
8330	H2AC15	23.54	44.19	35.73	19.7	35.32	24.67	3.42	55.12	68.99	44.6	23.44	13.49	2.95	21.35	20.49	39.52	32.03	24.69	8.23	19.22	34.72	8.09	0	20.17	9.43	22.63	4.01	20	31.22	2.7	18.21	44.65	6.2	60.09	21.01	21.25	4.48	30.19	1.9	0	12.05	5.07	7.82	65.61	19.91	24.41	1.37	9.93
158038	LINGO2	2.8	5.67	2.42	4.54	1.74	4.2	2.29	2.23	3.29	3.41	3.5	4.62	4.48	3.4	4.5	5.31	5.81	4.45	2.68	2.59	5.16	4.25	4.16	6.25	3.21	7.32	4.25	4.85	4.04	4.03	6.13	4.09	3.09	5.15	3.97	3.43	5.78	6.37	2.76	4.99	5.9	3.21	3.72	2.93	2.96	6.42	5.46	4.2
4129	MAOB	39.17	9.74	30.23	20.18	22.08	13.23	129.66	10.42	14.44	3.21	21.89	56.52	84.87	2.12	48.12	8.46	17.48	9.97	157.51	62.33	5.2	39.58	158.05	15.25	112.95	6.92	108.13	17.36	14.68	140.33	2.42	1.32	84.15	0.25	38.22	0.75	20.1	2.4	155.59	70.24	66.14	94.58	11.77	1.53	34.53	1.22	90.46	7.88
2492	FSHR	0.78	0.07	0.15	0.1	0.32	0.15	0.27	0.09	0.12	0.23	0.14	0.56	0.99	0.08	1.03	0.46	0.46	0.47	0.05	0.07	0.11	0.11	0.17	0.56	0.04	0.21	1.45	0.15	0.88	2.35	0.17	0.09	0.44	0.11	0.48	0.23	0.4	0.15	0.26	0.47	0.96	0.21	0	0	0.18	0.12	3.05	0.12
22899	ARHGEF15	19.3	5.65	14.52	20.99	12.14	16.09	37.03	8.38	12.54	6.22	9.74	22.09	36.52	5.36	20.46	13.92	11.31	15.64	19.97	31.87	9.48	15.97	22.67	40.15	26.42	5.98	25.75	4.9	8.46	21.19	7.9	4.37	21.09	3.32	19.23	2.09	15.55	3.49	22.57	37.97	26.69	30.14	8.58	8.23	23.51	4.97	27.54	10.02
64854	USP46	15.25	14.56	14.91	12.01	13.65	16.99	9.59	24.48	12.86	11.97	18.82	14.32	11.85	10.47	18.44	14.07	15.07	13.74	9.02	11.06	15.71	20.13	14.05	15	10.33	18.85	16.56	16.96	15.67	14.66	16.21	20.44	15.03	27.84	13.16	14.42	23.7	15.92	8.05	10.01	14.85	9.69	16.39	7.38	8.96	14.24	13.38	13.02
57678	GPAM	5.16	4.61	4.39	4.09	4.41	7.46	7.75	8.3	6.26	6.66	5.06	5.53	6.77	3.59	7.57	5.46	5.78	4.6	8.78	5.84	4.86	8.55	5.91	5.49	8.6	5.44	7.56	6.08	4.32	9.8	6.01	11.78	6.53	8.99	3.58	7.63	3.05	3.03	8.92	7.24	4.86	5.65	5.21	2.52	5.05	12.74	8.42	5.64
79039	DDX54	33.87	50.46	38.47	47.34	39.02	43.57	31.76	68.76	64.24	97.38	53.37	37.09	32.36	73.82	35.39	38.66	52.31	44.56	36.26	43.24	55.53	40.83	30.04	33.36	31.62	52.42	29.07	59.61	32.31	28.88	45.99	64.62	29.15	55.5	34.27	79.69	28.27	62.64	32.34	38.06	35.24	35.38	28.75	41.29	28.9	120.62	36.42	45.48
493861	EID3	5.28	6.38	8.11	28.76	5.66	7.89	12.31	28.45	12.76	9.89	11.79	43.5	32.54	4.21	7.67	7.38	22.32	12.3	10.64	12.87	15.59	20.13	25.12	16.01	15.33	25.14	15.61	18.08	8.49	17.64	7.32	21.57	23	16.56	21.92	6.46	24.09	79.12	18.98	52.93	38.35	22.15	4.59	5.28	16.2	48.77	33.2	23.47
124220	ZG16B	65.02	1.93	40.73	0	16.19	0	0	0	102.1	10.06	5.52	0.75	14.45	7.14	53.03	0	63.3	11.54	0	0	2.08	8.58	0	0	0.56	8.83	0	2.15	0	0	0	12.92	0	0.79	0	1.57	0.8	0.68	0	0.78	676.9	1.1	17.25	4.81	213.57	0.77	0	4.21
9274	BCL7C	73.83	95.56	71.52	70.5	79.74	100.78	86.68	146.17	71.72	116.53	79.98	90.21	72.95	125.96	80.9	83.82	75.92	115.25	108.04	99.06	52.8	73.32	82.24	52.09	79.27	67.77	71.75	89.19	76.34	88.11	61.63	89.79	81.73	126.46	59.83	79.2	51.22	65.02	93.62	62.14	70.06	108.08	54.53	56.77	75.11	55.33	72.69	54.77
55717	WDR11	31.21	20.17	27.94	30.82	24.5	30.98	21.87	31.78	57.76	97.51	26.96	32.52	33.07	28.33	29.74	24.26	29.44	26.41	23.76	34.26	29.32	27.79	27.51	37.44	27.87	34.72	29.13	27.74	28.64	33.01	44.93	47.7	36.98	48.15	28.31	30.01	32.35	25	28.57	28.99	26.76	26.46	30.72	26.79	27.12	59.75	29.05	26.07
441024	MTHFD2L	22.78	21.19	14.82	13.23	18.31	26.07	17.91	22.48	27.55	28.74	23.29	30.53	25.31	15.64	27.36	18.91	33.46	32.47	19.16	17.5	23.14	33.45	18.5	23.07	22.37	28.59	21.85	24.03	19.14	26.08	37.66	26	25.59	44.92	19.44	21.08	26.34	21.54	16.7	19.47	29.45	22.42	23.47	21.37	11.39	36.28	23.89	20.34
9730	DCAF1	24.26	33.98	24.25	24.35	24.56	22.34	20.57	28.63	33.12	31.12	24.95	28.42	22.24	24.37	22.71	16.6	30.11	27.66	23.07	26.58	23.9	23.46	25.8	25.43	26.04	24.07	27.13	24.18	22.68	22.66	38.47	22.64	26.85	29.06	24.14	18.98	26.31	19.95	27.47	27.3	30.63	29.46	18.36	13	17.97	43.34	30.51	23.6
55629	PNRC2	65.3	64.52	65.6	46.83	54.47	67.81	79.79	82.89	69.14	46.15	50.85	76.03	94.82	45.49	70.08	51.56	71.78	66.29	106.57	98.6	58.35	72.86	81.3	83.14	115.89	58.05	90.46	86.52	43.34	101.74	106.25	100.04	100.46	66.04	66.27	34.29	49.46	38.45	105.43	73.26	78.2	111.32	48.64	53.52	73.48	46.42	76.93	62.88
27091	CACNG5	6.79	11.48	6.95	11.32	6.93	10.65	5.93	7.31	7.94	7.32	12.48	12.29	13.11	6.72	13.31	12.02	14.93	12.27	6.33	7.11	16.74	14.79	11.25	14.47	6.62	18.54	13.27	15.18	10.79	13.67	21.62	7.72	7.51	16.3	9.99	9.69	12.15	11.64	5.65	9.37	15.2	6.39	9.36	6.8	7.85	14.31	15.25	9.28
6623	SNCG	92.27	4.97	71.24	19.77	50.81	8.65	53.59	22.83	41.76	14.01	38.5	37.86	64.47	132.71	64.58	11.1	18.08	25.42	54.8	40.37	17.7	30.07	13.6	40.13	48.57	10.61	54.37	10.25	62.89	53.14	12.96	5.12	75.35	10.49	39.97	13.82	117.71	9.78	42.86	32.8	35.95	32.26	61.97	14.56	130	1.69	11.24	49.09
57614	RELCH	48.32	45.09	55.75	32.88	67.52	32.66	21.04	50.51	33.64	18.66	73.92	43.73	24.21	26.67	48.94	39.93	55.1	36.16	20.03	28.7	80.49	31.09	22.12	40.81	22.85	37.57	27.12	47.38	66.18	25.5	57.11	65.59	41.27	25.32	81.27	31.73	100.94	48.03	19.45	21.86	53.94	22.63	71.09	23.37	34.94	36.79	24.57	50.37
51133	KCTD3	45.72	37.46	43.32	39.76	40.8	26.8	41.59	58.56	39.22	35.29	43.72	43.69	41.81	28.4	48.99	26.05	40.8	30.18	49.59	39.44	30.97	37.4	45.2	23.39	51.09	20.31	45.88	25.34	41.67	46.32	6.19	40.54	54.11	43.34	57.9	16.34	63.04	35.09	50.72	41.45	39.62	42.16	58.15	24.07	32.17	26.02	40.11	38.2
1269	CNR2	66.91	87.86	71.38	82.21	52.5	76.06	40.25	49.15	80.87	59.71	98.02	89.71	77.48	47.03	93.18	84.3	125.27	79.82	43.76	58.39	135.22	99.61	84.27	124.68	44.22	122.98	91.11	111.29	88.11	83.79	206.44	63.73	58.09	114.97	80.37	82.29	100.44	100.85	44.75	79.84	113.05	53.55	72.62	53.97	61.37	123.77	99.59	74.4
60386	SLC25A19	37.89	58.99	34.45	50.43	33.78	52	33.7	43.2	57.53	48.04	49.87	61.13	55.87	45.04	46.79	44.13	60.66	70.79	46.99	43.85	68.96	60.29	59.59	73.43	37.81	101.24	60.3	67.86	46.46	56.76	101.12	48.16	35.51	60.81	52.44	57.46	66.99	53.36	38.76	58.37	78.88	33.76	43.16	36.28	42.49	82.14	64.46	51.99
8620	NPFF	22.64	25.69	6.23	1.36	3.69	14.92	4.43	4.1	4.6	15.15	13.81	17.86	7.25	7.17	12.25	10.78	10.78	7.66	5.17	10.25	9.72	20.46	16.25	13.26	4.46	9.06	14.07	17.05	16.61	20.14	22.62	5.91	6.66	5.62	8.95	2.58	5.4	6.8	6.09	7.51	14.22	3.53	7.35	5.52	2.87	16.17	13.9	4.58
653075	GOLGA8T	5.23	2.12	4.84	3.81	3.19	4.6	2.89	1.92	4.37	2.08	4.09	7.19	4.38	1.43	5.26	4.23	4.86	1.9	3.06	2.76	3.58	6.51	5.8	9.09	4.28	1.15	6.2	1.67	4.98	4.67	5.14	0.72	3.89	3.05	2.35	2.26	5.1	1.74	2.27	3.55	4.47	2.98	3.2	0.95	3.34	3.84	5.22	1.46
3344	FOXN2	16	21.74	13.57	16.34	12.9	23.19	12.2	13.61	31.01	20.74	13.9	15.76	12.01	8.82	12.02	12.57	21.65	17.86	15.32	23.51	20.93	21.62	12.57	16.71	20.95	18.12	15.86	26.32	7.57	20.02	33.04	28.98	18.57	15.65	16.26	22.63	7.22	18.98	15.77	11.13	11.72	18.52	9.01	23.73	16.32	23.64	12.7	27.34
553	AVPR1B	0.35	0.4	0.08	0	0	0	0.09	0.08	0	0	0.1	0.35	0	0.08	0.33	0	0.12	0	0	0.09	0	0.12	0	0.38	0	0	0.12	0.22	0.09	0	0.61	0.08	0	0.12	0.19	0	0	0	0	0	0	0	0.09	0	0	0	0	0
100130519	TMEM221	1.78	0.51	0.6	1.33	1.54	0.74	0.86	1.62	2.86	4.96	0.96	0.88	0.57	2.86	2.42	2.11	0.92	1.26	1.36	1.71	1.44	0.92	3.53	1.91	1.54	0.32	2.72	1.69	1.24	2.7	1.54	0.54	1.94	2.06	0	0.41	1.24	1.42	1.27	0.81	1.19	1.44	1.16	0	0.85	0.3	2.83	0.95
8576	STK16	19.92	21.18	15.07	16.6	19.23	29.3	14.64	24.12	17.83	12.05	16.51	18.24	15.26	24.39	19.55	18.26	12.81	24.43	20.5	18.83	17.54	14.42	16.98	19.34	19.17	38.53	16.76	18.16	18.27	19.9	21.52	13.84	12.15	26.94	16.08	10	11.29	19	15.44	13.61	12.82	18.09	17.73	18.7	15.01	10.58	12.57	15.22
8621	CDK13	64.06	87.61	63.7	67.16	60.11	70.83	48.32	69.72	71.13	60.63	69.82	64.1	51.02	63.66	72.2	57.62	104.69	79.22	66	65.7	77.3	68.57	61.22	76.04	56.4	88.26	64.71	109.24	61.92	65.84	89.66	61.57	55.24	61.8	69.61	61.5	81.82	86.81	53.55	65.52	83.63	58.05	77.03	45.85	68.33	95.46	66.49	67.75
54414	SIAE	26.55	34.14	26.31	26.96	25.57	25.55	23.63	28.21	34.12	29.97	35.28	41.09	38.29	26.21	34.9	27.51	34.88	32.97	21.48	27.36	33.24	36.74	29.01	45.44	29.06	45.51	34.44	34.09	31.26	40.49	40.21	15.61	24.71	28.09	29.1	21.39	39.37	23.92	22.03	34.02	33.61	25.8	29.18	16.35	27.86	29.23	41.08	27.16
222256	CDHR3	14.12	19.31	15.28	21.31	13.31	20.7	43.49	12.07	21.14	19.37	24.41	37.55	26.31	9.84	28.06	21.27	30.28	25.17	25.97	17.75	26.86	28.45	34.47	26.73	21.58	27.33	57.57	25.74	20.29	23.82	31.14	16.44	35.94	24.1	20.18	19.69	21.51	20.94	15.14	28.68	97.02	35.62	21.3	11.27	15.76	30.09	24.2	16.09
57117	INTS12	19.71	17.59	11.32	19.03	16.85	23.02	20.43	31.14	17.3	20.07	17.03	20.75	13.87	28.1	15.51	19.68	18.55	17.48	24.07	17.34	12.59	21.67	9.9	18.4	25.37	15.23	24.17	13.73	13.82	16.99	15.68	22.44	18.04	13.22	11.91	11.88	12.08	13.1	23.45	13.85	16.1	22.33	12.09	20.63	15.18	12.5	15.86	10.03
81542	TMX1	23.38	34.21	19.57	29.3	20.72	46.55	19	23.06	32.96	31.61	27.45	27.86	23.62	32.34	27.38	28.71	35.69	30.4	18.84	29.88	31.28	29.2	21.31	28.83	19.26	48.1	27.74	44.32	23.65	24.5	37.37	47.09	19.56	34.66	18.19	27.58	17.74	32.73	16.79	18.16	20.92	22.18	26.52	33.75	19.14	48.08	26.06	23.16
4626	MYH8	0.29	0	0	0.17	0	0.24	0.24	0	0.16	0.11	0	0	0	0	5.51	0.95	0	0.09	0	0	0	0	0	0	0.07	0	0	0.19	0	0	0	0	0	0	0	0.2	0	0.1	0	0	0	0.09	0	0	0	0	0.1	0
8447	DOC2B	38.26	22.97	33.79	25.65	31.07	23.36	52.4	26.7	29.89	18.47	68.76	44.81	51.5	10.43	47.39	31.92	45.78	40.89	22.35	32.42	70.17	61.54	27.06	35.98	22.83	76.36	44.38	52.93	25.14	28.03	23.89	78.02	35.32	47.2	43.95	12.76	60.15	16.01	30.7	40.03	32.7	26.11	19.81	23.58	28.28	52.78	36.11	56.77
8028	MLLT10	44.95	50.77	38.59	45.94	42.4	43.66	38.73	48.27	45.43	39.49	45.83	52.87	46.96	33.79	46.82	47.42	59.47	48.66	34.21	41.21	68.65	65.4	51.05	54.81	46.36	44.44	53.35	51.72	47.31	53.95	50.17	51.03	43.13	54.34	41.75	36.13	54.83	48	42.65	41.69	60.28	35.01	44.69	35.19	38.75	48.4	60.38	45.31
6804	STX1A	6.53	42.66	4.37	23.55	7.62	21.19	7.47	16.34	11.29	13.69	7.84	14.92	10.07	16.51	7.98	17.66	9.22	22.43	9.18	7.43	13.08	12.44	12.17	12.39	13.43	32.77	12.67	37.59	4.71	10.58	6.54	8.43	4.77	13.15	2.97	14.24	10.54	34.38	6.82	11.53	19.68	8.7	19.16	26.87	3.39	24.21	11.94	21.72
26003	GORASP2	68.21	96.53	68.05	93.03	74.1	81.97	49.13	112.67	104.4	127.79	68.63	76.39	51.66	88.86	58.53	81.92	96.37	101.38	59.13	93.78	78.18	79.07	56.52	72.77	66.02	70.83	55.22	76.5	50.66	57.22	56.59	115.16	51.45	89.05	62.63	47.42	34.37	60.68	57.86	55.24	44.13	47.63	49.47	52.59	48.37	56.78	59.02	67.17
10541	ANP32B	79.55	87.56	73.56	84.29	76.48	145.45	86.69	151.64	143.8	208.87	82.26	94.95	62.78	117.55	76.56	84.27	92.12	80	85.89	118.7	75.95	72.01	82.81	54.53	87	96.38	85.7	111.92	75.25	82.63	139.26	218.9	97.35	125.36	68.97	164.8	70.6	146.83	80.04	86.39	91.1	81.33	63.79	100.5	58.16	66.1	83.57	81.39
7274	TTPA	1.65	2.89	1.03	2.08	1.51	2.15	2.04	1.27	2.69	2.75	2.65	1.98	3.37	1.77	3.85	3.95	3.87	2.99	1.72	0.88	6.11	3.09	3.86	5.53	1.91	1.64	2.65	3.24	3.77	5.44	5.33	2.14	1.91	4.42	4.1	1.12	3	2.81	0.64	2.08	5.56	3.17	3.18	2.12	2.98	2.09	4	0.48
81616	ACSBG2	0.54	0.93	0.55	1.38	0.18	0.45	0.67	0.94	0.44	1.34	0.58	1.08	1.86	1.11	2.17	0.24	1.44	0.25	1.83	0.59	1.75	1.74	1.15	0.6	1.03	0	2.75	0	2.79	1.94	0.85	1.12	1.17	1.15	1.11	0	0.3	0.49	0.2	0.85	2.03	0.53	1.51	0	0.39	0.55	0.57	0.43
378951	RBMY1J	0	0	0	0	0	0.66	0	0	0	0	0	0	0	0	0	0	0	0	0	0	0	0	0	0	0	0	0	0	0	0.22	0	0	0	0	0	0	0	0	0	0	0	0	0	0	0	0	0	0
51015	ISOC1	26.99	15.92	21.16	26.28	24.02	15.15	63.87	18.76	17.86	13.73	19.43	36.58	42.51	19.32	34.17	11.88	16.4	14.24	84.02	46.64	12.82	32.09	63.33	7.33	71.88	9.25	64.61	21.2	23.98	57.88	17.74	18.07	65.89	20.89	29.61	6.77	15.75	4.78	52.64	37.72	46.22	67.52	18.32	7.91	20.23	14.49	54.59	19.31
23552	CDK20	6.92	3.56	5.67	9.86	5.36	6.64	10.75	5.95	3.18	1.96	6.22	6.18	6.37	9.57	8.39	3.43	3.77	3.75	11.39	5.36	3.55	5.5	12.11	5.81	15.62	6.96	11.61	7.9	4.41	9.94	3.4	19.05	6.72	11.74	5.61	4.56	6.81	2.03	7.88	11.5	10.05	10.25	6.36	1.73	6.99	10.26	7.39	3.24
147409	DSG4	3.91	5.5	2.63	2.27	12.11	1.21	0.08	0.25	1.62	1.14	11.66	1.26	0	0.09	4.82	2.58	3.58	1.45	0.09	0.09	4.57	0.46	0.21	0.12	0.16	0.24	0	1.55	8.62	0	0.12	3.74	4.81	1.84	7.75	0.9	12.8	1.54	0.08	0	1.84	0.18	5.5	2.11	0.36	0.11	0.11	6.81
5322	PLA2G5	12.82	2.78	14.11	8.24	9.89	5.12	33.87	3.68	1.54	0.33	1.93	14.3	15.47	1.41	5.36	0.85	2.95	2.22	26.33	8.43	1.59	2.95	22.86	12.23	34.22	0	27.47	0.68	3.37	29.88	4.84	0.65	14.74	2.21	12.67	0.55	7.03	3.01	28.89	18.25	9.08	12.52	1.54	0.76	13.86	0.48	24.71	1.66
339451	KLHL17	7.71	8.48	6.43	18.68	8.67	11.27	5.41	6.61	9.04	11.43	14.11	10.94	6.07	11.99	8.58	18.91	11.26	13.1	8.08	9.85	32.75	9.21	8.99	6.88	5.01	23.81	10.46	23.93	11.9	6.13	15.91	26.08	8.87	20.25	11.7	10.89	18.78	17.59	7.68	8.64	17.38	4.27	20.61	14.41	10.65	15.64	10.41	23.21
4321	MMP12	6.96	14.45	1.57	21.32	8.62	202.65	0	17.29	22.83	8.14	19.39	9.19	1.59	356.74	1.53	20.36	7.21	132.69	0	28.25	18.24	65.78	0	2.85	0	23.63	0.33	118.81	0.78	0.67	18.94	53.34	0.27	32.4	5.58	159.47	1.75	10.8	0.47	4.82	2	2.43	0.73	183.15	0.72	36.99	0	34.63
203074	PRSS55	4.3	7.72	5.59	3.07	3.44	6.99	1.55	3.58	4.96	0.01	8.12	5.76	6.83	3.38	7.07	7.21	7.14	7.53	2.53	3.89	8.32	7.61	5.22	12.08	2.77	5.75	5.72	6.18	9.76	4.06	12.38	1.63	3.17	6.42	4.38	5.03	6.43	5.33	2.28	5.2	10.36	1.39	3.46	1.29	2.12	5.36	2.14	4.14
10695	CNPY3	45.01	82.66	63.54	53.94	43.93	83.3	42.12	100.73	73.81	50.32	50.5	59.99	46.33	51.62	36.53	38.03	63.21	83.17	51.24	100.49	67.37	60.23	43.59	76.42	61.28	62.19	48.42	63.64	37.2	45.32	137.67	88.53	40.54	82.83	46.24	53.5	28.29	57.13	45.51	45.67	55.92	76.73	34.34	45.67	70.93	66.16	42.91	33.91
400954	EML6	13.57	10.97	13.06	15.95	12.05	22.98	13.16	9.6	18.03	13.28	12.69	18.49	19.93	10.05	15.55	14.89	18.77	16.03	12.01	16.73	28.84	19.48	14.33	15.5	17.28	25.04	13.25	27.21	9.84	14.61	13.38	11.58	17.43	15.49	24.18	12.08	11.09	10	14.37	16.49	16.26	17.88	10.31	14.44	12.23	32.52	19.13	13.23
2960	GTF2E1	24.5	34.43	22.21	37.12	20.52	30.63	20.49	38.77	41.79	57.53	33.42	41.11	31.02	47.2	26.98	39.4	44.57	37.11	20.97	26.61	42.84	36.75	32.73	43.2	24.24	50.14	32.78	39.04	28.94	36.58	42.71	39.45	28.15	44.93	25.02	24.76	31.16	37.2	17.28	26.7	41.66	28.34	28.8	26.37	27.45	55.17	40.34	33.58
10086	HHLA1	0	0	0	0	0	0.12	0	0	0	0	0	0	0	0	0	0	0	0	0	0	0	0	0	0	0	0	0	0	0	0	0	0.1	0.12	0	0	0	0	0	0	0	0	0	0	0	0	0	0	0
339318	ZNF181	10.51	6.02	5.59	4.21	6.22	7.65	13.05	6.45	6.46	8.02	5.27	9.26	9	4.4	8.58	4.74	8.23	4.57	12.6	11.9	3.76	7.01	12.75	7.46	11	6.27	7.45	8.34	5.71	17.21	9.79	8.44	12.02	9.12	8.91	4.57	6.35	4.71	15.26	10.99	10.75	10.98	7.22	3.88	7.18	10.27	11.48	4.55
32	ACACB	49.11	14.68	30.83	27.67	26.14	12.76	101.16	14.89	23.48	11.64	20.24	61.69	74.42	6.67	79.44	16.22	33.34	19.76	105.03	39.14	26.39	39.16	154.11	47.71	88.3	9.66	119.65	23.41	23.36	115.12	21.52	14.23	80.2	23.07	26.38	6.99	30.04	10.65	87.77	60.03	111.63	51.69	51.86	5.53	54.74	23.32	77.39	18.14
25884	CHRDL2	4.51	5.77	27.74	148.95	8.58	27.08	11.1	5.21	38.08	11.85	25.29	129.72	53.12	6.63	34.55	29.99	30.78	78.69	6.28	107.27	13.63	14.44	32.47	8.82	63.72	23.29	3.45	3.77	19.74	37.34	1.25	1.08	4.13	1.83	49.15	3.66	121.22	13.03	81.31	310.63	25.63	204.99	16.8	5.54	38.27	0.64	277.77	72.52
50863	NTM	23.9	22.65	16.39	66.96	14.7	43.3	39.1	22.23	19.45	23.66	16.76	50.85	68.54	28.96	24.74	63.67	15.4	31.14	72.66	40.9	12.16	42.48	72.11	29.8	52.78	21.98	60.4	28.2	13.55	69.09	6.03	7.58	38.12	26.17	27.85	28.12	16.07	22.43	59.69	67.35	39.32	42.58	8.48	30.73	17.99	15.74	51.13	11.67
83999	KREMEN1	167.08	190.47	155.74	164.56	148.4	192.1	88.75	133.34	167.52	171.96	201.93	190.06	133.1	120.84	181.94	177.15	209.71	158.44	88.96	108.35	217.18	202.47	132.93	191.57	80.45	298.35	148.17	206.51	213.08	140.22	166.96	169.48	123.37	284.03	165.07	158.55	209.69	206.76	79.94	128.8	195.08	94.35	153.5	117.99	130.32	222.06	153.7	162.43
84247	RTL6	20.34	17.58	14.55	30.1	18.43	35.94	32.03	26.52	21.64	22.82	16.9	31.32	27.56	31.91	24.8	19.09	15.19	21.26	42.91	34.7	11.14	24.88	35.59	22.55	36.1	42.62	39.59	15.57	10.87	35.82	11.94	17.91	23.67	56.83	17.63	17.28	10.99	24.46	36.25	32.73	28.84	39.59	13.08	19.87	24.01	28.97	32.11	13.36
9283	GPR37L1	10.79	14.05	11.9	15.91	10.55	15.05	10.07	8.52	11.65	10.2	19.69	22.44	16.87	9.94	17.07	17.72	21.68	16.4	10.99	7.85	21.37	21.99	20.07	18.07	10.29	23.94	24.9	18.23	16.47	14.97	28.6	13.14	12.11	20.39	18.12	13.75	18.28	15.89	11.54	14.11	22.87	11.35	17.59	12.63	11.97	23.23	20.83	13.7
284273	ZADH2	25.74	22.37	23.8	19.97	21.61	34.52	23.93	33.01	22.27	15.83	25.74	32.87	21.5	17.55	33.27	19.74	28.01	25.48	20.51	19.89	20.95	25.96	30.12	26.86	25.02	20.86	33.58	31.79	25.32	34.95	34.28	23.63	19.28	31.45	20.5	16.45	28.98	24.71	22.47	19.69	30.12	18.51	22.18	11.55	18.46	16.3	25.28	17.38
29927	SEC61A1	114.15	171.7	126.78	215.41	132.48	267.62	88.2	227.69	229.8	358.29	160.27	164.03	117.53	252.61	121.56	210.96	169.7	225.04	93.29	169.6	152.13	128.42	80.51	196.93	101.54	195.84	88.38	193.99	97.92	104.91	131.38	176.81	89.56	230.5	118.71	176.31	109.95	189.03	97.37	128.15	109.02	123.51	103.61	132.16	126.48	208.71	110.33	139.86
8239	USP9X	58.62	56.9	56.68	59.98	55.93	48.29	72.55	67.81	65.09	45.88	45.34	71.23	68.54	38.86	62.46	56.06	65.61	58.88	74.14	67.17	50.79	57.57	73.49	61.96	77.01	67.38	88.36	65.26	47.36	75.28	63.17	67.85	86.07	54.28	69.36	85.55	57.63	34.62	78.63	72.66	65.29	84.25	49.09	34.87	63.69	71	69.8	51.08
139422	MAGEB10	13.49	19.24	10.21	26.37	11.83	19.62	12.18	15.2	17.36	19.31	26.55	30.89	23.54	17.25	30	23.93	34.78	27.88	13.86	12.21	30.9	33.07	27.2	34.59	15.68	40.47	24.03	34.65	28.03	29.74	36.37	17.23	16.92	34	23.03	26.11	28.96	29.02	14.52	21.99	31.43	17.2	21.22	14.63	17.79	37.6	28.09	20.65
164153	UBL4B	0.3	0.34	0.54	0	0	0.33	0	0.28	0.33	1.42	0	0	0	0	0	0	0	0	0	0	0	0	0	0.87	0	0	0.4	0	0	0	0	0.55	0	1.27	0.32	0	0	0	0	0.42	0	0	0	0	0	0	0	0.64
148156	ZNF558	18.43	22.36	16.26	34.25	17.01	23.09	18.56	32.1	21.6	20.43	24.92	32.38	30.4	18.05	26.39	28.76	33.82	28.51	21.88	20.74	40.92	38.3	31.51	33.98	18.98	46.3	32.26	47.31	33.73	30.95	33.19	23.87	20.57	42.57	29.16	22.75	43.15	40.56	18.49	27.2	35.02	22.75	29.93	28.53	18.05	48.16	41.78	25.99
79833	GEMIN6	65.26	97.13	58.73	94.07	56.45	89.78	62.73	66.03	82.56	77.61	102.64	117.96	113.61	61.32	101.42	105.86	153.1	106.94	62.22	64.35	128.56	118.39	108.91	146.48	56.06	161.7	116.9	139.42	99.63	106.29	185.62	75.02	69.83	137.66	102.47	95.03	128.72	113.42	55.62	100.7	134.82	68.87	98.84	62.21	75.56	155.77	145.22	87.3
51806	CALML5	18.69	20.09	41.34	21.7	16.67	6.48	0.52	0	3.46	9	38.78	1.41	0.68	1.45	38.21	384.28	16.97	3.84	0.99	1.54	283.62	249.59	0	1.53	0.53	12.13	0	94.57	25.26	0	0.74	134.15	15.7	28.45	10.28	577.35	12.05	6.45	0.51	5.18	2.87	3.13	35.74	66.92	2.06	0.72	0.74	108.52
84233	TMEM126A	16.29	22.64	15.08	11.77	18.84	23.97	15.59	21.49	16.77	9.76	15.54	15.49	6.66	11.2	11.26	11.79	7.72	15.64	16.29	25.12	25.06	17.97	13.54	6.53	21.16	31.55	23.26	15.36	10.44	24.66	19.78	15.3	14.19	9.14	11.94	6.32	8.75	10.48	18.36	14.61	7.49	20	11.6	32.95	20.44	1.76	16.36	10.87
51201	ZDHHC2	22.23	39.05	29.94	17.61	21.39	14.9	18.43	78.56	43.48	32.24	32.51	39.21	16.13	7.87	25.92	7.66	16.29	25.49	21.6	32.98	9.33	27.91	22.26	23.66	21.3	22.24	25.46	9.3	28.75	25.08	35.05	18.18	23.14	26.15	18.39	2.81	9.31	10.69	25.42	22.08	19.01	32.3	27.64	6.22	32.66	34.24	22.51	35.07
90070	LACRT	0	0	0	0	0	0	0	0	0	0	0	0	0	0	0	0	0	0	0	0	0	0	0	0	0	0	0	0	0	0	0	0	0	0	0	0	0	0	0	0	0	0	0	0	0	0	0	0
84300	UQCC2	15.34	26.84	19.59	14.1	22.9	33.46	12.07	42.79	15.81	25.39	18.56	16.49	12.3	18.67	15.4	22.03	15.77	24.83	11.89	16.15	18.77	20.66	10.07	14.3	17.6	32.41	9.43	15.34	13.5	14.46	15.82	40.73	11.65	26.01	14.49	22.25	13.08	22.82	14.3	15.81	16.75	13.59	10.88	17.43	12.4	17.86	7.43	22.39
107985320	LOC107985320	3.72	3.31	2.16	2.84	2.29	3.31	1.97	2.74	2.71	2.44	4.59	3.51	3.69	3.31	4.37	4.24	3.98	4.26	2.9	4.32	2.48	3.47	3.04	5.6	2.1	3.86	4.26	7.87	4.6	3.37	5.08	2.27	1.19	3.89	2.14	3.42	4.2	4.34	1.37	2.42	7.9	1.37	2.23	0.67	2.22	5.65	5	4.04
163175	LGI4	31.09	3.48	16.56	31.54	9.79	6.28	57.56	5.99	13.18	4.76	9.47	52.91	35.81	3.15	40.4	9.43	8.7	8.89	77.37	33.33	3.03	17.13	56.91	14.64	61.68	2.31	69.02	7.72	17.09	41.95	2.42	1.3	47.58	1.6	18.9	1.69	16.82	3.19	57.93	43.35	32.68	90.3	15.05	2.32	29.51	2.36	39.09	6.63
10576	CCT2	57.6	75.53	57.56	79.99	69.39	112.76	70.92	111.72	122.44	144.75	79.04	60.15	56.36	168.22	50.66	79.02	79.56	68.24	73.17	78.21	79.12	81.66	51.49	49.65	63.56	91.44	64.89	125.88	56.56	67.62	72.62	171.8	75.03	119.12	77.95	107.79	56.22	98.54	83.32	89.89	68.76	83.9	52.48	121.3	54.82	208.01	57.31	117.34
2527	FUT5	0	0	0.52	0	0	0	0.22	0	1.07	0.23	0	0	0	0.25	0.35	0	0.98	0	0	0	0	0	0.93	0	0	0.33	0	0	0	0.3	0.32	0.25	0	0.36	0	0.33	0.41	0	0	0	0	0	0	0.49	0	0	0	0
2653	GCSH	12.59	24.85	18.23	22.61	19.61	13.85	17.87	33.51	34.55	46.21	19.85	20.32	16.48	22.74	15.04	17.98	25.14	20.5	22.14	22.8	18.2	28.84	17.66	10.89	21.73	24.62	11.58	18.65	13.71	26.28	9.4	16.96	20.55	42.57	17.81	16.77	13.02	19.3	14.16	17.05	14.75	24.49	12.8	23.72	15.54	22.28	14.71	25.27
23545	ATP6V0A2	29.88	43.66	28.37	38.01	28.21	38.4	27.31	30.42	40.02	36.91	41.9	55.49	41.42	29.88	41.45	42.05	52.75	52.59	27.61	37.65	54.29	47.64	41.58	58.94	26.51	62.26	45.7	53.4	38.77	50.31	68.16	35.81	34.52	55.49	37.15	41.25	47.83	47.5	27.57	41.64	48.22	29.28	39.23	30.39	33.33	83.25	49.8	38.74
79585	CORO7	24.07	30.3	29.91	32.29	23.63	31.53	20.55	31.64	33.76	19.17	25.93	31.6	27.16	36.93	19.68	41.03	38.65	39.87	20.6	52.26	45.2	27.67	19.45	65.83	22.29	19.81	29.29	21.01	22.34	25.84	73.69	15.17	19.54	28.88	20.6	28.72	23.42	19.49	13.67	25.77	25.8	35.7	17.66	39.52	34.15	23.38	24.9	9.19
57181	SLC39A10	16.85	24.27	17.17	18.72	19.08	25.87	15.9	22.15	28.1	22.18	17.81	22.76	21.56	30.62	15.81	17	34.6	24.77	15.48	29.84	23.42	27.78	17.12	35.03	14.62	35.69	17.8	20.62	15.68	22.79	46.1	22.14	17.68	123.66	18.51	16.63	16.16	26.43	19.04	17.5	21.17	16.83	17.77	19.52	24.03	35.51	20.92	14.47
84811	BUD13	24.29	39.69	22.8	18.36	25.21	28.6	16.49	47.31	21.4	24.48	22.6	17.42	19.43	27.36	22.61	16.89	20.23	16.55	21.15	27.16	25	30.9	17.22	21.82	19.27	20.2	19.57	19.52	20.75	16.13	29.42	14.72	18.85	29.42	16.04	18.63	21.16	9.75	23.78	16.8	22.93	22.32	16.99	14.96	18.39	17.53	17.97	14.93
3485	IGFBP2	162.31	796.97	142.05	578.97	276.74	524.85	392.04	492.3	92.89	68.94	216.61	204.61	255.19	350.45	211.84	124.18	115.48	344.72	258.21	178.5	138.92	56.51	247.73	80.38	271.09	404	251.74	336.94	225.99	218.99	15.66	300.9	301.89	231.18	299.49	34.45	166.53	110.63	224.02	225.32	352.29	298.16	257.88	117.23	132.47	1196.32	254.18	152.3
5940	RBMY1A1	0	0	0	0	0	0	0.32	0.3	0	0	0	0	0	0	0	0	0	0	0	0	0	0	0.85	0.47	0	0	0	0	0	0	0	0	0	0	0	0	0	0	0	0	0	0.32	0	0	0	0	0	0
79789	CLMN	19.29	8.86	17.23	15.32	13.6	10.32	13.09	19.47	25.38	11.41	14.41	18.14	19.47	6.68	28.77	8.64	22.1	10.86	10.16	13.77	11.07	12.53	15.16	25.38	11	4.24	20.75	6.71	15.72	13.27	14.22	3.77	21.36	22.13	22.65	2.98	20.69	4.43	12.36	19.99	28.84	14.98	27.45	7.8	31.37	14.54	12.68	7.15
51350	KRT76	0.38	0.82	0.16	0	0	0	0	0	0	0	0	0	0	0	0	4.31	0	0	0	0	0.22	0	0	0	0	0	0	0	0.38	0	0	0.19	0	0	0.19	0.25	0.25	0.22	0	0	0	0	0	0	0	0	0	1.52
10965	ACOT2	37.36	55.62	30.47	65.47	38.66	38.28	76.51	31.92	33.01	36.71	34.78	67.25	94.4	36.85	46.85	34.74	40.3	55.51	118.61	51.68	25.97	45.56	90	39.61	71.26	50.16	70.99	72.3	29.42	76.28	43.17	37.13	48.62	53.19	43.35	36.94	34.81	30.88	98.16	77.18	48.48	66.55	27.1	37.76	34.98	58.84	66.94	36.16
442425	FOXB2	0	0	0	0	0	0	0	0	0	0.33	0	0	0	0	0	0	0	0	0	0	0	0	0	0	0	0	0	0	0	0	0	0	0	0	0	0	0	0	0	0	0	0	0	0	0	0	0.49	0
10328	EMC8	21.56	41.06	23.06	46.36	19.81	30.87	29.13	48.84	50.19	72.81	43.18	20.01	25.31	53.47	25.16	44.93	45.33	57.73	35.23	42.52	37.58	28.8	27.68	24.19	32.77	47.15	25.77	37.73	24.91	34.83	27.42	28.25	17.13	26.56	31.61	40.99	25.16	67.77	32.25	22.6	37.15	30.18	35.7	28.47	31.35	27.85	33.23	25.42
9987	HNRNPDL	64.42	60.92	57.82	64.56	54.49	70	53.08	75.67	86.53	71.43	69.62	72.69	61.66	80.66	71.39	72.55	80.5	69.52	66.49	76.43	84.61	76.66	65.1	83.9	77.82	99.97	60.93	76.66	62.94	75.83	76.13	57.06	84.9	96.17	80.12	43.59	88.2	85.88	68.58	76.82	96.86	71	67.39	71.6	60.85	63.53	65.2	62.33
4854	NOTCH3	194.48	219.34	182.21	289.77	204.44	249.06	106.82	191.52	315.08	430.52	206.38	176.96	157.82	293.36	173.29	287.13	182.43	168.61	105.02	220.04	265.67	214.21	70.57	213.24	119.52	242.23	116.72	96.1	194.48	92.09	43	101.3	116.93	89.36	158.92	166.81	187.42	458.54	107.3	155.5	153.45	189.23	154.19	233.68	228.26	175.56	89.69	212.25
79094	CHAC1	12.2	2.05	37.47	4.47	22.34	8.01	2.55	13.29	2.27	9.88	16.56	9.15	1.47	2.98	12.61	10.67	4.1	8.71	1.83	6.67	3.3	2.89	1.5	3.3	0.87	2.88	2.04	2.5	36.05	1.89	3.45	4.52	9.46	2.94	11.63	4.57	5.49	1.19	0.49	1.22	2.81	2.63	16.51	2.8	4.05	6.25	0.96	10.53
503834	DPRX	2.21	2.52	2.65	6.64	2.55	6.49	2.13	4.04	4.77	6.2	7.18	5.83	5.64	1.99	8.17	6.99	6.1	6.18	2.72	4.25	9.9	3.04	2.83	2.11	3.63	1.04	2.92	10.23	6.96	4.97	9.18	7.39	4.81	4.13	6.29	4.08	4.15	2.66	0.7	6.11	3.95	2.87	2.9	0	1.42	10.95	3.06	2.35
129521	NMS	0	0	0	0	0	0	0	4.63	0	0	0	0	0	0	0	0	0	0	0	0	0	0	0	0	0	0	0	0	0	0	0	0	0	0	0	0	0	0	0	0	0	0	0	0	0	0	0	0
553158	PRR5-ARHGAP8	5.01	3.71	2.78	0	0	0	0.8	0	6.87	0	10.92	4.68	2.29	0	3.74	4.37	8.35	4.04	0	0	15.73	4.94	0	0	0	20.3	0	5.98	9.39	0	0.97	12.62	1.36	14.67	3.67	7.77	9.55	14.09	0	0	4.16	0.71	10.52	5.2	6.42	11.46	0	14.33
4773	NFATC2	35.3	23.69	29.43	19.99	17.7	13.41	36.6	15.67	28.89	13.04	20.68	29.97	71.67	9.05	25.36	13.17	50.12	33.65	51.87	39.49	28.81	34.84	68.77	182.92	31.91	18.99	35.27	12.21	14.18	14.71	88.1	12.05	52.07	6.87	25.27	18	23.07	10.8	24.41	59.45	86.31	54.98	17.27	8.71	27.69	6.83	36.55	11.44
1112	FOXN3	69.01	71.43	59.93	59.34	53.5	51.92	117.5	296.99	65.02	55.36	51.3	89.14	82.24	26.42	78.05	44.66	53.53	46.99	118.99	89.41	42.52	71.98	94.87	71.31	118.9	36.83	112.01	31.52	45.83	110.78	60.97	32.59	105.83	39.92	53.65	29.7	47.05	23.54	104.57	90.66	81.4	102.31	39.43	33.15	62.64	28.36	95.37	47.58
57506	MAVS	74.57	97.96	66.64	74.71	68.04	73.79	65.75	103.14	84.23	81.92	77.55	101.39	82.03	67.87	96.12	84.05	97.16	81.84	71.83	74.55	86.65	87.91	91.22	86.01	66.29	123.03	105.83	93.18	85.26	94.07	106.51	82.54	64.2	127.77	65.96	80.07	94.06	113.96	64.32	83.53	106.02	71.19	76.7	57.06	63.95	113.02	122.82	74.26
8844	KSR1	73.63	79.17	79.71	79.3	65.96	44.74	34.69	62.13	74.43	59.39	88.69	47.5	52.89	52.5	75.29	44.7	56.38	50.17	34.16	55.4	90.01	58.92	36.98	80.27	31.93	66.5	41.96	36.76	74.76	32.35	62.99	62.61	29.93	19.49	84.75	47.05	105.6	60.07	32.53	53.07	78.5	35.26	75.47	44.79	52.04	90.69	45.47	69.34
81551	STMN4	0.2	0.93	0.74	1.39	0.87	0.28	0.59	1.12	0.88	0.19	0	1.36	0.52	0.18	0.74	0.49	0.85	1.05	1.41	0.59	0.5	1.19	2.38	0.65	1.87	0.87	2.25	1.81	0.86	1.23	1.2	0.19	0.27	0.57	0.66	0	0.58	0.25	1.17	1.13	1.37	0.61	0	0.43	0.59	0.96	2.37	0.97
55016	MARCHF1	9.16	12.43	11.16	5.91	7.93	13.69	4.77	10.07	16.03	6.69	10.04	15.24	7.2	11.01	9.5	8.78	12.32	11.79	4.56	28.01	17.13	18.21	4.49	25.27	9.47	9.2	4.66	7.92	7.18	6.2	41.08	6.19	6.07	13.36	8.09	4.87	5.69	9.72	4.95	4.43	5.48	11.3	8.33	5.24	12.38	9.73	6.87	5.39
26267	FBXO10	10.28	9.86	10.89	10.39	8.51	8.05	10.99	4.5	9.15	8.02	9.4	13.83	13.04	7.68	10.98	7.42	13.89	11.06	12.57	13.73	11.24	13.16	16.11	21.36	10.71	7.12	14.28	7.92	11.85	12.62	19.92	7.6	8.99	9.4	5.3	4.46	11.71	4.73	11.33	13.68	14.38	13.89	10.27	5.16	13.57	12.65	15.87	6.53
2193	FARSA	39.25	77.82	50.87	79.04	55.09	65.67	40.11	103.27	82.98	106.77	72.37	46.56	32.89	119.13	39.48	54.93	57.7	85.21	45.83	81.43	75.27	45.85	39.47	32.92	42.19	97.6	37.68	135.05	52.04	39.54	55.46	115.8	32.67	59.95	50.52	103.28	39.13	96.57	50.11	46.06	46.97	46.16	44.54	100.38	29.94	96.76	39.91	84.6
79844	ZDHHC11	37.8	57.48	15.27	27.7	27.96	13.58	20.86	24	29.92	45.83	78.1	37.43	24.98	20.97	24.36	8.02	64.68	42.7	20.64	11.02	57.82	31.61	37.03	45.13	16.1	47.05	55.75	37.31	29.37	25.14	15.2	33.42	22.91	15.16	88.72	5.03	66.64	18.01	17.5	17.64	102.08	23.15	51.72	4.99	14.55	17.07	58.03	87.53
100529063	BCL2L2-PABPN1	25.46	36.37	32.11	42.99	49.74	22.99	57.13	50.21	26.03	31.29	24.4	21.72	33.84	34.57	36.99	26.65	18.91	42.05	65.83	49.03	51.66	29.28	43.24	34.96	64.17	41.23	58.84	30.16	31.62	35.78	24.3	43.38	47.64	17.66	52.92	83.18	36.94	30.5	40.45	76.31	52.51	57.25	48.2	40.65	50.67	25.49	46.98	38.68
4312	MMP1	0.25	9.65	0	1356.32	2.78	609.88	0	45.59	24.75	50.44	4.32	12.72	1.27	404.17	0.31	688.38	4.13	236	0.46	29.15	0.91	40.77	0.32	2.3	1.13	607.81	1.21	100.32	0.26	3.72	0.35	29.73	0.5	10.93	0.8	233.84	2.26	237.36	0	5.72	0.67	3.13	1.22	473.25	0	8.99	1.73	80.97
79600	TCTN1	449.01	564.73	341.75	461.61	327.14	530.74	290.83	326.71	552.23	467.8	473.31	615.08	548.96	458.3	581.13	502.85	766.53	539.25	266.13	363.81	632.74	855.9	572.34	655.61	349.22	713.98	589.13	673.98	431.72	657.13	687.35	504.09	460.08	876.11	429.65	380.67	612.75	716.74	274.97	458.72	626.9	348.1	413.55	281.01	307.43	706.05	643.32	463.8
10388	SYCP2	4.85	4.21	4.17	6.69	4.32	6.48	2.74	14.31	5.98	3.36	6.45	4.76	7.79	9.82	6.55	5.56	8.39	8.6	4.35	4.68	7.67	8.07	8.78	8.88	3.44	6.03	5.89	23.73	5.32	6.33	8.67	10.52	7.63	13.41	5.1	4.75	7.8	10.11	3.38	6.74	8.94	5.68	9.98	1.57	4.63	87.18	6.13	11.82
79004	CUEDC2	38.14	42.53	29.81	36.44	29.09	52.27	63.6	62.57	40.33	38.47	30.9	38.2	41.76	31.02	42.92	27.88	28.96	27.16	64.02	48.87	22.06	34.1	54.34	31.8	61.63	33.32	52.09	20.68	27.76	69.69	36.03	31.78	32.41	68.77	44.81	33.7	33.09	31.87	79.2	43.55	51.75	61.83	23.51	33.83	45.75	35.73	54.68	24.98
2980	GUCA2A	0	0	0	0	0	0	0	0	0	0	0	0	0	0	0	0	0	0	0	0	0	0	1.03	0	0	0	0	0	0	0	0	0	0	0	0	0	0	0	0	0	0	0	0	0	0	0	0	0
1176	AP3S1	72.28	63.85	76.09	82.12	70.82	73.87	79.85	54.62	60.98	55.14	53.76	69.45	68.12	108.39	78.52	57.78	69.54	59.28	57.83	66.08	65.68	64.61	63.47	71.37	73.06	41.25	62.75	81.44	67.18	81.58	38.6	64.98	75.23	60.4	68.02	52.83	54.74	43.09	63.72	52.57	48.81	59.69	75.25	127	53.12	49.3	54.22	72.83
8269	TMEM187	10.24	14.89	8.77	6.15	5.62	8.84	9.52	9.73	9.17	12.64	9.59	8.45	8.43	6.8	11.99	5.08	7.86	5.83	10.6	7.13	9.22	10.67	7.7	7.64	12.44	17.31	9.37	10.23	7.47	6.39	6.71	4.54	5.29	7.65	3.44	8.66	4.18	11.93	7.98	6.39	8.31	7.87	9.48	5.67	10.52	8.92	9.08	7.86
54974	THG1L	24.2	33.15	26.28	30.07	26.53	32.36	24.48	19.39	30.62	28.36	36.98	40.69	29.97	25.23	31.71	32.39	36.74	30.53	25.54	24.57	32.93	38.57	36.91	48.26	23.93	37.42	32.33	36.78	33.25	38.92	51.04	28.69	24.73	42.98	34.61	29.36	43.45	34.44	21.58	31.04	36.09	28.89	25.92	20.41	24.45	43.41	33.8	26.87
84948	TIGD5	16.75	30.56	13.42	16.42	15.01	23.6	12.82	51.69	24.62	27.88	25.61	16.35	12.89	17.96	14.07	16.01	23.03	23.22	19.42	18.01	26.41	27.05	16.23	16.21	11.62	26.49	18.79	29.88	16.47	18.08	19.65	28.91	12.29	25.21	22.12	19.8	17.15	27.45	12.35	13.14	20.08	15.28	16.92	16.07	11.05	56.53	18.95	17.5
283446	MYO1H	8.76	10.43	8.39	12.6	7.72	10.48	6.76	7.89	8.39	7.61	12.02	17.78	12.12	6.16	14.91	11.48	12.02	12.08	6.44	7.4	16.17	13.57	12.31	15.51	6.26	14.52	16.47	13.94	12.15	12.79	16.83	6.36	10.42	11.11	10.39	9.98	13.26	13.9	7.35	10.63	18.57	9.26	9.43	4.54	7.47	13.91	19.28	9.58
401137	PRR27	3.1	3.03	1.98	3.82	2.21	4.46	2.14	3.33	4.41	3.54	4.48	5.73	4.81	2.03	5.31	4.94	6.27	3.71	2.77	3.08	5.26	6.63	5.08	6.14	2.67	7.63	6.4	2.89	3.7	6.52	5.95	3.76	2.61	7.48	5.57	4.42	6.02	5.23	2.43	4.39	29.55	2.7	5.23	1.93	4.62	7.92	4.22	4.06
2734	GLG1	70.59	76.27	63.74	89.45	56.17	71.02	85.31	78.25	85.13	81.57	62.89	94.12	87.87	78.81	81.4	83.41	82.1	99.33	79.75	89.34	69.07	87.65	91.99	98.62	89.19	79.12	94.51	80.41	56.63	82.55	90.97	32.52	73.65	79.48	59.03	70.46	54.03	88.52	82.94	74	80.88	85.46	52.5	50.6	80.15	68.63	91.67	51.61
51372	TMA7	104.09	86.36	106.12	77.72	135.09	74.07	77.33	89.83	65.11	64.46	120.32	82.96	65.94	75.32	98.73	56.2	93.93	90.86	52.57	100.32	66.34	96.1	77.31	87.44	83.2	59.85	85.32	95.78	113.97	102.35	84.69	91.96	82.45	76.01	68.99	50.09	118.88	57.12	50.09	53.63	86.59	52.11	88.07	43.86	82.28	110.61	81.26	60.42
55847	CISD1	9.28	6.91	9.55	10.26	6.08	9.61	15.56	12.49	7.78	8.51	4.72	10.76	9.92	8.03	9.81	9.45	9.68	6.59	18.41	16.24	2.78	10.45	12.4	3.8	14.58	7.8	11.52	6.47	4.18	18.18	3.68	15.74	12.79	6.64	6.88	6.3	7.48	4.57	18.08	11.28	11.44	18.5	6.15	9.25	7.32	4.87	15.51	9.47
79796	ALG9	25.72	32.23	21.93	26.03	18.13	29.06	21.7	26.65	26.23	20.98	29.42	36.57	30.26	19.27	30.94	30.59	40.35	30.14	23.21	21.72	31.4	37.35	34.22	40.43	24.69	40.4	35.77	30.98	32.91	37.72	35.44	21.68	24.42	35.04	26.87	24.43	32.31	26.87	25.25	30.77	36.78	25.56	23.8	19	25.15	32.31	33	25.21
85289	KRTAP4-5	0	0	0	0	0	0	0	0	0	0	0	0	0	0	0	0	0.71	0	0	0	0	0	0	0	0	0	0	0	0	0	0	0	0	0	0	0	0	0	0	0	0.69	0	0	0	0	0	0	0.55
55311	ZNF444	36.31	35.31	36.25	33.99	32.11	33.4	39.8	28.01	31.75	22.69	37.74	45.13	39.49	42.82	36.81	35.83	44.37	35.35	68.15	45.53	32.82	29.49	57.87	34.31	62.04	47.24	56.22	37.75	31.51	55.45	46.11	32.45	33.41	55.58	24.82	29.84	37.6	39.67	50.14	47.35	61.48	40.57	42.21	20.7	35.88	47.73	58.64	27.21
79862	ZNF669	91.95	130.11	73.23	151.92	74.21	135.86	73.88	90.5	157.39	137.95	133.52	124.8	121.25	104.96	138.7	137.01	162.93	167.18	87.65	96.71	190.03	163.32	148	208.34	73.9	255.11	134.96	187.5	138.87	157.75	216.5	148.77	94.44	210.9	159.17	159.42	169.54	206.63	77.99	155.27	207.8	83.6	158.3	112.91	110.34	192.8	149.56	140.52
440574	MICOS10	43.12	47.29	36.57	49.74	33.98	49.57	42.7	36.21	43.53	38.89	45.53	60.99	51.71	30.79	48.1	49.35	57.88	46.29	55.81	37.98	52.41	62.9	59.69	58.77	45.65	69.02	67.6	53.4	51.14	65.28	75.49	44.4	48.57	50.36	54.18	45.45	56.01	59.03	41.29	55.9	66.12	51.23	53.04	34.41	38.56	62.07	58.52	41.46
1591	CYP24A1	2.18	6.8	0.44	5.22	2.01	4.55	0.16	6.79	11.18	0.57	8.93	1.92	0.21	5.29	0.56	2.28	19.72	36.63	0.15	2.52	52.49	4.51	0.42	22.69	0.65	40.87	0	15.71	3.9	0.39	0.23	0	5.32	25.43	35.28	21.09	4.4	3.44	0	1.36	22.57	5.59	0.48	26.61	1.05	0.44	0	75.72
57224	NHSL1	31.85	28.21	38.54	35.32	38.41	38.65	11.28	83.07	28.66	36.42	38.79	28.74	13.77	26.12	37.98	45.42	39.13	25.92	13.02	17.23	57.78	46.58	12.84	24.63	13.24	39.23	16.32	31.88	49.29	14.07	6.52	49.57	20.29	39.71	37.01	45.29	61.03	62.68	8.55	16.81	24.59	11.21	31.41	20.8	14.47	62.63	18.44	41.63
5869	RAB5B	162.72	116.88	161.79	117.73	151.2	122.27	167.22	125.15	105.99	95.73	129.76	142.68	127.58	128.24	137.46	89.82	117.62	90.46	208.49	143.77	88.62	128.96	155.64	71.42	199.26	66.31	176.95	86.92	141.89	157.76	81.21	108.83	172.44	106.43	118.34	68.81	133.34	67.41	185.28	134.44	102.37	174.84	148.03	86.41	96.7	104.45	155.27	94.27
59307	SIGIRR	28.99	43.22	34.53	19.44	27.67	28.76	29.71	27.54	39.98	26.09	35.96	29.61	28.24	18.69	23.92	18.73	25.86	30.33	30.77	37.64	25.4	25.29	21.48	38.48	29.01	26.51	22.9	29.2	23.68	21.6	77.96	28.26	14.95	14.19	29.22	10.48	30.35	12.79	24.86	35.28	36.06	28.11	50.84	17.95	36.5	22.95	18.45	27.68
165055	CCDC138	7.91	12.28	7.37	9.2	6.59	9.97	5.73	13.86	12.95	13.63	12.48	10.39	8.07	7.42	9.71	9.29	17.36	9.45	4.28	7.2	13.76	11.86	7.03	11.1	6.64	14.39	7.15	14.27	10.19	7.97	25.11	15.89	7.33	30.8	11.87	7.82	9.82	12.09	4.68	5.91	11.01	4.43	11.37	4.57	6.15	17.94	10.23	11.98
26157	GIMAP2	4.74	8.65	8.82	2.14	4.66	7.67	3.66	7.24	9.57	2.96	5.82	10.44	6.86	11.69	5.46	5.25	7.42	10.24	5.56	21.92	6.96	12.64	3.25	9.5	9.04	4.93	7.1	5.6	4.32	7.26	34.17	8.37	5.51	7.98	4.39	2.63	3.12	2.29	3.62	1.75	2.12	7.41	4.98	6.04	9.46	2.14	2.63	4.04
126767	AADACL3	0	0	0	0	0.29	0.24	0	0	0	0.1	0	0.15	0.14	0	0	0	0.15	0	0	0	0	0.15	0	0.16	0	0	0	0	0	0	0.3	0	0.12	0	0	0	0	0.13	0.1	0.15	0	0	0	9.58	0	0.15	0	0.35
90007	MIDN	158.4	164.76	166.42	140.01	173.22	120.1	452.86	157.01	137.42	145.22	132.55	223.82	357.69	244.02	157.8	141.12	194.68	134.59	161.54	185.39	156.69	107.36	245.92	223.47	212.25	162.78	177.66	253.86	105.28	117.32	119.67	106.27	342.69	121.16	265.87	110.84	248.93	183.96	224.77	301.63	284.07	296.59	179.12	128.3	215.1	88.18	211.72	282.61
722	C4BPA	0.21	0	0.18	0.23	0.36	0	0.79	0	0.22	0	0	0.52	0.26	0.19	0.25	0	0	1.23	0	0.2	0.25	0	0.26	0.29	0.2	0	0.27	0	0.4	0.56	0	0	0.45	0	0.22	0.28	0	0	0	0.85	1.1	0.56	1.82	0	0.6	0	0.29	0.22
344167	FOXI3	17.61	24.89	16.3	44.39	13.4	21.49	12.57	20.26	21.3	21.2	26.17	27.07	28.29	16.63	20.41	26.82	32.85	26.6	21.79	20.9	33.62	30.07	37.48	39.16	13.56	53.01	32.42	34.22	23.64	32.29	39.52	20.5	18.19	41.79	21.17	23.89	34.51	38.07	14.12	30.08	38.72	16.16	28.22	15.95	18.01	35.6	37.86	26.88
10083	USH1C	0.79	0	0.25	0.08	0.46	0.46	0.33	0	0	0	0	0	0	13.11	0.7	0.34	1.17	0	0.38	0.2	0	0	0.18	1.62	0.14	0	0.18	0	0.07	0	0	3.41	0	0.29	0	0.1	0.4	0	0.27	0	0	0	25.59	0	0	4.83	0	0
782	CACNB1	18.49	24.21	16.26	32.99	14.67	22.93	16.63	21.65	22.17	18.56	17.2	28.77	29.47	19.3	75.96	30.84	32.45	25.81	16.44	22.89	30.52	26.99	26.86	38.98	20.09	33.6	31.18	25.11	19.77	30.73	35.06	20.12	20.83	36.28	20.33	23.43	25.92	20.3	16.83	23.36	27.7	15.73	23.39	16.11	16.44	39.22	35.81	19.58
54477	PLEKHA5	75.53	77.54	59.56	90.08	68.08	63.72	79.14	68.15	69.34	68.44	91.37	120.56	105.52	70.12	113.72	95.87	88.12	75.24	99.49	69.06	76.96	114.41	127.06	100.01	106.49	113.55	142.45	84.66	95.58	162.53	80.84	79.9	112.68	188.18	87.09	70.51	131.11	94.15	93.73	100.86	140.79	95.52	82.75	42.46	58.19	99.48	130.19	73.42
80135	RPF1	13.68	15.34	13.78	12.57	19.12	30.21	15.92	31.87	17.56	16.51	18.36	18.39	11.56	31.4	14.6	15.7	25.97	17.82	14.82	25.71	17.32	16.63	13.7	11.29	21.29	14.16	15.33	31.99	14.63	14.42	19.3	20.56	18.95	8.46	10.66	14.79	12.1	10.64	14.17	12.21	18.37	15.86	11.87	16.75	10.53	21.66	13.52	20.73
55072	RNF31	41.78	91.29	34.22	42.29	37.35	48.94	31.5	56.55	60.7	59.54	42.26	45.44	34.93	51.36	42.34	44.79	47.54	54.96	38.27	53.68	52.15	45.05	35.54	41.86	49.22	76.32	29.52	68.99	29.64	37.28	63.14	64.4	28.08	71.02	37.37	69.96	46.91	45.58	35.07	38.78	48.49	36.19	41.35	47.93	38.03	62.67	39.73	75.34
7483	WNT9A	9.79	50.82	4.44	15.68	10.29	11.88	19.83	14.28	15.82	21.71	11.74	38.52	84.47	25.23	18.73	9.43	14	13.35	56.25	23.71	20.04	24.54	48.4	19.88	29.47	16.44	20.16	28.12	7.8	37.62	0.95	13.83	22.42	3.8	40.09	10.98	22.58	34.18	98.36	77.97	27.74	45.81	6.98	10.1	5.26	5.99	41.25	17.06
267002	PGBD2	5.7	10.9	5.6	5.02	7.3	4.26	2.11	10.38	4.9	4.08	8.37	6.65	5.11	4.21	4.97	3.69	5.33	8.53	5.14	5.57	5.71	5.09	3.18	5.76	3.84	7.88	5	15.49	5.57	3.9	9.77	11.04	4.93	6.35	7.36	3.08	5.91	7.78	3.41	5.23	6.61	3.47	7.21	4.25	7.64	5.11	3.77	8.27
57862	ZNF410	28.17	33.05	29.51	33.55	31.32	33.32	36.03	22.24	35.85	36.77	29.64	35.88	37.75	37.9	27.93	32.35	37.71	34.72	30.92	34.58	35.91	32.16	38.3	37.48	34.66	47.48	32.77	46.98	29.16	34.78	36.35	45.72	44.4	41.41	37.07	41.35	37.07	47.64	34.68	38.06	30.93	43.61	27.61	46.9	29.33	56.49	37.12	36.76
22849	CPEB3	28.08	23.19	26.63	17.37	24.27	15.02	22.2	17.24	17.38	10.5	34.26	20.53	29.58	8.65	36.36	13.04	29.95	26.37	28.84	17.79	32.08	26.77	50.73	31.33	38.12	12.63	33.15	24.83	40.22	42.05	21.63	33.33	32.41	11.38	29.3	11.52	48.77	16.27	24.8	25.04	39.27	17.23	38.09	14.14	21.62	22.41	29.98	17.86
100528032	KLRC4-KLRK1	0	0	2.84	0	3.09	0	1.46	1.07	0	0	1.52	0	0	2.39	0	0	2.24	0	2.49	6.57	1.45	0	0	0	2.34	2.19	0	3.35	0	1.2	1.32	0	5.68	1.87	2.02	6.6	0	0	2.27	0	3.19	2	0.28	3.94	0	3.28	0	0
84432	PROK1	0	0	0	0	0.28	0	0	0	0	0	0.36	0	1.26	0	0	0	0.45	0	0	0.63	0	0.45	0.42	0	0.65	0	0	0	0	0	0	0	0	0	0	0	0.46	0	0.63	0	0	0	0.32	0	0	0	0	0.35
55262	MAP11	18.44	37.06	26.6	31.74	20.59	30.85	12.1	46.37	35.16	33.42	28.7	23.07	16.84	18.56	24.94	22.96	55.87	49.81	16.11	31.17	52.14	31.19	13.31	29.55	14.52	85.11	10.46	46.03	23.1	13.54	48.1	35.58	15.3	20.95	20.86	18.03	33.44	77.2	13.2	23.73	38.9	15.02	39.62	22.03	18.34	33.88	19.73	34.35
23258	DENND5A	43.15	31.35	35.55	76.99	30	54.64	84.97	33.96	40.32	26.01	21.09	77.12	92.57	28.32	50.7	39.91	32.37	46.85	87	78.5	19.48	42.78	90.51	76.68	92.74	72	103.77	39.13	23.56	93.94	53.63	55.29	68.34	69.57	50.09	20.64	47.63	36.26	108.79	96.99	65.72	104.36	24.65	38.06	60.91	30.97	77.45	28.97
57571	CARNS1	8.97	10.06	8.77	7.61	7.46	7.88	8.69	6.53	10.97	6.67	12.66	10.14	11.21	6.41	17.13	7.79	14.18	12.62	6.93	6.55	14.32	11.74	12.86	17.49	5.7	10.1	14.19	8.75	10.18	9.54	22.04	5.94	7.55	19.3	9.12	9.27	14.92	11.3	4.6	7.6	18.48	6.09	25.39	3.22	8.73	9.57	13.38	6.97
64779	MTHFSD	14.89	23.87	15.2	19.24	17.62	10.71	14.99	20.44	32.83	31.63	16.64	15.06	13.99	38.29	18	19.21	25.19	24.62	23.45	20.34	25.3	25.83	19.37	20.49	19.55	31.66	21.78	16.29	22.47	19.59	22.02	18.04	13.56	27.12	16.71	16.71	23.07	32.11	16.64	16.18	19.96	14.11	16.64	14.3	20.83	19.96	23.4	17.11
140258	KRTAP13-1	0	0	0	0	0	0	0	0	0	0.56	0	0	0	0	0	0	0	0	0	0	0	0	0	0	0	0	0	0	0	0	0	0	0	0	0	0	0	0	0	0	0	0	0	0	0	0	0	0
10307	APBB3	23.82	18.81	17.91	25.56	16.7	24.75	21.06	9.84	21.04	13.08	20.41	24.98	45.68	9.67	24.54	20.6	24.56	18.05	22.92	18.15	30.82	23.24	32.05	35.43	24.34	21.63	21.17	23.29	16.02	30.6	27.49	11.54	18.2	18.99	27.5	15.64	30.21	13.02	20.93	22.86	45.32	19.02	32.9	22.92	33.78	30.5	38.86	20.49
353149	TBC1D26	0	0.28	0	0	0	0	0.7	0	1.83	2.04	0.26	0	0.62	0	0.3	0	1.3	1.74	0	0.49	1.69	0.33	0	0.35	0	0	0.43	0	0.25	0.33	2.35	0.66	0	0.54	0.52	0	0	0.29	0.69	0	1.21	0.24	0.95	0	0.7	0.33	0.35	0
79075	DSCC1	2.9	7.01	2.03	2.9	4.62	11.76	1.83	15.96	6.87	15.65	4.67	4.6	1.83	9.72	1.59	1.27	5.33	5.9	2.09	5.99	4.77	5.37	3.42	3.07	2.63	3.78	2.98	17.63	2.37	4.16	3.69	14.79	2.23	11.79	3.94	5.97	0.58	10.64	2.54	2.56	3.16	2.4	2.11	2.73	3.17	15.53	2.85	5.89
8831	SYNGAP1	21.13	15.83	17.9	37.56	15.15	27.06	20.41	13.46	21.22	22.53	17.84	22.68	24.08	17.44	18.31	27.11	22.63	27.29	20.08	20.56	22.07	18.88	30.56	36.77	24.32	30.86	24.14	17.8	17.94	18.76	22.92	20.99	20.05	56.57	18.23	12.28	23.33	22.73	20.01	23.62	35.95	14.39	15.69	19.61	15.97	24.14	37.76	23.04
220388	CCDC89	0.38	1.09	0.86	1.3	0.5	0.42	1.3	0.53	0.62	0.36	0.83	1.52	0.98	1.21	0.95	1.37	0.53	0.92	1.06	2.4	0.47	0.53	1.23	1.65	1.13	3.26	1.01	0.24	0.81	1.3	0.53	0.18	1.04	1.61	0.2	0	0.81	0	0.73	0.27	0.26	1.31	2.07	0.41	1.3	0	2.13	0.61
57091	CASS4	15.66	19.98	20.29	16.94	17.85	21.09	14.74	23.35	22.88	16.32	20.31	24.62	22.15	15.02	21.33	16.65	27.83	23.79	12.88	22.22	19.47	31.57	18.64	22	12.87	23.78	19.88	31.5	21.81	22	34.26	19.87	14.73	25.08	19.39	17.23	13.47	14.86	13.65	15.43	21.58	19.78	19.33	21.46	23.41	23.88	21.71	17.68
8637	EIF4EBP3	25.66	19.97	9.46	6.5	12.45	9.1	11.52	22.56	10.5	3.6	17.62	27.88	14.12	2.66	29.3	15.19	12.07	13.48	18.89	13.4	9.86	18.63	5.33	11.57	7.87	11.57	15.33	22.06	19.26	13.6	23.29	8.72	9.64	20.41	20.44	6.75	2.99	0	10.38	2.15	24.07	11.43	9.69	0	17.05	6.19	18.51	12.65
389197	C4orf50	0.13	0.57	0.19	0.45	0.36	0.23	0.29	0.13	0.45	0.38	0.23	0.74	0.13	0.25	0.17	0.17	0.69	0.62	0.23	0.5	0.15	0.21	0	0.5	0.25	0.17	0.43	0.4	0.15	0.13	1.86	0.55	0.11	0.05	0.07	0.09	0	0.04	0.19	0.28	0.13	0.15	0.4	0	0.12	0.19	0	0.22
136991	ASZ1	0	0	0	0	0	0	0	0	0	0	0	0	0	0	0	0	0	0	0	0	0	0	0	0	0	0	0	0	0	0	0	0	0	0	0	0	0	0	0	0	0	0	0	0	0	0	0	0
140883	ZNF280B	1.11	1.06	1.61	1.6	0.58	0.98	2.28	0.99	1.89	0.88	0.88	2.36	2.16	3.84	1.85	0.97	1.92	1.04	2.01	1.72	1.39	1.29	2.75	0.96	3.73	0.63	2.33	0.43	0.27	1.81	4.82	1.06	1.7	0.81	0.99	0.22	1.23	0.58	2.55	1.97	1.79	1.74	1.1	0.39	2.37	6.87	1.86	0.27
64763	ZNF574	19.94	27.86	19.03	18.11	19.9	18.2	15.66	18.13	20.42	22.33	21.13	22.78	12.64	33.42	15.17	14.07	22.17	21.59	26.1	24.27	15.82	14.72	17.9	13.74	22.5	11.92	19.63	32.25	16.08	18.85	17.67	32.62	16.49	26.28	16.67	33.05	9.31	16.83	17.46	19.11	16.3	17.43	17.27	14.01	12.6	31.45	16.02	14.36
159296	NKX2-3	1.77	0.99	1.17	0	0.51	0	0.63	2.05	0.64	0.55	0.64	0	0.28	0.19	1.46	0.26	0.9	1.04	0	0	0	0	0	0	0.21	0.31	0.29	0	0.23	0	0	0.2	0.71	0.61	0.46	0.6	0.3	0.26	0.41	0.3	0	0.42	2.41	0	0	0	0	0.69
147686	ZNF418	9.95	7.82	8.4	13.31	6.35	5.97	13.36	5.84	6.38	7.41	10.37	14.76	14.23	5.54	14.81	9.82	15.33	9.98	22.26	12.32	10.26	13.44	22.18	13.41	14.08	9.83	24.66	8.59	9.71	23.83	14.29	5.68	17.1	7.78	9.31	5.93	13.97	8.39	16.2	13.36	28.95	13.93	8.24	4.05	9.18	9.18	16.39	6.68
26	AOC1	0.19	0.83	3.52	1.26	8.98	3.5	0.18	1.71	6.05	1.92	4.45	1.48	0.95	7.4	0.46	2.88	5.93	4.92	1.38	5.21	1.6	1.54	0.72	0.26	0.32	0	0.74	4.48	1.27	0.76	5.43	0.17	0.2	1.31	0.2	3.36	5.78	4.28	1.25	0.52	0.92	0.71	15.7	2.77	0.9	0.5	0.52	3.97
4108	MAGEA9	0	0	0	0.27	0	0.29	0	0.48	0	0.48	0	0	0.33	0.23	0.32	0.93	11.57	28.52	0	0	0	0	0	0	0	1.85	0	0.33	0	0	0.36	0	0	53.7	0	0.36	0	0.32	0	0	0	0.25	0	0	0	0	0	0
100310812	SPDYE2B	117.67	195.35	101.45	147.74	87.52	150.75	67.29	123.09	169.03	179.34	167.03	182.56	114.33	77.49	169.77	188.46	327.54	254.2	51.39	70.88	209.69	197.18	131.85	165.58	63.46	200.65	171.35	250.8	154.97	149.01	225.09	115.29	87.77	190.58	124.09	164.96	194.49	371.62	67.25	120.85	153.01	62.51	140.23	84.11	83.19	276.47	155.27	112.45
10577	NPC2	148.93	227.97	172.68	113.96	142.07	206.05	136.19	163.07	245.53	186.67	134.9	160.98	182.97	267.26	155.07	143.08	136.42	260.23	102.83	332.65	85.45	216.37	63.76	217.36	158.85	96.42	160.84	147.75	107.38	152.75	182	160.06	113.13	128.87	97.63	208.83	73.21	112.33	110.17	100.42	84.34	212.46	102.84	172.13	213.34	159.07	81.05	87.43
55008	HERC6	45.37	57.12	27.06	7.29	23	19.24	9.9	16.4	12.78	11.51	33.84	13.62	16.19	63.16	17.31	11.13	18.05	28.67	6.75	15.87	36.02	9.87	6.02	9.37	140.95	35.8	8.31	46.69	29.5	14.36	16.4	38.22	20.1	17.75	62.41	38.92	23.83	7.15	7.3	5.43	8.16	16.51	28.35	23.35	14.28	38.61	7.46	54.47
645073	GAGE12G	0	1.7	0	0	0	0	1.09	0	0	0	0	0	2.65	0	0	0	45.68	0	0	0	0	0	0	0	0	0	0	0	0	0	0	97.87	0	0.45	0	0	0	0	0	0	0	0	0	0	0	0	0	0
53630	BCO1	1.28	2.17	0	1.67	0.32	0.28	0.36	1.35	1	0.24	0.32	0.34	0.75	0.7	0	0	2.13	0.71	0.48	0.25	1.89	0.51	0.66	0	0.29	0	1.02	1.12	1.24	0.5	0.51	0.81	0.64	1.49	0	0.36	0.42	0	0.35	0.77	1.03	1.25	4.3	0.55	0.89	0.35	0	1.64
2675	GFRA2	3.03	2.36	3.29	2.52	1.93	4.33	7.8	1.39	4.82	1.36	2.32	7.18	10.59	0.8	7.78	2.76	3.48	2.68	6.46	7.39	0.65	3	8.7	5.49	13.55	1.18	10.37	1.35	0.94	3.74	3.09	0.18	6.21	0.15	2.1	0.37	2.54	0.47	9.59	5.43	4.67	14.36	2.29	2.06	6.54	0.28	4.74	1.1
7913	DEK	56.3	61.56	45.32	79.53	54.72	108.03	69.3	127.96	87.6	109.73	56.08	65.57	55.66	73.82	56.85	79.62	74.92	82.51	83.77	95.47	92.11	79.89	60.72	51.67	87.19	82.93	58.49	77.35	51.57	71.77	83.03	148.78	87.41	177.17	53.59	73.94	41.51	95.92	71.41	67.08	63.04	77.82	45.03	111.53	57.24	65.96	63.46	71.87
728276	CLEC19A	13.27	21.79	17.93	14.53	16	21.73	11.05	13.49	19.36	18.39	24.56	28.88	22.79	13.29	21.59	21.93	27.38	20.09	11.32	14.23	23.6	27.34	22.68	28.35	8.95	29.32	23.67	27.88	25.68	21.92	37.37	11.61	12.18	32.57	15.09	22.73	31.01	21.79	8.2	17.45	26.61	13.86	12.5	14.18	11.26	32.91	19.55	13.72
57579	FAM135A	38.86	20.88	36.36	13.46	53.22	17.51	11.88	17.89	19.49	24.14	45.12	21.2	16.37	14.74	30.64	13.09	22.38	20.95	12.93	13.82	50.4	20.68	13.96	13.23	15.74	17.13	16.05	14.28	41.95	20.1	11.9	51.6	32.96	20.55	56.87	29.36	83.31	36.81	16.46	18.16	20.54	18.46	60.53	16.86	16.27	64.95	17.21	38.4
54575	UGT1A10	26.98	112.2	8.06	0.4	26.53	0.42	0	0	0.55	0	39.21	9.18	0	0	12.46	0.45	17.42	0.81	0	0.39	0	0	0	0	0	7.57	0	2.56	7.4	0	0	55.11	5.71	0.4	77.62	0	23.91	0	0	1.05	0.91	0	4.58	0	1.9	0	0	3.09
199720	GGN	2.61	2.31	1.2	1.93	1.91	2.95	2.17	1.1	2.03	3.31	2.95	4.23	2.31	3.44	3.88	4.29	2.6	2.28	1.1	2.32	2.1	2.55	5.14	4.11	2.77	0.57	3.01	4.58	3.26	1.03	4.83	1.09	1.97	2.5	1.29	2.22	3.49	2.53	2.11	2.9	3.56	2.53	3.04	2.42	1.55	1.61	4.41	1.92
8480	RAE1	22.98	42.22	24.63	28.88	26.75	50.93	11.47	65.47	37.28	43.4	32.31	23.73	18.53	33.05	19.81	25.65	34.09	35.58	15.6	21.41	24.83	24.44	14.54	21.94	14.88	45.55	18.62	67.98	21.11	23.99	26.98	55.87	24.56	45.57	16.46	52.28	25.49	43.31	19.58	18.37	21.57	18.41	18.38	37.42	16.37	34.65	22.17	34.43
199221	DZIP1L	17.06	17.29	11.56	62.21	12.47	65.42	18.38	30.8	46.85	93.3	19.94	33.55	24.14	27.09	26.66	41.93	30.37	30.87	15.77	17.07	37.65	31.71	25.22	41.39	16.12	37.01	21.16	20.09	21.58	30.64	3.69	16.39	17.72	37.14	12.86	42.38	31.97	67.13	15.43	26.01	42.43	20.55	36.41	13.67	15.11	22.62	35.38	40.09
64105	CENPK	11.36	20.59	13.76	14.9	11.72	31.1	9.33	17.58	20.59	16.59	20.48	22.41	16.85	18.11	15.03	18.41	17.87	21.61	6.48	10.84	18.98	26.38	21.35	18.39	7.29	16.92	12.88	29.41	20.01	15.48	38.97	28.66	6.92	42.43	14.13	17.36	22.53	20.62	7.4	13.03	24.86	10.46	16.93	11.81	12.83	29.55	21.41	13.89
126375	ZNF792	8.88	7.62	5.33	7.43	5.7	7.62	4.45	5.12	4.5	1.85	4.99	7.53	5.32	2.77	7.71	7.55	5	6.18	8.93	12.04	3.35	6.65	5.35	7.06	6.27	7.16	6.96	3.88	4.38	10.37	14.13	6.81	7.16	9.07	3.98	3.8	3.71	1.46	4.92	4.71	4.27	4.39	5.83	2.79	6.99	3.56	5.78	4.9
1585	CYP11B2	0	0	0	0	0	0.17	0	0.14	0	0	0	0	0	0	0	0	0.21	0.18	0	0.15	0	0	0	0	0	0	0	0.19	0	0	0	0	0	0	0	0	0	0.18	0	0	0	0	0	0	0	0	0	0.16
1859	DYRK1A	69.35	70.44	62.36	69.09	60.63	86.2	70.18	87.14	74.32	64.17	57.27	75.49	76.3	85.05	72.62	58.74	81.65	71.63	80.58	83.35	61.63	71.3	81.25	80.07	80.27	73.83	85.06	58.9	56.37	77.57	101.67	66.33	79.01	75.07	65.57	46.41	68.96	47.57	87.35	83.48	83.38	79.99	53.94	41.99	65.21	59.1	80.08	56.22
51440	HPCAL4	12.6	0.11	5.8	0.11	14.89	1.31	0.29	0.55	2.14	0.47	3.55	0.13	0.38	0.98	2.08	0	2.6	0	0.28	0.54	1.7	0.42	0.25	0.57	0.2	0.14	0.27	0.25	3.65	0	1.11	0.63	3.94	0.42	0.11	0.28	2.69	0	0.19	0.14	2.93	0.1	1.27	0	19.83	0.82	0.14	0.32
5425	POLD2	77.68	148.58	94.26	100.61	97.59	133.38	75.62	119.86	115.63	185.42	110.18	73.2	41.97	237.47	73.18	81.68	71.19	49.12	74.5	81.84	71.23	59.9	49.68	31.49	67.87	74.32	61.11	175.78	94.56	56.08	60.22	143.73	53.37	114.42	83.65	123.14	48.68	226.2	53.15	40.12	62.03	69.09	58.92	123.04	45.46	111.54	56.81	116.74
79295	OR5H6	0	0.47	0	0	0	0	0	0	0	0.39	0	0	0	0	0	0	0	0	0	0	0	0	0	0	0	0	0	0	0	0	0	0	0	0	0	0	0	0	0	0	0	0	0	0	0	0	0	0
340578	DCAF12L2	0.48	2.75	0.72	1.27	0.14	0	2.79	1.77	0.87	0.41	2.26	2.33	1.64	1.16	0.79	0.19	0.44	0.39	3.57	2.01	0.2	1.55	5.57	0.46	2.54	0	1.06	7.52	0	2.17	0	2.35	0.52	0.68	0.34	0	0.23	1.36	2.6	1.11	0.22	1.89	0.32	0	0.31	0	2.68	0.17
126119	JOSD2	38.85	47.47	39.5	39.7	39.27	60.66	38.11	28.47	41.1	46.61	41.15	37.65	39.31	58.38	42.41	34.54	29.34	46.63	44.89	42.72	33.23	28.52	30.66	25.3	32.89	46.14	41.78	52.71	32.8	39.93	17.71	48.04	31.73	32.92	40.49	68.86	27.57	33.37	36.97	35.76	34.98	49.59	34.62	21.46	39.6	31.76	37.97	41.57
55636	CHD7	20.39	41.53	26.51	19.4	24.22	31.61	13.8	36.01	30.63	22.89	41.05	27.47	20.37	54.93	21.24	14.42	32.59	36.67	12.57	27.27	62.45	40.81	15.06	38.08	17.11	53.45	15.92	27.06	22.32	19.39	53.29	18.99	18.57	13.66	30.56	19	32.25	36.38	12.71	19.94	27.9	15.64	23.6	18.14	14.07	270.81	17.31	28.62
57332	CBX8	1.55	3.53	1.18	2.15	1.96	3.81	2.3	5.77	1.8	3.34	3.22	3.14	3.19	4.83	1.03	1.84	2.96	3	2.09	2.75	3.35	4.26	0.76	4.6	1.53	2.03	2.2	3.61	1.88	0.8	1.98	5.76	1.55	6.67	1.91	1.98	0.5	4.88	1.48	2.31	1.6	1.05	3.16	1.77	2.07	4.51	2.31	2.91
7561	ZNF14	10.34	12.89	8.67	14.53	9.37	10.64	7.03	12.07	12.48	10.79	12.05	10.95	10.85	5.24	13.67	8.89	11.84	9.87	11.25	13.26	15.64	16.37	11.23	16.42	10.28	11.99	11.38	17.07	11.01	17.71	19.68	7.33	11.08	18.05	12.33	8.62	15.17	11.18	9.42	12.76	13.74	9.94	14.62	6.16	10.79	19.39	12.76	10.05
1122	CHML	11.48	14.98	12.16	17.84	10.22	13.09	8.57	34.74	15.33	16.8	12.48	15.06	11.3	13.29	14.66	18.56	13.02	12.28	8.85	14.69	12.67	16.47	13.09	18.82	10.18	21.42	12.7	17.84	11.31	14.73	22.01	19.07	10.57	34.66	10.7	18.32	13.96	18.75	10.09	10.31	12.45	8.85	9.31	14.07	9.69	35.42	11.36	11.92
8893	EIF2B5	33.9	49.57	28.41	36.09	33.15	60.25	20.23	62.37	64.73	93.05	42	38.2	23.96	84.25	32.08	36.73	36.58	52.06	26.45	41.05	63.17	64.05	27.25	32.48	25.6	79.59	29.43	53.2	34.01	32.07	42.29	83.93	25.12	71.78	31.14	50.36	41.16	35.85	25.76	27.2	45.95	29.11	31.23	48.17	27.6	51.71	31.39	66.26
50509	COL5A3	23.44	10.77	15.13	126.21	13.53	72.07	28.72	14.22	18.64	35.7	9.15	17.34	29.42	39.64	22.45	159.89	16.23	64.54	32.69	21.86	20.92	50.66	37.55	25.91	30.07	42.71	34.68	19.18	14.21	17.75	6.35	7.78	22.2	10.72	14	51.77	10.79	45.48	29.22	25.21	34.94	32.63	10.88	88.75	12.92	11.52	19.26	13.85
27146	FAM184B	12.11	12.12	9.12	9.84	10.27	10.48	8.9	6.26	9.26	5.33	11.08	14.38	12.91	8.58	15.55	9.36	14.12	8.8	9.17	10.05	10.87	11.34	12.13	15.49	10.63	14.59	15.69	14.59	11.45	16.96	20.84	6.87	12.96	14.21	9.66	6.38	13.26	11.65	10.26	13.11	14.2	10.45	8.5	7.57	9.88	15.35	16.04	7.47
57050	UTP3	16.76	12.49	12.88	14.13	17.06	15.29	17.06	20.88	26.1	20.51	17.2	17.12	17.99	13.72	16.55	10.62	16.37	11.53	12.41	18.95	9.03	15.1	10.62	13.76	17.2	15.23	9.46	13.57	13.16	13.29	32.22	53.09	22.63	19.12	15.77	14.25	20.17	21.04	13.65	16.72	18.9	18.78	11	11.39	14.46	11.19	13.96	16.65
4240	MFGE8	191.32	105.3	136.97	316.03	94.85	218.38	296.69	120.11	129.42	112.6	96.88	243.91	281.04	158.89	220.11	202.49	165.31	215.86	184.1	210.55	97.21	190.33	227.05	259.58	268.9	135.48	327.4	111.19	95.69	227.86	99.89	42.56	204.29	175.4	133.46	139.19	166.65	114.36	208.11	245.29	244.67	303.77	82.52	101.27	243.52	145.83	393.76	109.62
388646	GBP7	0	2.12	0.17	0	0.16	0	0	0.34	0.2	0.7	1.22	0	0	2.21	0.23	0.44	1.54	1.56	0	0	0	0	0	0	0.55	0.53	0	0.23	0.2	0	0.88	2.05	0.2	2.08	0	0.8	0.26	0.67	0	0.78	0	0.18	0.19	0	0.36	0.77	0	0.88
79074	C2orf49	34.38	38.2	30.13	32.78	28.43	34.33	23.52	29.62	32.3	30.87	40.12	51.19	39.34	32.27	44.01	37.11	53.55	30.49	32.5	30.67	42.23	48.87	37.42	38.83	27.49	47.28	43	49.44	40.81	42.32	49.2	26.65	30.84	60.59	34.89	28.64	44.78	35.02	32.21	32.96	44.35	30.2	29.2	23.48	39.06	48.33	50.26	31.88
107986244	LOC107986244	17.07	30.29	23.36	20.76	11.4	29.34	18.81	13.8	31.92	21.41	34.83	30.67	39.75	11.48	32.83	37.24	55.91	32.61	15.49	18.15	32.46	42.13	26.72	41.16	15.03	25.1	35.85	36.21	33.53	34.92	48.07	27.93	21.97	41.26	17.61	27.83	46.13	34.09	20.65	26.95	31.96	15.16	26.94	24.48	18.5	36.11	45.48	21.47
2824	GPM6B	14.48	3.75	10.08	18.26	7.59	14.94	52.23	11.84	8.04	5.45	7.33	26.15	18.23	3.59	28.62	18.01	11.42	11.35	49.29	23.55	6.09	21.7	59.15	8.12	60.13	4.53	49.7	5.04	11.28	28.04	8	4.69	40.33	7.4	14.58	5.64	11.43	5.58	42.39	20.91	19.87	51.25	8.68	9.27	15.69	11.16	22.32	4.03
387	RHOA	515.03	398.03	452.05	403.41	448.19	397.73	533.64	309.27	425.76	358.12	334.54	381.13	413.46	328.29	425.23	359.97	314.24	439.75	518.46	546.34	254.31	355.85	369.98	421.87	511.87	225.18	577.97	289.4	396.49	438.11	447.75	325.57	463.4	258.02	350.78	373.46	310.89	248.41	486.06	392.54	305.96	542.89	363.36	315.77	410.99	510.3	351.52	332.17
389376	SFTA2	27.74	1.27	24.97	0	33.69	0	0	0	0	0	16.84	1.47	0	0	8.21	0	0	2.66	0	0	1.36	0	0	0	0	0	0	4.21	22.16	0	0	0	21.75	1.56	13.05	0	14.08	0	0	0	0	0	45.87	0	1.07	0	0	7.08
107987290	LOC107987290	16.19	2.03	7.07	3.86	10.14	33.56	9.57	7.93	3.62	2.67	4.3	13.73	11.54	5.42	2.9	6.09	1.72	2.64	0.98	1.97	1.34	1.89	0	0	14.78	3.69	12.86	14.92	1.55	2.28	1.52	3.72	3.12	21.01	2.11	1.52	12.98	17.74	10.22	8.09	4.9	5.04	10.34	0	9.84	10.47	17.91	8.8
84075	FSCB	0.14	0	0.13	0	0	0.16	0	0	0	0	0	0	0.18	0	0.35	0	0	0	0.13	0.28	0	0	0.18	0.2	0.14	0.41	0.19	0.36	0	0.77	0	0	0.16	0	0.31	0.2	0	0	0.27	0.2	0.19	0.14	0.56	0	0.28	0	0.79	0
2961	GTF2E2	52.45	113.07	54.21	57.1	57.35	88.38	42.75	54.02	72.62	80.13	80.23	80.78	54.39	56.09	56.62	66.63	72.36	60.42	52.14	53.09	98.13	84.47	57.83	75.1	43.79	88.01	64.87	85.33	65.4	64.37	107.05	73.99	62.79	84.2	87.64	69.32	76.67	85.36	51.94	70.52	82.75	56.32	66.33	64.01	50.74	86.61	74.76	80.72
28960	DCPS	21.68	28.55	19.69	23.65	18.88	25.07	18.06	24.73	30.06	30.32	29.69	26.66	26.28	25.42	30.04	26.83	34.76	31.14	22.79	24.64	34.12	36.76	26.25	31.44	14.63	33.17	27.49	33.59	22.86	25.56	44.31	23.48	18.57	39.3	23.09	25.35	27.14	30.82	18.69	27.05	35.8	19.47	21.1	15.59	21.46	31.16	29.57	19.83
7384	UQCRC1	123.65	208.24	143.91	144.78	164.37	129.88	180.1	126.31	172.82	245.25	153.22	117.43	123.02	195.17	165.59	99.49	131.51	138.83	220.79	136.46	94.85	90.76	158.74	59.96	151.55	146.84	132.23	152.83	131.21	154.84	70.71	158.53	145.22	121.48	162.98	174.98	103.24	166.12	183.29	116.84	150.65	139.18	114.7	126.51	120.28	215.55	104.41	179.8
64648	SPANXD	0	1.29	0	2.51	0	0	0	3.64	0	0	0.75	0	0	0	0	0	0	0	0	1.34	0	1.92	0	0	0	0	0	0	0	0	0	0	0	0	0	0	0	0	0	0	0	0	0	0	0	0	0	0
6573	SLC19A1	20.43	24.54	25.53	62.43	18.51	58.62	24.06	34.67	30.75	34	20.53	28.3	36.07	31.27	32.96	61.71	24.23	50.17	21.99	48.25	19.7	29.19	24.72	58.82	36.04	51.68	22.94	36.83	19.03	18.2	24.05	26.52	34.67	50.68	22.39	29.63	22.47	26.02	29.66	46.18	41.22	38.76	21.72	47.2	52.07	21.88	31.9	22.08
64778	FNDC3B	78.07	117.14	57.72	203.77	51.99	221.33	93.45	102.33	151.63	184.24	54.38	119.35	133.57	205.2	87.33	174.59	118.03	195.35	78.96	143.12	141.17	204.53	85.7	197.31	111.97	228.89	93.11	89.1	33.01	95.2	66.47	81.09	77.48	189.36	59.74	188.08	73.66	92.85	112.81	121.26	100.82	114.37	71.66	184.43	101.82	96.72	101.91	90.84
94120	SYTL3	52.14	46.71	50.92	44.5	60.05	45.84	35.96	35.99	51.15	32.56	65.17	47.69	41.48	36.92	52.03	45.34	61.8	40.63	34.25	38.9	77.85	49.52	63.98	63.65	29.34	55.8	48.78	44.25	44.95	36.45	79.94	50.18	47.04	38.7	73.02	54.66	61.32	38.52	27.47	35.19	55.11	33.03	54.02	45.55	35.79	45.66	37.28	47.03
151242	PPP1R1C	0	0.57	0.13	0.73	0	2.9	0	0.14	5.28	6.32	2.48	1.98	1.09	6.33	1.6	0.61	0	1.98	0.14	0	0.61	2.27	0	1.43	0.99	1.42	0	1.26	1.05	0.2	1.32	2.12	0.93	0.7	0.69	1.39	0	4.48	0	0	0.67	0.92	0.98	3.18	0.48	9.61	0	2.81
22902	RUFY3	51.05	38.59	51.39	48.19	57.64	43.69	47.19	48.77	50.53	38.08	50.44	54.25	51.51	25.41	67.62	47.56	53.9	48.73	40.6	43.2	71.61	73.84	55.85	71.58	45.84	44.3	56.43	33.05	72.19	83.55	65.16	63.03	73	55.64	61.18	24.27	85.75	31.38	47.79	70.56	65.79	45.8	74.37	33.04	59.66	29.72	79.12	49.8
5243	ABCB1	8	5.86	7.73	2.56	5.44	3.96	5.16	3.36	4.08	1.79	4.86	5.1	9.29	0.26	8.49	2.9	5.67	4.25	4.87	7.95	3.02	8.76	3.58	8.51	6.57	1.11	5.2	1.87	5.74	6.59	9.57	6.38	7.93	2.78	4.69	0.54	4.33	0.82	5.33	7.33	6.28	7.78	2.24	1.53	6.1	0.9	3.81	1.95
1291	COL6A1	585.51	203.25	463.12	1856.67	332.92	1216.51	1116.43	334.88	356.21	400.85	194.29	872.55	1299.61	674.03	667.44	1872.86	312.58	848.21	1450.9	866.32	264.77	937.74	1631.75	1391.06	1194.01	233.05	1139.75	297.01	196.33	1353.63	99.53	79.93	834.36	250.88	524.36	637.12	296.78	355.46	1462.89	1071.96	1199.8	1016.27	171.58	785.08	671.04	82.09	958.79	160.12
4482	MSRA	14.32	15.07	20.17	21.95	22.49	13.27	26.92	8	14.72	11.69	21.48	32.45	22.15	12.63	27.52	13.33	25.92	14.1	29.64	23.98	15.58	17.93	32.68	26.46	28.47	9.67	27.64	8.51	21.24	27.71	26.46	4.51	19.72	18.42	20.34	5.13	24.1	7.43	30.09	33.99	25.9	21.81	15.55	13.13	21.96	21.71	24.18	12.34
83595	SOX7	39.08	35.46	49.24	25.3	41.22	72.35	113.03	29.46	57.59	68.64	64.2	30.94	56.77	21.77	41.85	33.32	55.48	27.88	31.19	45.05	82.72	56.67	30.01	35.7	62.43	59.03	49.05	104.65	51.26	29.74	19.9	15.56	74	49.65	47.95	16.79	40.1	25.91	44.61	51.43	56.29	51.54	23.44	34.47	18.89	16.67	29.47	63.38
5211	PFKL	102.63	123.08	137.21	130.62	159.57	160.65	98.89	171.76	116.83	129.97	127.13	103.3	87.05	226.34	110.61	112.18	113.21	144.81	86.42	100.14	97.59	80.33	75.62	95.83	85.07	134.21	88.67	211.17	154.42	93.12	129.66	209.32	93.2	167.57	131.9	124.28	140.03	109.92	92.03	107.62	127.94	126	165.36	101.67	91.04	106.5	93.78	106.67
7874	USP7	67.09	59.75	56.4	61	60.56	58.43	54.81	104.14	75.88	69.75	62.03	59.52	52.15	79.12	66.67	69.57	86.89	73.46	58.05	74.09	84.6	69.22	59.12	52.18	60.17	61.21	57.93	58.91	59.55	64.58	77.6	96.7	61.81	99.12	58.4	45.55	67.82	109.08	63.53	61.46	64.4	56.4	49.69	45.75	53.22	39.55	57.68	59.65
255252	LRRC57	71.17	89.02	67.72	100.36	66.26	110.97	63.72	72.08	78.19	78.5	102.63	115.55	106.49	61.02	100.07	97.37	141.5	105.14	63.29	64.57	125.26	116.12	109.01	128.2	58.23	145.26	109.42	123.32	100.56	107.28	155.67	72.55	77.57	116.29	92.35	83.51	127.38	105.6	61.48	95.91	131.69	69.52	87.5	57.88	75	141.94	123.34	85.19
27085	MTBP	8.75	15.72	7.16	10.5	7.32	20	4.75	17.96	20.28	27.28	13.84	13.17	8.74	18.69	9.44	11.76	18.32	12.57	6.13	9.35	20.19	17.33	8.96	11.35	6.76	21.44	10.17	20.22	12.59	9.46	16.93	19.05	9.25	29.76	14.79	14.31	12.95	27.28	5.89	7.48	13.87	6.01	11.26	11.7	7.97	44.28	11.6	14.13
5009	OTC	1.23	0	0.27	0	0	0	0	0	1.33	0.38	0.44	0	0	0	0	0	0	0	0	0	0	1.13	0	0.59	0	0	0	0	0	0.55	0	0	3.13	0	0	0	0.58	0	0	0	0.55	0	0.4	0	1.98	0	0	0
51496	CTDSPL2	31.68	32.5	22.65	29.21	23.38	56.61	28.25	56.72	50.41	49.86	22.41	34.33	24.84	34.85	25.43	26.3	40.7	33.33	24.04	32.99	35.54	33.81	25.72	30.78	31.64	20.87	26.63	35.61	20.53	30.23	45.33	22.69	34.2	44.51	31.7	20.73	19.05	29.38	27.24	22.82	26.87	22.34	24.87	21.66	24.14	34.26	26.18	32.87
332	BIRC5	9.92	30.15	8.74	14.86	15.82	57.74	0.35	47.05	49.78	91.88	24.23	13.58	4.55	29.66	5.34	28.77	25.39	30.45	0.96	15.83	27.54	16.05	1.74	3.87	2.82	21.49	3.43	29.27	15.29	2.43	20.56	75.5	4.96	44.95	14.39	51.08	9.04	49.08	1.89	3.76	3.89	3.88	5.13	45.49	4.81	44.68	1.95	30.1
6188	RPS3	798.11	1029.91	930.36	498.02	736.35	425.36	493.58	734.06	1731.63	2062.12	669.87	468.03	355.04	2580.69	579.6	288.96	539.13	387.79	497.09	616.94	382.48	689.7	391.95	497.47	296.96	726.6	386.91	446.85	842.51	501.47	917.43	426.89	489.62	830.77	575.88	181.52	325.54	319.96	439.17	344.51	344.49	475.09	515.88	1132.31	589.53	662.01	320.44	827.75
2068	ERCC2	16.75	28.35	15.23	26.63	16.24	28.2	18.98	15.39	22.23	21.82	22.17	21.73	21.82	21.9	15.94	25.67	24.52	33.09	17.31	22.12	22.51	19.9	17.13	24.03	18.19	24.65	16.5	35.8	19.07	21.81	30.17	18.17	14.52	48.28	21.75	38.25	22.57	32.01	17.3	19.55	24.54	14.46	18.35	22.24	17.8	43.08	22.56	21.02
9159	PCSK7	325.97	105.5	322.34	588.86	238.27	211.65	1475.56	192.23	166.84	84.12	170.7	1054.24	1271.22	108.04	516.99	157.12	217.97	210.96	1557.88	699.09	101.8	386.48	1474.05	213.64	1390.14	76.22	1185.05	73.64	122.74	1387.3	126.28	35.31	853.7	82.91	866.1	79.84	290.7	81.88	2112.41	1821.96	889.51	1325.05	182.86	50.04	528.27	71.7	1413.52	124.23
9500	MAGED1	63.75	128.93	63.93	158.58	54.19	115.71	83.4	136.54	79.96	54.92	65.2	69.45	90.29	124.06	89.36	164.26	86.8	99.21	83.39	95.15	44.33	88.01	82.41	142.39	70.03	131.75	70.29	192.84	53.15	76.14	67.62	98.47	62.51	123.1	58.03	141.85	43	64.21	76.84	76.1	78.34	65.82	53.62	67.38	80.43	86.81	67.06	43.8
22841	RAB11FIP2	18.37	13.47	16.74	21.49	14.21	16.42	26	20.23	17.64	14.34	14.23	20.8	26.54	9.47	22.67	13.25	20.86	17.92	31.59	31.19	13.92	17.79	29.76	26.84	32.38	15.7	32.16	14.94	9.89	38.44	24.78	16.39	28.58	25.15	15.92	12.43	17.58	10.3	29.23	27.88	23.48	36.54	16.15	6.04	22.82	20.13	40.98	10.71
7809	BSND	2.79	3.38	2.21	3.43	2.49	3.47	2.72	2.63	3.99	2.95	5.21	4.71	4.2	2.44	4.87	4.26	6.74	4.35	1.46	1.74	5.94	5.71	3.4	5.06	1.7	6.45	4.92	3.92	4.29	3.8	6.48	3.39	2.42	4.79	3.49	4.66	4.85	4.34	2.36	4.27	4.99	2.49	4.29	2.08	3.25	6.8	4.35	3.13
1006	CDH8	0.41	1.56	0.01	1.06	0.2	1.99	1.47	2.27	1.86	2.83	0.94	1.06	0.77	3.04	0.74	0.54	0.8	1.12	1.29	1	2.55	6.58	1.48	0.75	0.86	3.06	1.04	1.82	0.36	0.72	1.07	0.99	0.69	4.06	1.23	0.07	0.29	2.97	1.41	1.49	0.78	0.98	0.38	1.03	0.23	2.69	0.96	1.28
1577	CYP3A5	42.41	25.02	18.18	7.6	44.38	8.71	7.7	8.97	17.96	9.02	52.15	13.89	9.41	4.11	45.55	5.95	49.29	13.54	9.04	7.13	30.19	20.41	8.05	14.72	6.17	9.36	10.8	12.73	59.42	9.49	10.3	17.68	30.61	8.41	48.34	4.83	89.45	4.29	5.28	6.63	25.41	5.37	107.35	3.46	16.14	11.44	6.42	22.74
58492	ZNF77	4.51	4.06	2.39	3.76	2.89	4.4	2.3	7.9	5.5	4.14	5.45	3.77	3.34	3.43	4.4	3.67	3.67	2.92	4.18	2.52	6.11	5.57	2.44	2.72	3.05	7.44	2.2	4.81	3.5	2.39	3.37	7.68	2.65	7.66	5.2	2.96	5.69	2.4	3.38	1.65	6.53	1.95	5.88	1.51	2.78	9.32	1.54	4.24
168451	THAP5	34.23	41.41	28.5	36.79	26.61	40.01	33.61	64.24	49.77	40.35	36.83	54.98	40.19	28.17	41.96	40.75	66.08	48.2	36.86	36.73	41.4	48.93	43.18	53.02	35.11	57.33	49.03	57.4	29.19	52.96	66.24	43.13	35.75	45.26	36.17	38.28	30.6	40.34	32.76	35.54	46.96	28.96	34.71	33.16	33.23	55.83	56.67	40.29
107984203	LOC107984203	20.69	28.35	17.16	24.04	10.46	22.51	13.38	17.18	24.79	22.59	15.66	25.96	25.67	27.41	28.84	27.4	27.16	24.3	15.71	18.94	30.61	38.8	21.98	37.29	17.78	27.26	27.56	21.85	19.72	35.42	41.28	19.58	16.21	47.39	19.9	32.19	20.36	26.95	16.34	19.59	21.38	11.78	16.41	18.97	18.12	30.42	28.72	15.37
390078	OR52E6	0	0	0	0.54	0	0	0	0	0	0	0	0.63	0	0	0	0	0	0	0	0	0	1.32	0	0	0	0	0	0	0	0	0	0	0	0	0	0	0	0.58	0	0	0	0	0	0	0	0	0	0
22949	PTGR1	47.42	37.49	102.07	101.69	124.71	54.71	38.54	268.79	44.86	47.33	85.54	127.53	56.33	34.19	71.09	36.21	41.15	28.13	47.62	90.38	40.11	64.6	41.3	31.94	47.06	41.97	49.55	37.87	191.06	53.35	15.67	33.45	66.31	43.41	38.76	19.7	84.09	164.73	48.27	63.11	55.32	58.14	80.63	35.78	40.87	27.09	65.69	36.06
1730	DIAPH2	41.46	25.49	26.76	42.45	25.14	20.98	60.43	73.31	32.15	19.26	24.05	55.04	57.68	13.8	38.54	19.62	30.73	23.36	46.31	43.06	25.88	58.09	55.74	38.24	56.83	35.55	54.97	35.83	22.95	63.49	23.31	17.91	55.48	25.98	35.88	4.91	31.33	19.43	51.16	53.21	56.18	46.61	33.01	17.05	31.75	37.88	54.64	32.2
126549	ANKLE1	32.63	39.13	27.61	37.02	24.89	30.88	26.35	26.2	31.81	31.05	42.07	50.24	52.99	25.42	44.51	40.26	60.75	48.63	24.22	30.23	47.01	49.7	50.58	56.71	23.34	50.24	50.64	59.57	39.59	61.58	78.55	33.17	31.75	54.23	29.05	32.91	43.1	32.98	23.61	34.12	50.87	24.31	28.52	18.58	22.69	46.41	54.86	30.43
57504	MTA3	39.66	36.14	32.65	28.59	34.03	35.68	30.56	39.94	40.52	33.82	40.23	38.44	41.21	22.92	37.66	32.37	45.1	34.29	31.41	32.62	45.62	49.16	44.63	41.05	37.34	43.01	46.67	38.79	45.98	45.12	39.98	40.43	39.91	80.22	39.25	33.8	43.48	49	31.11	32.32	40.93	32.86	44.6	24.21	38.11	53.34	49.59	31.02
55160	ARHGEF10L	72.56	42.51	74.34	53.24	71.06	33.39	75.14	31.35	41.11	28.96	68.93	65.12	64.15	27.34	90.38	37.17	37.42	44.23	68.06	57.78	77.56	47.36	73.38	41.79	78.79	23.44	74.42	21.69	86.11	69.25	11.76	42.9	67.33	20.96	77.78	25.32	138.35	30.06	53.1	80.48	108.07	93.01	102.52	26.14	73.38	23.34	103.86	53.73
118813	ZFYVE27	21.23	34.02	25.87	30.99	20.5	38.53	20	34.58	38.33	41.95	29.33	32.77	22.56	28.26	26.18	34.29	33.75	40.21	18.23	29.2	43.75	24.95	25.13	39.06	19.13	53.53	26.81	34.42	31.08	22.3	45.41	31.04	21.17	51.08	27.82	28.95	41.41	36.55	14.77	24.36	31.81	25.73	36.8	29.64	29.07	97.45	40.93	23.12
81562	LMAN2L	14.87	16.74	13.95	14.35	12.53	43.05	15.12	22.47	13.74	20.12	10.55	14.17	17.56	32.4	18.11	12.56	15.17	10.26	15.45	19.15	10.51	18.1	22.44	8.66	22.98	31.42	24.79	14.95	9.16	20.4	9.18	18.11	17.05	45.76	12.06	34.44	13.08	21.2	28.11	15.07	16.11	18.17	11.26	11.15	17.57	15.08	16.87	14.6
284948	SH2D6	11.62	12.66	8.06	11.17	7.67	8.22	5.72	7.37	10.38	8.13	14.75	13.34	6.36	6.18	12.15	11.4	16.6	13.73	6.8	6.5	14.97	14.64	10.18	16.27	6.18	15.5	14.98	16.88	10.02	11.11	21.16	6.88	5.52	15.96	6.99	11.32	14.85	9.86	4.42	7.68	10.43	5.67	8.55	7.53	4.31	15.84	18.58	6.49
285489	DOK7	2.25	9.02	5.61	3.87	2.05	2.5	5.13	4.78	4.53	4.04	4.54	5.19	1.67	5.77	11.16	1.53	6.08	4.23	0.69	2.45	8.88	3.7	5.21	5.74	2.72	5.41	4.9	4.58	3.43	1.8	16.89	3.36	2.77	5.01	1.84	2.07	5.37	2.27	1.33	1.39	8.27	2.01	7.97	1.14	4.68	6.22	3.35	1.59
57093	TRIM49	0	0	0	0	0	0	0	0.62	0	0	0	0.2	0	0.35	0	0	0	0	0	0	0	0	0.39	0	0	0	0.4	0	0	0	0.84	0	0	0	0	0	0	0.37	0	0	0	0	0	0	0	0.82	0.48	0.34
28986	MAGEH1	19	16.61	12.83	18.24	8.24	18.87	21.73	17.98	15.75	7.41	10.99	20.08	24.27	13.72	19.54	18.05	16.63	23.18	29.61	29.3	6.59	17.47	15.04	32.19	24.06	9.44	25.12	6.01	4.66	21.83	13.61	15.91	25.52	7.11	9.48	11.41	5.8	5.35	33.55	24.57	17	26.92	9.04	7.4	26.31	3.43	14.51	8.42
746	TMEM258	44.96	82.6	55.48	32.91	47.68	48.71	41.85	80.08	40.51	39	60.49	53.9	39.36	68.39	54.46	44.5	49.48	52.97	40.09	46.54	30.57	39.04	31	38.14	37.8	54.38	35.23	72.69	53.4	43.9	50.8	50.97	38.99	36.2	31.16	30.01	21.13	71.36	34.17	49.6	25.7	36.61	30.32	45.99	43.44	21.41	35.83	45.19
84447	SYVN1	56.89	87.76	73.98	72.96	58.81	60.43	45.59	100.15	102.15	70.86	82.17	95.69	53.72	60.4	60.27	60.79	126.37	145.92	53.55	106.3	130.54	67.5	50.93	153.1	56.74	91.55	52.27	69.01	45.14	47.47	159.67	69.77	47.04	58.76	52.37	57.86	49.88	88.96	50.12	69.84	63.29	50.3	62.31	45.44	63.93	46.68	59.94	52.43
4907	NT5E	25.11	7.95	15.88	25.83	10.07	40.7	31.61	17.54	17.53	8.37	9.76	31.72	45.48	27.61	20.29	27.69	11.78	39.94	33.69	45.25	5.68	16.47	26.51	45.72	80.57	18.31	23.31	4.76	6.95	55.18	16.8	6.32	20.45	1.76	15.96	33.86	8.19	9.05	36.12	29.64	19.37	32.97	8.89	28.44	58.74	23.71	39.18	6.8
51252	FAM178B	1.63	0.77	2.44	0.61	0.26	0.88	2.62	0.54	0.5	0.55	1.17	3.82	2.77	9.35	1.09	16.8	5.06	4.13	8.53	2.61	0	1.49	3.48	1.55	14.48	25	11.57	50.66	0	5.86	1.72	21.03	7.08	1.22	4.05	0.75	2.29	0.61	7.76	5.25	3.52	4.23	1.07	0	1.05	0.73	3.76	0.27
7567	ZNF19	7.82	9.39	7.4	11.26	6.56	7.83	6.15	6.33	12.66	8.09	12.13	12.52	10.91	5.65	12.81	9.41	12.49	10.49	7.56	9.85	11.14	11.43	13.01	15.47	6.91	14.23	12.88	12.1	10.67	15.96	16.1	8.05	8.73	11	8.17	9.08	15.16	9.58	5.09	9.8	13.13	8.88	9.36	5.99	6.78	14.28	12.25	9.18
3185	HNRNPF	107.58	157.61	138.29	141.34	135.38	157.32	130.18	201.19	307.18	422.96	169.47	142.33	112.97	166.98	103.89	137.61	140.95	149.49	133.41	163.01	162.79	150.49	104.55	109.93	120.58	140.52	110.52	145.5	114.31	129.69	186.46	277	123.37	218.26	123.4	190.21	114.87	163.65	151.79	143.52	117.54	166.43	96.5	153.31	116.77	128.34	115.34	130.97
54836	BSPRY	18.17	11.61	20.01	6	30.86	2.48	0.2	14.05	13.37	10.66	22.85	7.83	2.8	4.61	18.13	9.41	6.14	6.73	1.61	7.32	27.84	16.5	1.73	0.88	0.95	0.29	2.56	5.18	33.52	1.11	2.55	6.71	7.37	2.58	8.68	3.6	25.25	9.55	1.37	2	7.41	2.27	41.84	12.34	11.75	4.71	1.42	15.64
23424	TDRD7	16.56	10.48	13.91	9.91	12.94	16.72	15.17	19.77	19.98	19.99	8.36	12.3	16.29	21.79	14.12	9.08	8.94	12.72	18.69	15.61	10.97	16.49	17.36	14.36	38.61	12.54	16.66	17.55	13.15	18.34	16.32	37.38	17.96	5.77	17.87	18.22	15.77	12.32	16.71	12.24	12.94	23.99	17.46	13.66	13	11.83	15.17	17.51
119391	GSTO2	58.73	76.23	62.35	70.42	52.23	71.16	38.89	45.45	67.27	49.82	98.43	94.29	81.21	65.91	97.71	76.83	114.71	83.96	39.49	51.64	86.01	105.78	82.28	92.27	48.69	105.36	90.73	102.88	84.31	81.4	119.56	72.74	60.53	140.46	73.26	61.92	101.43	99.87	46.06	65.34	99.69	49.79	67.25	48.51	49.44	161.92	97.94	61.56
1063	CENPF	8.85	15.39	5.85	17.54	8.98	27.31	1.22	43.71	52.24	84.42	13.78	10.02	2.83	26.92	5.4	16.2	18	14.36	1.19	10.05	28.13	20.75	0.96	3.36	2.54	23.38	0.6	30.45	10.01	1.77	15.84	64.71	5.46	71.37	19.52	20.15	7.79	48.88	0.99	2.63	4.73	2.78	7.27	25.19	2.09	42.53	1.19	27.17
9805	SCRN1	34.76	45.82	26.98	51.79	27.49	102.77	69.62	67.82	40.39	41.37	20.28	52.82	56.25	63.73	35.73	40.67	48	44.19	78.22	52.01	26.6	40.11	62.79	31.79	69.14	36.37	74.36	76.78	19.99	75.17	26.48	38.67	56.73	51.87	31.66	47.17	26.11	47.67	79.5	49.09	52.03	69.13	23.05	58.05	44.45	58.16	58.38	26.16
1159	CKMT1B	19.37	30.02	55.71	63.27	77.17	36.91	0.87	11.9	31.94	23.17	43.27	10.33	1.34	25.91	28.99	12.58	28.89	27.31	0.82	9.29	40.5	20.86	1.54	1.72	0	17.42	0	61.64	62.13	0	0	28.18	17.97	17.94	36.17	27.45	23.42	0	0	1.66	33.2	0	56.74	42.26	7.71	82.16	0	47.72
80765	STARD5	13.29	22.01	21.31	14.5	17.22	36.18	8.36	11.42	23.82	13.56	15.4	11.79	5.12	9.2	15.39	15.57	29.19	23.17	6.66	19.57	32.43	22.22	5.96	24.76	8.54	18.87	12.28	17.85	13.69	4.55	57.44	12.98	9.82	5.24	11.29	14.01	18.1	10.44	4.69	4.04	10.75	5.25	13.26	15.47	13.9	6.78	7.2	17.34
80305	TRABD	50.49	84.4	58.09	80.07	65.39	123	27.77	101.2	94.76	103.27	72.46	55.21	29.46	93.71	50.11	56.93	77.44	86.21	29.67	63.06	111.2	57.31	42.9	90.57	28.35	161.09	27.24	65.57	55.16	30.53	97.26	89.46	30.22	96.97	57.4	70.45	73.52	98.57	31.34	49.33	85.07	30.36	85.56	71.41	50.36	159.09	41.24	81.84
6405	SEMA3F	94.26	230.98	107.3	47.37	111.19	60.05	36.41	77.53	57.73	64.18	129.11	51.35	33.29	107.24	85.08	109.55	69.92	103.8	14.83	38.12	103.06	34.97	13.27	30.4	28.02	78.36	22.47	83.36	160.41	13.67	6.34	64.01	44.8	40.47	74.39	111.24	150.45	65.9	20.42	40.65	67.04	23.15	95.77	76.42	29.68	44.24	22.46	89.08
2038	EPB42	0	0	0	0.28	0.21	0	0	0.22	0.26	0	0	0	0.31	0	0.39	0	0.67	0	0.38	0	0.3	0	0	0	0	0	0.32	0	0.26	0	1.35	0	0	0	0	0.34	0	0	0	0	0.33	0	0.48	0	2.39	0.33	0	0
51154	MRTO4	67.16	90.21	71.92	103.27	75.6	107.97	62.22	97.1	112.15	112.19	121.55	105.61	78	93.62	98.94	105.3	124.05	114.17	53.61	67.53	122.03	104.36	74.58	113.8	50.73	161.17	88.46	141.4	100.96	88.08	154.08	124.47	72.98	120.08	103.96	115.49	114.55	125.52	48.27	82.32	124.21	66.86	87.58	93.17	65.89	193.7	115.13	105.4
2161	F12	4.56	12.58	5.4	6.77	9.16	9	0.23	5.27	11.41	22.02	11.97	5.39	1.13	12.99	3.26	8.26	11.94	8.93	0.22	6.24	7.93	6.95	0	2.06	0.47	6.13	0	9.11	12.36	0	2	15.78	4.18	12.45	6.67	11.64	4.74	19.98	0.69	1.99	4.69	0.47	3.07	13.76	1.62	18.51	0.67	12.77
10720	UGT2B11	0	0	0.37	0	0	0	0	0	0	0	0.44	0	0	0	1.01	0	0	0	0	0.32	1.02	0.56	0	0	0	0	0	0	0.43	0	0	0.37	0	1.15	0	0.57	0	0.99	0	0	0	0	0.41	0	0	0	0	0.23
390594	KBTBD13	0.29	0	0.26	0	0	0	0.28	0	0	0	0.47	0.38	0.18	0.26	1.06	0	0	0	0.13	0.14	0	0.2	0	0.21	0	0	0.38	0	0	0	1.39	0	0.16	0	0	0.2	0	0	0.14	0.4	0.19	0.28	0.28	0	0.55	0	0	0.15
127077	OR2T11	0	0	0	0	0	0	0	0	0.53	0	0	0	0	0	0	0	0	0	0	0	0	0	0	1.4	0	0	0	0	0	0	2.71	0	0	0	0	0	0	0	0	0	0	0	0	0	0	0	0	0
283742	FAM98B	9.34	10.53	9.32	7.68	7.84	21.07	10.5	17.29	11.63	10.55	12.11	14.48	10.76	8.52	12.65	10.61	12.77	10.6	14.1	15.75	6.71	13.58	10.43	9.16	16.03	6.2	12.21	11.82	9.5	15.92	21.53	9.65	14.93	12.67	8.14	9.85	6.15	7.11	15.6	10.83	9.81	14.28	6.1	7.12	9.9	10.72	11.55	9.18
2186	BPTF	46.72	45.69	39.18	43.01	35.35	50.7	43.83	51.84	52.6	42.26	44.61	50.02	43.04	36.92	47.14	38.39	64.54	46.79	45.88	50.75	56.85	56.27	47.1	62.25	49.55	60.06	49.06	48.81	46.24	47.4	85.34	49.41	52.6	61.02	47.39	33.89	51.59	49.88	41.18	44.59	58.38	37.1	46.52	28.08	40.46	86.2	47.73	41.97
92370	PXYLP1	6.67	9.9	4.33	10.05	4.53	9.75	5.67	29.98	13.24	16.3	4.74	9.97	7.11	16.32	7.07	5.55	9.7	5.4	8.38	9.14	6.28	19.64	6.23	11.44	8.96	8.29	6.89	13.93	3.17	4.28	8.31	11.3	5.09	28.88	2.58	4.18	3.98	1.86	8.93	7.11	8.51	9.53	5.2	3.2	7.91	12.25	7.61	6.39
9665	MARF1	59.01	56.88	54.11	57.25	42.49	47.12	63.13	60.08	59.4	36.7	46.09	67.28	60.42	39.78	63.29	43.5	62.02	54.48	80.96	80.12	55.57	55.61	65.36	68.45	79.44	60.57	76.09	45.58	38.18	72.77	99.1	33.76	61.04	76.92	36.56	34.21	43	47.69	67.77	54.11	56.19	68.72	43.18	35.54	48.06	24.51	71.62	33.62
51725	FBXO40	1.57	2.31	2.03	1.3	1.75	1.82	2.12	0.95	0.91	1.68	2.44	2.27	2.74	1.46	11.08	2.27	3.29	2.23	0.74	1.13	2.32	2.57	2.5	3.3	1.67	2.35	2.86	2.23	2.7	2.22	6.8	1.4	1.68	2.44	1.56	2.43	1.1	2.57	1.04	1.28	3.06	1.63	2.24	0.83	1.63	2.33	1.83	1.87
85459	CEP295	10.54	13.19	7.59	12.77	7.94	13.71	6.63	17.36	15.87	14.96	8.48	12.81	7.7	11.3	10.06	7.72	12.89	9.37	7.2	12.59	13.75	15.58	11.71	11.06	11.22	12.23	8.59	12.05	9.05	10.31	19.5	15.22	11.28	14.84	10.39	6.41	10.38	9.8	10.06	9.77	10.27	7.63	10.59	15.42	8.49	13.59	10.13	8.66
6555	SLC10A2	0.13	0.46	0.36	0	0.35	0.15	0.39	0.24	0.14	0.37	0.58	0	0.17	0.24	0.66	0.79	0.55	0.32	0	0.39	0.16	0.74	0.34	0.38	0	0	0.71	0.51	0.56	0.36	1.48	0.49	0.58	0.37	0.86	0.18	0.56	0.81	0	0.37	0	0	0.39	0	0	0.18	0.19	0
130075	OR9A4	0	0	0.38	0	0.73	0	0	0	0.91	0.4	0	0	0	0.38	0	0	0.58	0	0	0	0	0	0	0	0	0	0.56	0	0	0	0	0	0	0	0	0	0	0.51	0	0	0	0	0	0	0	0	0	0
143888	POGLUT3	61.98	75.44	49.8	58.11	40.97	78.98	47.68	56.12	52.28	42.35	52.89	60.92	62.89	45.88	64.07	50.23	54.96	61.27	47.22	58.94	48.95	78.13	57.13	84.47	63.81	76.79	69.4	63.64	52.75	67.09	48.56	35.94	66.32	79.11	50.89	45.95	54.29	43.84	57.21	58.32	63.87	72.47	43.19	23.11	69.07	50	64.12	35.25
51023	MRPS18C	19.45	17.91	18.97	9.51	20.6	19.21	12.04	25.29	15.12	12.68	13.67	22.68	12.01	13.83	15.57	14.05	14.88	15.33	17.57	14.31	9.69	12.68	15.53	14.35	15.8	9.19	15.53	13.6	14.48	11.27	14.13	9.6	17.65	15.92	8.27	5.68	15.34	5.74	10.35	6.59	10.05	13.29	13.86	10.63	14.19	11.99	7.8	7.18
149281	METTL11B	0.23	0.52	0	1.29	0	0.71	0	0.42	0	0.4	0	0	0	1.03	0	1.62	1.26	1.37	0	0.22	0	0.88	0	0	0	0.32	0	0.58	0	0	0	0.59	0	0.32	0	0.32	0	0.82	0	0	0	0	0	0.48	0.22	0.31	0	0
514	ATP5F1E	17.69	17.49	19.38	18.16	24.04	25.39	25.71	23.45	23.14	21.32	19.31	18.46	20.7	11.72	20.45	22.33	18.29	22.86	22.68	19.19	11.51	15.18	18.1	15.41	23.44	17.39	17.99	25.51	22.11	13.38	20.75	22.38	22.23	10.24	16.4	19.21	9.24	15.08	17.95	16.97	15.44	23.93	21.92	23.39	24.73	11.72	18.2	20.93
7314	UBB	706.71	809.51	695.27	560.66	590.63	993.29	937	730.64	782.24	1093.41	619.01	698.42	869.22	1204.48	769.22	622.77	645.63	722.14	996.99	988.7	328.55	663.39	968.21	554.26	988.06	555.52	859.4	1098.34	471.36	908.26	1076.84	618.93	733.14	882.69	509.96	840.93	340.35	896.22	1066.12	653.77	730.58	1048.96	385.69	634.6	770.56	706.73	714.38	668.66
6002	RGS12	58.63	76.07	63.95	42.47	76.89	53.3	30.44	46.62	46.1	43.94	82.58	49.73	38.77	50.92	63.21	71.24	64.97	42.01	31.18	29.47	67.28	60.97	47.07	36.98	30.84	78.61	39.7	59.63	87.25	39.84	37.14	32.65	45.82	65.11	79.19	75.99	93.31	102.8	29.66	38.8	71.77	27.78	56.52	63.27	34.56	52.63	47.44	54.65
9098	USP6	2.66	1.67	1.52	4.37	1.42	2.92	1.99	0.69	2.76	2.48	1.35	2.97	2.85	2.11	3.46	2.49	3.29	2.92	2.28	2.38	4.95	3.36	5.02	6.58	2.83	3.47	3.51	3.02	1.89	2.09	5.69	3.81	3.5	9.64	2.42	2.95	4.47	6.36	2.46	4.17	9.6	5.68	4.2	5.88	2.73	1.38	4.26	3.24
54627	MAP10	0.65	0.93	0.81	1.75	1.34	2.7	1.02	1.12	1.5	0.31	0.97	1.08	0.42	4.93	1.31	2.03	3.49	2.25	1.66	1.57	1.4	1.57	1.36	2.1	1.53	2.66	1.4	0.82	0.69	1.1	3.16	4.62	1.15	4.11	0.44	1.47	0.92	0.3	0.7	1.24	2.08	1.27	2.17	2.42	1.57	0.22	1.13	0.09
10574	CCT7	112.2	141.78	117.78	144.69	114.63	168.46	119.82	225.88	190.19	314.9	160.96	136.35	97.81	169.15	109.31	131.62	120.87	151.2	155.59	180.67	127.44	127.39	102.58	75.65	138.05	205.38	96.21	265.31	113.33	128.5	125.34	267.92	123.51	232.14	153.22	161.12	105.01	216.81	140.14	121.22	123.62	150.86	80.3	143.65	97.92	225.12	115.44	158.56
56654	NPDC1	101.31	34.52	92.89	107.43	59.49	50.46	159.13	100.44	78.48	45.13	63.97	106.09	144.43	32.9	113.58	44.02	78.12	57.09	159.86	124.72	89.98	91.58	129.27	153.88	122.85	43.86	162.15	23.45	66.25	123.6	52.25	52.21	117.41	36.82	101.39	24.84	100.17	33.56	134.15	172.46	159.19	105.02	233.5	33.47	180.53	75.25	147.93	73.96
80063	ATF7IP2	14.25	25.01	13.11	16.92	11.45	8.69	6.55	6.98	16.62	12	26.83	17.5	10.84	18.93	13.86	16.41	27.34	16.45	8.9	15.45	28.45	38.36	15.72	23.65	8.96	20.85	13.04	29.14	16.52	14.52	40.48	23.68	13.24	45.25	12.99	11.01	27.49	14.54	7.19	10.76	19.05	9.99	16.09	11.09	12.19	18.4	22.65	21.75
6095	RORA	45.42	39.07	37.65	34.2	41.52	33.59	40.03	32.45	37.03	22.62	40.01	50.73	42.79	16.56	53.22	35.39	58.62	35.69	35.5	34.6	44.85	44.71	45.79	51.29	39.07	32.71	48	31.84	46.43	46.07	55.08	18.86	58.64	37.81	48.14	21.92	51.43	27.61	34.82	38.48	55.62	38.12	33.45	18.55	27.82	41.38	45.12	36.83
88455	ANKRD13A	49.76	43.34	63.15	39.16	55.11	38.19	54.78	51.92	54.1	35.4	41.59	50.61	51.41	33.45	50.86	38.51	52.51	48.96	61.34	57.41	51.72	48.57	49.24	51.6	53.86	28.05	60.54	37.51	59.86	63.16	97.73	54.69	61.79	24.6	47.95	53.97	51.29	31.79	53.89	60.44	51.11	60.25	45.5	43.46	55.43	64.78	62.32	37.6
153733	CCDC112	4.71	3.24	3.22	3.83	3.33	5.56	5.51	4.23	5.17	5.52	1.39	4.08	4.09	2.72	3.43	1.68	4.1	3.21	6	4.92	3.99	6.71	3.39	3.44	7.11	4.08	4.48	6.38	3.51	4.51	4.65	1.97	5.35	7.34	3.02	1.15	2.92	4.08	5.25	4.18	5.46	4.91	2.38	2.79	4.55	5.69	4.27	3.21
283149	BCL9L	76.29	120.45	85.18	109.52	72.02	110.48	82.67	123.54	100.95	100.86	82.58	88.95	79.48	92.78	77.04	97.46	74.38	84.89	92.64	101.47	101.54	116.42	87.36	83.42	92.15	107.05	88.18	65.76	78.45	78.22	96.51	48.11	66.58	82.94	68.74	102.52	79.75	63.01	70.53	89.43	102.55	70.26	72.67	75.08	48.45	22.37	110.81	70.22
27129	HSPB7	35.65	7.43	25.62	51.89	26.81	16.95	413.44	22.91	12.68	6.97	14.94	103.78	167.38	12.35	204.88	17.5	20.05	18.13	206.09	74.77	3.19	48.69	193.58	18.92	218.66	5.55	202.64	3.77	11.37	192.76	0.26	0.29	150.15	3.53	61.96	4.39	46.43	11.59	127.17	136.62	172.9	187.15	11.94	3.16	51.34	1.01	254.11	18.1
374887	YJEFN3	19.98	28.43	14.48	44.72	15.13	19.28	20.64	26.66	32.59	52.09	36.11	35.09	28.9	37.4	32.06	29.24	35.75	26.06	21.1	16.53	35.68	26.13	35.07	35.27	16.76	33.36	45.62	56.15	31.06	28.88	49.67	34.34	16.95	43.82	23.62	33.5	30.2	30.32	16.35	18.29	57.52	16.71	23.01	12.28	17.97	43.36	30.94	31.49
4074	M6PR	69.98	91	74	82.66	65.23	99.32	69.28	125.35	119.81	127.81	85.05	72.46	63.15	186.63	59.38	62.76	67.82	85.43	65.56	117.04	62.65	81.53	60.48	73.8	76.58	99.62	71.48	149.63	59.41	70.19	137.86	211.79	74.04	181.69	69.74	99.7	53.74	89.84	79.3	76.2	69.18	101.44	52.69	85.22	66.28	84.4	69.52	70.04
5328	PLAU	16.83	79.11	22.66	243.01	36.63	272.85	69.43	110.3	89.23	194.08	22.92	66.18	72.27	144.25	20.36	219.8	28.31	113.79	24.43	75.41	40.86	138.27	14.91	89.05	32.48	370.28	31.67	119.57	10.89	22.12	14.28	61.49	38.3	65.43	33.35	321.3	27.77	152.98	36.51	52.05	30.99	102.29	12.69	358.26	37.09	16.57	33.91	72.88
4778	NFE2	0.75	0.68	0	1.01	0.65	1.97	1.44	0.54	0.32	1.39	0.32	0.39	1.52	0.99	1.47	1.3	1.64	0.66	2.47	1.85	0.67	1.89	1.14	2.35	0.59	1.27	1.96	0.75	0.31	0.4	1.14	0.27	0	0.42	0.32	2.47	0.84	0	1.13	0.41	1.2	1.34	0.58	1.26	6.35	1.01	0	0.95
3224	HOXC8	0.74	4.45	0	1.68	0.16	9.65	0	3.07	2.61	4.18	1.21	1.47	1.19	10.41	0.46	2.65	3.08	4.46	0.17	1.97	5.92	8.46	0	2.4	0.55	11.62	0	5.18	0.59	0.75	0.77	5.95	0	27.91	0.99	7.74	0	7.19	0	0.77	0.25	0.18	0.55	1.58	0.36	26.42	0	2.18
9389	SLC22A14	0.63	1.44	0.67	0.76	0.41	0.25	0.43	0.41	0.23	1.04	0.89	0.55	1.14	0.81	1.54	0.53	0.92	1.07	0.58	1.07	1.29	1.54	0.57	0.47	0.97	0	0.29	0.83	2.07	0.61	0.93	0.57	0.24	0.94	3.34	1.59	1.91	0.54	0.43	0.58	1.47	0.65	0.66	1.42	0.43	2.11	0.62	1.42
64131	XYLT1	28.87	31.38	39.21	88.32	36.12	32.88	39.51	23.6	34.14	27.73	25.05	28.58	30.22	12.32	26.98	34.32	28.67	27.04	45.35	26.84	21.32	21.58	44.39	44.68	38.16	16.07	41.89	8.03	34.07	49.03	34.32	6.62	42.92	36.27	37.52	15.95	40.7	32.16	37.13	34.11	51.98	36.01	35	14.7	24.72	7.24	42.67	17.38
10221	TRIB1	72.4	76.61	82.07	81.83	54.19	60.17	172.58	121.93	113.97	57.58	124.89	160.61	414.35	83.5	84.96	57.67	171.97	111.78	114.51	95.26	92.41	104.46	139.18	240.88	174.96	147.13	100.99	95.21	27.07	44.99	76.79	29.27	180.84	65.49	377.66	99.34	69.34	58.46	225.92	303.34	184.83	317.18	62.7	48.28	351.86	203.87	184.2	126.04
1500	CTNND1	213.65	513.06	240.7	144.38	255.38	167.19	96.14	438.78	210.46	250.3	323.96	173.98	129.94	322.28	222.49	210.61	207.89	199.33	96.36	115.88	292.26	262.32	101.93	96.02	99.09	308.65	114.17	132.16	293.98	115.51	45.73	260.98	159.12	199.48	249.67	147.3	343.09	359.66	117.75	120.29	156.74	112.65	259.43	141.59	103.61	100.93	128.97	272.75
5979	RET	1.54	2.22	1.16	3.44	1.03	2.54	3.44	0.7	4.45	2.21	1.16	3.64	3.06	1.4	6.98	2.7	3.64	2.19	8.75	5.38	2.41	2.24	2.34	4.07	7.53	0.86	11.07	0.92	1.09	4.5	1.3	0.14	4.63	4.76	1.17	1.29	1.76	0.87	8.35	3.9	2.08	3.62	1.66	4.68	4.33	0.75	2.53	2.09
339779	PRR30	0	0	0	0	0	0	0	0	0	0	0	0	0	0	0	0	0	0	0	0	0	0	0	0	0	0	0	0	0	0	0	0	0	0	0	0	0	0	0	0	0	0	0	0	0	0	0	0
7867	MAPKAPK3	34.87	47.7	55.31	37.78	54.43	34.41	30.12	26.59	35.06	40.81	61.61	38.02	25.33	50.97	52.88	30.22	26.18	41.47	30.65	45.97	42.03	30.02	26.12	27.12	30.66	26.44	25.63	44.6	57.52	26.32	53.75	33.55	37.21	22.09	40.31	29.21	41.01	17.74	26.02	27.71	33.51	37.36	47.83	24.07	37.8	52.95	23.83	40.88
83443	SF3B5	90.7	104.99	119.41	107.08	134.13	148.66	113.58	152.32	139.68	147.39	105.79	91.69	81.64	210.25	88.19	116.71	104.47	91.55	113.88	127.81	63.92	111.82	80.28	74.76	106.47	106.34	102.67	86.07	100.43	97.54	81.94	209.07	103.28	101.19	82.29	153.38	62.01	88.76	104.94	88.54	76.54	124.87	118.37	182.49	130.11	104.16	86.8	134.55
151194	METTL21A	788.38	1473.46	692.04	1176.19	689.92	952.81	572.37	869.49	1275.68	1488.89	1189.84	1297.67	996.69	1918.93	1033.54	1289.32	1752.07	1880.22	628.78	669.64	1522.23	1291.49	1037.03	1394.08	568.59	2410.61	1048.07	1873.17	983.04	939.77	1407.92	2374.75	618.65	3264.46	895.43	1990.43	1263.95	2186.04	472.86	944.61	1433.42	655.61	954.57	759.23	617.91	1691.29	1120.67	1473.59
55070	DET1	11.47	7.27	8.9	7.37	7.55	8.95	8.6	11.96	7.06	4.26	7.12	10.95	11.37	2.61	7.71	4.55	7.11	7.6	13.37	9.34	6.29	8.52	11.43	7.08	11.32	7.02	12.53	1.5	5.76	13.9	8.84	2.71	10.2	6.23	3.3	3.75	6.69	3.93	14.75	7.67	7.43	8.85	9.34	0.86	9.55	6.55	8.51	2.32
2686	GGT7	28.38	38.35	27.87	38.14	22.19	21.42	27.63	46.42	31.18	14.58	33.28	36.66	28.59	27.44	34.26	31.46	35.08	39.56	28.73	25.64	20.48	22.93	35.45	34.31	30.36	27.61	34.29	19.27	22.25	37.3	38.93	19.2	28.21	57.66	22.77	8.8	35.76	27.07	26.47	36.02	51.81	26.58	40.24	12.63	28.81	40.01	52.34	28.66
100462977	MTRNR2L1	0	1.87	0	0	0	0	0.78	0.69	0.53	0.87	0.45	0.15	1.7	0.46	0	0	0.59	0	0	0	0	0.59	0	0.67	0	0	0	0	0.76	0.7	0	0	0	0	0.78	0	1.41	0.8	0.46	0	0	0	0.72	0	0.43	1.11	0.61	0.55
53834	FGFRL1	14.49	17.35	10.05	26.02	9.93	21.76	28.02	20.44	23.04	19.68	8.49	16.85	26.11	28.91	20.57	22.03	18.83	19.07	21.47	20.11	10.11	15.59	19.35	20.96	20.74	21.4	28.56	14.67	5.64	18.61	14.27	5.83	14.52	40.86	7.82	21.5	9.4	28.18	15.49	14.26	28.4	16.14	24.58	23.71	17.34	10.41	23.94	10.8
391104	VHLL	0	0	0	0	0	0	0	0	0	0	0	0	0	0.63	1.71	0	0	0	0	0.67	0	0	0	0	0.68	0	1.83	1.76	0	0	3.85	0	0.76	0.97	0.74	0	0	0	0	0	0	0	0.68	0	0	1.88	0	0.74
2766	GMPR	7.85	3.1	5.71	6.82	3.67	8	13.42	3.32	8.16	7.45	1.96	9.57	9.26	8.45	25.71	7.17	9.6	8.33	13.42	9.89	1.48	4.58	11.16	6.48	22.94	6	20.36	1.53	2.22	8.16	7.95	0.83	11.84	13.13	2.26	3.35	5.53	0.73	6.63	10.04	19.45	9.44	10.4	0.64	20.12	12.26	14.67	2.57
11120	BTN2A1	24.11	24.54	25.22	26.96	23.36	32.7	23.69	23.12	29.12	20.27	19.5	25.12	29.28	17.3	28.3	20.91	26.19	30.8	35.91	35.63	29.67	29.62	32.46	30.25	35.27	36.17	34.61	21.05	18.72	35.9	53.35	24.53	23.98	40.09	19.14	20.13	26.95	23.92	34.12	27.13	33.05	30.01	24.58	23.38	32.89	27.73	33.34	19.88
51339	DACT1	10.08	9.81	7.22	41.72	3.24	21	17.44	10.23	7.35	5.35	2.4	12.5	16.08	26.78	8.29	36.95	4.83	19.3	15.7	25.4	1.71	12.2	10.03	18.69	11.85	11.42	9.56	4.01	0.98	16.3	2.1	1.92	11.81	4.92	8.72	13.09	10.38	12.1	12.13	23.73	6.88	16.19	6.31	11.89	18.5	4.73	28.05	2.6
23528	ZNF281	10.01	13.46	6.59	31.84	8.42	22.64	11.24	21.13	18.41	19.2	9.23	18.37	17.31	32.14	10.51	17.29	18.6	21.76	14.82	21.79	11.43	15.02	12.69	15.2	13.54	18.07	13.24	12.39	4.62	14.04	22.34	13.94	13.85	19.52	14.51	21.07	7.39	17.24	18.7	22.83	10.94	25.22	6.04	16.73	10.94	24.82	19.95	13.35
10205	MPZL2	122.27	122.76	177.13	40.84	223.09	82.59	11.21	82.52	72.94	86.06	170.71	44.67	32.4	60.81	97.53	63.94	57.33	35.75	4.12	24.48	141.82	109.55	8.35	17.62	18.36	56.8	11.05	48.05	165.45	13.67	2.94	41.38	59.56	16.15	124.61	74.71	198.29	40.09	13.18	21.22	29.2	15.03	187.32	52.06	31.28	53.67	6.83	191.05
84872	ZC3H10	21.9	24.81	18.6	27.97	15.25	26.04	17.93	21.75	26.6	19.05	26.16	34.09	31.34	16.84	31.08	26.64	34.39	26.81	20.12	20.58	32	31.04	36.86	35.43	20.5	38.34	38.12	34.86	24.54	36.94	41.03	20.45	23.43	30.02	25.48	21.8	32.22	31.46	19.63	31.61	42.33	20.84	25.87	14.65	20.84	39.41	43.26	24.75
387911	C1QTNF9B	2.36	2.34	2.11	0	1.91	0.49	1.1	0	5.4	14.1	2.76	1.18	1.71	0.67	1.24	0	2.53	1.46	2.2	1.36	0	0	0.66	1.67	1.92	0.61	0.77	0.93	2.5	0.78	0	18.62	0.61	0.61	2.6	0	0.68	1.5	1.31	0.81	1.86	1.22	4.18	0	0.94	2.69	2.33	0
23621	BACE1	37.18	29.39	29.58	45.85	29.21	49.47	46.65	30.8	36.24	38.69	27.11	38.75	43.08	31.55	34.73	36.59	28.35	37.2	51.64	46.65	20.12	48.54	49.24	43.85	49.24	20.96	44.5	31.83	25.16	46.79	17.41	12.98	35.82	22.44	24.87	31.51	27.37	25.16	47.26	42.82	31.34	44.39	20.2	16.24	30.33	33.15	52.12	21.78
26128	KIFBP	19.41	12.72	13.65	21.46	13.44	15.9	27.01	27.77	15.93	28.14	17.45	22.35	24.17	16.38	20.35	17.37	15.14	20.27	26.95	19.67	11.07	20.74	20.29	18.59	27.55	11.58	26.53	11.27	13.44	28.46	11.1	32.42	21.98	19.24	16.21	22.16	20.42	14.51	26.93	21.82	18.99	25.22	14.18	12.02	18.52	11.83	28.25	13.87
100505989	SMIM31	31.89	44.57	27.43	46.69	26.75	46.31	29.92	30.77	36.43	36.18	49.79	63.12	56.09	27.24	53.82	48.93	70.36	54.44	29.19	29.54	58.37	62.77	52.95	60.78	27.01	74.97	49.28	60.69	52.18	59.59	77.07	34.83	32.65	65.39	47.54	47.67	60.99	61.58	23.53	48.61	68.6	32.11	41.26	36.81	31.95	72.82	56.94	39.15
80790	CMIP	90.57	141.75	87.62	118.54	85.36	93.47	47.22	169.15	220.48	329.76	123.87	98.03	89.44	225.94	81.18	185.91	125.91	140.34	38.72	108.09	174.44	94.41	34.12	99.47	61.38	132.25	55.2	111.81	82.95	38.82	79.11	84.37	52.13	116.19	117.88	142	107.22	227.03	47.64	78.69	81.36	76.46	81.82	153.56	72.86	87.22	53.7	133.17
8427	ZNF282	33.74	54.75	31.49	40.57	35.06	42.15	27.41	30.18	40.81	51.63	41.67	38.11	23.8	39.73	27.37	42.59	36.29	39.73	41.65	46.55	43.83	43.77	31.73	28.64	35.65	30.99	32.24	44.47	31.25	33.12	23.18	29.76	23.25	46.67	28.92	36.16	28.37	50.87	30.55	29.87	38.17	26.43	34.57	39.08	21.69	57.3	30.62	29.96
10367	MICU1	38.11	27.61	37.29	40.86	27.99	43.58	47.73	50.8	48.66	57.96	29.85	42.96	46.68	37.6	38.62	38.01	34.4	36.07	44.56	48.53	28.82	38.73	43.61	47.88	52.42	28.19	38.57	23.49	23.97	65.08	34.93	47.19	35.45	44.75	41.05	30.98	26.46	29.8	48.9	46.27	34.09	43.79	24.82	24.73	35.15	19.17	56.27	21.93
22993	HMGXB3	20.89	32.98	25.12	55.29	20.85	53.39	23.13	24.94	35.38	35.17	28.05	33.29	26.16	36.56	26.19	43.59	37.28	42.12	23.41	39.28	34.78	33.23	23.01	50.6	28.37	41.42	26.95	34.34	20.8	25.95	42.38	28.12	25.97	38.07	32.73	66.94	40.85	54	24.7	35.5	35.63	30.32	33.63	41.5	36.19	66.49	37.49	33.3
392133	OR10AC1	0	0.46	0	0	0	0.44	0	0	0.43	0	0.44	1.06	1.03	0.36	0.5	0.96	0.56	1.45	0.37	0	0	0.55	0	1.15	0	0	0	0.51	0.42	0	1.12	0	0	0	0.86	0	0	0	0	0	1.08	0	0.4	0	1.17	0.54	0.56	0
4520	MTF1	28.48	36.1	25.14	23.47	37.68	27.97	16.29	25.39	22.51	17.32	44.81	30.31	21.09	19.53	28.88	27.16	38.89	28.88	17.92	22.68	44.23	30.02	21.83	29.27	20.36	35.93	26.17	68.74	32.52	24.22	36.36	53.35	27.64	22.51	36.23	27.56	37.47	21.23	18.15	26.79	33.73	22.5	28.82	25	23.01	46.8	28.94	34.24
6608	SMO	25.06	43.73	15.26	34.33	19.64	27.53	25.23	16.89	21.84	54.06	22.34	29.65	22.7	10	20.18	18.55	18.99	17.39	27.83	29.88	11.78	13.33	25.98	20.48	23.92	18.66	22.74	8.88	22.18	33.57	5.67	24.3	19.85	49.97	20.97	14.47	12.62	46.55	22.06	22.38	24.36	24.84	15.56	6.84	21.79	32.53	25.95	12.38
9476	NAPSA	9.09	26.49	26.07	6.08	9.06	6.69	2.93	8.02	28.76	6.31	12.05	5.34	3.44	5.17	4.16	4.4	20.94	15.76	3.43	33.44	27.62	13.47	3.46	33.75	5.32	5.26	7.12	9.8	10.98	4.1	123.73	8.62	7.34	10.86	3.24	0.47	8.55	2.03	2.57	4.2	3.16	3.29	11.6	6.44	18.22	7.29	3.74	6.45
2516	NR5A1	0	0.17	0	0.33	0	0.16	0	0	0.47	0.14	0	0	0	0.53	0	0	0	0	0	0.14	0	0	0	0	0.29	0.21	0	14.55	0.15	0	0	0	0	0.2	0	0.2	0	0	0.14	0	0	0	0	0	0	0.2	0	0.15
1910	EDNRB	9.85	5.11	12.06	13.12	5.73	10.21	29.75	8.51	9.71	3.21	5.4	29.66	39.1	10.63	14.21	6.59	8.18	8.54	39.24	31.4	4.22	10.21	16.08	32.59	26.62	2.02	35.36	3.99	7.33	28.43	18.58	1.71	26.21	2.66	20.01	2.22	5.57	2.79	45.3	30.04	10.9	33.66	4.38	2.65	27.3	3.13	27.9	4.17
127255	LRRIQ3	0	0	0	1.74	1.37	0.57	0	0.42	0	0	0.56	0	0	1.65	0.57	0	0.63	0	0.48	0	0.96	0	0	0.66	0.51	0.73	0	0	0	0	0.55	3.77	0	0	0	0.63	0	2.38	0	0	0	0.5	0	0	0	0	0	0
10509	SEMA4B	91.14	256.24	122.7	119.59	191.78	291.92	66.57	169.5	156.61	204.32	165.59	111.27	60.22	191.28	110.31	161.37	96.72	64.25	52.84	67.7	209.68	162.94	73.17	39.89	69.31	229.34	59.64	130.89	179.95	66.86	37.56	96.37	79.9	41.13	117.74	192.08	270.76	210.41	85.37	85.36	115.67	96.93	113.18	105.65	44.29	60.79	95.3	279.29
80318	GKAP1	17.32	12.56	10.73	12.48	9.34	9.56	17.65	10.31	13.2	7.3	10.45	23.02	16.41	4.8	17.05	6.26	13.98	10.93	25.51	16.77	14.9	9.92	36.1	16.31	30.77	8.89	28.53	12.23	11.2	24.87	17.6	6.06	17.26	13.02	15.63	7.51	14.47	6.13	21.65	25.73	21.34	16.88	21.32	7.4	21.03	11.09	24.24	10.68
22847	ZNF507	14.99	16	12.31	10.92	11.58	14.54	11.45	15.16	17.11	16.86	13.91	17.15	11.72	19.52	15.43	8.92	14.29	17.32	16.85	19.21	16.04	18.74	17.66	14.06	15.22	20.7	14.15	19.4	10.52	18.96	17.72	21.49	14.27	16.93	12.64	12.99	12.7	13.15	16.43	14.41	17.72	14.48	13.99	7.82	12.44	24.42	14.84	12.24
4736	RPL10A	1211.43	857.39	1379.01	689.35	1174.45	687.61	907.37	1052.63	1253.96	1338.09	998.36	785.74	842.56	998.56	964.19	608.9	783.51	724.4	990.86	969.29	576.11	900.54	880.28	801.57	801.6	836.8	884.6	852.56	1523.37	1168.18	1232.86	1015.67	971.16	1832.52	871.21	603.47	637.67	726.14	1060.57	753.77	663.96	927.03	820.51	925.7	1082.55	996.12	833.3	872.23
1677	DFFB	59.02	74.87	54.55	78.33	49.44	73.58	45.5	53.93	69.28	64.34	96.16	90.65	75.39	54.58	87.79	84.65	108.7	78.02	51.54	54.08	101.98	98.08	81.89	108.86	48.84	138.13	94.68	105.02	78.94	95.93	130.74	66.12	60.04	108.93	70.63	70	114.03	94.87	46.71	86.19	117.09	51.58	85.78	43.62	66.48	126.72	122.49	77.98
3329	HSPD1	77.42	142.03	67.72	117.84	82.5	132.62	105.27	231.68	187.16	285.96	111.63	117.65	102.24	146.31	67.82	87.91	154.13	300.96	89.56	122.94	95.99	100.13	109.69	64.61	140.2	227.54	114.84	825.53	81.62	125	435.51	486.58	117.74	277.68	142.19	183.27	87.67	267.31	101.47	117.55	132.44	112.48	65.35	132.95	68.98	247.33	76.57	152.4
7104	TM4SF4	0.31	0	0	0.69	0.27	0	0.59	0	0	0.29	0	0.81	0	0	1.13	0	0.84	0	1.41	0.59	0.37	0.42	1.18	0	1.51	0	1.62	0	0.64	0	0	0	2	0	0	0	0	0	0.87	0	0.82	0	3.61	0	0.59	0	0.85	0
441490	FTHL18	0	0	0	1.14	0	0	0	0	0	0	0.55	0	0.65	0.46	0.63	0	0	0	0	0	0.62	0	1.3	0.73	0	0	0	2.57	0	0	0	0	0.55	0	0	0	0	0.61	0	0.7	0	0.5	0	1.08	0.49	0	0	0.54
134860	TAAR9	0	0	0	0	0	0	0	0	0	0	0	0	0	0	0	0	0	0	0	0	0	0	0	0	0	0	0	0	0	0	0	0	0	0	0	0	0	0	0	0	0	0	0	0	0	0	0	0
9720	CCDC144A	42.01	41.96	28.81	39.2	25.32	44.52	20.69	22.83	49.07	41.73	35.27	42.3	47.37	34.92	45.11	38.44	60.99	45.7	25.96	30.58	59.19	76.59	51.82	62.61	37.06	52.16	50.33	50.14	32.67	48.77	69.93	39.01	43.12	89.96	40.21	44.66	50.81	71.44	32.56	52.28	81.92	46.04	40.81	44.8	24.37	51.82	58.83	40.06
441155	LOC441155	0	0	0	0	0.32	0.47	0.24	0.84	0.27	0	0	0.2	0.27	0.42	0	0	0	0	0.16	0	0.29	0	0.11	0	0.6	0	0.29	0.12	0.22	0	0	0	0	0	0	0	0.35	0	0	0.63	0	0.62	0	0.5	0.06	0	0.77	0.01
23087	TRIM35	27.75	57.34	24.27	23.13	27.49	28.16	15.04	19.04	43.55	50.16	33.56	26.33	14.43	21	28.69	26.58	19.73	21.88	21.13	21.5	41.85	18.37	17.32	16.57	13.77	17.8	15.58	78.2	25.95	18.01	23.88	18.2	17.5	28.01	37.72	29.69	23.87	23.44	15.66	16.09	19.82	14.89	20.98	31.7	19.66	22.5	15.47	28.5
9373	PLAA	23.22	34.34	19.26	16.36	21.32	23.65	20.1	17.98	19.33	17.06	23.09	18.11	18.69	16.09	20.5	22.54	16.94	21.47	22.53	23.23	9.95	14.07	19.12	21.71	24.16	25.97	22.22	26.42	16.49	24.67	21.65	40.66	23.85	21.25	20.5	19.18	19.85	20.77	23.31	24.25	22.91	24.35	16.51	24.1	19.94	40.53	22.85	18.35
91862	MARVELD3	61.5	83.31	44.63	71.23	49.31	65.1	38.63	65.96	83.78	79.52	87.69	95.89	68.37	86.77	74.15	79.48	114.33	81.93	43.88	42.8	89.36	90.11	85.86	96.77	38.12	125.48	84.89	111.67	78.01	90.26	103.47	70.74	59.35	99.94	74.25	80.39	96.71	89.11	44.45	66.24	108.09	42.18	68.01	50.51	57.04	123.81	91.53	68.71
283159	OR8D1	0.5	0	0	0	0.87	1.11	0.97	0	0	0	0	0.66	0.64	0	1.24	0	3.47	0	0	0.48	0	0	0	0	0.99	0	0	0	0	0	0	6.42	0.55	0	0	0	2.12	0	0.48	0.7	0	0	0	0	0	0	0.7	0
7690	ZNF131	19.19	25.18	16.16	22.39	20.34	52.79	15.59	29	30.91	34.37	27.5	25.36	21.19	31.88	20.39	21.75	31.07	25.94	21.75	24.41	31.43	26.72	27.06	20.68	20.27	81.73	24.65	30.98	18.23	25.68	30.1	50.46	23.2	27.29	39.82	24.67	22.95	26.89	18.82	24.41	33.7	24.63	20.11	26.4	23.95	45.3	33.39	28.94
9205	ZMYM5	45.45	50.01	41.96	47.25	34.82	44.24	32.82	27.7	41.77	35.56	54.12	58.86	50	30.08	57.05	48.99	62.58	45.7	32.78	37.77	57.38	54.8	51.92	78.7	37.2	67.04	54.29	47.15	56.92	60.7	72.64	49.51	51.03	60.31	53.96	40.02	79.52	55.33	29.25	46.83	66.38	47.31	54.41	35.23	38.97	68.2	66.23	47.49
8537	BCAS1	44.06	44.35	27.43	32.21	34.02	30.64	20.27	55.98	32.42	22.3	49.08	43.72	39.54	21.64	50.96	31.14	43.13	41.97	20.84	22.01	37.01	41.7	39.89	43.71	17.29	42.18	33.92	42.93	37.26	36.5	50.75	41.16	25.99	43.01	31.82	39.95	52.28	38.99	19.58	35.19	47.83	21.35	123.15	21.08	28.2	48.66	39.12	28.8
401190	RGS7BP	9.39	1.6	5.02	1.14	3.49	0.27	5.84	0.37	3.63	0.47	4.73	4.43	5.14	0.11	1.85	0.15	2.32	1.21	5.28	4.2	0.82	2.39	5.17	3.36	5.3	0.95	4.44	0.16	1.96	11.79	1.4	0	3.29	1.88	3.59	1.86	3.31	0.81	4.8	5.58	6.3	6.88	2.07	0.26	10.37	0	3.26	2.14
85453	TSPYL5	16.85	7.09	10.56	13.14	8.96	10.29	26.27	52.27	9.65	2.63	6.31	22.79	25.37	91.96	17.94	12.98	26.61	14.44	32.03	23	10.56	16.32	31.8	17.08	29.3	2.14	30.37	2.03	6.75	29.56	10.43	34.45	17.37	4.08	9.87	2.64	5.66	2.54	33.7	20.7	18.57	24.59	6.81	2.56	19.28	0.41	26.45	4.7
8909	ENDOU	50.91	20.31	49.84	7.67	75.97	0.23	1.59	0.38	0.65	0.19	60.29	4.62	0	0	36.25	3.18	13.33	3.12	1.14	0.79	18.38	0.78	1.32	0.29	2.03	4.09	0.82	1.3	70.41	3.34	2.1	0.38	48.87	1.44	38.85	0.86	156.46	3.73	0.98	1.14	8.31	0.74	44.36	2.19	4.63	4.74	1.71	11.05
5226	PGD	367.02	541.8	359.35	150.85	473.27	60.47	30.51	875.18	89.28	120.6	360.28	179.1	36.52	75.96	222.65	73.09	291.68	147.71	25.71	128.74	89.9	90.06	17.33	47.46	25.86	46.78	28.08	127.36	462.5	25.76	51.74	354.73	108.74	52.34	211.29	83.11	273.9	279.4	29.94	33	47.42	45.38	336.33	80.55	77.28	121.16	26.02	153.78
7033	TFF3	43.39	28.99	40.64	1.48	25.86	0	9.32	8.43	118.47	0.41	2.38	5.79	223.4	1.58	299.62	3.12	109.64	12.1	4.46	6.76	0.54	1.21	6.19	5.65	6.49	3.11	7.53	1.66	2.3	4.74	3.04	1.6	5.25	0	3.28	1.22	1.24	0.53	10.46	8.5	65.29	4.71	64.28	0	44.46	0	3.04	0.47
120775	OR2D3	0	0	0.42	0	0	0.52	0	0	0	0	0	0	0	0.42	0	0.55	1.29	1.12	0	0.45	0	0	0	1.34	0	0	0	0	0	0.63	0	0.43	0	0	0	0	0.66	0	0	0	0	0.46	1.38	0	0	0	0	0
55906	ZC4H2	6.67	5.24	4.16	9.98	4.26	5.29	12.01	2.35	4.58	2.29	7.66	10.28	13.42	2.08	7.65	3.65	5.04	3.84	13.76	9.49	4.54	15.6	12.7	7.18	14.04	0.87	12	1.99	5.15	12.47	8.96	4.31	9.64	17.87	5.58	7.43	3.71	7.96	13.41	9.24	10.33	10.26	6.22	1.41	8.17	2.53	11.31	2.11
493753	COA5	20.47	15.18	15.21	8.38	13.99	15.82	22.02	17.58	14.94	18.46	10.82	18.6	13.73	20.33	15.79	7.6	13.09	12.29	26.54	18.75	6.27	19.76	21.03	10.99	24.75	18.17	26.06	26.55	9.69	23.18	19.87	17.77	21.74	23.69	16.15	11	15.16	5.56	28.58	18.08	17.86	21.25	15.37	9.24	15.33	17.67	22.03	6.54
3516	RBPJ	73.76	59.64	50.17	61.52	46.94	69.86	70.12	48.95	58.77	26.42	46.16	83.34	90.14	46.97	67.45	56.72	54.11	55.37	60.1	93.46	44.71	76.65	61.41	82	82.24	39.18	79.93	39.97	37.58	88.11	62.69	58.59	73.29	65.61	50.3	54.45	60.94	51.4	71.5	75.3	61.08	91.96	34.86	43.55	88.86	37.36	82.81	32.91
373863	DND1	13.96	21.44	19.5	16.41	21.75	17.93	9.64	14.35	21.87	23.48	15.75	12.04	11.65	11.83	17.23	9.48	26.78	22.57	10.29	13.73	24.06	17.68	11.7	16.72	11.53	16.99	16.2	38.93	24.26	11.94	37.13	26.81	11.48	20.38	18.28	20.54	36.16	13.76	7.34	9.87	25.62	13.08	29.73	15.74	21.74	22.37	9.89	23.95
27332	ZNF638	55.76	43.84	41.21	43.65	41.49	44.25	43.38	54.64	66.28	62.8	45.77	51.48	45.54	39.06	50.74	41.93	57.37	46.72	46.62	53.74	64.14	74.93	56.34	61.02	58.75	68.68	52.61	63.58	43.31	60.4	62.13	61.5	67.58	105.46	59.03	51.24	60.2	65.26	54.04	62.52	62.42	49.06	55.03	36.77	53.67	90.68	57.74	63.42
285636	C5orf51	21.18	21.34	16.55	21.57	19.17	49.13	29.05	31.76	21.38	25.71	21.11	26.05	16.61	26.09	22.53	14.94	25.16	28.97	24.01	30.1	20.1	17.79	26.09	15.01	28.63	45.55	23.51	19.73	13.3	27.97	19.32	45.37	22.6	20.38	26.26	15.86	14.83	22.74	24.27	19.94	15.64	33.69	14.73	18.55	15.31	17.94	33.26	20.55
348174	CLEC18A	8.19	8.95	7.48	7.05	6.56	7.18	4.63	3.85	8.27	7.83	9.64	11.47	9.89	9.97	10.7	8.91	13.93	13.2	5.65	5.54	10.19	8.22	9.39	10.75	5.48	10.54	10.77	8.18	11.1	13.03	23.61	6.01	6.95	10.21	7.44	8.55	9.81	10.27	4.85	5.05	16.23	7.8	8.25	2.88	7.06	14	12.27	8.31
5693	PSMB5	60.43	119.23	70.33	84.8	68.04	106.49	68.49	156.31	111.2	154.57	70.04	74.24	76.25	152.05	60.85	85.28	58.01	102.99	79.65	95.71	73.8	84.24	60.88	56.8	69.98	130.24	71.41	103.47	53.78	81.29	40.1	152.83	62.68	112.05	60.67	195.64	43.69	113.86	75.3	81.3	70.7	77.97	62.36	106.27	74.46	107.85	59.61	217.88
7461	CLIP2	29.24	27.73	24.94	54.58	21.73	35.56	35.26	32.68	25.25	24.97	19.73	35.6	31.48	23.55	25.14	39.32	32.61	42.27	39.62	38.5	25.06	26.32	37.43	25.83	32.83	31.04	39.69	30.16	19.22	28.96	28.36	23.93	33.07	31.97	26.01	19.25	22.21	24.6	31.44	29.84	40.21	38.34	25.92	36.1	29.02	22.02	32.31	27.45
728361	OVOL3	3.63	2.26	1.35	2.55	0.57	0.92	0.81	3.24	0.83	0.62	2.15	2.62	0.98	2.26	2.84	3.93	3.28	6.62	0.69	0.71	2.43	0	1.07	0	0	6.04	0.98	7.53	2.78	0	3.48	3.32	0	4.59	2.83	0	2.8	4.79	0.8	0	2.06	0.65	1.65	0	0	3.58	2.75	2.45
28971	AAMDC	26.29	27.49	23.45	28.17	17.43	28.29	59.3	28.32	30.12	38.26	30.71	40.51	42.22	32.61	52.73	34.91	34.39	24.48	29.2	33.68	39.33	50.01	57.4	46.28	42.11	52.73	57.33	28.45	28.96	52.83	47.07	14.72	43.66	33.4	27.45	12.25	32.4	63.93	35.97	34.59	69.14	37.13	30.25	15.49	29.94	29.39	64.32	25.47
340024	SLC6A19	0	0	0	0	0	0	0	0	0	0	0	0	0	0	0.11	0	0	0	0	0	0	0	0	0	0	0	0	0	0	0	0	0	0	0	0	0	0	0	0	0	0	0	0.08	0	0	0	0	0
3416	IDE	22.76	22.78	25.35	24.5	25.01	22.75	22.65	44.54	27.67	26.71	23.11	28.3	22.02	15.87	21.5	22.8	29.69	26.66	24.87	27.43	23.83	26.81	25.38	19.43	29.3	21.75	26.87	25.96	24.45	28.05	18.45	49.25	25.19	23.13	21.88	16.12	22.81	20.63	28.76	26.58	20.56	28.12	20.53	24	17.22	27.51	24.52	27.67
6165	RPL35A	227.48	253.88	271.08	140.48	238.63	304.02	214.13	280.88	418.32	478.72	234.27	198.38	179	504.63	216.95	189.84	193.76	195.4	191.69	290.15	205.19	478.19	164.7	149.65	180.48	304.52	191.71	187.64	258.33	226.14	261.81	386.14	209.7	542.26	140.29	190.16	74.95	135.96	215.36	122.57	125.22	197.55	154.77	405.9	324.97	246.51	157.89	282.83
54108	CHRAC1	29.66	43.04	22.47	29.25	23.93	55.51	40.44	79.99	42.57	49.79	33	32.51	32.7	57.02	31.7	28.37	29.21	34.04	36.39	39.96	32.22	52.84	34.18	30.2	38.84	35.54	30.31	47.67	18.89	33.19	26.35	34.32	31.36	55.28	32.71	32.19	23.8	40.1	29.72	24.63	33.26	32.49	19.04	22.68	21.96	57.64	28.74	32.78
59343	SENP2	32.08	36.84	26.85	34.62	31.35	55.68	25.23	44.2	46.77	54.15	37.88	51.41	39.27	59.41	42.51	38.45	48.47	44.52	28.61	38.66	57.12	48.75	46.22	48.43	29.8	63.47	45.72	49.09	37.84	36.96	53.01	51.26	33.3	75.44	36.06	52.52	39.21	43.09	28.31	38.84	46.32	29.66	36.49	39.38	29.63	54.4	48.28	41.19
344892	RTP2	0	0	0	0	0	0.37	0	0.31	0	0	0.37	0	0	0	0	0	0	0	0	0	0	0.42	0	0	0	0	0	0	0	0	0.47	0	0	0	0	0	0	0.41	0	0.47	0	0	0	0	0	0	0	0
157922	CAMSAP1	35.3	43.15	43.33	31.39	46.8	32.69	26.82	48.95	40.31	47.7	38.22	26.41	20.3	38.35	39.38	32.17	21.17	20.13	35.8	29.39	54.76	54.15	26.89	20.24	26.04	30.05	30.19	26.26	45.64	25.79	21.44	39.56	34.88	33.62	43	32.96	57.06	50.08	29.06	26.44	32.65	28.34	39.6	28.69	18.19	40.37	20.98	35.54
64579	NDST4	0.17	0	0.08	0	0	0	0.34	0	0	0	0	0	0	0	0.19	0.1	0	0	0	0	0	0	0.29	0	0.08	0	0.1	0	0.09	0	0	0	0	0.12	0	0	0	0	0.14	0	0.1	0	0.43	0	0	0	0	0.15
170062	FAM47B	0	0	0	0	0	0	0	0	0	0	0	0	0	0	0	0	0	0	0	0	0	0	0	0	0	0	0	0	0	0	0	0	0	0	0	0	0	0	0	0	0	0	0	0	0	0	0	0
143379	C10orf82	2.28	0	0.43	1.71	0.83	0.9	10.57	0.44	2.13	3	1.04	3.32	3.85	1.35	4.69	1.29	2.26	0	8.19	2.28	0.59	2.25	12.44	1.38	6.36	0	5.22	0.48	0.51	2.76	0	0	6.74	30.21	0.51	0	3.09	0	4.15	1.33	3.73	6.58	1.21	3.06	1.44	0	1.05	0.43
8604	SLC25A12	27.61	24.84	22.41	20.83	19.16	19.67	54.87	21.77	25.71	29.36	23.35	39.5	41.71	12.09	35.22	16.6	24.6	21.04	57.81	40.41	21.54	31.76	47.92	20.04	44.18	22.21	50.11	35.4	22.74	63.42	18.69	23.61	44.11	51.66	28.09	11.53	21.1	31.7	57.12	43.77	41.38	42.22	14.69	13.92	27.84	25.3	43.58	23.24
2784	GNB3	2.62	5.19	2.47	4.65	3.1	5.02	1.59	5.63	8.03	7.67	5.7	6.16	3.59	5.62	7.33	7.39	2.18	6.03	2.41	4.9	3.48	3.78	9.48	7.76	4.46	7.31	8.11	6.25	2.71	9.18	5.71	10.43	3.38	21.66	3.01	1.9	5.33	3.57	2.15	4.65	8.32	3.22	4.86	1.75	3.82	9.52	12	4.54
100463285	MTRNR2L4	38.41	58.88	43.4	58.61	38.72	56.87	29.71	35.98	57.58	47.5	65.78	61.97	62.19	39.21	58.03	61	75.09	55.62	31.78	39.76	78.35	69.4	67.03	81.17	38.58	101.63	72.83	77.46	58.13	71.93	90.89	55.07	41.99	77.08	56.4	64.76	80.64	86.45	32.73	56.8	107.53	42.33	60.75	39.51	41.68	97.98	68.93	57.81
153129	SLC38A9	12.9	13.35	11.43	8.92	11.02	15.59	7.71	9.99	11.09	11.49	8.81	10.85	9.08	17.08	11.92	8.78	14.48	14.14	8.05	16.76	19.6	18.2	9.42	14.93	11.59	9.11	13.64	15.19	11.59	14.13	18.86	18	9.92	17.96	12.62	8.66	12.68	9.34	10.05	10.68	11.59	11.93	10.48	14.69	15.37	17.97	15.44	23.01
795	S100G	2.01	2.47	0.45	1.7	0.94	0	0	2.98	2.17	0	1.18	1.99	0	0	0	1.79	1.5	2.41	1.86	0	1.84	1.5	0.64	2.88	0.5	0.71	0.66	2.75	2.28	1.47	7.52	0.92	1.18	3.04	1.16	0	0.71	1.21	0	0.7	0	0	2.47	0	0.97	2.04	4.52	0
140459	ASB6	44.09	54.34	38.03	61.58	39.88	69.98	36.3	56.28	52.74	64.58	57.71	61.7	52.72	55.2	52.9	61.06	69.09	60.5	41.84	50.87	78.89	75.45	53.53	62.37	38.4	99.28	56.22	67.59	46.08	58.49	75.25	46.94	44.83	66.89	62.17	46.27	68.76	78.81	33.86	58.91	76.58	38.97	57.76	50.83	50.93	77.08	64.89	63.01
4144	MAT2A	167.88	145.89	135.82	157.59	178.37	163.7	385.45	179.72	234.34	229.09	235.16	251	443.37	140.32	198.72	143.07	257.97	143.05	184.31	178.19	172.18	241.17	275.18	392.05	256.93	203.11	244.5	211.79	133.18	220.29	158.42	154.11	378.16	286.34	271.72	143.84	284.73	135.81	225.25	291.89	275.28	326.79	140.81	100.41	284.54	482.86	237.68	216.25
9166	EBAG9	10.91	17.76	10.38	6.96	12.91	21.87	13.53	31.36	21.61	23.61	10.91	16.21	11.44	27.07	15.25	9.62	16.74	13.25	12.1	12.75	15.3	17.06	7.88	8.08	18.73	17.46	12.33	30.55	11.68	16.63	19.56	16.35	13.4	15.53	16.56	12.59	7.48	13.33	13.04	10.2	10.72	10.79	11.18	7.3	10.43	27.02	12.6	14.94
90871	DMAC1	16.09	34.26	18.62	14.66	17.77	26.02	28.15	19.63	11.85	14.92	15.07	14.5	21.26	14.58	16.48	16.94	15.46	11.2	30.66	20.83	9.41	12.62	24.9	9.94	24.42	16.7	24.98	17.11	14.23	23.98	13.95	37.61	22.91	11.04	12.52	10.2	9.79	15.87	33.16	25.59	16.42	26.32	12.97	15.53	25.81	11.89	18.8	16.16
4763	NF1	41.04	43.88	29.63	50.83	28.45	46.54	35.13	64.43	49.61	43.71	30.7	46.32	43.15	45.34	43.23	39.11	47.44	37.23	37.94	50.55	28.63	36.25	46.93	47.21	47.36	64.08	47.09	33.21	28.85	52.65	33.61	57.47	47.81	76.86	39.03	37.66	37.14	47.47	46.37	40.38	43.17	44.46	24.25	28.54	35.2	80.71	46.18	38.59
148213	ZNF681	9.14	12.36	9.16	11.55	6.99	11.72	5.99	12.89	10.27	6.59	13.34	13.99	11.98	7.14	12.24	11.95	15.36	11.79	5.54	9.83	17.06	13.83	12.98	14.38	6.69	16.85	13.34	16.88	11.05	10.55	21.26	11.64	7.63	20.11	11.48	9.61	14.63	17.23	4.72	10.73	15.26	5.95	14.09	5.94	8.1	15.24	15.31	11.05
387597	ILDR2	2.69	3.04	1.61	3.95	2.47	1.86	7.15	2.74	1.8	1.62	1.89	5.4	4.5	3.87	5.71	3.18	3.12	3.67	6.72	3.21	2.54	5.6	8.25	2.36	4.59	2.21	9.63	3.61	2.34	10.31	3.8	3.21	5.66	18.2	3.72	3.01	8.94	4.55	8.03	7.47	11.29	7.71	3.92	2.33	3.65	4.73	13.04	4.18
11055	ZPBP	0	0	0	0	0	0	0	0.32	0	0	0	0	0.58	0	0	0	0	0	0	0	0	0.69	0	0	0	0	0	0	0	0	0	0	0	0.95	0	0	0.64	0	0	0	0	0	0	0	0	0	0.59	0
643	CXCR5	20.96	36.79	33.67	24.38	21.97	25.43	22.77	27.57	33.1	25.28	25.99	24.68	17.5	23.04	22.03	18.86	33.68	25.16	22.87	40.32	37.85	30.34	20.73	40.86	22.53	18.86	20.11	17.33	21.61	19.92	114.26	10.24	16.5	20.09	14.2	25.61	15.51	10.27	19.32	17.83	21.68	16.63	16.62	14.55	24.16	7.59	26.44	13.25
23625	FAM89B	93.71	98.46	92.73	115.1	83.75	103.6	143.73	222.43	74.59	85.29	90.14	109.51	88.89	132.51	118.72	138.19	84.39	142.61	152.03	139.82	95.71	123.09	131.3	114.58	145.5	137.41	124.9	95.16	63.95	109.84	80.85	91.45	96.87	97.14	87.74	70.46	59.08	150.68	115.62	131.88	102.75	137.44	83.73	83.29	93.67	40.67	126.25	91.54
4522	MTHFD1	36.31	69.88	35.25	48.38	37.04	46.5	37.71	42.88	80.22	74.14	52.29	35.42	31.96	63.25	39.91	44.82	50.19	52.44	35.54	43.75	53.54	46.75	33.24	25.38	35.14	78.75	30.76	77.17	43.25	41.42	48.19	74.4	38.16	94.7	43.68	59.98	38.78	73.82	31.01	30.46	34.46	34.79	23.18	62.69	28.5	64.55	33.28	45.29
9117	SEC22C	41.77	36.93	28.46	37.39	24.61	35.33	36.15	21.55	37.47	36.41	30.05	51.7	38.78	29.73	47.3	27.74	38.5	41.08	45.15	41.21	33.12	36.27	38.27	45.44	37.3	37	48.96	42.51	30.68	45.37	55.88	21.19	39.75	45.56	29.2	30.46	33.93	26.86	45.97	39.28	46.14	40.67	32.05	31.34	57.13	54.14	47.27	26.34
105369914	LOC105369914	5.52	9.62	5.04	8.91	5.03	2.98	2.71	6.78	6.59	6.95	6.02	9.5	4.76	11.59	8.75	12.82	8.91	8.14	6.19	4.57	11.51	11.28	6.87	8.04	3.24	13.42	10.19	14.29	7.28	8.81	15.39	4.72	4.62	2.98	9.46	16.17	10.81	14.55	1.74	6.84	8.64	4.63	8.29	4.8	14.72	23.18	8.9	12.57
54921	CHTF8	37.49	31.96	39.37	35.28	24.56	17.21	40.89	59.32	70.93	49	41.44	25.3	0	78.71	26.98	22.26	21.59	44.99	66.52	59.2	32.81	37.12	32.08	35.78	37	0	63.62	43.4	52.17	25.89	31.37	30.71	30.43	30.54	31.03	41.18	7.39	45.74	66.45	4.04	29.35	35.3	35.86	39.82	22.26	33.37	51.57	16.62
54145	H2BS1	0	0	3.63	5.87	0	0	0	0	0	0	0	0	0	2.86	0	0	0	0	9.92	0	0	0	0	0	0	0	0	0	3.29	0	0	0	0	0	0	16.5	0	0	0	0	0	0	0	0	0	0	0	0
63926	ANKEF1	4.06	8.21	2.78	2.79	4.95	7.47	0.4	17.74	7.18	11.05	6.12	2.58	2.84	17.35	3.3	3.94	5.39	4.44	1.48	3.02	6.82	5.32	0.87	2.1	0.91	9.19	2.49	14.13	5.53	2.4	3.44	14.13	1.49	8.83	3.98	4.26	3.25	9.87	1.25	1.64	4.24	1.87	4.64	4.47	1.68	2.12	1.39	15.97
319101	KRT73	0	0.23	0.53	0	0.17	0.44	0.07	0	2.31	0	0.21	0	0	0.07	0	0	0.1	0.47	0.07	0	0	0	0	0.43	0	0	0	0	0.41	0	1.18	0.07	0	0.11	0	0	0	0	0.07	0	0	0	0.07	0.42	0.19	0	0.27	0
83698	CALN1	7.25	7.11	5.91	9.13	6.03	8.42	6.27	6.16	8.26	7.45	9.7	11.54	9.32	7.07	7.63	11.33	12.98	10.03	5.11	7.55	12	10.81	9.59	11.94	5.07	16.79	10.78	12.82	9.57	12.24	15.35	7.19	7.23	21.85	8.01	9.15	11.53	9.83	6.25	8.96	13.11	7.01	9.26	7.33	7.08	14.04	11.34	8.2
646862	RNF225	27.62	21.35	49.73	8.46	47.51	3.1	0	0.86	4.05	4.38	43.65	8.66	1.79	4.22	15.02	30.02	6.47	9.55	0	0.45	11.46	1.29	1.8	0	0.92	9.97	0.62	28.43	30.02	0	3.25	18.82	33.65	4.6	33.53	14.93	44.22	11.87	0	1.3	4.4	0.91	24.88	7.96	0.45	1.9	0	11.46
4092	SMAD7	38.25	25.75	25.08	53.87	20.55	51.39	32.38	20.32	17.87	13.59	19.75	29.78	36.74	37.81	21.58	35.62	24.23	38.11	35.77	37.97	24.33	31.32	27.78	40.54	27.3	41.5	39.8	34.29	11.77	26.02	24.59	11.42	29.32	39.32	26.91	39.63	14.53	20	27.49	43.25	38.09	37.56	24	33.38	46.67	11.04	27.33	23.26
57534	MIB1	46.05	54.93	49.04	68.92	45.79	57.6	59.1	86.95	44.81	50.39	44.5	62.36	59.9	72.01	57.44	54.54	74.07	53.35	66.66	58.91	49.36	59.15	55.31	51.46	54	74.5	60.89	59.22	44.28	69.15	47.24	70.53	62.4	62.06	59.25	50.63	53.33	67	70.83	72.93	54.49	58.69	56.28	46.46	55.81	43.83	56.05	54.87
79710	MORC4	16.18	18.84	11.06	18.27	12.56	14.63	9.75	67.49	19.82	23.07	16.27	16.54	17.46	14.19	13.41	11.56	25.46	13.99	11.34	12.62	18.45	21.96	13.27	26.08	10.85	29.66	16.06	17.78	12.77	10.87	5.37	23.02	15.13	14.89	14.06	18.27	14.39	15.54	11.38	17.32	18.27	15.93	11.61	15.55	18.45	20.37	12.15	12
148932	MOB3C	30.22	50.95	23.46	27.98	28.02	37.41	38.63	46.04	36.65	30.4	27.39	37.08	37.17	21.21	32.16	25.26	32.22	32.22	36.93	36.82	44.37	43.88	32.64	39.37	47.28	51.07	41.67	63.92	20	32.86	23.5	79.86	40.43	18.16	33.8	27.97	25.93	47.09	38.02	35.44	41.63	57.33	25.65	26.49	49.04	51.65	34.76	30.97
79018	GID4	30.18	22.2	27.91	20.42	19.98	20.87	38.45	29.85	13.8	24.75	18.64	22.11	26.08	13.15	27.31	20.28	19.16	19.1	63.46	23.31	14.24	14.84	37.02	15.12	37.99	23.97	35.85	13.93	22.86	43.94	17.49	11.84	28.48	21.27	19.31	31.21	21.65	15.65	34.46	36.28	32.17	31.6	18.12	18.43	13.6	23.57	31.65	20.52
1299	COL9A3	8.54	4.26	4.83	6.86	2.65	2.38	21.05	4.08	3.31	1.85	2.54	12.77	8.5	5.27	12.43	4.06	6.79	6.56	20.66	11.92	2.64	4.96	23.18	8.35	24.34	35.24	16.89	3.37	4.09	12.41	4.2	4.28	15.68	145.88	4.04	1.5	5.61	6.06	12.12	11.05	22.13	13.69	5.52	3.82	13.98	2.33	6.74	7.08
138151	NACC2	46.4	17.51	39.35	72.47	36.59	43.98	149.08	28.9	29.18	35.27	30.91	108.41	116.66	34.64	71.05	29.69	27.18	27.77	169.04	95.75	25.8	48.01	154.74	32.2	137.46	18.25	132.43	8.6	20.2	149.08	17.2	20.43	80.67	8.99	56.25	24.12	47.26	23.04	185.14	156.05	97.34	141.9	19.74	9.69	47.8	11.31	159.73	33.51
388533	KRTDAP	31.56	148.65	9.47	35.62	5.7	8.71	0	0	24	6.16	60.75	119.35	0	5.93	4.33	1231.43	30.68	329.13	1.08	6.34	298.78	38.08	0	0	0	14.94	1.74	232.07	4.15	0	0	119.56	7.63	11.06	1.41	582.81	5.56	118.21	0	3.24	1.76	0	5.18	1103.63	0	1.78	1.83	220.22
9245	GCNT3	36.07	38.73	26.73	35.46	30.81	34.41	19.74	22.81	46.05	33.98	52	40.12	39.49	21.44	46.88	36.53	51.83	40.06	20.25	21.7	48.07	51.09	38.45	49.4	19.36	56.13	42.22	46.39	42.18	42.03	54.83	30.98	28.34	47.2	39.95	41.9	56.58	36.1	18.51	30.09	54	22.56	47.18	19.25	31.02	56.6	47.98	38.83
9507	ADAMTS4	70.33	41.47	70.6	138.52	36.94	83.25	268.83	31.66	120.45	55.99	47.06	122.32	432.32	41.73	89.78	106.88	108.09	97.05	78.22	110.77	53.74	108.25	130.51	310.25	144.02	64.78	243.5	69.19	46.15	71.39	71.8	29.72	192.37	71.53	183.26	57.57	128.17	63.29	143.91	193.16	174.32	191.88	43.76	81.5	244.6	63.56	151.04	58.94
81559	TRIM11	26.71	45.87	28.29	34.82	26.22	24.49	12.44	53.91	55.42	62.61	32.69	25.42	15.3	55.18	27.87	28.52	30.92	31.6	22.18	29.83	46.39	26.54	16.39	25.3	20.16	37.2	17.92	33.29	20.85	18.32	35.28	59.56	22.72	40.49	18.97	22.05	26.86	44.8	17.62	20.64	24.65	18.27	31.51	32.12	29.59	50.23	22.63	41.59
388611	CD164L2	10.92	1.68	14.29	0.73	10.58	5.67	0	0.59	0.69	2.41	7.64	0	0	2.32	4.54	0	3.55	1.1	0.59	0	12.58	1.77	0	0	0	1.39	0	15.53	20.42	0	2.55	3.52	6.29	0.9	4.81	0.89	23.54	3.88	0	0	9.48	0	16.43	1.36	1.86	1.24	0	2.05
84277	DNAJC30	23.49	44.88	25.55	21.13	20.71	36.77	26.18	36.85	27.9	38.94	30.47	35.28	26.12	23.58	30.47	21.89	38.41	41.47	30.53	25.03	32.54	28.56	27.48	27.43	27.94	26.33	28.26	25.26	24.08	33.92	30.7	31.11	22.31	32.98	21.59	18.91	22.78	35.16	24.7	22.84	27.48	25.49	26.96	17.9	24.47	31.46	29.09	26.79
29888	STRN4	81.45	105.56	83.54	88.6	82.05	99.94	93.73	76.4	90.43	101.05	92.79	96.92	96.46	139.6	79.71	94.12	82.37	107.73	79.26	93.96	72.99	66.29	88.53	78.53	92.2	70.66	104.93	101.92	91.43	95.33	75.79	97.28	66.52	105.86	94.16	146.66	86.72	94.55	95.9	117.03	101	96.44	91.72	71.36	90.72	124.22	113.22	83.15
26496	OR10A3	0	0	0	0	0	0	0	0	0	0	0.53	0.65	0	0	0	0	0	0	0	0	0	0	0	0	0	0	0	0	0	0	0	0	0	1.59	0	0.68	0	0	0	0	0	0	0	0	0	0	0	0
440957	SMIM4	10.24	11.03	13.6	6.31	7.34	11.31	10.8	10.24	7.05	6.98	10.1	6.15	7.14	10.09	13.79	7.94	6.43	14.53	15.59	11.67	3.42	7.71	14.35	14.66	13.79	7.93	12.31	5.89	12.01	18.98	10.33	3.4	14.32	6.53	4.98	3.87	3.94	10.12	8.89	15.48	15	12.74	6.71	5.94	6.3	20.53	6.46	8.92
995	CDC25C	2.68	5.16	1.05	4.11	2.32	12.39	0	8.84	11.13	20.24	1.71	0.85	1.12	5.29	1.2	4.46	4.39	4.16	0.41	4.28	5.31	2.65	0	1.61	0.43	6.16	0	7.46	2.43	0.38	2	12.06	0.53	14.75	3.12	7.98	2.54	4.72	0.28	0.67	0	0.47	1.73	6.19	0.42	9.57	0.4	5.2
9271	PIWIL1	13.34	21.54	11	19.97	10.03	18.33	13.38	11.11	17.37	17.02	22.02	22.99	21.18	11.55	19.27	24.08	32.21	24.93	12.74	12.65	24.44	22.78	22.63	27.73	12.35	33.32	24.39	45.7	22.99	26.73	36.18	16.02	13.68	30.36	21.98	19.78	23.91	24.97	12.44	25.83	31.3	11.59	24.35	17.51	18.1	34.71	29.25	18.23
7275	TUB	12.72	3.87	8.58	13.92	5.68	4.1	16.84	7.78	7.74	4.19	5.38	11.74	12.58	2.8	13.81	5.88	9.17	4.79	16.31	11.15	3.46	7.88	22.68	9.41	15.59	8.15	22.43	1.66	7.82	19.85	10.21	5.94	15.38	18.35	3.98	3.91	9.87	3.66	10.89	8.21	21.67	9.53	6.78	0.59	7.58	3.26	17.92	3.76
23135	KDM6B	58.08	77.28	47.09	69.83	52.56	55.11	106.25	54.72	86.62	75.59	45.51	78.07	145.83	65.35	48.79	64.57	101.1	81.26	61.21	66.56	59.14	55.07	82.4	179.84	82.31	133.11	84.12	71.73	36.95	38.71	72.2	66.38	84.87	102.62	121.62	72.09	69.46	107.19	65.35	141.31	133.7	91.94	52.32	70.23	85.49	138	109.06	108.25
2070	EYA4	4.32	3.45	0.87	2.79	1.08	5.17	2.07	0.15	7.93	19.47	0.61	3.61	1.97	4.64	4.51	1.47	4.06	0.85	3.12	2.22	0.4	3.91	2.92	1.93	1.57	0.35	2.57	0.35	0.43	2.88	0.99	1.67	1.83	0.35	0.52	0.11	1.37	4.03	1.36	2.83	3.18	3.37	0.59	0.18	2.31	0.33	1.73	5.52
100129583	FAM47E	1.46	0.8	0.99	0.8	0.32	0.63	0.87	1.74	0.76	1.08	0.62	0.81	2.31	0.76	3.98	0.33	0.96	0.41	4.42	1.08	0.74	1.71	3.28	0	1.97	0.49	2.4	0.38	1.17	3.08	1.55	0.86	3.95	1.42	1.01	0.68	0.79	0	1.24	0	4.37	2.87	1.15	0	1.72	0.38	2.24	1.08
101929372	LOC101929372	30.65	43.24	25.22	38.1	24.62	41.76	30.38	18.89	34.18	31.82	43.6	55.26	41.65	31.29	42.94	45.64	55.12	43.8	24.14	27.49	52.09	50.95	52.87	59.49	27.52	65.64	63.67	57.21	45.24	48.08	78.52	33.83	31.85	51.32	39.27	48.21	51.24	45.54	22.46	44.86	55.14	32	47.24	38.07	44.92	69.75	64.18	35.73
84332	DYDC2	3.57	4.18	4.82	0.55	3.23	3.68	2.57	2.39	4.5	5.08	6.49	7.81	4	3.98	8.44	3.89	5.34	2.14	1.69	2.42	6.16	6.15	4.36	3.08	1.8	3.34	6.21	6.1	10.63	6.34	3.62	3.82	1.99	7.46	5.48	3.24	8.64	4.38	1.99	2.3	4.08	2.33	2.06	3.33	2.74	7.23	2.48	4.43
148545	NBPF4	0.14	0.3	0	0	0	0	0	0.14	0	0	0	0	0	1.25	0	0	0.5	0.21	0.12	0.12	0	0	0	0	0	1.84	0	0	0	0	0.19	1.07	0	0.26	0.21	0	0	0	0	0	0	0	0.49	0	0	0	0	0
51057	WDPCP	72.41	94.69	55.38	84.54	52.74	88.08	57.29	56.26	86.76	81.29	95.67	112.86	104.6	66.98	93.32	85.06	132.71	98.28	54.71	60.97	104.96	120.76	99.58	108.45	54.36	133.08	113.77	142.45	82.6	111.08	141.91	81.46	71.8	168.22	77.56	80.24	105.29	104.39	55.05	87.7	114.03	71.94	72.28	54.2	63.01	140.64	137.32	81.03
50846	DHH	4.3	3.3	2.81	3.67	1.79	2.97	5.8	3.85	5.19	3.25	4.24	4.86	4.67	1.5	4.35	4.42	4.97	4.51	4.11	4.47	2.45	5.7	6.09	7.51	2.56	4.21	5.43	2.61	4.19	5.18	7.18	2.21	3.66	3.7	3.81	2.42	4.64	2.71	3.61	4.31	4.17	4.55	2.09	2.51	5.88	2.44	4.53	3.33
150280	HORMAD2	0	0	0	0	0	0	1.09	0	0	0	0	0	0	0	0	0.38	0	0	0	0	0	0	0.73	0	1.35	0	0	0	0	0	0	0.52	0	0.79	0.6	0	0	0	0	0.78	0	0	0	0	0	0	0	0
6792	CDKL5	15.7	10.76	14.17	18.35	12.82	12.04	8.1	12.06	9.52	8.22	12.64	14.4	12.13	10.2	16.25	17.5	13.54	12.27	10.84	9.49	11.7	14.4	13.21	15.75	10.29	19.71	13.98	16.48	15.64	14.84	12.9	10.82	16.05	13.93	16.73	15.72	18.25	13.94	11.57	11.49	13.81	8.62	10.57	10.97	9.31	28.41	14.87	10.16
27185	DISC1	26.95	40.75	24.57	39.32	16.32	28.3	20.45	20.36	31.96	16.09	22.86	36.27	45.39	13.76	29.05	26	39.79	29.67	23.62	32.85	23.83	31.24	31.37	47.74	33.48	49.93	35.69	102.82	27.84	30.1	42.24	17.87	27.25	34.39	24.38	12.79	34.74	27.15	17.94	40.46	29.11	29.31	26.63	17.15	36.5	42.32	40.36	20.38
55536	CDCA7L	15.75	21.87	14.68	24.04	10.46	28.35	22.18	51.29	49.61	60.98	16.92	24.86	18.29	37.16	14.15	13.14	39.99	23.34	40.43	28.02	23.34	24.83	30.24	16.2	23.91	42.58	30.26	41.03	11.46	32.19	35.06	48.94	22.78	54.1	14.14	19.26	11.54	46.3	24.3	26.78	14.41	20.91	15.11	17.33	17.36	28.71	21.65	20.59
55848	PLGRKT	14.65	29.69	14.23	9.81	20.93	29.12	20.22	9.52	15.24	9.74	11.98	17.58	14.13	7.25	15.75	14.14	16.33	13.61	18.87	20.5	15.73	17.6	7.28	7.84	22.55	12.17	13.47	18.54	20.02	14.84	20.45	164.27	16.65	7.29	17.54	16.28	15.12	22.25	24.76	21.7	10.15	17.11	14.42	22.88	15.52	17.27	6.56	14.88
3339	HSPG2	385.79	208.18	336.66	502.23	281.05	411.26	890.5	300.97	253.15	186.52	184.72	411.67	767.97	187.03	431.42	401.05	280.9	341.61	862.42	610.61	179.28	362.79	800.11	566.51	748.31	264.29	680.45	256.53	177.71	588.99	108.59	141.46	497.91	134.16	387.68	171.12	260.41	123.58	851.82	769.35	475.48	448.56	157.18	219.92	433.67	126.88	585.29	140.9
140606	SELENOM	279.98	130.04	223.19	526.7	144.56	232.16	715.52	198.28	199.36	134.96	144.38	634.21	547.87	249.01	394.38	261.17	200.08	318.01	1083.07	667.32	63.53	305.12	817.96	315.77	868.73	133.8	677.23	127.87	92.63	789.34	120.25	70.51	583.1	134.09	300.83	160.95	180.06	81.61	974.47	730.39	498.58	1074.17	130.4	88.5	509.29	48.06	965.95	182.41
55240	STEAP3	14.96	35.8	21.33	14.01	18.68	27.3	7.14	48.68	36.78	51.41	30.66	14.28	10.58	40.15	17.27	25.92	23.73	29.73	4.86	11.67	27.55	28.02	3.28	8.56	7.38	98.26	7.68	58.61	21.82	5.83	5.06	41.38	8.39	29.02	29.73	41.52	18.48	21.47	6.62	7.4	16.98	8.77	23.05	24.54	16.14	36.19	8.88	31.22
79632	FAM184A	3.46	1.35	2.82	5.73	2.06	1.45	9.9	1.98	2.92	0.4	3.28	15.26	13.24	0.69	6.13	1.54	5.37	3.24	11.6	9.47	2.25	6.4	14.69	3.4	13.64	2.91	9	0.83	3.41	16.5	4.64	3.45	12.11	4.86	11.08	0.91	5.79	1.11	21.13	25.43	16.52	22.15	3.29	0.56	7.72	0.73	19.29	6.67
79155	TNIP2	22.29	33.83	29.84	41.88	30.15	47.79	35.91	62.46	32.78	47.35	31.9	51.55	38.56	39.95	29.51	37.23	33.37	33.44	32.68	42.52	25.73	31.06	31.3	32.91	30.6	40.55	26.71	51.2	21.92	44.26	39.16	41.37	27.56	17.62	27.56	40.21	35.69	29.98	33.93	44.95	31.16	59.66	25.83	48.96	41.87	31.02	46.01	31.3
284119	CAVIN1	502.99	260.96	355.01	519.73	266.63	481.31	1371.31	199.63	262.5	214.89	208.55	565.6	891.5	261.3	568.12	446.75	272.39	359.19	1471.98	546.14	173.41	368.21	879.05	464.21	1085.55	183.28	1212.17	220.74	196.39	942.62	68.42	94.37	823.63	125.04	384.27	417.8	224.9	216.57	1068.73	941.11	778.01	846.12	152.18	442.47	583.58	170.7	717.68	264.69
11011	TLK2	59.28	64.85	52.9	69.57	47.98	68.74	53.96	67.09	66.07	61.35	56.49	76.71	71.82	47.46	75.04	58	82.47	72.48	63.49	55.13	91.68	88.19	72.83	81.83	58.13	66.55	74.45	57.74	65.47	73.68	90.86	57.51	53.92	66.14	53.49	54.06	68.25	58.41	54.54	63.53	97.81	47.6	63.71	43.05	59.98	101.02	83.94	58.59
4608	MYBPH	0.25	0	0	0	0	0	0.24	0.23	0.27	0.23	0	0	0	0	43.02	1.48	0	0.9	0.46	0.24	0	0	0	0.71	0.49	0	0.66	0.32	0	0	1.04	0	0	0	0	0.35	0.35	0	0	0.34	0.33	0.24	0	0	0.24	0.67	0	0
5290	PIK3CA	24.42	25.28	21.02	26.24	19.14	46.34	30.74	45.71	36.48	41.83	17.42	28.15	27.97	37.58	25.11	22.77	23.09	27.2	36.19	42.79	28.97	64.19	30.1	33.57	44.81	36.95	31.01	21.01	17.45	36.77	24.48	37.87	40.01	51.75	23.82	24.82	20.84	24.57	33.53	31.31	22.28	36.72	16.76	31.4	27.1	28.49	25.57	33.96
80028	FBXL18	113.82	156.54	99.99	166.72	91.41	168.82	88.45	97.21	152.28	157.93	172.2	169.69	151.89	111.31	161.69	179.73	225.21	182.18	95.74	96.21	246.17	173.18	156.34	201.66	88.42	258.05	173.38	252.2	145.34	160.55	241.07	172.16	107.7	200.77	159.67	195.17	180.27	248.79	89.22	159.01	217.19	97.72	168.95	144.4	115.35	246.99	205.85	162.14
51550	CINP	31.67	33.9	25.44	32.46	28.32	36.57	22.35	55.79	43.73	55.7	38.21	32	21.8	37.38	29.46	26.04	22.22	30.41	36.19	33.34	34.38	27.55	20.02	24.41	33.15	35.18	23.19	38.22	35.31	36.23	29.77	36.95	22.79	33.49	19.43	27.48	22.51	33.53	26.28	22.28	22.91	26.18	21.1	34.16	26.36	37.32	26.75	33.19
23208	SYT11	25.56	22.12	22.01	24.68	14.49	22.38	35.87	16.84	23.42	11.96	15.7	39.67	33.36	13.91	32.66	22.65	23.77	28.02	39.89	39.5	20.64	28.46	44.93	30.74	48.31	21.44	48.93	17.81	16.62	39.11	34.69	12.9	35.18	24.4	22.71	12.66	18.92	14.85	40.16	33.29	32.45	47.78	16.07	16.39	36.39	15.24	31.88	11.11
164781	DAW1	0	0	0	0	0	0	0	0	0	0	0	0	0.34	0	0.33	0	0	0	0	0	0	0	0	0.77	0	0	0	0	0	0	0.37	0	0	0	0.28	0	0	0	0.26	0	0	0.26	0	0	0.76	0	0.37	0
6150	MRPL23	36.85	63.17	82.06	67.01	87.65	80.19	58.84	50.94	63.37	81.18	103.13	78.07	48.22	73.23	72.37	70.85	67.81	49.47	65.42	57.32	68.13	45.19	58.88	30.03	41.35	79.25	48.49	56.9	77.95	50.7	53.93	50.06	59.61	67.77	67.65	36.25	72.96	98.97	30.09	28.86	70.26	51.04	66.61	80.63	68.71	62.79	62.04	47.55
1466	CSRP2	89.78	46.97	82.74	93.63	79.73	90.94	93.42	40.57	46.83	37.1	73.3	78.14	105.93	62.44	87.33	90.96	69.34	41.2	90.95	63.13	84.04	85.21	90.16	33.27	114.15	44.24	54.47	74.17	64.42	97.82	42.47	54.53	105.26	80.74	71.72	70.29	85.64	219.33	147.2	104.29	74.42	134.68	81.62	95.37	119.39	76.48	89.44	159.06
284417	TMEM150B	2.91	6.09	3.73	3.76	2.57	7.51	3.77	5.58	5.55	3.91	4.42	9.59	7.78	5.49	6.02	1.42	4.28	13.47	5.1	13.28	4.35	7.49	6.86	4.98	11.7	2.35	8.7	8.03	2.71	5.22	8.81	5.93	2.25	3.97	4.13	3.92	2.59	1	3.41	8.24	4.31	25.31	3.06	6.89	10.54	3.75	6.99	5.24
6103	RPGR	10.11	3.75	5.51	7.95	8.55	7.56	6.52	5.54	9.41	4.89	7.56	11.93	14.64	5.66	8.11	9.27	7.52	6.65	6.29	12.03	5.33	8.37	6.29	19.54	11.34	9.73	13.52	16.55	8.63	10.29	7.06	5.99	12.7	10.06	8.19	5.56	17.08	3.66	11.18	15.47	14.51	12.03	7.22	3.44	13.4	10.9	11.98	8.94
22974	TPX2	15.14	53.41	13.48	39.8	21.91	99.45	1.5	114.71	98.41	171.33	33.11	14.68	7.07	104.24	10.48	49.96	38.97	50.18	1.31	33.84	47.71	29.69	2.15	7.95	4.27	64.18	1.36	83.29	19.48	4.32	42.56	113.97	6.49	103.82	28.75	89.44	13.51	115.84	0.63	7.86	8.29	4.75	9.12	68.51	5.23	217.4	3.21	58.53
55334	SLC39A9	33.44	68.44	31.28	32.81	34.92	51.64	27.4	35.15	59.77	45.75	43.93	36.25	36.5	59.69	34.08	35.21	44.32	39.82	32.46	37.72	43.6	39.48	18.39	32.78	29.54	49.01	28.75	72.91	30.88	35.19	37.05	63.11	29.17	38.59	29.93	36.46	28.75	47.12	34.8	28.63	21.75	32.86	32.69	41.84	35.04	40.83	32.24	34.18
30011	SH3KBP1	21	34.97	32.24	32.55	16.95	30.27	31.87	25.79	50.67	35.24	18.04	24.76	34.35	28.86	22.02	26.54	47.14	40.89	21.03	50.46	40.89	27.68	18.46	51.54	31.98	12.35	23.39	18.83	14.87	24.66	110.52	15.63	23.49	33.15	14.43	18.84	9.02	10.49	24.38	22.62	23.48	26.34	20.15	11.54	37.74	23.26	16.32	17.68
10097	ACTR2	100.86	127.29	111.34	125.21	117.79	161.45	108.55	146.94	183.02	170.38	109.74	107.21	109.86	129.57	97.53	134.92	122.27	138.89	94.14	165.52	112.91	139.41	72.84	101.32	110.83	138.84	121.82	166.55	99.47	110.67	227.34	243.04	126.29	153.86	137.98	160.43	98.47	138.55	106.4	98.22	93.56	161.58	101.94	143.85	120.68	120.38	96.45	155.31
8692	HYAL2	79.06	63.3	72.09	60.51	60.46	82.26	125.42	63.83	71.97	66.4	61.23	82.54	97.31	72.9	115.79	79.41	54.13	79.62	60.07	132.26	33.82	64.39	67.93	128	121.51	32.41	88.01	48.34	54.07	69.54	73.3	42.19	87.41	47.18	65.52	35.31	38.63	35.68	113.31	106.91	45.15	81	49.43	39.31	178.28	60.49	48.37	45.26
55275	VPS53	117.07	140.18	97.68	130.49	100.06	140.04	92.23	98.12	141.14	160.92	156.53	179.32	134.71	93.35	154.28	154.3	185.76	160.11	100.08	109.66	191.89	168.12	156.72	176.79	97.87	217.47	165.12	180.11	141.11	154.61	218.5	122.03	114.38	196.54	144.19	172.45	200.71	251.25	89.09	134.41	202.84	108.91	159.45	112.66	108.35	207.06	172.05	141.46
7780	SLC30A2	20.51	24.67	14.95	24.85	13.05	19.97	16.15	13.9	26.18	21.26	24.57	29.7	23.63	20.36	25.76	26.69	28.96	26.33	13.78	13.4	31.12	39.42	24.58	34.29	15.95	43.55	28.18	35.76	25.87	31.1	47.38	20.62	20.27	29.99	26.52	25.32	37.35	41.18	15.95	24.59	40.99	17.09	21.64	17.6	15.01	34.17	29.87	22.67
107985692	LOC107985692	0.59	0.51	0.36	0.6	0.35	0.51	0.27	0.32	0.29	0.17	0.5	0.79	1.04	0.41	0.9	0.6	1.04	0.31	0.49	0.38	0.65	1.07	0.58	0.59	0.32	0.47	0.8	0.46	0.62	0.92	0.67	0.36	0.58	0.83	0.21	0.09	0.54	0.5	0.12	0.34	0.97	0.38	0.45	0	0.45	0.43	0.55	0.35
79033	ERI3	52.03	93.37	55.85	67.36	57.59	89.12	81.67	165.94	68.24	71.6	82.19	67.55	68.19	91.09	63.16	54.79	71.77	88.29	83.12	73.48	50.63	72.95	61.62	56.53	81.78	63.05	63.37	140.69	41.2	87.32	54.72	159.77	65.95	68.81	43.64	88.3	40.22	68.22	77.16	62.89	60.03	73.52	34	55	51.58	118.99	83.34	48.98
10811	NOXA1	25.92	35.8	26.51	18.27	24.76	9.65	18.45	29.98	40.09	66.08	30.92	21.82	14.22	63.39	28.61	9.18	15.34	14.44	28.04	14.37	58.98	51.86	30.11	9.32	9.56	6.38	15.1	17.4	45.66	19.8	9.13	24.88	13.8	28.55	29.19	7.26	65.03	14.5	15.18	15.74	34.12	9.23	85.78	7.51	21.42	15.66	23.49	22.09
9940	DLEC1	8.27	9.12	9.51	9.57	7.75	7.63	5.35	4.76	11.58	7.78	10.57	13.15	9.55	5.94	10.41	7.42	10.86	9.81	7.03	6.72	9.24	11.05	11.6	13.65	6.23	12.15	10.04	9.36	10.92	13.53	15.09	13.13	7.6	12.03	8.42	9.07	15.39	10.94	7.07	9.51	12.77	8.83	9.56	7.67	7.63	23.89	11.79	10.54
54499	TMCO1	23.42	23.92	18.68	18.62	23.18	28.88	19.79	31.77	31.12	23.38	20.59	23.29	19.81	36.47	19.86	19.94	25.67	23.49	17.89	24.85	23.99	34.61	14.37	18.37	23.19	18.86	22.28	19.33	19.92	22.8	21.08	34.66	21.56	22.23	15.08	20.33	14.42	28.86	19.31	16.25	15.02	24.49	19.12	23.26	19.66	15.4	22.26	29.5
7098	TLR3	15.14	11.01	12.02	11.19	10.76	11.92	11.41	10.8	9.47	5.52	13.66	14.93	16.29	20.08	16.08	7.69	11.02	7.5	12.79	11.65	11.4	21.23	16.67	15	24.97	15.69	16.9	10.77	15.37	20.45	11.51	16.95	14.3	18.88	15.95	9.96	13.83	8.72	17.42	11.47	12.68	13.35	13.68	13.57	12.96	13.11	13.55	9.43
143684	FAM76B	8.29	9.23	6.97	7.94	6.89	13.56	5.62	14.16	10.8	9.5	5.27	8.41	6.48	6.6	8.37	6.96	11.64	6.65	6.31	9.19	8.42	11.13	7.49	11.32	7.93	10.94	5.49	7.9	5.56	9.53	14.14	5.83	9.49	11.92	8.11	2.75	8.81	5.23	7.37	8.9	6.47	5.33	6.64	9.45	7.97	7.96	6.62	6.6
7447	VSNL1	36.59	100	44.53	56.29	57.99	69.13	9.64	11.36	50.53	91.51	64.15	20.55	6.23	36.06	26.68	69.3	54.38	59.87	5.24	36.9	72.17	43.85	7.53	4.81	7.73	22.94	7.21	52.69	63.9	8.91	7.36	101.42	24.04	20.52	53.48	55.82	34.16	83.68	7.9	11.15	8.04	3.94	39.48	48.56	4.75	42.97	2.5	88.14
7264	GFUS	77.89	88.42	118.27	71.17	121.03	116.07	63.66	158.27	158.88	226.18	140.89	43.03	43.42	223.38	63.79	80.32	64.59	102.42	43.93	56.3	118.75	90.82	38.64	34.47	42.28	81.44	36.99	116.92	110.57	47.87	48.11	177.61	53.22	84.92	89.72	211.08	70.4	79.07	46.98	50.04	68.9	65.38	126.51	95.53	60.88	188.33	43.74	108.14
81628	TSC22D4	83.24	86.78	112.08	76.94	78.24	90.85	52.16	159.98	115.32	69.49	88.82	77.19	56.05	69.73	86	60.87	128.79	104.85	64.16	102.89	73.18	58.09	67.04	74.53	69.93	151.66	56.47	69.11	91.74	50.91	156.1	76.09	61.52	48.19	61.44	58.67	78.56	116	55.59	47.31	69.04	58.6	83.31	70.52	68.07	60.87	59.82	60.45
55693	KDM4D	1.06	1.73	1.09	0.69	0.13	2.18	0.29	1.53	1.97	2.27	0.33	0.8	0.19	1.92	0.75	0.36	0.21	1.28	0.56	1.32	0.56	1.05	0.58	1.52	0.75	0.65	0	1.36	1.28	2.05	0.63	1.94	0.66	1.28	0.49	0.42	0.43	0.55	0.58	0.84	0.61	0.59	0.6	0.97	0.59	1.85	0.42	0.65
113612	CYP2U1	10.45	2.95	7.4	6.46	4.21	4.41	13.35	5.83	6.16	3.76	3.74	10.98	10.97	3.2	9.1	4.1	8.64	4.14	13.31	12.05	3.84	10.3	12.58	9.99	19.38	2.39	14.56	2.24	4.88	16.35	12.25	1.48	12.71	2.72	4.89	1.94	3.42	0.79	11.28	11.21	8.89	14.86	3.95	1.39	13.44	2.77	15.94	2.19
3758	KCNJ1	1.14	0.22	0.17	0.44	0.33	0.64	0.19	0.18	0.21	0.18	0.63	1.17	0.49	0	1.53	0.23	1.24	1.62	0.54	1.12	0.47	0	0.99	1.38	0.38	0	0.51	0	0.76	0.52	2.99	0	0.73	0.27	0	0	0.54	0	0.37	0.53	1.04	1.13	0.19	0.41	2.02	0	0.8	0.41
6382	SDC1	389.6	717.54	527.22	367.66	757.36	742.34	8.33	425.53	568.82	677.77	845.51	260.55	19.11	483.33	294.95	560.35	478.31	411.24	6.94	166.99	820.17	370.71	7.26	80	5.44	481.82	5.42	472.54	593.9	8.87	37.11	556.76	202.87	272.66	553.47	1472.04	495.77	660.2	2.84	52.7	128.17	11.81	519.07	449.94	47.48	302.44	3.39	665.18
1356	CP	18.48	7.44	11.23	3.05	13.97	5.81	4.97	260.77	33.92	9.54	5.38	16.76	15.3	4.04	19.16	2.95	24.07	16.92	3.79	13.32	4	11.9	2.96	16.42	9.43	16.06	7.93	6.38	4.32	9.36	15.76	10.48	7.69	3.3	4.01	7.79	8.77	1.83	5.44	7.97	14.11	11.1	7.36	3.14	39.49	4.09	4.94	6.21
2729	GCLC	34.39	51.03	28.88	23.69	44.48	46.91	24.91	577.22	91.05	109.79	50	81.64	23.12	26.48	27.07	17.11	41.29	61.42	38.46	31.48	50.34	50.85	34.15	12.85	28.28	50.16	29.66	33.22	40.74	37.45	18.82	187.81	35.97	11.54	66.54	22.81	33.83	131.61	31.27	33.31	26.13	26.17	27.26	41.07	22.78	96.37	27.02	51.26
57643	ZSWIM5	5.98	6.88	3.45	4.64	5.19	5.45	9.84	3.26	4.74	0.79	9.53	10.14	8.47	3.5	5.14	1.08	14.28	2.63	10.34	4.45	5.54	9.07	10.34	3.92	9.75	8.66	10.9	26.34	5.34	12.23	4.56	11.37	8.1	7.52	6.91	2.24	4.49	1.28	10.8	6.94	11.42	7.42	6.84	1.79	7.18	11.81	12.57	11.01
79598	CEP97	23.7	31.54	17.35	28.88	19.91	36.57	17	25.18	34.65	45.21	29.27	38.81	29.45	26.01	28.81	32.45	45.43	31.69	19.88	24.98	36.8	38.07	31.17	38.39	20.84	39.42	35.04	43.59	26.06	31.62	45.41	30.82	22.62	55.55	27.06	26.22	33.22	31.11	19.45	27.45	38.24	19.45	27.03	24.76	22.81	57.33	38.78	26.11
338785	KRT79	0.79	0	1.74	1.2	1.29	0	0	0	0.23	2.57	1.63	0	0.27	0.55	2.62	3.05	0	0.26	0	0	1.83	0	0	0	0	0.61	0	2.85	7.8	0	0	0	1.87	0.3	1.85	2.67	4.2	0	0	0	1.43	0	1.1	0	0	0.29	0	0.69
10581	IFITM2	203.78	92.17	230.95	493.86	122.09	261.53	260.35	98.75	283.11	187.62	131.51	269.03	368.25	218.88	155.96	175.68	144.55	233.44	181.24	353.35	54.84	151.77	138.02	365.98	338.74	43.91	230.59	141.02	57.33	167.45	244.32	31.9	273.39	51.52	167.23	40.19	125.29	48.8	210.04	299.24	139.91	304.96	66.42	67.56	396.41	29.9	232.21	62.36
105370706	LOC105370706	0	0.54	0	0.54	0	0.53	0	0	0.51	0.45	1.03	0	0	0	0	0	1.97	3.43	0	0	0	0	0	1.36	0	0.68	0	0	0	0	0	0	0	0	0	0.66	0	0	0	0	0	0	0	0	0	0	0	0
51650	MRPS33	23.57	32.66	21.98	35.36	20.04	32.06	20.04	19.22	29.78	28.52	33.66	40.76	35.32	21.28	36.73	33.19	44.93	36.64	22.72	23.14	37.26	37.06	36.87	40.36	22.81	60.68	39.25	45.47	34.13	41.39	49.91	24.26	25.88	40.44	34.86	30.61	38.79	37.99	23.42	31.25	42.64	25.6	27.64	23.9	26.3	44.44	37.1	28.85
3340	NDST1	80.97	43.99	73.58	83.82	86.59	93.09	68.3	31.72	51.05	64.6	70.66	66.75	73.44	59.19	86.75	70.18	55.73	57.31	68.05	73.78	72.45	51.71	64.23	66.35	57.53	43.47	65.13	40.54	91.43	55.09	28.4	23.35	62.46	66.13	65.6	122.6	88.3	90.71	70.76	75.75	62.87	65.58	82.45	73.66	62.4	48.95	64.88	63.04
83882	TSPAN10	2.5	12.33	3.75	5.01	2.41	16.23	1.4	4.32	7.5	11.95	5.41	1.83	3.54	26.54	3.08	2.31	9.58	16.65	1.12	3.21	49.23	9.95	1.07	3.18	1.37	1.97	1.1	6.67	3.21	0.75	5.38	7.1	1.81	5.84	11.86	26.15	2.74	18.08	0.53	2.69	4.09	1.08	8.74	8.84	2.14	1.13	1.16	7.38
26330	GAPDHS	2.83	4.67	4.25	3.2	3.82	5.56	1.83	4.61	6.47	7.08	5.8	5.41	2.82	7.1	3.89	4.11	6.96	6.42	3.21	2.73	7.32	3.04	2.83	6.76	0.93	8.05	5.41	5.98	3.64	3.83	5.24	8.34	2.74	8.83	2.69	2.62	6.22	3.42	1.5	1.31	7.18	2.15	7.75	0.67	2.13	9.37	3.06	4.69
5936	RBM4	111.69	127.63	115.92	123.66	123.91	129.57	114.23	159.63	123.51	120.91	156.01	171.21	103.8	174.41	128.17	113.14	158.28	147.18	98.08	128.04	121.08	125.12	102.91	139.32	88.77	162.38	130.17	126.25	122.52	147.01	166.97	156.96	98.34	242.19	118.01	209.23	123.54	295.36	126.89	114.75	131.9	113.38	100.5	63.03	92.96	144.9	126.1	104.72
2843	GPR20	6.69	2.65	4.19	6.57	5.04	2.57	3.09	0.8	3.77	1.91	3.15	3.84	6.31	7.35	6.1	1.38	0.8	3.49	6.19	3.92	0.36	2.41	4.48	2.08	9.18	1.24	10.76	2.57	3.06	5.11	0	4.78	4.75	2.04	0.31	0.4	4.1	1.05	12.49	8.06	11.71	5.4	4.86	1.24	3.65	0.79	2.83	0.93
340152	ZC3H12D	22.86	38.25	31.09	36.97	24.01	30.48	18.41	19.09	42.41	23.14	38.4	47.89	35.63	20.21	38.02	28.07	66.28	47.52	17.56	34.11	67.86	45.3	30.83	69.02	18.19	39.47	29.38	45.1	34.21	32.51	117.42	24.54	24.84	37.36	27.28	27.92	34.35	32.87	11.9	28.7	44.55	20.9	28.62	15.46	32.32	50.42	39.56	27.2
84197	POMK	37.35	76.05	34	47.7	31.16	68.52	20.46	84.47	46.59	41.89	52.02	45.03	34.65	59.63	37.37	45.11	45.77	50.92	21.85	35.3	56.72	67.67	28.89	41.24	21.67	81.56	33.24	81.47	32.79	32.9	44.57	61.58	24.42	111.19	55.15	63.91	34.84	57.49	26.15	37.82	33.72	30.71	36.96	33.99	26.56	70.18	43.45	50.2
27250	PDCD4	93.77	69.26	81.11	43.97	99.82	41.03	47.05	63.66	75.93	50.91	84.69	66.82	49.73	33.12	98.86	43.28	86.89	60.52	47.51	57.41	67.49	76.19	64.31	70.27	50.69	57.33	60.94	71.62	119.65	58.46	111.69	49.49	74.19	75.8	66.52	55.01	103.97	42.74	39.66	39.38	68.06	38.59	107.4	32.6	59.01	101.4	57.79	69.55
23596	OPN3	12.3	23.56	12.46	15.62	13.93	23.75	4.95	14.86	13.3	17.6	16.48	9.48	6.33	12.33	11.17	14.81	18.18	19.68	7.27	16.95	17.77	16.25	5.26	12.47	6.41	36.62	5.19	34.14	13.29	6.93	24.63	13.89	8.56	16.29	12.24	18.94	6.74	21.65	3.75	3.08	5.5	6.34	12.94	13.06	11.71	31.44	4.5	13.81
1230	CCR1	5.43	13.34	3.66	9.96	4.71	20.41	10.98	7.46	12.29	3.34	7.54	22.18	30.55	14.39	9.63	9.67	7.97	28.09	7.69	36.78	3.94	11.69	2.61	18.21	33.81	8.19	11.44	7.72	2.67	8.94	19.28	15.5	9.05	2.85	8.16	11.29	4.78	2.25	13.44	12.45	5.46	55.68	1.84	6.85	16.06	6.2	12.95	3.97
344805	TMPRSS7	1.77	2.91	2.36	1.64	1.29	1.98	1.35	0.91	1.12	1.8	2.45	1.96	2.7	2.29	1.95	1.49	3.41	2.42	1.05	0.55	1.99	2.56	1.88	2.23	1.45	4.26	2.57	2.43	4.01	2.33	2.8	1.14	2.29	3.42	2.91	0.96	3.03	2.02	1.4	2.27	3.27	1.48	3.8	1.06	1.48	0.81	2.82	2.43
25973	PARS2	4.01	10.67	4.99	6.47	5.8	3.58	4.61	16.44	7.84	7.87	5.8	4.54	3.17	7.58	6.13	4.08	4.49	6.19	6.54	5.7	3.27	5	4.41	2.46	4.9	8.95	2.27	7.97	5.22	5.16	5.03	14.13	3.74	5.89	2.86	4.76	2.96	5.99	4.19	2.65	3.84	5.04	4.89	5.68	2.21	10.08	3.45	3.66
151176	ERFE	0.15	1.39	0.41	4.82	0.13	3.87	0.29	12.98	2.14	5.42	1.32	1.21	2.73	0.83	2.07	2.9	1.47	4.02	0.42	2.64	1.87	1.26	1.17	2.4	1.05	1.95	1.61	1.35	0.16	0.41	2.75	1.11	0.5	11.12	2.12	1.48	0.21	1.84	0.15	1.69	0.82	2.08	0.45	3.24	2.21	0.62	3.39	2.11
53373	TPCN1	71.7	44.5	67.69	66.63	58.02	40.29	58.33	23.37	51.89	31.6	67.59	62.69	57.69	25.54	81.67	44.27	59.5	58.21	58.42	66.1	77.44	59.68	64.84	70.81	55.4	55.01	67.29	43.08	85.43	46.38	56.94	34.76	60.31	38.04	72.58	28.35	112.7	48.64	44.35	48.91	60.8	64.9	98.32	48.39	65.31	67.65	62.2	49.15
9322	TRIP10	211.72	63.68	242.27	164.96	252.29	60.53	135.77	56.9	74.23	87.04	204.75	110.04	85.02	85.33	220.68	89.65	71.49	73.82	114.24	72.26	111.12	54.83	115.3	116.91	91.27	92.23	107.81	91.91	305.98	108.09	48.93	56.88	179.77	65.31	270.9	74.21	431.44	98.84	119.64	126.5	197.83	111.84	226.88	75.03	84.61	62.48	127.87	133.27
9963	SLC23A1	1.63	2.8	2.1	4.26	2.36	2.45	0.88	2.21	2.56	2.85	2.55	6.17	1.73	2.4	3.19	2.44	5.54	3.83	1.35	2.3	3.26	4.17	2.85	1.89	1.53	1.75	2.26	7.07	2.83	2.21	10.33	2.24	1.62	2.97	3.15	3.6	5.01	1.65	0.78	2.25	1.59	2.03	3.41	2.98	2.61	3.15	1.82	2.68
5802	PTPRS	107.85	130.65	83.37	89.1	61.26	66.83	127.76	160.52	74.94	78.6	91.34	123.05	124.91	169.19	123.35	52.57	92.44	48.87	129.07	88.28	52.86	86.04	144.76	126.56	127.53	72.25	142.77	74.19	66.21	109.08	26.45	53.39	100.58	118.62	155.14	25.86	62.5	134.74	138.82	105.22	119.44	106.58	70.26	12.15	112.41	160.09	112.13	38.91
4676	NAP1L4	78.05	132.55	79.3	86.88	78.45	116.78	98.91	101.67	101.12	116.81	109.27	93.53	65.33	106.2	84.43	100.48	89.46	94.1	99.94	87.44	97.7	102.93	86.28	67.92	97.16	158.98	101.87	73.48	93.88	85.5	107.02	93.91	105.13	118.79	110.21	75.37	87.97	145.28	89.63	79.88	103.84	99.5	88.01	94.13	81.63	83.3	82.72	118.42
3052	HCCS	11.79	11.27	11.52	14.26	12.34	11.44	15.39	56.42	13.69	11.92	10.51	13.89	10.19	14.35	10.77	11.34	15.22	11.68	15.42	16.33	8.95	11.6	13.95	6.49	17.18	11.71	16.12	23.91	10.05	15.2	11.96	25.28	13.07	6.31	10.93	20.84	8.26	10.11	14.43	10.37	10.46	17.74	8.95	11.77	8.22	8.84	8.75	7.46
4256	MGP	261.08	76.55	143.26	89.79	40.82	83.51	449.15	117.68	150.22	50.51	53.1	298.39	620.48	25.82	334.54	66.99	115.21	83.54	272.04	449.21	13.81	254.71	330.95	479.31	473.63	14.45	415.94	23.87	27.77	446.69	30.52	3.27	293.77	55.69	202.09	15.26	77.59	25.24	353.72	267.96	130.71	229.01	38.72	10.52	440.49	15.64	383.43	9.95
253260	RICTOR	25.02	16.62	21.63	18.55	18.73	48.57	21.61	48.32	34.71	31.96	17.06	28.84	27.49	27.47	26.17	18.34	27.57	29.12	26.47	31.27	23.19	29.15	28.71	23.83	33.64	57.09	27.77	23.92	17.94	29.18	38.48	34.49	34.48	23.93	36.17	18.42	21.23	23.48	29.59	24.78	21.02	28.32	18.82	15.69	23.56	27.98	25.19	22.72
93587	TRMT10A	2.41	1.57	1.36	1.74	2.49	2.1	2.18	4.61	2.64	3.44	3.97	2.34	0.95	2.74	1.46	2.37	2.93	1	1.94	1.95	0.93	2.26	1.07	1.45	1.62	1.39	2.48	0.64	2.99	2.56	3.68	2.66	2.48	1.66	2.03	1.23	2.01	1.66	2.06	0.82	2.7	2.83	1.99	1.61	2.33	1.71	2.3	1.72
367	AR	12.49	7.49	7.05	3.5	6.38	2.74	11.98	2.51	1.93	1.45	9.42	4.72	8.21	1.2	10.96	5.15	3.05	3.1	6.45	2.15	1.48	5.11	10.75	4.61	9.26	0.77	7.54	1.15	6.34	4.97	0.83	1.67	7.58	1.92	3.12	0.72	4.12	0.85	7.17	4.64	8.32	5.28	4.63	1.1	5.87	0.12	4.42	1.22
6194	RPS6	1413.48	1573.34	1496.48	732.15	1204.59	645.67	779.25	694.11	1245.1	1213.64	960.19	654.18	691.45	776.42	956.94	617.88	770.16	585.93	905.53	1139.33	570.99	715.56	650.29	896.16	692.56	1112.89	691.41	744.29	1311.49	822.38	1489.31	1788.74	962.34	969.7	980.45	390.92	781.99	654.58	947.87	760.95	570.99	882.84	937.73	1238.49	948.37	1445.65	674.88	850.84
54780	NSMCE4A	44.09	40.97	35.61	34.71	42.88	32.75	46.98	65.98	98.2	151.92	42.59	57.66	62.46	43.25	62.51	35.39	41.63	50.17	68.3	66.21	49.19	50.39	58.2	36.07	71.08	31.75	54.69	41.58	39.95	74.17	54.45	55.8	63.08	70.09	49.8	23.58	45.84	22.65	66.65	61.44	57.41	74.29	49.65	43.5	52.31	47.56	84.42	51.08
342574	KRT27	0	0	0	0.32	0.24	0	0.27	0	0	0.24	0	0	0	0.5	0	0	0	0.33	0	0.27	0	0	0	0	0	0	0	0	0	0	0.39	0	0.3	0	0.3	0.39	0	0.67	0	0	0.37	0	0	0	0.27	0	0	0.5
3444	IFNA7	0	0	0	0	0	0	0	0	0	0	0	0	0	0	0	0	0	0	0	0	0	0.88	0	0	0	0	0	0	0	0	0	0	0	0	0	0	0	0	0	0	0	0	0	0	0	0	0	0
64130	LIN7B	15.41	21.13	12.16	9.32	20.29	9.85	12.22	9.55	9.16	8.17	12.94	10.01	11.99	6.54	15.43	9.6	8.76	10.59	19.15	11.29	15.26	6.86	10.83	6.53	16.31	9.85	12.53	22.9	19.43	13.5	8.21	16.31	12.28	11.45	10.55	11.63	14.33	13.7	13.83	9.92	19.65	10.81	13.47	10.8	17.14	19.81	6.84	12.27
10462	CLEC10A	13.67	14.34	31.23	8.95	11.04	8.45	12.69	4.76	20.46	5.89	15.12	26.46	27.36	0	22.27	10.07	15.11	15.07	15.95	61.16	4.69	22.89	11.17	24.6	17.27	1.16	27.84	4.84	10.9	11.97	23.68	3.5	20.21	0.38	15.2	0.38	6.17	0.99	16.87	19.07	9.54	44.01	5.92	2.9	49.73	0.74	15.08	6.4
6531	SLC6A3	0.11	0.13	0	0.26	0	0	0	0	0.12	0.11	0.12	0.45	0	0.1	0	0	0	0.68	0	0.22	0.83	0.47	0	0.32	0	0	0.15	0.14	0	0	0	0	0.25	0	0.48	0.94	0.16	0	0	0.16	0	0	0	0.24	0.55	0.61	0.16	0.6
8547	FCN3	1.35	1.03	0.81	1.52	2.72	2.49	0.44	2.06	0.49	0.42	0.49	1.19	1.15	1.22	1.66	1.6	0.62	1.08	0.83	0.43	0	0	1.16	0.64	27	8.27	1.79	2.28	0.47	0.61	5.62	0.82	0.49	1.26	0	0.62	3.16	0	0.43	0	2.42	1.32	0.88	0.96	0	0.61	0.63	0.48
145501	ISM2	0.87	20.58	0.55	0.34	0.4	0	0.17	0.28	0	0	1.16	1.19	0.88	0.69	0.64	0.21	1.05	0	0.16	0.17	0	0.84	0.22	0	0.15	0.25	0.23	1.31	2.72	1.24	0.48	2.37	0.75	0.73	3.42	0.48	2.15	0.36	0.73	0.24	0.23	0.17	0.17	0	0	2.81	0	0.18
5604	MAP2K1	51.82	45.48	54.74	58.07	52.13	75.41	40	59.98	54.73	66.86	37.26	40.87	36.68	49.05	50.39	51.81	49.47	57.28	41.98	54.62	45.4	45.27	36.62	51.83	40.86	29.39	37.84	55.08	42.51	36.65	67.24	40.98	42.58	31.03	48.45	74.87	48	32.25	40.03	44.31	38.24	52.05	54.52	36.65	52.08	49.53	48.08	49.54
636	BICD1	18.28	21.01	15.43	38.42	12.89	29.01	16.28	21.34	31.68	28.17	18.58	29.48	26.52	28.7	22.22	33.22	30.72	39.19	17.49	29.95	39.84	60.85	21.36	43.83	22.55	49.93	27.31	35.53	14.73	28.48	51.01	17.83	18.57	79.6	19.29	23.36	20.21	39.7	17.15	30.85	27.24	22.02	13.77	14.3	18.9	75.29	32.62	17.87
6875	TAF4B	11.18	15.52	11.93	18.28	13.47	22.14	17.43	25.71	22.74	18.64	14.8	21.71	10.53	6.49	13.92	10.72	23.17	16.32	13.52	16.35	29.01	19.69	11.34	20.67	9.68	27.31	10.6	36.45	11.14	9.62	50.42	30.39	15.12	25.79	24.42	11.73	16.41	14.7	13.08	14.87	14.32	15.76	12.71	8.63	15.25	38.65	7.45	15.11
6611	SMS	54.39	48.5	44.21	72.73	39.22	57.49	72.88	178.06	70.33	67.05	36.46	49.36	61.81	60.12	44.88	55.01	56.98	71.85	74.12	73.2	49.95	42.75	61.16	32.84	86.38	59.8	59.18	101.59	34.64	65.01	47.09	72.7	57.68	61.72	52.13	90.42	45.96	81.21	68.11	74.93	63.53	79.78	37.41	44.62	50.39	182.89	49.09	49.76
2199	FBLN2	262.39	64.23	111.73	181.78	41.38	103.58	243.57	38.33	115.04	48.4	54.49	103.77	194.38	83.74	172.55	163.51	74.89	80.57	199.9	147.19	17.29	81.92	94.6	277.56	189.53	26.44	270.27	46.01	52.47	124.98	18.63	12.55	158.85	80.51	61.73	89.79	44.73	52.52	198.48	117.59	99.03	116.58	24.9	58.3	533.87	6.81	52.06	15.63
1628	DBP	21.94	38.8	40.09	16.52	33.66	18.96	37.5	18.64	19.6	12.64	30	20.59	23.97	24.98	35.32	19.64	24.17	23.28	47.7	36.16	20.24	20.61	33.48	17.76	31.39	10.84	15.56	22.53	43.8	36.54	33.95	45.91	29.09	30.33	24.84	21.6	13.76	7.02	21.55	11.46	19.79	23.3	34.75	17.65	34.41	15.74	18.98	18.61
83692	CD99L2	35.75	41.71	32.13	47.14	22.98	27.64	69.87	40.19	27.87	21.96	22.65	65.42	62.92	12.68	45.56	35.08	37.78	31.22	69.69	54.8	25.1	52.89	69.68	41.75	67.76	32.4	70.07	35.9	23.29	61.03	33.11	19.74	52.48	35.2	31.7	19.83	24.5	16.69	67.87	52.08	45.64	64.86	13.77	18.3	48.02	17.86	69.32	16.03
389762	SPATA31D3	0	0	0	0	0	0	0	0	0	0	0	0	0	0	0	0	0	0	0	0	0	0	0	0	0	0	0	0	0	0	0	0	0	0	0	0	0	0	0	0	0	0	0	0	0	0	0	0
9788	MTSS1	68.46	151.3	80.97	64.07	69.02	98.51	60.91	76.2	136.86	167.71	126.99	79.17	60.09	111.17	80.19	108.72	64.89	65.9	69.95	62.16	155.52	133.8	70.72	87.19	66.1	126.86	75.15	57.58	79.14	63.56	49.91	72.73	65.03	50.98	112.24	156.76	100.31	193.35	50.36	55.16	81.16	68.79	64.2	68.55	58.75	74.38	76.39	121.12
9212	AURKB	15.81	41.73	11.83	22.11	15.54	52.97	0.55	79.57	74.41	202.83	35.82	12.46	5.38	78.1	5.77	35.83	37.54	44.36	0.73	27.36	37.44	28.46	0.88	7.87	2.78	62.36	0	38.1	20.18	2.13	39.1	129.54	3.72	115.09	19.3	79.75	12.01	110.6	1.08	7.37	11.96	4.22	11.63	65.24	2.72	60.64	2.73	33.64
4241	MELTF	14.57	25.94	12.26	29.66	9.18	29.87	10.86	29.87	36.37	101.4	20.7	19.7	11.18	109.59	10.66	11.96	13.63	18.56	8.19	32.35	34.03	40.89	9.77	27.98	10.87	31.39	10.05	16.57	7.81	8.08	15.75	35.26	8.34	73.08	21.34	53.92	10.84	18.82	9.67	12.02	26.69	7.91	6.64	11.06	18.51	47.11	10.67	17.5
51428	DDX41	34.16	43.87	39.69	39.93	35.15	48.73	30.69	32.33	45.07	61.51	39	30.48	27.78	54.88	28.71	54.2	42.03	43.58	31.37	47.21	40.34	31.7	25.28	35.24	29.41	33.61	30.27	29.56	34.84	26.12	46.66	26.7	30.02	36.91	38.32	68.98	45.22	97.67	29.82	30.3	36.66	32.64	35.43	66.74	33.57	54.97	31.52	44.81
105371063	LOC105371063	425.53	632.9	457.02	666.99	423.59	551.34	378.08	383.76	592.4	563.48	670.72	851.06	610.3	445.36	794.61	651.82	983.15	741.15	390.61	452.71	933.72	893.55	692.13	851.78	383.64	1054.89	778.41	742.69	592.25	839.59	1219.43	520.32	529.49	1019.91	685.87	677.76	1013.04	812.51	368.66	815.21	1138.18	362.53	668.48	390.77	546.91	1025.34	906.69	605.29
51321	AMZ2	52.98	85.42	46.83	48.23	45.01	72.11	82.51	108.66	55.95	68.09	42.64	53.9	43.87	43.01	51.59	35.94	69.23	73.93	69.25	68.34	66.13	59.64	49.14	51	76.66	122.66	66.36	32.09	39.65	65.97	56.01	121.36	47.09	56.03	38.47	77.32	26.23	53.39	68.04	49.68	42.51	62.7	36.12	56.22	39.76	38.08	44.23	40.67
220988	HNRNPA3	93.37	92.95	78.19	78	71.3	93.58	80.79	97.55	121.43	133.96	89	104.09	83.55	59.9	92.43	85.09	116.92	91.24	90.02	86.63	94.55	121.98	87.08	92.16	96.45	101.98	98.91	112.79	84.36	102.25	128.03	137.92	115.36	139.98	97.02	62.15	103.88	246.02	79.49	93.16	121.69	84.89	66.15	42.39	70.99	134.72	96.18	75.22
1594	CYP27B1	1.33	2.59	0.34	7.71	0	2.09	0.55	1.91	3.49	3.73	1.64	1.25	0.97	5.65	1.17	11.49	2.1	5.69	0	4.57	1.86	1.57	0.49	2.17	0.75	9.69	0.25	6.96	0.6	1.03	6.31	5.54	0	2.39	1.22	13.67	1.6	2.06	0.36	1.84	1.27	0.74	0.93	30.62	0.92	6.16	1.32	5.04
729877	TBC1D3H	0	0.19	1.52	1.62	0.55	0.6	0.82	0	1.19	0	3.15	4.47	4	1.75	2.41	1.36	4.22	0	0.78	1.83	3.84	1.64	2.16	2.9	0.81	0	1.34	0.36	1.54	3.07	0	1.97	1.22	0.23	5.02	3.91	8.13	0.89	0.23	1.12	0	1.55	5.19	4.22	0.86	5.54	5.08	3.05
2330	FMO5	17.93	21.21	13.07	18.84	13.84	23.67	10.95	16.57	15.86	12.2	22.61	25.95	22.56	15.59	22.28	20.56	28.33	17.61	11.03	13.1	28.02	37.53	23.97	28.33	11.69	24.16	21.55	27.27	20.04	21.47	39.94	14.72	12.88	23.45	16.95	14.97	25.92	18.87	10.43	19.26	27.77	12.36	45.32	15.02	15.51	27.27	20.87	15.91
7057	THBS1	290.38	122.36	267.8	1411.86	204.28	653.28	1893.32	296.35	475.14	245.77	239.71	2019.29	2899.68	283.08	453.55	631.08	599.43	648.38	680.9	1320.86	92.39	506.93	1996.2	1780.27	926.6	143.68	690.02	163.09	55.24	1065.8	169.2	45.19	1487.08	344	2555.23	492.09	1926.67	201.91	2849.1	6014.48	1385.51	4999.05	302.36	387.79	2028.43	128.5	4492.92	754.86
105370733	LOC105370733	8.05	10.84	9.94	9.48	7.46	10.49	5	9.08	9.69	9.36	13.32	14.87	8.04	7.31	9.53	11.84	10.78	8.61	5.32	7.61	15.5	13.4	11.88	9.53	5.27	8.19	10.99	12.74	10.96	14.64	16.55	7.66	9.09	14.56	8.24	7.16	17.3	10.55	7.6	8.35	10.73	5.1	2.97	7.05	5.5	12.16	6.75	10.29
107987233	LOC107987233	1.36	0	0	0	0	0	0	0	0	0	0	0	0	0	0	0.5	0	0	0	0	0	0	0	0.95	0	0	0.38	0	0	0	0	0	0.69	0.48	0	0	0.41	0	0	0	0	0	0	1.23	0	0	0	0
8550	MAPKAPK5	52.81	75.75	48.72	74.87	47.19	72.88	43.56	50.67	71.42	62.35	87.18	96.62	72.72	54.23	82.89	83.57	111.36	81.85	47.1	51.51	101.51	95.75	81.43	98.66	46.11	122.45	83.74	99.24	76.88	83.05	125.43	67.04	54.61	99.29	76.66	80.58	99.04	98.3	41.63	85.1	115.85	50.44	70.73	49.9	59.62	133.77	103.16	68.97
6899	TBX1	20.17	20.54	17.27	22.5	19.65	37.1	14.79	36.48	21.31	18.14	21.57	15.37	28.78	52.39	40.43	48.27	45.76	33.13	10.8	22.79	69.39	50.65	17.67	24.85	13.42	122.26	15.38	33.61	16.55	14.76	25.85	14.11	7.35	116.18	12.96	47.14	15.22	39.57	10	15.19	23.49	11.38	11.18	33.91	13.81	37.44	13.74	41.62
161253	REM2	1.31	3.61	1.95	1.37	1.78	1.61	0.84	0.89	2.11	1.73	2.35	3.55	0.93	4.04	2.41	0.26	1.8	2.05	2.03	1.17	1.49	0.6	4.31	2.49	0.43	1.38	0.71	2.2	1.14	1.18	6.03	1.11	1.59	2.39	0.78	1.01	1.53	0.29	0.7	0.98	1.46	1.27	1.13	1.03	1.41	2.31	0.68	1.3
409	ARRB2	41.57	58.94	49.43	66.55	37.41	74.04	50.82	84.05	76.43	59.7	37.56	62.64	66.95	40.09	44.01	42.35	64.27	101.32	61.72	109.19	47.45	57.76	40.03	85.81	69.27	46.17	53.19	41.5	27.08	30.74	119.21	57.22	44.15	50.72	45.59	52.27	34.99	37.56	40.09	57.4	48.54	107.78	38.02	45.44	89.88	44.99	61.85	47.76
348487	FAM131C	0.79	1.2	2.37	3.57	2.06	1.45	0.76	5.07	2.85	4.94	3.14	2.09	1.01	4.52	0.98	2.5	3.28	4.11	2.44	5.33	3.23	1.09	1.35	0.75	1.04	1.5	1.05	0.33	1.11	0	0.73	6.26	1.44	2.59	1.13	3.29	0.74	7	0.5	0	1.77	0.77	1.82	2.8	0.51	4.28	0.37	5.33
57159	TRIM54	1.25	0.58	1.46	0.36	0.78	0.58	0	0.78	0.7	1.09	0.31	1.25	1.28	3.21	27.34	1.08	0.92	1.52	0.25	0.79	0.86	0.63	0.42	1.27	1.71	1.12	1.81	4.91	0.67	0.2	2.2	0.59	0.73	0.97	0.98	0.33	0.76	0.74	0.58	0.48	1	0.42	1.24	0	0.68	1.11	1.34	0.7
51338	MS4A4A	7.23	4.47	7.45	7.42	3.48	18.17	23.84	8.03	24.31	6.02	4.35	36.86	42.74	8.7	24.9	11.71	6.54	18.23	9.98	46.26	1.47	16.46	9.16	26.92	53.44	5.08	37.86	6.6	3.56	23.91	8.1	7.31	15.6	1.26	10.67	6.11	6.11	1.94	21.4	21.12	13.23	66.27	3.55	7.68	43.79	3.26	18.26	2.11
2925	GRPR	0.37	0	0.67	4.83	0	0.62	22.29	1.19	0.4	0.35	1.21	6.63	3.09	0.17	8.95	0.88	1.8	2.9	5.51	4.66	0.46	4.62	11.94	0.8	23.68	0.26	19.92	0.47	0.39	5.53	1.03	0.68	16.61	8.87	0.6	0	0.52	0	5.15	4.12	17.97	13.45	0.37	0	0	7.55	4.65	0.79
128209	KLF17	4.36	3.46	3.81	7.04	3.97	6.2	3.4	3.67	3.5	3	3.96	17.23	19.89	1.63	4.49	1.69	4.09	6.5	10.5	10.86	3.39	6.83	15.92	5.27	10.46	3.45	5.51	4.23	3.94	36.32	6.84	2.9	5.6	4.1	7.11	2.91	11.31	5.34	14.28	16.06	8.2	8.46	1.55	2.22	4.09	4.93	26.9	1.63
4212	MEIS2	48.92	18.41	28.19	38.73	29.5	36.22	60.17	12.69	22.01	20.84	21.51	55.44	64.52	21.07	42.46	18.57	27.53	14.37	73.13	45.34	12.73	36.03	92.63	20.88	76.34	19.15	80.23	15.02	22.85	86.43	5.53	3.11	58.5	22.19	27.73	6.18	27.11	15.72	70.83	46.46	63.77	53	26.83	8.41	34.61	39.7	87.35	17.36
1460	CSNK2B	152.16	121	153.22	161.65	155.46	230.38	126.27	230.33	176.43	190.81	148.7	148.12	122.77	139.14	142.68	188.1	149.68	188.63	144.49	175.1	146.66	115.96	138.8	133.99	130.59	141	108.54	113.35	119.14	98.79	168.44	209.6	117.75	160.76	99.01	176.26	122.8	197.83	106.54	116.5	132.34	100.25	116.27	170.14	97.67	130.23	109.78	148.61
85013	TMEM128	17.83	14.34	8.43	8.17	13.22	13.93	12.38	16.1	13.04	9	13.73	11.7	11.02	12.72	12.95	11.62	8.72	5.32	16.15	17.01	10.31	18.72	15.23	9.53	13.88	13.64	17.36	9.82	13.74	19.16	16.15	13.6	15.88	17.1	14.1	16.41	19.64	14.3	14.5	13.72	10.86	14.63	13.01	13.35	17.15	9.48	16.93	4.17
105369214	LOC105369214	0.23	0	0	0	0	0	0.22	0	0.25	0.21	0.5	0.3	0.58	0	0.28	0	0.32	0	0.42	0	0	0	0	0	0.23	0.32	0	0	0	0	0.63	0	0	0	0	0	0	0.28	0	0	0	0	0	0.49	0	0	0	0
139285	AMER1	13.46	15.49	8.77	7.87	10.81	9.99	7.42	13.8	9.41	7.31	14.97	12.96	8.02	7.71	10.39	7.57	7.89	8.48	11.21	6.08	9.78	13.85	11.17	6.36	10.21	11.83	10.24	10.93	12.97	11.46	7.6	11.58	8.69	19.16	7.11	21.05	11.65	5.3	8.84	7.81	8.73	6.72	11.18	5.92	7.35	12.86	9.16	8.64
55739	NAXD	30.64	29.96	34.15	35.74	31.39	43.83	36.73	18.77	32.85	30.53	34.34	39.14	32.93	49.12	36.97	29.66	28.02	25.76	45.3	34.2	33.65	33.73	41.83	28.57	40.59	35.19	45.87	25.64	35.71	46.86	30.81	20.93	30.13	18.55	35.46	27.77	45.25	84.37	45.24	45.26	49.95	44.96	39.75	33.31	34.79	26.32	49.41	34.12
105378105	LOC105378105	0	0	0	0	0	0	0	0	0	0.33	0	0	0	0	0	0	0	0	0	0	0	0	0	0	0	0	0	0	0	0	0	0	0	0	0	0	0	0	0	0	0	0	0	0	0	0	0	0
2028	ENPEP	3.41	2.33	4.02	7.51	3.11	9.79	7.26	6.88	6.09	5.99	2.77	6.08	17.43	12.16	10.71	12.36	7.07	6.14	8.21	8.71	6.06	12.39	7.88	18.07	16.75	2.85	11.28	1.73	3.05	6.69	2.13	3.12	7.62	3.59	8.71	5.41	2.89	8.03	10.58	10.87	5.49	4.83	1.85	10.87	14.67	7.62	8.05	4.53
4636	MYL5	19.84	21.75	26.14	19.53	24.34	9.94	18.98	15.63	21.89	17.7	30.99	22.63	23.05	10.62	25.87	15.36	26.6	29.58	20.97	16.36	26.34	18.99	22.99	34.7	10.61	12.97	14.25	19.32	33.86	38.29	22.57	16.65	9.67	16.66	22.23	12.61	39.45	14.32	18.1	21.95	40.1	14.7	29.81	12.23	12.5	15.85	30.79	13.21
401124	DTHD1	2.35	4.07	4.17	2.1	1.24	0.89	0.97	2.98	8.64	18.34	1.99	2.64	1.48	0.28	0.85	0.91	9.48	6.28	0.94	4.26	4.25	3.05	1.48	4.56	0.98	1.31	0.69	1.46	1.22	0.85	9.04	0.76	2.27	2	0.71	0.64	1.74	1.96	1.13	2.18	1.67	2.49	1.47	0	1.49	1.57	0.96	1.48
79946	C10orf95	7.69	9.78	7.97	6.57	11.62	8.81	4.54	7.89	11.4	15.05	11.51	4.36	3.44	7.78	8.63	8.87	13.46	14.11	5.04	7.16	11.49	9.88	6.72	9.39	5.03	10.91	6.13	14.35	10.26	7.95	17.21	17.31	3.98	21.77	4.38	4	11.15	7.03	4.35	4.89	7.16	2.83	7.91	7.4	7.58	16.04	5.16	7.6
94104	PAXBP1	28.28	29.18	17.5	26.39	23.68	35.17	21.25	41.46	31.53	21.48	25.01	28.73	26.01	30.95	29.6	28.05	28.47	24.74	24.41	26.56	24.71	22.81	30.84	36.61	26.15	53.63	28.38	30.51	22.54	31.99	32.66	31.51	36.98	40.89	29.66	24.54	35.71	27.08	24.27	35.39	41.78	27.22	40.09	18.81	25.46	31.75	34.91	29.95
10486	CAP2	24.81	5.59	14.3	22.48	17.67	19.2	92.08	11.21	10.93	7.75	11.44	26.82	50.4	6.89	63.85	10.91	15.24	12.87	88.12	26.27	10.12	22.16	75.79	10.09	72.37	5.21	83.23	2.32	9.34	59.63	3.82	1.83	60.32	13.32	20.13	8.25	12.44	11.28	67.83	39.25	60.84	60.6	10.81	10.74	19.97	2.69	29.34	7.14
3305	HSPA1L	1.31	0.75	1.03	0.76	1.71	2.03	1.59	1.96	1.24	0.32	1.07	1.94	1.25	1.03	0.2	0.97	0.68	1.38	2.28	1.58	1	1.59	2.28	0.94	2.43	1.16	0.65	1.81	0.14	2.65	2.51	1.2	1.79	2.3	1.58	0.23	0.23	1.99	2.03	0.72	1.93	1.6	1.29	0.69	0.95	0.22	1.13	0.35
55793	MINDY1	73.04	51.69	61.02	58.16	66.27	42.72	52.22	35.35	49.92	31.52	71.4	65.98	60.47	43.94	74.79	46.62	60.18	52.02	56.22	42.53	71.31	75.97	72.57	73.46	48.1	88.69	66.34	52.3	92.36	60.74	70.98	48.77	62.17	73.26	76.77	43.83	91.84	49.8	53.73	57.05	75.41	50.19	103.2	41.2	77.49	57.48	92.77	66.04
54876	DCAF16	69.41	82.95	60.18	74.96	62.2	83.12	59.5	70.41	83.27	66.42	90.36	112.79	86.57	70.66	92.68	83.73	118.41	90.22	58.97	70.01	103.54	104.94	97.32	113.27	62.03	133.1	91.82	111.62	90.46	105.47	129.32	77.54	69.71	135.79	82.99	83.09	105.53	100.8	62.27	82.78	109.69	62.82	77.67	61.7	70.78	112.41	116.25	72.79
1601	DAB2	38.17	23.29	35.74	72.97	18.89	74.61	72.49	31.06	56.2	21.09	23.13	103.07	142.45	33.71	66.87	65.61	34.46	53.44	68.05	127.38	13.34	69.72	54.44	150.44	131.02	30.73	101.34	24.78	14.38	95.75	34.04	16.43	65.7	17.13	37.2	22.95	32.67	16.46	86.79	81.65	47.79	132.67	14.84	22.85	107.52	8.05	73.59	16.58
54584	GNB1L	4.75	11.21	4.89	8.43	4.46	11.8	4.48	15.84	7.67	10.79	6.71	7.59	5.72	14.63	6.58	8.35	8.84	9.32	5.17	5.98	12.84	15.88	6.84	8.49	4.33	12.53	4.87	8.54	6.43	5.71	8.09	8.86	4.11	5.26	6.8	12.38	7.27	18.46	4.12	4.72	7.39	4.32	4.78	5.58	5.47	10.02	5.29	7.74
9048	ARTN	8.01	23.49	2.28	20.4	7.7	37.82	4.04	32.8	30.84	70.1	3.83	12.56	5.67	32.6	1.96	9.1	12.74	25.48	5.57	12.08	31.17	19.59	6.51	6.48	2.75	78.28	1.26	50.08	1.46	3.86	1.76	157.62	1.73	8.3	7.82	59.33	12.96	91.33	5.32	11.41	8.88	2.48	7.2	40.28	9.18	88.36	2.9	34.68
126205	NLRP8	6.17	9.62	6.85	8.77	5.71	8.78	4.11	6.7	7.99	7.18	8.49	12.81	9.11	6.5	9.82	14.03	11.75	9.58	5.54	6.77	14.18	10.26	8.17	12.71	5.73	14.3	13.65	13.92	9.41	9.7	15.37	8.82	4.7	11.84	8.26	7.92	14.87	12.02	5.52	9.99	10.65	6.77	7.6	7.71	6.04	10.81	13.05	8.31
1359	CPA3	45.25	28.44	43.99	15.39	21.64	85.71	75.06	14.37	49.77	11.32	20.35	60.46	93.95	18.1	83.77	49.78	43.36	53.08	38.09	97.38	19.51	45.74	28.72	37.91	27.41	2.19	62.56	43.27	26.5	45.89	10.7	4.23	78.41	5.77	15.67	1.43	10.51	2.79	33.13	17.46	4.83	19.59	7.09	6.56	59.12	0.7	48.9	22.44
1849	DUSP7	61.04	130.57	53.76	83.05	96.8	68.85	20.44	36.79	90.73	139.64	129.05	50.51	15.63	124.59	40.37	81.03	59.55	66.88	27.34	38.95	143.74	77.39	15.71	35.79	23.62	122.73	21.28	95.23	59.01	23.01	21.94	54.92	36.93	36.74	94.85	107.31	51.94	109.97	19.93	27.64	49.62	23.39	53.41	116.13	20.04	130.32	23.26	145.21
64772	ENGASE	29.48	27.99	19.99	35.15	21.1	28.88	13.69	18.65	35.94	36.32	15.4	31.85	30.09	23.21	25.47	31.39	31.25	39.42	19.83	27.61	38.99	26.23	28.24	35.03	23.34	26.54	26.25	127.33	20.08	28.51	59.86	20.37	14.02	21.32	19.78	16.48	42.31	35.71	17.01	27.22	51.32	21.72	41.08	19.61	27.28	30.15	34.63	40.89
3146	HMGB1	153.25	170.76	140.83	134.31	154.87	286.33	153.75	164.24	210.5	241.79	155.55	163.1	151.35	206.68	151.89	179.77	197.23	147.67	179.71	231.17	158.77	163.52	152.66	157.15	184.2	190.69	152.18	157.05	135.04	176.95	217.31	264.87	209.56	270.48	170.88	135.85	140.7	191.69	168.57	181.1	170.78	163.37	122.88	243.12	134.65	157.56	146.44	157.73
79876	UBA5	24.06	20	17.18	23.76	18.14	30.88	18.86	35.31	30.65	44.22	20.62	24.55	22.01	27.73	23.03	21.77	22.33	19.37	21.5	19.55	21.44	23.28	26.72	27.67	24.31	22.67	26.36	27.1	19.5	32.48	26.86	20.15	25.7	33.71	20.95	18.17	28.89	42.52	23.2	23.81	30.64	23.88	26.08	13.82	22.87	32.39	28.38	25.84
10295	BCKDK	47.84	66.16	55.35	70.19	46.11	72.89	58.89	61.24	63.56	71.88	51.04	54.38	53.19	77.45	59.12	59.26	50.86	76.09	73.27	73.23	44.67	43.1	64.51	51.31	71.99	59.71	61.25	59.49	43.07	60.62	46.51	78.81	46.6	75.53	47.74	63.37	49.35	77.09	63	63.94	59.84	77.04	49.92	78.65	50.12	42.71	57.71	46.1
84766	CRACR2A	13.12	8.88	8.79	8.06	4.99	6.09	4.17	9.14	20.05	3.85	7.53	5.61	8.27	25.32	9.37	10.61	18.43	15.04	6.21	14.08	13.13	5.31	4.44	15.68	4.84	25.66	5.17	4.72	3.71	4.79	34.76	25.14	3.87	33.87	5.66	17.05	5.75	5.41	4.06	7.68	20.22	6.83	13.6	9.86	25.64	6.75	6.84	8.91
10987	COPS5	39.21	65.25	35.3	32.31	48.11	57.31	39.6	78.3	39.72	37.06	54.76	38.73	32.49	71.73	39.66	32.3	31.73	31.8	32.38	37.1	35.88	46.27	29.02	24.27	41.13	41.62	34.1	83.12	39	42.02	38.2	113.92	37.32	42.6	54.01	42.11	37.35	58.42	44.5	34.26	27.97	36.58	41.72	49.53	40.95	119.04	25.01	53.75
246777	SPESP1	3.25	1.04	2.63	0.73	0.28	0.36	2.51	0.59	0.7	0	0.35	1.29	2.07	0.73	1.03	2.7	2.24	0.39	0.6	1.56	0.4	0.45	0.83	0.93	2.85	4.61	1.72	0	1.37	1.32	0	0.89	3.89	0.91	1.04	0	1.37	0	3.1	1.35	0.99	1.27	0.96	0	0.54	0	0.45	0.69
56102	PCDHGB3	8.7	3.55	7.06	8.66	7.34	9.91	11.53	3.95	9.9	16.54	6.66	13.88	13.26	17.46	15.95	4.81	7.4	11.06	13.66	8.32	34.96	27.62	24.19	8.65	11.93	4.66	20.75	1.97	5.45	18.28	3.35	8.53	11.36	30.77	5.14	9.39	11.2	4.17	14.4	15.63	20.52	12.88	9.01	9.55	9.14	4.71	32.86	13.87
899	CCNF	9.05	23.21	9.52	16.94	9.89	28.46	4.02	39.37	31.74	59.47	16.07	11.13	5.58	38.68	7.45	27.92	20.08	24.62	4.96	15.91	30.52	14.62	4.55	9.25	3.45	28.37	3.5	28.8	13.24	5.48	28.17	49.89	3.75	65.18	8.81	30.02	11.63	55.65	4.57	5.01	6.53	4.56	8.29	23.34	5.94	24.75	5.92	21.08
80228	ORAI2	80.47	116.56	83.02	120.58	73.86	113.03	65.12	74.58	109.55	91.22	133.79	146.49	117.76	73.72	126.81	120.57	172.44	135.52	65.98	88.27	157.14	138.05	124.71	174.73	64.88	172.75	135.48	163.31	119.43	129.51	232.32	86.06	77.47	155.59	100.06	109	145.61	136.9	63.75	109.66	164.72	76.54	102.69	74.46	85.62	159.09	150.6	97.81
28982	FLVCR1	20.65	32.58	20.59	27.05	18.99	26.32	16.57	24.36	31.94	31.32	29.89	34.03	26.68	23.07	24.56	24.2	36.81	34.91	15.51	19.86	35.88	39.6	28.88	33.05	18.05	41.49	28.69	41.44	25.7	27.94	40.41	27.58	17.64	56.26	27.02	25.04	35.49	36.9	14.18	24.74	38.34	21.98	24.75	16.33	19.24	50.82	37.23	25.79
165140	OXER1	8.74	5.57	7.4	3.48	4.01	6.24	7.7	1.41	6.39	5.54	6.69	8.83	5.58	3.48	8.56	3.36	7.46	4.63	7.38	4.21	5.35	4.61	9.9	6.25	4.06	6.2	4.76	4.88	6.76	4.86	8.2	2.58	5.88	16.22	7.14	1.78	3.62	0.93	5.4	4.98	13.8	5.02	6.32	2.18	6.21	9.74	6.42	1.91
10180	RBM6	82.18	68.64	56.5	104.07	58.58	60.14	69.85	44.99	88.12	61.09	65.51	92.92	97.3	31.03	77.42	54.46	95.54	73.61	66.66	72.12	102.35	76.91	127.11	150.67	77.59	99.86	109.72	95.49	58.84	90.9	140.25	55.66	84.35	77.13	85.26	32.06	127.18	75.33	62.59	115.27	150.25	65.05	108.75	45.63	82.12	142.29	92.08	62.77
3615	IMPDH2	123.38	176.3	160.83	104.01	129.72	73.44	83.85	104.51	149.94	171.1	161.38	100.85	81.99	136.89	106.95	68.33	86.95	119.99	94.66	107.58	82.12	85.95	76.93	87.54	73.9	129.25	82.07	167.7	178.16	95.44	114.7	148.88	80.28	137.28	112.09	81.19	72.4	72.73	97.2	86.61	76.74	86.78	84.9	125.33	107.04	283.02	70.11	118.77
642515	PRRT1B	4.13	3.29	3.64	2.4	2.72	3.85	3.09	3.81	5.71	4.51	4.05	3.53	1.96	3.48	6.74	3.18	7.13	4.95	3.72	1.86	5.5	6.22	4.04	4.8	2.29	3.54	7.16	7.79	3.23	4.3	20.54	0.86	2.13	6.63	3.61	5.43	3.78	3.29	2.35	3.45	8.69	2.87	9.71	2.18	2.63	8.25	6.26	3.66
5462	POU5F1B	1.08	4.01	1.51	2.16	1.37	0	0.24	0.68	3.95	0	1.35	1.2	2.19	2.97	1.7	0.3	2.27	2.09	0	0.41	2.43	4.22	2.39	2.52	0.62	2.33	0	1.34	0.42	1.2	3.11	1.68	2.11	2.76	0	1.06	1.06	1.46	0.97	2.66	1.49	0.45	2.19	0.93	2.86	13.57	1.28	2.67
148523	CIART	5.14	5.18	9.74	12.66	16.61	10.83	34.76	14.41	4.55	8.51	8.5	20.35	8.56	17.51	18.8	6.7	7.62	3.81	34.78	15.96	9.7	9.68	34.18	1.77	28.58	4.69	20.2	13.93	12.27	25.89	2.93	7.92	20.68	12.24	11.48	20.07	4.07	4.94	22.17	13.19	27.58	14.12	6.91	4.5	11.56	11.73	14.91	4.13
51603	EEF1AKNMT	16.48	20.13	13.64	19.19	16.81	19.82	15.68	23.31	38.6	61.66	15.15	17.36	11.19	24.68	13.59	16.08	18.34	18	15.73	21.85	20.53	16.84	12.1	11.97	17.71	18.84	13.23	19.48	12.84	17.96	21.9	30.56	13.63	22.34	12.22	18.4	10.99	31.08	14.6	12.56	15.14	17.21	15.97	22.32	15.13	67.89	13.55	17.69
3814	KISS1	0	0.76	0	0.75	0	0	0	0	1.43	0	0	0	0	1.2	0	0	0	0	0	0	0	0	0	0	0	0	0	0.84	0	0	0	0	0.72	0	0	0	0	0	0	0	0	0	0.65	0	0	0	0	0
129880	BBS5	207.47	379.59	184.81	315.11	189.79	246.82	163.63	213.39	309.55	354.54	296.85	330.19	241.16	431.72	293.8	316.25	432.18	462.14	178.02	173.84	410.47	297.69	284.06	369.86	168.45	597.16	265.58	429.19	260.77	256.2	326.35	547.8	166.06	742.92	238.26	501.15	381.12	541.83	129.94	242.95	415.11	178.84	253.19	189.7	153.67	402.9	293.35	383.08
286183	NKAIN3	50.8	66.14	38.03	50.71	36.45	56.62	33.62	36.88	56.91	45.84	54.16	71.03	64.27	46.46	65.98	56.32	83.33	61.01	35.43	42.33	80.17	88.91	71.26	81.28	44.23	74.3	72.17	73.67	49.95	77.37	84.98	54.56	53.33	96.87	53.67	43.09	72.82	76.4	37.26	62.12	76.1	40.63	48.64	34.44	39.71	88.51	80.34	56.74
7043	TGFB3	20.38	21.39	23.09	54.97	15.73	110.76	43.89	32.62	31.21	20.79	13.8	32.96	67.1	40.87	30.15	106.63	22.91	50.15	38.87	56.46	19.37	72.09	37.95	83.68	43.44	41.42	35.89	16.88	12.45	47.77	16.97	12.97	33.26	20.05	33.14	26.11	22.57	27.77	45.16	59.86	26.67	39.28	16.47	31.28	59.42	12.28	66.85	12.4
9582	APOBEC3B	13.86	49.22	5.74	19.26	5.85	52.23	1.19	33.24	48.84	84.4	9.24	9.96	4.21	22.18	3.66	7.81	9.01	17.15	3.96	13.58	16.26	8.72	1.15	4.97	3.28	18.06	0.54	16.81	2.25	2.48	4.79	46.28	2.89	12.1	12.2	41.9	3.54	26.23	0.3	1	1.62	1.64	1.57	20.65	1.79	4.65	2.57	5.7
84502	JPH4	1.25	0.6	1.88	2.48	1	0.58	4.65	0.57	1.36	0.49	1.13	2.76	3.07	0.28	1.93	0.74	0.87	1.88	6.48	5.94	0.26	1.15	3.76	2.39	2.78	0.59	4.28	0.4	1.21	1.69	2.53	10.31	4.32	16.12	1.56	0	0.74	0.38	3.59	2.89	2.24	2.65	1.13	0	2.62	0.42	2.18	0
343172	OR2T8	0.49	1.13	0	0	0	0	0	0	0	0	0.28	0	0	0	0	0	0	0	0.12	0.48	0	0	0	0.71	0	0	0	0	0	0.17	0	0	0.54	0	0	0	0	0	0	0	0	0	0	1.05	0.47	0	0	0.27
1455	CSNK1G2	63	96.24	83.26	94.1	73.79	110.14	56.53	118.77	113.78	147.79	90.64	87.46	63.69	125.27	63.66	72.26	96.57	101.7	64.04	95.3	112.7	64.91	62.31	104.16	56.15	156.49	57.27	118.17	71.4	63.03	133.6	133.34	53.7	121.62	117.22	65.53	98.79	137.46	61.92	79.61	99.8	67.38	97.7	76.89	72.76	105.82	77.04	122.95
94059	LENG9	19.83	22.36	16.66	19.15	14.91	17.27	14.7	16.34	18.57	10.52	17.68	18.64	16.59	20.46	18.2	11.77	18.88	18.26	22.62	15.49	17.78	13.96	19.51	21.44	11.3	20.63	24.47	22.86	11.35	14.28	24.45	26.19	12	9.89	16.01	14.04	14.3	11.71	12.83	12.82	23.06	11.4	21.02	11.71	12.12	16.98	15.91	19.47
105371095	LOC105371095	5.7	1.1	0.08	1.94	1.14	1.31	2.69	0.16	1.63	7.16	2.22	3.11	3.88	3.65	3.53	2.21	3.82	0.11	0	1.31	2.75	1.52	2.19	0.64	0.91	4.37	3.94	4.22	0.1	0.13	1.33	1.23	1	9.23	0	1.21	0.16	0.95	1.85	0.11	3.8	2.34	0.1	1.03	2.39	1.58	0.31	2.9
80349	WDR61	24.29	25.42	31.27	28.13	33.74	39.89	26.61	39.36	26.35	40.17	25.36	22.5	30.75	25.39	35.4	26.81	23.01	27.46	27.5	25.46	22.9	24.31	25.62	21.26	22.41	14.13	25.47	40.59	23.53	31.36	64.41	14.81	34.91	30.9	23.19	30.9	23.03	33.69	27.21	21.61	25.51	18.79	17.57	17.61	26.81	24.11	25.13	31.18
114991	ZNF618	13.08	11.1	9.85	13.97	7.28	18.55	6.61	12.64	11.52	13.2	7.44	9.28	10.45	17.88	8.36	11.49	9.86	12.87	7.44	8.64	7.19	16	6.32	11.15	9.54	6.29	7.9	9.42	7.32	7.53	6.46	5.54	8.22	44.64	4.91	15.96	3.56	10.84	5.93	5.51	9.19	6.11	12.72	8.23	12.87	6.86	8.26	4.56
401541	CENPP	12.1	20.25	12.03	18.16	18.16	35.33	6.73	21.89	17.07	27.1	21.28	14.13	8.43	11.73	10.22	25.19	16.86	14.35	5.41	8.29	30.5	19.74	6.45	11.49	8.29	18.14	8.92	27.65	16.41	12.02	12.93	36.95	11.41	15.46	20.71	21.91	25.75	42.09	6.19	7.25	13.98	5.22	15.5	23.39	8.66	19.98	7.68	29.91
55004	LAMTOR1	79.2	90.79	98	93.26	90.76	107.52	82.28	614.87	272.93	396.3	182.3	77.21	78.45	411.69	96.69	162.48	134.63	77.77	81.95	106.94	85.02	88.78	59.81	69.73	92.79	94.41	66.64	72.87	91.73	79.59	80.45	71.59	70.11	64.75	52.98	42.28	57.93	39.37	71.96	76.87	49.45	96	75.04	188.06	81.83	44.14	72.9	128
828	CAPS	19.83	16.54	17.68	14.04	11.81	7.19	9.44	13.99	17.6	14.68	12.52	17.99	9.83	48.38	15.34	9.48	12.87	14.28	16.99	15.4	14.13	19.19	19	22.88	13.9	25.71	16.44	17.6	18.27	19.21	34.07	11.9	9.67	12.21	23.42	6.08	24.67	17.82	10.75	18.86	26.62	17.93	47.71	6.92	19.73	23.64	23.01	10.92
79101	TAF1D	26.84	38.77	26.51	52.47	24.65	38.08	13.45	41.45	57.76	48.37	33.91	26.1	13.51	37.67	21.63	26.99	31.15	28.49	13.91	30.3	60.36	47.58	18.63	41.05	26.03	90.62	16.77	51.05	26.92	16.55	43.98	44.49	39.4	42	58.91	35.42	51	30.91	15.37	52.62	41.11	26.51	40.26	96.42	31.99	57.25	32.83	61.87
3897	L1CAM	16.8	1.72	13.61	44.23	6.25	3.24	78.53	5.94	8.12	1.58	6.07	59.69	34.75	6.34	40.13	7.71	9.02	10.6	85.47	39.75	9.14	24.27	83.47	5.98	82.73	1.26	84.96	1.8	9.35	34.37	5.37	0.32	50.01	3.37	22.37	6.53	8.9	1.5	73.38	40.89	28.27	95.86	5.42	3.59	20.13	4.81	45.4	2.78
5066	PAM	100.58	55.76	53.48	94.77	29.49	70.24	163.12	41.12	78.74	59.74	34.41	98.88	134.36	69.43	120.84	88.93	61.73	63.39	107.85	92.39	22.18	92.23	125.96	92.6	128.53	40.93	170.25	44.41	30.39	105.86	27.94	32.93	139.57	84.14	60.08	82.84	41.13	44.65	127.52	114.76	122.86	160.43	54.14	76.63	151.74	98.11	92.29	36.15
64708	COPS7B	31.91	40.71	26.5	41.6	26.15	40.12	27.19	38.61	35.55	37.94	41.12	40.03	24.2	31.36	31.05	32.78	48.2	42.69	34.78	29.18	46.1	45.2	34.42	37	29.36	48.32	38.05	24.99	36.74	41.35	58.17	23.57	32.24	84.97	37.19	22.48	38.94	88.73	29.91	37.09	44.89	29.21	35.87	28.37	22.51	30.66	41.87	25.11
5557	PRIM1	8.01	15.72	5.48	6.88	9.46	19.82	4.03	19.38	20.8	36.63	7.65	6.78	6.14	18.52	5.93	10.66	15.51	9.62	5.34	7.72	13.73	15.47	2.88	5.51	4.43	20.48	4.66	20.68	7.08	6.07	14.22	29.29	8.73	34.62	5.83	11.11	4.97	15.09	3.37	2.22	6.02	3.45	6	15.66	8.05	13.88	2.22	11.26
92291	CAPN13	0.47	9.83	0.91	1.71	2.09	0.3	0	7.95	1.28	1.24	20	3.13	0.64	2.54	1	0.67	2.6	0	0.15	0	4.93	16.88	0.2	1.53	0.3	88.33	0.22	0.9	2.88	0.23	0	4.67	0	28.1	7.65	3.94	8.67	0.28	0.16	0.33	3.04	0.3	23	0	1.13	0.91	0.42	10.15
4340	MOG	73.94	105.11	68	87.05	60.54	97.79	58.85	58.71	85.88	78.24	122.8	139.83	114.45	72.54	109.49	112.89	152.48	106.91	50.21	62.56	116.65	141.84	119.68	137.07	59.8	180.6	122.68	160.6	104.04	118.99	181.83	86.77	70.2	149.86	94.56	90.26	139.03	110.13	57.91	79.22	154.61	63.06	92.42	68.28	63.03	148.18	146.56	76.38
9536	PTGES	31.99	38.84	24.65	38.52	20.82	59.34	20.26	22.74	36.07	27.44	25.15	35.35	25.77	42.41	29.85	27.45	51.11	43.14	15.39	22.28	35.17	52.32	21.27	40.1	14.02	41.85	38.37	53.16	15.06	33.75	32.96	80.54	23.1	28.89	21.93	20.58	31.68	114.35	12.35	34.87	33.59	14.22	14.11	34.21	69.06	22.39	31.04	27.24
101929738	LOC101929738	11.61	15.47	12.01	21.74	10.97	19.62	10.02	15.69	13.07	15.29	14.88	17.23	14.33	21.83	19.59	14.35	18.78	19.47	9.98	14.66	16.53	20.66	10.23	18.23	9.91	40.64	29.09	30.69	16.97	20.74	39.19	9.05	7.27	20.68	6.67	9.47	15.42	15.69	4.89	17.8	17.38	6.11	14.19	6.1	7.84	19.57	18.42	6.69
3872	KRT17	225.78	829.26	59.88	4599.18	306.26	1209.8	8.62	482.55	2120.25	3560.53	158.01	1067.81	88.16	5181.95	101.93	7582.59	2013.29	1265.25	46.22	617.64	6668.21	589.98	17.65	42.6	13.62	3370.39	30.08	2220.02	141.31	59.39	2.91	527.18	50.57	2431.18	224.23	9507.25	103.02	3697.65	2.58	199.31	290.46	81.55	150.98	17861.5	89.56	1170.87	43.15	7818.27
27034	ACAD8	12.6	29.15	21.89	17.48	17.74	10.93	15.04	12.44	12.32	10.45	17.92	16.51	12.44	9.09	13.11	11.29	11.28	14.59	16.92	18.33	16.96	16.21	15.32	21.75	15.51	15.36	22.51	15.08	20.88	22.72	24.35	9.29	15.93	21.49	15.26	9.03	22.65	8.14	18.5	15.12	17.03	17.37	19.48	11.54	19.79	18.59	21.73	19.21
10525	HYOU1	44.72	104.08	59.96	75.17	59.97	95.79	41.02	112.34	85.44	94.36	68.44	73.82	49.44	87.42	51.4	62.72	66.77	103.55	51.77	100.95	57.67	59.04	43.26	60.21	59.43	96.44	50.25	76.36	43.01	45.14	73.57	57.79	37.98	99.96	50.63	91.65	46.55	43.59	56.57	72.13	59.42	69.02	42.22	50.31	42.22	53.67	59	62.95
10165	SLC25A13	20.94	20.5	17.76	23.85	17.97	20.21	9.96	26.71	26.97	25.68	25.11	14.91	17.65	16.95	19.25	25.18	31.42	37.22	11.93	24.94	20.72	16.55	17.48	24.61	15.06	27.63	14.24	35.82	18.99	16.26	14.85	29.49	14.25	21.02	14.74	23.5	18.14	44.86	14.71	18.02	21.33	16.08	20.77	20.29	14.7	37.89	18.06	21.38
79582	SPAG16	34.87	28.27	29.71	34.21	36.78	30.94	22.2	39.49	27.25	17.18	38.77	34.81	29.67	22.53	37.79	27.86	38.14	34.24	33.83	19.86	28.01	29.79	27.2	36.28	25.49	36.59	31.31	29.09	42.13	39.5	38.91	24.87	35.16	56.59	25.14	21.81	43.72	35.42	29.56	25.77	33.28	22.85	38.31	18.5	26.22	31.15	33.28	21.81
121340	SP7	0.15	0	0.67	0	0	0	0.14	0.14	0.16	0.28	0	0.19	0	0	0.37	0	0.21	0.18	0.26	0.14	0	0	0.19	0	0.15	0.21	0.2	0.76	0.15	0.2	0.83	0	0.16	0.21	0.16	0.21	0	0	0.14	0.21	0.19	0.41	0.14	0.32	0	0	0.41	0
122748	OR11H6	0.47	0	0	0	0	0	0	0	0	0	0	0	0	0	0	0	0	0	0.43	0	0	0	0	0	0	0	0	0	0	0	0	0.85	0	0	0	0	0	0	0	0	0	0	0	0	0	0	0	0
92170	MTG1	22.45	27.38	22.8	20.49	23.89	32.27	10.72	22.23	38.52	50.24	31.7	25.34	15.84	26.86	22.39	20.46	36.62	33.21	18.12	21.13	37.86	23.76	17.42	26.72	14.17	32.61	20.88	30.05	22.37	19.05	36.55	35.42	17.48	40.64	25.12	33.47	35.52	24.73	12.96	17.54	36.08	15.81	34.17	24.68	19.16	57.94	22.83	30.69
55002	TMCO3	69.62	83.16	60.91	92.46	55.76	115.65	66.29	56.26	86.24	93.55	83.83	94.68	82.48	82.88	102.16	97.06	93.94	96.56	78.52	72.87	105.28	96.31	96.18	125.97	63.17	105.13	102.35	100.48	71.71	104.47	99.88	59.48	76.66	113.98	77.72	78.36	89.82	146.55	60.03	97.09	122.26	83.73	82.18	82.59	87.74	81.99	124.61	70.96
246	ALOX15	3.02	39.61	2.54	0.84	2.58	1.84	1.23	10.11	13.56	11.1	9.06	4.37	1.18	7.07	1.92	2.68	3.6	2.52	1.64	1.45	3.23	2.31	1.91	5.98	0.82	3.12	4.08	14.53	4.64	2.39	5.97	5.38	2.09	1.84	5.3	4.59	6.76	2.75	1.24	1.87	2.59	1.12	2.91	0	2.8	10.62	2.56	6.91
2678	GGT1	11	7.64	6.75	7.82	4.79	7.68	5.48	3.79	10	8.08	7.6	7.47	5.17	9.17	7.62	5.48	7.06	15.07	4.92	4.5	7.51	3.88	5.57	7.02	4.62	12.62	5.16	23.74	6.91	3.01	9.29	6.73	3.66	4.49	6.37	7.04	6.71	2.81	4.12	4.17	8.62	3.67	9.96	1.84	7.77	40.24	5.21	2.33
64332	NFKBIZ	73.28	89.87	67.9	116.17	71.25	101.45	143.55	73.02	211.56	203.56	85.53	150.4	192.53	70.93	129.54	165.3	118.81	103.63	145.82	91.34	122.58	145.81	303.28	167.4	111.56	102.96	111.7	198.3	75.27	87.86	75.5	49.42	111.73	60.12	126.74	121.93	114.13	81.35	126.14	107.34	107.79	77.68	87.54	83.75	113.46	45.67	142.8	171.57
121129	OR2AP1	0	0	0	0	0	0	0	0	0	0	0	0	0	0	0	0	0	0	0	0	0	0	0	0.72	0	0	0	0	0	0.68	0	0	0	0	0	0	0	0	0	0	0	0	0	0	0	0	0	0
140880	CST11	0	0	0	0	0	0	0	0	0	0	1.13	0	0	0	0	0	0	0	0.97	0	1.28	2.88	0	0	0	0	0	0	0	0	0	1.53	0	0	0	0	1.47	0	0	0	0	0	0	0	0	0	0	0
80209	PROSER1	14.82	20.31	15.4	16.38	14.46	23.46	11.88	19.4	23.76	19.41	18.33	21.72	11.9	46.25	18.07	23.75	24.93	20.82	9.2	24.89	19.73	19.69	14.1	20.15	13.33	24.38	10.6	19.96	16.68	13.31	36.03	21.48	12.25	28.4	14.04	14.62	16.1	29.21	9.91	13.67	14.62	13.11	13.9	23.91	14.76	18.87	15.13	14.84
998	CDC42	124.48	146.02	116.78	116.66	130.75	144.54	104.81	179.77	112.9	101.34	119.65	116.63	124.75	122.58	112.99	131.61	135.86	147.83	113.83	127.91	142.96	153.36	98.06	121.85	106.5	130.42	128.26	157.92	124.84	121.31	144.51	204.25	132.57	86.78	117.72	119.22	121.62	127.58	125.5	78.83	96.94	122.5	107.72	127.86	100.72	140.39	97.96	127.42
388419	BTBD17	0.36	0	0.96	0.4	0	0.87	0.17	0.49	0.19	0	0.39	0.24	1.11	1.61	1.92	0.31	0	1.58	0	0.86	0	0.36	1.36	0.77	0.52	1.73	1.18	0	0.19	0.24	0.36	0	0.29	0	0	0.74	0.25	0	0.75	0.49	0.35	0	0	0.38	0.34	0.36	0.49	0.28
389125	MUSTN1	106.44	18.6	54.52	30.84	26.6	10.86	14.16	6.9	41.64	18.91	29.86	28.97	57.43	0	143.34	4.47	26.61	7.46	51.06	27.03	22.46	22.34	23.73	69.82	15.27	1.98	30.48	10.39	14.59	36.03	19.39	0	30.95	6.96	36.31	1.51	35.77	3.08	6.19	19.51	24.05	7.57	30.05	8.16	142.81	14.76	65.66	4.77
85366	MYLK2	0	0	0	0.18	0	0.88	0.31	0.44	0.17	1.5	0	0.42	0	0.72	12.85	0.76	0.66	0.38	0.15	0.93	0.78	0	0.21	0.23	0.16	0.23	0.64	1.01	0.17	0	0.89	0.88	0	0.45	0	0.44	0	0.19	0	0.22	0.21	0.47	0.63	0	0.46	3.25	0	0.17
51412	ACTL6B	0	0.34	0	0	0	0	0	0	0.97	0.28	0.65	0	0	0.27	0	0	0	0	1.11	0	0	0	0	0	0	0	0	0.38	0	0	0	0	0.33	0.42	0	0	0	0	0	0.41	0.4	0.29	0.29	0	0	0	0	0
7570	ZNF22	14.37	11.74	10.62	19.37	12.46	18.46	17.62	38.11	19.01	19.48	12.32	16.71	15.34	30.39	14.29	16.3	24.01	15.19	19.66	26.66	5.77	18.63	12.94	16.88	21.38	10.66	16.73	13.84	7.89	24.06	20.81	29.98	21.49	46.62	11.24	17.54	8.77	8.54	18.83	16.93	11.8	19.27	11.82	15.49	11.81	8.42	14.59	10.5
56623	INPP5E	20.28	18.3	21.32	21.72	16.79	34.37	24.9	31.25	26.87	42.26	19.86	27.48	23.1	33.89	21.01	20.99	21.17	21.21	29.91	25.21	33.3	33.94	29.06	27.73	21.83	20.11	30.95	20.4	18.03	25.31	29.76	22.66	17.11	26.62	20.97	26.31	29.78	27.31	23.61	22.66	35.98	16.75	23.45	18.63	20.38	33.52	29.15	20.34
4677	NARS1	58.67	69.2	62.56	60.53	63.32	76.69	72.14	135.44	60.77	49.45	71.18	83.35	54.78	81.76	70.31	63.52	76.22	53.18	84.87	86.8	65.71	60.51	70.2	49.25	91.04	73.88	72.25	113.64	55.23	83.59	60.61	146.78	73.86	60.99	83.71	53.46	65.39	66.82	89.64	71.39	59.99	81.03	60.28	52.26	59.85	58.89	62.51	98.55
1457	CSNK2A1	39.57	55.77	43.39	32.02	38.27	35.8	23.42	77.56	48.46	57.08	51.41	44.63	37.55	76.04	37.14	46.27	49.27	50.56	33.92	39.59	53.07	49.26	38.33	38.72	33.71	55.44	42.25	74.48	36.31	42.49	44.34	64.04	30.72	71.32	34.38	48.93	42.17	67.19	32.51	26.06	41.1	32.54	37.2	36.26	29.79	64.93	36.23	42.3
23460	ABCA6	64.77	24.27	20.82	17.71	17.6	22.85	54.4	17.35	28.12	13.95	28.32	58.8	60.13	12.22	73.58	31.15	35.35	23.55	38.8	40.88	23.56	37.44	54.4	76.95	53.08	23.85	85.2	22.05	25.8	60.04	39.43	12.16	69.03	21.29	21.97	13.45	36.13	15.29	40.2	47.16	46.51	35.49	25.23	7.76	64.5	26.78	54.6	15.66
161823	ADAL	12.64	8.17	5.62	7.5	7.13	14.76	8.54	9.76	8.38	10.4	9.7	12.38	8.58	6.85	11.25	6.86	12.75	12.08	12.07	10	7.18	8.62	12.66	16.94	13.62	8.61	11.39	15.77	4.76	12.51	8.71	8.36	13.12	6.77	7.7	7.82	5.87	9.77	6.84	10.6	8.69	11.72	6.1	4.06	19.5	8.28	10.28	10.32
79609	VCPKMT	24.08	53	24.17	33.73	28.19	38.28	20.79	23.71	37.74	31.47	37.13	43.74	30.94	26.86	43.28	38.01	50.15	37.74	21.41	27.69	56.09	52.63	40.22	39.23	20.26	59.23	45.02	56.24	36.39	35.77	61.97	30.2	25.17	53.54	35.48	36.98	41.13	42.93	17.61	29.85	50.88	22.17	32.06	32.34	31.17	57.55	56.98	30.36
84807	NFKBID	62.72	75.22	56.79	60.99	44.23	67.14	80.18	37.22	70.49	54.04	70.72	78.76	119.35	61.09	71.43	65.04	97.19	89.97	51.58	65.07	93.09	91.03	70.94	143.92	60.4	100.17	111.53	99.41	65.13	78.42	166.21	59.9	66.9	87.81	75.06	64.82	77.86	72.68	55.64	77	97.69	57.15	61.2	54.76	108.24	94.63	93.5	60.02
54020	SLC37A1	25.24	22.5	27.34	12.76	32.08	16.92	8.17	39.35	14.97	13.63	30.53	18.22	15.3	36.73	25.56	6.93	24.17	18.6	9.05	23.25	16.08	13.29	12.6	21.21	11.57	22.02	11.48	17.58	30.39	9.64	34.4	20.06	16.3	11.22	27.75	10.2	52.48	3.32	9.28	11.8	20.89	15.48	48.22	10.76	20.01	9.39	12.4	15.05
89853	MVB12B	25.58	13.47	26.16	28.5	20.36	15.57	24.18	29.45	21.23	12.1	17.51	39.49	33.23	9.82	25.71	12.61	21.25	18.68	33.43	33.39	17.63	26.15	40.27	27.82	37.41	20.5	41.6	19.15	19.47	36.84	27.05	10.71	31.26	75.02	13.63	12.94	15.69	7.33	27.78	23.89	30.73	29.06	18.5	7	25.68	12.33	38.87	13.95
7299	TYR	0	0	0	0.26	0	0	0.21	0	0	0.84	0	0	0.6	0	0	0.8	0.32	0.79	0.2	0	0	0.6	0.28	0	0	0	0	0.83	0	0	0	0	0	0	0	0	0.33	0	0.22	0.3	0	0.23	0	0	0	0.32	0	0
91408	BTF3L4	24.45	31.22	21.35	27.97	21.49	31.67	20.09	44.52	24.96	23.52	29.17	22.86	23.4	34.73	23.62	27.59	36.33	29.79	21.29	32.74	29.64	38.2	19.87	19.51	26.39	27.64	21.01	45.55	23.09	27.38	21.77	42.57	21.94	31.29	25.44	20.56	17.53	20.13	24.99	22.71	20.99	28.12	20.08	26.26	20.75	33.66	26.72	31.73
728489	DNLZ	5.2	4.45	3.51	6.86	2.88	5.43	7.13	5.83	5	7.18	4.39	6.11	7.2	22.31	5.71	6.18	7.39	6.94	5.35	5.15	4.42	4.39	5.57	5.17	7.7	12.93	5.54	10.24	1.82	4.1	6.41	4.62	2.68	4.05	3.71	4.81	5.1	6.46	5.52	3.4	5.43	5.51	3.41	4.3	13.55	14.67	4.82	4.62
401562	LCNL1	2.71	0.56	3.99	1.39	2.57	0.54	0.24	0.45	2.4	0.69	4.01	0.33	0.31	0.22	2.74	1.17	2.38	1.78	0.68	2.38	5.43	1.36	2.22	16.58	0	0.7	0.65	0.62	3.63	1	6.49	0.23	1.34	0	0	0.34	1.04	0	0.47	0.68	0.99	0	1.7	0	1.43	0.67	0.68	0.26
729447	GAGE2A	0	4.42	0	0	0	0	0	0	0	0	0	0	0	0	0	0	21.58	35.19	0	0	0	0	0	0	0	0	1.18	0	0	0	0	487.6	0	0	0	0	0	0	1.75	3.17	0	0.31	0	0	0	0	0	0
65987	KCTD14	0	0	0	1.17	0	0	0	0	0	0	0	0	0	0	0	0	0	0	0	0	0	0	0	0	0	0	0	0	0	0	0	0	0	8.68	0	0	0	0	0	0	0	0	0	0	0	0	0	0
4762	NEUROG1	0	0	0	0	0	0	0	0	0	0	0	0	0	0	0	0	0.37	0	0	0.26	0	0	0	0	0	0	0	0	0	0	0	0	0	0	0	0	0	0	0	0	0	0	0	0	0	0	0	0
8370	H4C14	51.4	159.21	68.57	54.47	85.89	79.86	26.38	287.18	179.1	175.96	139.03	71.26	23.51	185.03	46.99	73.21	153.5	166.82	39.37	99.08	84.68	112.03	25.25	30.89	29.44	95.52	31.05	180.66	85.41	30.03	144.32	162.36	47.69	239.49	55.65	112.63	45.67	158.59	29.08	33.41	46.85	52.71	24.36	145.62	46.6	164.93	19.38	55.38
8314	BAP1	55.63	80.86	56.63	79.4	58.97	61.13	56.4	76.66	58.14	59.83	56.14	60.55	49.17	62.7	57.63	49.5	54.51	71.72	53.06	69.35	53.23	43.56	49.21	47.6	54.43	62.75	54.92	54.02	58.82	54.77	53.75	53.51	53.97	99.42	64.65	58.5	57.25	84.15	61.17	56.61	68.62	66.12	50.85	57.98	51.12	65.7	63.8	63.98
79689	STEAP4	32.67	17.59	29.63	22.16	16.91	19.48	32.14	8.58	43.23	15.26	20.54	39.87	54.13	6.78	40.18	22.97	42.74	25.4	26.11	44.73	73.91	49.56	26.48	61.12	48.86	14.11	49.64	18.23	20.76	45.91	22.32	12.83	41.21	15.4	26.48	9.92	26.44	13.63	57.35	44.19	31.43	45.23	21.54	6.79	73.03	13.17	34.53	26.89
575	ADGRB1	2.5	3.51	3.19	13.44	2.18	1.55	1.41	0.78	3.24	2.26	2.92	1.83	0.68	7.51	2.89	6.07	1.94	2.05	1.64	2.41	7.58	17.63	3.01	2.85	5.89	6.05	2.34	1.94	1.7	1.2	4.45	1.27	1.45	26.75	3.55	8.42	3.43	2.7	1.2	0.92	9.01	4.27	4.68	1.81	2.06	1.3	1.54	7.51
2798	GNRHR	1.22	2.15	1.1	0.8	1.64	1.72	0.75	0.71	0.98	0.62	2.17	3.23	2.13	1.28	1.1	1.71	4.45	3.86	0.82	0.68	2.23	2.65	0.39	1.43	1.21	1.29	1.07	1.4	1.75	1.8	3.39	1.2	2.3	0.93	1.08	2.95	2.82	1.07	1.16	1.54	2.38	0.98	1.2	1.65	3.22	2.7	2.25	1.65
1365	CLDN3	6.53	2.22	3.29	0	2.23	0.79	0	4.02	9.39	3.05	1.97	1.45	4.13	2.33	14.69	1.29	9.14	5.74	1	2.43	1.78	0.99	1.38	2.57	0	1.53	1.43	5.08	3.45	1.94	4.49	38.03	0.8	1.54	3.12	2.05	2.56	2.65	0	1.49	24.54	0	6.11	0	18	8.87	1.5	3.08
57505	AARS2	47.09	53.66	47.16	66.21	42.7	69.35	36.48	42.87	53.02	52.52	74.59	66.68	53.63	45.23	63.22	51.61	69.61	65.12	41.56	36.28	77.48	63.69	54.61	81.14	39.09	87.17	59.93	68.03	72.14	61.34	84.77	67.19	42.85	92.95	62.48	60.18	88.16	74.01	35.82	57.38	88.23	42.9	65.94	36.56	51.06	92	69.93	55.06
56140	PCDHA8	0.61	0	0.39	1.62	0.19	0	0.38	0.25	0.62	0.34	0.25	0.84	0.56	0	0.31	0.22	0.27	0.57	1.43	0.31	0.27	0.43	0.7	0.27	0	0	0	3.57	0.36	2	0.26	0	0	0	0.2	0	1.35	0.77	0.38	0.71	2.2	0.87	2.54	0.39	0.81	2.04	0.56	0
149951	COMMD7	50.26	70.42	42.07	56.79	43.69	52.39	55.62	120.48	51.63	53.32	37.52	55.65	53.6	85.31	50.67	35.05	53.19	47.57	63.19	69.55	26.68	57.32	57.73	45.89	48.2	33.05	56.9	28.74	30.03	69.33	43.18	42.12	44.67	48.53	33.95	42.9	27.46	25.88	57.9	38.25	35.67	56.37	28.32	40.14	48.05	86.86	52.28	20.9
107986908	LOC107986908	0.89	5.65	0.75	0.55	1.27	2	0.6	0.89	1.12	1.42	1.55	2.17	0.81	1.25	1.9	1.66	1.49	2.36	0.45	1.56	1.86	2.11	2.02	2.23	1.06	2.22	2.21	3.49	1.99	3.56	3.76	0.99	1.49	1.26	2	1.28	1.28	1.36	1.03	1.41	1.44	1.09	0.45	0.32	0.86	2.32	0.76	2.28
3067	HDC	29.39	6.74	9.89	11.59	9.1	19.56	31.64	2.55	16.81	3.96	11.99	25.65	36.62	2.38	32.08	21.57	19.52	13	10.36	22.01	15.24	12.88	32.68	38.35	12.39	6.12	19.42	3.91	10.32	13.98	4.15	1.28	30.49	4.74	11.31	2.05	24.99	1.23	22.48	29.14	17.97	13.22	16.89	1.66	34.46	1.99	29.42	6.92
55	ACP3	48.41	14.12	63.08	12.57	80.37	10.04	2.56	34.92	18.35	15.4	51.61	19.83	4.5	21.27	36.6	11.77	11.08	14.91	1.55	7.79	17.04	15.44	5.7	5.32	5.33	9.08	4.83	13.11	68	6.88	6.49	23.27	22.86	11.99	25.45	5.71	65.79	21.54	2.49	2.8	7.77	4.66	66	5.93	6.12	9.23	3.58	35.15
5428	POLG	29.22	37.73	34.42	51.31	35.94	70.81	29.22	41.62	37.77	40.53	39.88	38.76	26.31	38.66	33.59	37.46	48.83	52.2	33.08	39.06	46.8	43.49	30.8	40.69	28.05	39.5	36.26	51.03	37.18	37.11	60.23	30.82	31.61	43.09	39.17	40.38	47.13	42.65	34.87	39.38	58.03	32.17	38.28	28.92	36.93	67	39.73	53.04
440712	RHEX	12.08	12.77	3.78	0.89	2.67	6.77	10.06	3.69	7.04	1.25	1.96	6.03	8.25	7.82	11.77	3.53	4.17	2.52	4.23	7.34	4.2	10.86	6.09	3.83	2.12	2	8.08	2.73	2.07	6.44	6.43	12.67	10.29	2.37	2.78	4.23	1.17	2.67	4.52	1.74	1.89	3.46	2.25	2.51	9.94	2.55	7.41	2.05
152992	TRMT44	21.06	15.84	19.35	18.34	20.68	10.45	11.44	27.21	15.5	11.3	27.36	19.24	12.25	11.11	17.76	16.22	27.52	16.24	15.04	15.28	19.63	20.31	20.19	16.09	13.08	23.05	17.06	15.46	21.88	18.29	17.86	16.77	17.37	27.54	22.95	33.79	34.46	25.04	16.3	16.68	29.06	17.1	26.63	17.64	18.66	32.35	17.16	16.31
442361	OR2A2	0	0.55	0.44	2.19	1.26	2.14	0.47	0	0.52	1.82	0.53	0.88	0	0	0	0	2.01	0.58	1.35	0.47	2.38	2.01	0	0.69	0	0	0	0.61	1.02	0.66	0	0.44	0	0.68	0.52	1.35	0.68	1.76	0	0.67	2.6	0	1.91	0	0	9.46	0	0
6819	SULT1C2	13.25	17.02	10.8	15.93	8.53	12.9	12.13	6.4	11.7	10.05	20.22	17.88	19.15	10.12	14.6	10.43	21.64	18.22	7.22	11.11	22.22	17.63	12.76	20.68	10.01	30.64	16.22	17.01	15.29	14.99	27.16	11.06	13.68	21.95	13.23	12.48	18.82	16.16	8.6	12.86	23.83	8.83	175.2	10.27	14.39	24.76	13.76	12.92
125336	LOXHD1	0.37	0	0.5	0.42	0.4	0.76	0.22	0.23	0.45	0.86	0.17	0.11	1.97	0.97	1.05	1.92	0.69	1.05	0.23	1.38	0.99	0.93	0.78	2.4	0.9	0.35	0.72	0.34	0.62	1.05	0.74	0.52	0.27	0.35	0.66	0.62	1.85	0.75	0.79	1.71	0.91	1.83	0.24	0.26	0.97	0.45	3.47	1.13
905	CCNT2	29.61	37.17	28.35	28.06	26.3	37.92	23.02	39	46.39	48.24	31.2	35.93	25.96	21.68	30.75	31.05	49.54	37.81	24.74	35.24	46.15	49.07	30.71	49.84	28.51	57.28	37.08	56.8	30.38	39.27	51.36	40.16	33.06	66.63	41.17	33.13	43.03	45.49	26.93	34.64	45.17	30.28	37.33	26.44	32.83	66.36	38.13	40.4
253639	ZNF620	48.24	62.39	37.31	64.48	43.43	57.79	28.82	39.47	50.38	42.89	55.64	76.33	58.97	36.88	66.93	64.73	79.67	58.79	43.93	37.09	79.01	72.09	75.24	86.75	36.48	101.16	73.13	82.94	62.92	72.14	111.11	44.54	50.2	87.26	59.7	53.57	75.91	64.16	34.22	58.7	88.55	42.06	53.72	31.58	44.18	98.16	73.37	47.27
342865	VSTM2B	0.37	0	0.28	0	0.32	0	0.21	0	0	0	0	0	0.94	0	0.54	0.33	0.3	0	1.37	0	0	0	0.56	0	0.86	0	0	0	0	0.59	0	0	0	0	0	0	0	0	0.51	0	0	0	0	0	0	0	0	0
84249	PSD2	0.67	0.84	0.36	0.4	0.12	0.59	0.32	0.5	0.58	0.2	0.43	0.5	0.09	1.08	0.93	0.6	0.9	0.57	0.38	0.59	0.49	0.37	0.78	0.85	1.36	0.74	0.98	0.42	0.7	0.51	0.75	0.12	0.58	2.77	0.51	0.28	0.29	0.31	0.19	0.18	1.08	0.58	0.39	0	0.48	0.26	0.84	0.14
100127983	C8orf88	21.74	6.08	11.65	17.05	11.17	9.69	73.39	7.73	5.76	1.3	7.22	31.68	44.24	13.63	15.34	6.86	11.22	8.53	62.49	38.94	2.26	25.1	64.56	8.26	71.43	8.53	54.6	1.69	5.6	54.02	2.46	3.25	51.74	37.99	19.94	1.28	15.65	6.43	85.19	56.59	45.89	85.03	5.24	1.96	36.89	6.61	65.38	10.4
166785	MMAA	6.15	9.16	4.58	3.86	4.03	5.04	4.56	6.97	4.69	4.74	7.21	6.92	3.56	6.63	5.39	4.66	6.39	3.87	3.84	5.4	5.1	9.4	5.79	6.85	6.55	4.37	6.1	4.93	3.69	5.26	6.53	6.93	4.81	6.11	5.15	4.61	4.75	4.59	4.85	2.78	3.8	6.34	3.59	3.47	3.04	5.03	5.44	4.76
403277	OR5K3	0	0	0	0	0	0	0	0	0	0	0	0	0	0	0	0	0	0	0	0	0	0	0	0	0	0	0.64	0	0	0	0	0	0	0	0	0	0	0	0	0	0	0	0	0	0	0	0	0
10342	TFG	77.34	103.84	71.35	98.3	85.75	144.13	75.29	127.57	100.92	187.62	90.12	63.44	61.63	177.31	65.35	122.48	82.31	91.73	55.6	81.17	72.08	65.8	52.51	73.2	68.44	81.35	62.06	91.85	62.75	60.3	48.82	86.24	65.49	130.91	66.76	77.06	53.97	94.71	54.81	56.58	59.78	69.68	55	101.27	46.63	70.4	57.15	96.34
64927	TTC23	26.69	19.75	23.57	43.99	26.37	32.66	73.5	18.48	17.47	16.2	25.32	83.76	95.27	20.07	60.7	27.64	35.24	22.95	92.96	42.78	22.66	54.32	206.19	20.63	65.77	17.18	153.03	19.27	22.13	89.66	13.82	13.12	55.58	22.74	35.3	18.77	34.45	18.82	82.1	76.76	107.29	65.23	22.56	11.23	35.4	27.26	151.48	30.78
54676	GTPBP2	50.85	47.79	67.65	65.24	62.57	70.6	31.1	51.14	47.06	43.36	49.13	43.24	40.26	58.29	54.69	63.41	36.71	78.71	37.88	47.55	58.1	36.93	38.12	55	61.41	89.91	40.09	46.95	51.46	48.14	47.67	74.25	50.63	85.25	62.07	44.35	97.36	67.19	32.58	39.29	66.29	38.98	75.44	60.15	45.81	51.58	50.13	63.37
3005	H1-0	215.22	260.56	233.71	145.41	188.85	121.38	169.11	264.16	120.66	196.81	170.86	173.89	133.17	390.72	206.82	188.14	101.69	126.34	152.15	186.53	123.59	89.07	128.05	57.94	169.85	132.62	108.92	218.51	157.31	141.75	19.27	170.13	190.11	517.72	135.93	180.22	160.53	167.53	116.28	83.54	112.19	143.38	185.29	80.77	109.39	260.03	153.78	141.17
55257	MRGBP	7.01	15.24	8.51	14.17	7.63	23.56	8.19	26.57	16.39	21.22	8.48	10.98	7.7	16.33	8.65	12.77	8.33	13.5	8.3	12.88	13.96	9.89	8.58	10.73	9.01	24.06	7.97	18.76	6.85	6.61	11.07	25.91	7.45	16.68	5.4	26.43	6.43	23.61	7.15	8.35	12.25	7.32	7.38	21.46	8.66	18.53	10.86	13.01
123016	TTC8	17.9	27.5	13.47	20.58	16.9	18.06	25.22	51.27	25.82	25.51	25.4	24.44	28.63	21.61	20.98	24.34	23.83	24.91	26.51	17.04	23.62	27.57	32.76	26.61	20.8	30.29	22.95	28.05	20.18	33.26	20.63	19.47	25.06	32.33	23.17	25.54	27.2	40.23	18.48	22.07	24.5	21.13	21.23	12.24	19.17	31.23	32.24	17.55
11309	SLCO2B1	45.13	64.55	62.92	61.63	41.98	80.37	69.84	44.43	73.62	30.36	43.32	110.61	141.32	38.8	80.83	48.12	51.79	93.6	64.29	197.07	45.74	68.28	46.09	144.19	89.26	25.88	81.86	45.99	44.61	71.35	78.02	37.84	46.94	17.05	39.71	40.72	47.92	18.62	74.44	90.12	48.18	229.03	44.42	44.47	101.76	12.79	79.36	23.23
5316	PKNOX1	21.51	28.97	21.47	28.24	16.81	31.77	23.18	28.2	24.68	25.74	26.81	31.32	32.61	23.11	26.43	28.26	36.48	27.15	24.04	25.6	34.59	33.13	35.46	31.26	24.42	42.95	32.31	36.16	24.75	31.4	38.21	26.62	24.02	40.98	28.8	25.98	33.6	28.93	27.07	25.12	36.13	27.62	22.21	21.76	21.24	40.41	41.7	25.5
27033	ZBTB32	3.51	7.05	5.48	4.85	3.74	1.89	2.08	4.24	10.84	3.42	7.49	6.06	4.93	2.25	5.28	3.94	7.28	13.87	3.26	11.81	21.48	7.86	5.12	11.39	2	6.1	5.27	6.79	5.54	4.02	35.33	5.33	1.34	3.43	2.04	6.06	2.57	2.88	1.13	3.31	5.19	2.33	4.78	4.06	5.04	7.78	3.47	8.73
84259	DCUN1D5	29.38	40.11	26.79	331.95	32.21	65.44	37.57	64.54	40.24	47.57	51.43	40.49	35.93	48.7	31.18	39.29	39.56	38.48	30.53	38.33	45.93	62.31	40.12	43.54	29.97	89.55	46.95	50.49	41.43	34.2	46.88	49.07	33.47	42.16	52.16	59.03	37.17	44.05	29.57	50.83	58.16	36.55	49.93	44.22	35.65	77.4	40.12	54.18
83478	ARHGAP24	19.49	24.34	20.75	25.41	14.32	20.61	23.83	17.37	23.63	19.04	19.81	37.88	26.98	12.1	23.66	16.46	37.38	22.18	29.4	27.49	22.24	29.16	34.89	48.68	24.46	29.73	29	27.58	16.44	35.26	46	13.24	26.73	33.92	32.24	11.6	25.84	24.91	25.95	32.73	29.24	26.53	24.63	9.56	24.1	39.13	37.42	16.65
9363	RAB33A	1.76	3.61	0	2.54	2.86	5.97	3.8	3.12	3.66	1.65	3.2	1.42	0.75	1.06	0.72	1.75	3.07	7.41	2.5	4.72	5.19	3.84	0.75	4.36	2.2	1.67	1.55	4.31	1.23	1.99	14.43	1.61	2.56	0.82	0.63	0.81	0	1.42	0.56	1.49	1.45	2.01	0.97	3.74	4.88	2.38	1.63	2.09
254272	TBC1D28	0	0	0.1	0.44	0.88	0.26	0.22	0.21	0	0	0	0.31	0	0	0	0	0.18	0.61	0	0.86	0.18	0.54	0.3	0	0.11	0.16	0.87	0	0	0	0.96	0	0	0.39	0	0.16	0	0	0	0	0.19	0	0	0	0	0.16	0.36	0
5662	PSD	4.1	2.95	1.59	18.5	1.03	8.75	48.92	6.66	2.29	1.86	4.71	62.5	95.56	2.86	15.98	4.71	8.95	8.41	188.18	59.47	3.4	17.31	172.2	5.86	83.21	3.57	69.9	6.35	2.08	166.15	5.02	1.45	32.24	5	53.84	2.38	9.32	1.6	201.95	121.21	25.72	57.2	5.05	1.25	1.28	24.69	126.39	3.38
29088	MRPL15	20.19	40.96	22.43	28.32	23.15	41.07	30.66	65.98	23.25	36.84	31.84	35.33	18.42	61.94	26.53	30.41	29.35	31.79	32.92	27.49	27.92	42.6	23.23	18.02	31.05	30.15	28.77	39.71	28.02	35.09	17.81	42.64	24.68	30.52	29.18	28.97	22.66	33.23	24.02	25.43	18.65	23.05	22.97	34.53	21.02	66.8	23.92	37.67
56647	BCCIP	30.9	30.11	23.23	19.34	31.99	46.97	36.82	75.18	84.7	136.13	42.13	35.68	30.99	33.73	35.32	31.89	26.23	28.37	29.72	32.33	32.99	32.37	26.21	30.04	38.2	45.99	37.79	27.29	25.63	35.78	34.71	65.85	40.29	45.69	35.76	45.45	42.46	44.35	37.3	25	29.5	36.92	22.63	46.77	25.3	76.49	31.7	36.33
65125	WNK1	168.32	160.41	185.53	153.2	176.56	130.85	150.07	140.42	132.79	114.94	142.37	132.51	129.64	129.93	164.46	145.63	125.51	153.21	143.7	166	160.76	140.26	144.66	158.21	159.31	154.05	166.28	133.45	170.26	119.84	168.43	143.68	170.11	360.98	186.68	212.97	170.65	134.74	134.84	131.98	140.93	126.48	160.42	124.11	107.53	144.91	121.54	131.51
84988	PPP1R16A	19.01	49.04	18.73	31.09	24.47	27.42	18.02	57.25	51.85	73.71	40.63	20.78	16.42	77.28	25.08	22.77	32.76	33.77	21.29	22.96	34.7	31.24	25.9	22.17	16.88	43.15	21.94	88.25	29.76	24.59	19.83	46.27	18.2	65.49	41.42	32.54	34.84	43.27	21.16	25.77	38.86	24.07	51	21.88	15.49	93.59	23.54	36.34
124602	KIF19	2.95	0.6	1.14	2.55	0.23	0.29	1.82	0.9	1.73	0.12	1.38	4.48	3.69	1.83	3.8	0.95	1.65	0.96	1.72	3.79	2.02	1.76	0.95	4.56	4.37	0.38	1.35	0.84	2.42	1.72	3.07	2.39	0.97	0.53	1.36	0.37	1.5	0.16	2.41	3.92	1.19	0.52	0.78	0.56	2.85	0.18	2.39	0.79
56853	CELF4	1.06	0	0.75	0.83	0.21	1.32	0.74	0.65	0.28	0.22	0.39	1.21	0.46	0.26	2	0.59	1.85	0.79	1.98	1.09	0.95	0.72	0.68	0.87	1.12	0.35	1.58	0.75	0.51	0.65	1.38	0.35	0.51	0.51	0.26	0.2	0.84	0.17	1.04	0.71	1.09	0.24	0.28	0.61	0.26	0.57	0.49	0.16
931	MS4A1	5.67	37.74	47.31	7.42	8.94	1.78	0.26	4.06	68.69	7.12	15.23	12.43	1.65	0.12	5.67	0.64	72.5	18.1	0.5	75.75	132.89	13.68	3.47	127.63	2.65	2.56	0.35	17.77	6.77	0.35	438.31	4.08	2.11	2.89	0.29	0	0.19	0.49	0.62	0.56	4.55	0.39	9.27	3.01	39.43	11.16	0.54	0.71
84916	UTP4	32.92	45.98	30.04	41.21	36.53	30.74	37.13	52.13	69.62	73.87	41.01	35.4	26.83	61.16	28.46	51.44	45.5	62.48	33.79	44.65	43.73	38.34	29.61	26.67	34.55	77.02	28.59	77.38	29.66	31.81	32.58	37.63	40.08	36.68	38.75	47.7	30.95	78.8	36.56	45.96	29.8	45.27	20.85	45.5	23.35	38.46	31.73	54.04
23017	FAIM2	10.84	0.44	7.47	2.35	1.12	0.33	11.43	1.05	3.2	0.56	1.94	5.29	4.26	0.45	11.96	1.3	1.98	1.19	9.98	9.19	1.28	4.21	3.8	3.27	11.58	0.28	15.64	0.25	1.98	7.11	0.93	0.27	9.4	0.56	2.14	0	0.98	0.36	10.52	4.1	6.96	8.95	3.22	0.21	26.08	0.4	1.93	0.74
165631	PARP15	260.12	373.63	228.8	274.88	211.1	315.68	148.25	205.39	321.08	239.11	344.06	427.85	343.47	264.37	374.48	339.25	504.3	386.64	153	229.83	427.37	509.71	345.36	541.93	188.34	425.99	367.2	468.31	308.16	436.73	675.15	316.78	250.03	574.99	258.16	290.01	372.37	421.95	167.71	277.9	379.62	208.6	242.67	169.32	186.5	497.05	450.37	277.07
11198	SUPT16H	52.75	59.69	40.71	54.35	41.93	61.22	49.04	76.2	117.32	154.34	45.32	57.34	43.03	88.06	42.4	52.75	62.07	53.66	57.95	64	60.87	63.6	42.44	42.03	57.71	82.02	51.81	113	40.57	52.43	64.78	105.66	60.19	83.44	56.29	81.35	39.82	77.16	54.57	51.22	48.95	58.99	32.44	64.29	44.55	99.67	49.51	108.95
1153	CIRBP	183.26	120.92	126.47	91.1	105.43	94.92	172.99	104.67	147.98	139.59	101.97	161.54	145.31	120.1	198.17	77.22	173.57	107.78	191.57	140.18	95.56	109.91	181.21	141.3	123.23	74.81	163.03	93.69	143.75	190.94	169.62	72.61	167.02	138.61	104.63	43.48	104.53	80.7	157.46	147.91	181.21	120.31	128.72	51.71	151.24	113.6	188.31	93.49
114108587	ATF7-NPFF	12.28	0	0.42	10.34	2.46	0	4.53	3.34	0	4.47	2.58	0	0	1.98	0	7.82	0	0	2.04	0	2.82	0.14	3.23	3.66	3.46	0	0	0	1.08	0	0	3.32	4.38	0.75	0	5.35	8.12	0	0	10.28	0.16	4.9	7.26	2.92	1.98	6.5	9.55	2.88
2619	GAS1	106.13	9.57	27.41	239.86	9.87	88.57	108.22	27.5	31.84	44.91	13.88	63.34	89.24	59.32	65.66	138.56	21.83	53.1	118.68	60.33	10.1	45.12	59.72	211	69.22	26.46	90.86	12.96	6.58	43.28	20.52	7.54	51.6	18.56	18.41	64.7	12.04	26.96	92.75	70.17	37.42	48.93	17.92	74.35	94.01	7.32	69.52	19.53
64518	TEKT3	0.9	0.34	1.22	0.34	0	0.49	0.63	0.54	0.65	1.56	0.32	0.79	0.38	0.13	0.73	0.35	0.41	0.17	0.14	0.97	0.18	0.41	0.53	0.21	1.33	0	0.39	0	0.31	0.37	0.83	0	0.49	2.37	0.16	0.41	0.2	1.3	0	0.75	0.66	0.29	0.53	0.57	1.39	0.67	0.21	0
1666	DECR1	30.67	39.08	38.62	28.58	36.6	36.8	32.43	53.56	38.03	36.81	55.16	41.16	29.93	39.37	45.54	39.28	36.05	33.94	33.29	41.11	25.08	46.79	40.61	29.23	40.68	38.89	35.28	47.9	41.33	41.67	40.12	43.21	39.16	29.88	48.68	33.89	32.84	30.46	33.01	23.42	28.81	30.35	38.5	21.38	32.82	54.49	28.7	35.2
8437	RASAL1	15.92	9.75	27.33	9.91	40.08	4.93	1.42	7.48	12.21	13.27	37	7.19	3.16	23.3	18.51	17.34	19.27	8.49	1.61	4.38	57.4	13.95	1.65	4.69	1.89	6.81	1.45	7.66	32.09	1.14	23.45	17.25	9.73	16.93	23.97	7.23	61.31	16.99	1.57	2.04	21.26	1.59	60.39	10.17	7.21	16.71	1.93	31.17
65084	TMEM135	7.74	22.41	7.41	6.38	4.01	4.67	9.82	9.87	7.51	5.7	7.58	8.21	13.1	8.23	8.1	4.97	9.64	6.02	9.64	12.02	6.23	12.66	10.25	9.93	13.14	25.64	12.83	7.42	4.8	10.62	7.74	8.46	13.87	9.25	6.78	3.2	4.9	4.44	11.74	8.91	8.32	11.31	4.71	6.56	7.21	5.06	11.62	7.69
10445	MCRS1	47.38	65.92	49.15	58	49.99	68.12	51.73	73.18	58.44	65.26	59.77	51.15	40.57	81.31	52.43	47.59	46.36	48.73	61.5	51.05	47.4	48.73	41.42	39.23	48.17	56.73	52.15	36.4	49.01	48.47	45.8	77.88	56.34	48.49	39.1	48.64	42.97	55.18	55.73	51.09	60.98	54.54	55.85	63.66	54.43	102.97	53.68	53.41
54438	GFOD1	44.54	32.31	36.16	29.02	38.28	38.03	31.36	27.48	36.01	18.08	46.39	49.74	35.05	18.5	52.39	39.96	53.43	47.07	29.59	33.04	74.07	32.91	52.6	39.34	25.66	37.66	47.31	30.3	35.22	34.82	43.43	16.64	37.91	15.77	46.32	73.7	78.64	35.6	28.46	34.43	44.26	24.2	36.34	43.29	52.89	53.14	34.43	51.68
23235	SIK2	48.03	52.89	37.02	40.18	33.02	40.85	46.93	44.89	43.96	33.55	36.74	58.37	65.63	27.36	53.68	34.39	53.24	40.24	42.62	46.58	39.66	54.03	49.62	68.63	45.43	41.6	53.32	42.17	37.95	43.62	52.4	22.36	46.95	44.58	44.94	32.89	42.95	34	45	63.31	67.53	55.78	38.91	23.31	45.89	43.25	62.97	33.73
790955	UQCC3	24.17	45.22	19.73	29.42	20.86	26.63	20.74	33.15	27.12	27.84	38.57	30.34	20.19	35.17	24.93	21.42	34.13	29.1	21.16	19.97	28.24	30.73	28.21	23.5	16.37	47.71	27.43	40.29	30.44	28.21	34.35	45.3	19.04	37.47	20.6	27.7	30.61	39.2	18.84	20.18	30.93	20.2	29.28	21.12	24.89	33.16	27.12	23.77
729665	CCDC175	0.16	0.39	0.62	0.61	0	0	0.17	0	0.37	0.18	0.19	0.46	0.21	0.89	0	0.19	0.48	0.19	0.3	0.31	0.2	0.72	0	0	0.17	0.23	0	0.22	0.73	0.27	0.95	0.16	0	0.28	0.52	0.22	0	0.2	0.31	0	0.24	0.34	0.52	0	0.33	0	0.22	0.35
2591	GALNT3	23.56	40.65	26.98	24.34	32.21	25.77	1.73	39.22	36.62	44.9	29.13	16.71	7.11	27.01	18.53	14.66	38.1	39.11	1.95	9.29	28.35	15.55	2.49	7.84	2.86	43.64	0.19	30.99	25.99	2.69	7.81	72.73	16.25	10.61	39.29	29.62	20.48	33.79	1.36	2.95	9.81	2.38	44	38.83	12.63	24.94	3.72	40.98
124599	CD300LB	0.39	1.34	3.88	2.44	1.79	2.16	3.03	1.89	2.12	0.73	1.7	3.37	3.95	0.93	2.55	1.84	2.85	4.95	2.18	6.46	1.92	2.97	1.32	7.38	2.13	2.93	3.63	1.31	0.41	1.39	1.9	0	1.69	0.83	1.89	1.43	2.18	0.47	1.5	2.45	2.08	4.54	1.02	0.42	5.12	0	2.86	1.25
125965	COX6B2	45.77	58.4	37.83	61.99	33.19	63.43	32.96	32.29	54.26	47.6	71.2	77.83	61.55	63.34	66.79	75.35	72.85	74.69	31.21	32.39	81.24	69.6	54.26	87.77	26.74	150.07	78.27	228.09	60.51	55.42	91.45	42.54	44.18	138.64	65.66	97.46	81.04	79.7	31.05	65.06	84.43	44.25	62.26	62	49.61	97.91	76.85	74.5
153769	SH3RF2	59.46	47.28	74.07	36.7	102.46	44.69	9.23	17.33	37.63	37.06	124.15	34.71	15.19	40.09	71.23	102.73	65.24	35.22	7.56	13.56	156.52	55.52	12.15	19.78	6.61	57.7	12	91.72	118.66	15.39	11.79	57.53	35.44	26.72	87.33	51.35	153.28	57.69	6.39	13.76	68.68	7.44	125.73	93.97	22.7	50.26	15.72	111.84
1775	DNASE1L2	1.72	9.44	1.86	4.28	0.6	2.67	1.33	2.84	4.1	5.17	2.99	2.73	0.44	4.98	2.55	2.05	1.91	4.88	0.64	1.96	5.49	1.9	3.54	1.98	1.7	0.98	0.91	3.05	1.45	0.47	8.61	3.47	0.75	3.39	8.48	1.43	1.95	2.08	0.66	2.39	6.02	1.01	9.17	2.2	2.67	8.87	1.44	4.04
113246	C12orf57	124.19	119.68	135.1	124.51	88.85	120.08	190.73	141.29	102.79	117.29	97.09	122.85	140.67	131.65	121.73	125.97	91.2	127.28	210.93	186.06	38	119.95	183.54	106.47	151.07	40.37	172	191.63	71.85	187.39	113.72	114.52	119.89	416.14	69.99	36.97	60.65	45.06	226.53	152.14	110.97	190.37	59.35	39.96	124.27	99.84	128.87	55.25
54586	EQTN	0.49	0.3	0.71	0	0.23	2.12	0	0.45	1.27	0.46	1.15	0.35	0.96	0.24	0.6	0.31	0.36	1.76	0.45	0.25	0.6	0	0	1.4	0.48	0.37	0	0	1.03	0	0.68	0.45	1.06	0	0.8	2.2	0.62	0	0	0	0	1.21	1.04	2.07	0	1.68	0.68	0.75
4081	MAB21L1	2.94	0.71	2.65	1.92	1.62	1.71	5.08	1.13	2.19	2.17	1.17	2.88	4.14	0.7	6.29	0.55	1.49	0.93	5.01	1.2	1.14	2.34	7.95	1.11	3.66	1.77	4.71	0.59	0.81	6.68	1.93	0.42	3.88	3.47	1.32	1.72	1.31	0.56	3.43	3.59	5.18	4.99	2.6	0	4.18	0.68	7.07	1.49
5689	PSMB1	80.56	102	89.49	89.79	99.39	229.81	121.86	203.16	110.29	127.89	87.91	91.91	91.56	245.04	102.64	142.28	92.54	108.62	109.94	96.79	92.2	142.84	85.29	58.41	111	102.5	98.91	105.89	92.96	128	84.86	227.03	100.84	120.32	97.88	176.96	63.44	126.3	117.34	81.17	103.91	137.48	62.82	195.6	81.87	94.17	80.6	120.8
55193	PBRM1	39.22	41.5	34.43	34.42	37.85	34.5	43.66	33.7	36.01	27.62	34.46	42.35	42.22	28.24	41.26	27.06	36.11	40.53	44.55	42.76	31.9	46.76	47.2	50.3	48.92	35.36	49.81	21.78	34.56	46.76	55.33	31.78	49.56	51.62	37.86	29.39	40.06	23.77	45.73	40.5	39.07	46.48	30.25	20.05	35.52	50.05	41.64	36.29
2130	EWSR1	125.22	161.75	133.87	140.94	137.38	206.21	150.99	182.83	183.95	201.01	172.13	208.66	167.42	195.69	160.01	160.78	200.47	182.96	128.2	156.52	197.66	189.17	147.59	175.67	146.5	212.29	174.84	151.62	130.79	160.66	251.26	191.62	137.19	224.88	122.82	161.45	137.05	209.48	138.32	143.17	195.19	165.07	110.82	125.78	112.52	296.73	160.06	133.26
10158	PDZK1IP1	48.01	42.01	204.07	30.89	100.74	59.16	0	1.02	166.6	123.93	318.98	57.52	4.99	82.13	26.87	115.37	72.53	71.69	1.03	1.08	470.81	268.68	0.72	0.8	0.55	45.18	2.21	274.04	45.78	1.51	0	64.78	15.81	10.18	54.32	19.35	29.13	14.15	0	1.55	19.48	0.55	135.73	115.05	47.46	1.51	0	469.34
9942	XYLB	57.67	65	53.35	66.1	45.69	71.38	42.08	42	68.14	54.06	77.11	91.21	76.78	44.13	67.27	69.89	97.53	80.64	39.59	47.15	88.39	89.53	73.77	88.88	40.44	106.46	88.31	98.63	81.24	90.95	118.57	52.89	57.58	108.13	62.37	64.53	85.73	79.09	37.53	64.09	87.94	44.76	60.61	30.92	47	111.2	80.57	56.26
11146	GLMN	6.86	6.38	5.27	4.61	7.12	6.73	4.19	8.3	5.15	5.69	6.64	7.49	6.67	8.61	5.16	6.15	10.65	7.35	6.59	6.16	5.56	4.97	6.31	7.22	6.96	6.52	7.02	18.11	5.16	6.3	9.56	5.16	8.3	7	7.22	7.49	6.08	7.12	7.57	9.35	6.58	6.23	5.63	7.71	7.27	9.46	7.3	9.46
55238	SLC38A7	30.19	44.56	28.35	56.85	25.85	54.57	25.59	51.62	49.22	59.91	41.92	51.88	41.68	50.95	35.78	61	55.46	52.3	27.76	40.17	48.77	51.35	43	66.53	31.48	62.48	51.02	54.72	40.62	49.29	58.04	35.98	27.08	58.65	35.93	48.09	51.99	63.55	22.8	44.24	53.76	40.36	34.59	32.68	31.59	56.19	50.94	39.95
155184	SLC2A7	0	0	0.27	0.33	0	0	0	0.24	0	0	0	0	0.38	0.27	0	0	0	0	0	0	0	0.5	0	1.54	0	0	0	1.82	0	0	0	0	0	0	0	0	0.83	0.31	0.25	0	0.48	0	0	0	0.35	0	0	0.38
9577	BABAM2	57.84	67.12	54.82	58.05	46.08	58.59	59.41	73.83	71.36	52.43	55.37	51.97	58.42	42.87	58.46	62.05	55.49	52.39	51.4	69.66	79.58	69.11	50.3	64.09	56.1	53.01	52.77	60.68	41.5	61.08	56.65	54.51	42.53	59.82	59.48	47.77	48.16	87.29	59.16	57.15	43.74	53.32	43.6	41.26	59.5	45.1	72.03	41.41
55813	UTP6	39.22	46.56	30.36	49.61	34.34	50.16	31.76	38.37	51.48	43.54	57.94	64.72	53.93	39.4	51.07	54.75	67.25	54.48	33.07	43.21	60.15	55.08	51.82	70.66	31.59	80.87	58.14	81.79	49.14	59.51	90.33	50.55	37.17	57.85	53.79	51.27	68.02	63.47	34.91	53.77	78.19	39.74	45.91	45.1	40.85	87.3	64.73	50.75
219873	OR10S1	0	0	0	0	0	0	0	0	0	0.44	0	0	0	0.42	0	0	0	0	0	0	0	0	0	0	0	0	0	0	0	0	0	0	0	0	0	0	0	0	0	0	0	0	0	0	0	0	0	0
5629	PROX1	4.89	2.01	3.04	2.86	3.23	1.87	4.84	1.87	3.96	1.91	2.79	3.24	13.69	2.16	3.76	2.37	2.65	5.28	3.48	9.12	1.38	2.2	3.6	5.37	4.9	3.2	3.9	1.23	2.26	4.58	9.34	0.73	3.28	1.72	3.38	0.48	0.99	3.7	4.62	3.85	1.63	3.09	1.92	4.88	2.15	0.45	2.86	2.37
220064	LTO1	16.39	27.94	17.49	27.02	16.73	19.63	11.95	96.1	125.07	187.09	40.3	21.94	23.41	87.2	25.34	58.92	53.8	31.81	15.28	22.16	35.16	23.9	18.54	32.14	17.91	33.43	24.61	23.56	27.05	26.5	33.24	77.46	15.5	155.67	23.69	93.01	30.44	118.79	17.66	25.82	28.66	16.06	25.37	77.83	21.08	26.84	29.88	52.5
7741	ZSCAN26	17.46	6.62	6.55	8.88	8.57	10.69	12.06	11.49	11.91	11.31	8.05	13.78	17.43	11.64	15.21	7.18	11.24	10.28	18.38	15.52	8.39	13.45	15.63	15.52	14.78	10.67	17.7	8.75	6.92	23.59	12.33	13.08	15.44	27.23	8.41	5.64	10.81	4.99	15.91	13.13	13.55	12.68	10.63	8.78	11.31	9.65	21.23	8.37
1665	DHX15	78.11	77.66	69.26	75.39	79.69	92.49	74.64	78.8	81.39	54.42	95.87	75.57	74.8	70.37	75.2	78.23	90.62	67.05	66.1	80.17	77.33	91.86	67.3	77.19	80.04	127.66	80.18	88.25	70.36	75.92	86.15	119.68	93.21	102.44	116.9	105.4	102.78	131.98	84.68	95.4	90.21	80.84	75.42	80.6	77.63	87.33	73.19	85.67
100532726	NDUFC2-KCTD14	4.84	3.04	3.85	1.49	2.31	0.45	2.65	0.93	5.54	0.91	1.48	2.09	4.51	9.69	6.75	3.04	2.58	2.18	2.57	2.04	0	2.38	0.42	1.66	1.53	15.91	2.67	0.78	2.16	0.49	0.79	4.34	1.08	10.5	0.67	0.81	0.92	2.29	1.19	0.45	5.24	2.61	5.64	1.07	6.8	0.79	0.82	9.54
729991	BORCS8	34.13	61.21	45.61	52.35	40.49	53.53	33.12	43.05	43.78	43.49	51.11	60.62	44.72	49.9	56.31	38.97	66.78	65.81	45.86	53.15	59.95	62.83	52.93	56.43	37.56	65.31	52.96	55.56	45.2	43.88	70.18	63.57	36.11	44.61	36.4	48.54	50.22	56.89	37.11	47.49	76.63	38.58	41.94	41.48	33.75	72.3	68.61	40.79
331	XIAP	66.51	84.45	59.96	85.17	60	82.82	49.38	93.44	80.66	65.45	91.72	98.85	81.06	53.78	84.02	79.84	110.05	85.71	54.56	66.55	106.82	112.05	81.02	103.34	59.4	124.92	87.38	97.21	84.86	90.42	121.41	78.26	69.63	97.7	77.74	77.78	93.59	95.67	57.33	78.98	98.7	60.79	75.34	56.59	60.07	114.35	93.3	74.05
7919	DDX39B	221.99	215.06	221.79	283.8	207.87	335.99	193.88	250.88	309.51	305.75	232.42	235.31	256.36	260.72	210.67	241.38	250.98	294.95	222.43	252.22	316.66	235.23	271.44	306.46	216.55	348.1	252.09	269.73	209.36	258.11	324.47	342.16	218.14	585.68	265	228.99	336.24	389.71	234	249.86	388.06	217.17	225.44	231.14	218.43	246.89	335.43	249.36
107987211	LOC107987211	1.94	2.33	2.65	1.82	1.83	2.06	1.12	2.13	2.09	1.54	2.22	4.2	2.45	1.5	2.24	1.56	5.39	2.56	1.96	1.98	3.98	3.67	1.89	15.66	1.3	1.3	1.72	3.31	2.17	1.77	12.62	1.98	2.55	2.68	2.37	2.94	2.04	2.07	1.22	2.02	1.56	0.71	1.83	0.74	1.02	2.34	1.75	1.05
3851	KRT4	19994	218.23	11451.6	753.78	27170	16.5	28.49	316.28	25.27	13.41	11282.3	241.71	21.25	5.89	10042.1	7.75	313.69	80.86	12.87	4.06	765.95	31.36	12.16	3.92	10.18	3.59	5.57	60.68	28535.2	20.21	16.06	47.88	8512.47	199.62	6299.85	37.66	26302.8	37.11	11.04	32.09	1141.32	17.9	24688	14.76	1175.45	4.27	13.15	5248.65
79969	ATAT1	9.54	17.85	10.36	18.29	9.98	13.65	10.15	17.98	9.87	12.66	18.29	10.56	11.96	9.55	16.96	15.58	15.57	15.59	7.24	13.1	16.6	10.97	10.33	14.31	9.66	37.76	10.14	21.24	12.89	9.17	10.25	12.27	7.21	33.37	15.02	6.51	16.88	30.58	5.92	8.9	22.69	6.28	13.55	8.44	9.91	25.61	10.77	10.63
51115	RMDN1	70.36	84.4	61.77	68.21	62.49	105.01	76.16	69.81	86.04	96.06	83.3	91.35	88.48	69.36	88.67	59.6	99.7	82.45	78.59	79.72	96.54	117.4	80.17	89.45	86.58	112.42	97.99	107.29	82.24	100.52	129.92	63.05	85.23	82.55	85.77	61.49	97.86	82.12	67.94	82.26	99.54	71.02	72.17	57.23	63.47	141.3	103.29	78.42
284904	SEC14L4	36.23	45.69	39.06	53.55	35.69	42.68	29.67	30.22	44.83	38.94	61.3	62.76	46.19	32.96	58.18	56.15	70.51	51.2	29.79	27.26	62.68	70.85	46.57	73.06	29.1	74.49	50.89	71.1	59.9	61.76	73.09	36.33	34.63	72.68	49.72	51.54	81.93	59.2	22.57	42.95	68.09	34	57.78	31.13	37.88	109.52	55.63	48.12
136371	ASB10	0	0	0	0	0	0	0	0	0.29	0	0	0	0.34	0	6.46	0	0	0	0.25	0	0	0	0	0	0	0	0.35	0	0	0	0	0	0	0.37	0	0	0	0	0	0	0	0	0	0	0.52	0	0	0
5707	PSMD1	40.55	49.77	39.79	60.15	49.33	68.73	46.99	93.82	53.05	54.56	49.97	51.56	47.75	56.59	46.79	61.44	64.69	68.28	43.5	53.09	60.23	79.04	47.42	47.83	48.58	76.47	55.78	55.76	45.66	55.94	54.14	60.52	49.99	70.79	61.17	64.48	46.04	142.24	60	53.64	45.68	56.74	40.29	58.43	40.92	49.79	49.75	54.42
147495	APCDD1	89.01	63.09	94.48	79.27	77.98	96.93	58.61	36.13	59.54	37.44	81.56	55.31	51.65	48.69	77.69	160.42	98.13	94.15	48.52	32.04	71.98	76.27	60.68	52.47	45.85	83.98	68.21	123.85	92.3	45.31	47.5	59.75	67.33	145.42	56.35	70.06	66.58	58.24	39.23	41.9	90.12	47.14	52.07	110.66	70.58	49.52	49.25	91.06
643418	LIPN	2.89	3.9	3.53	5.11	2.8	4.19	2.48	2.76	4.28	2.76	4.91	5.83	4.88	3.7	4.24	7.99	7.24	4.49	3.09	2.95	7.77	8.65	3.37	5.76	2.21	8.71	5.37	5.69	5.67	4.75	8.68	5.64	4.76	8.25	3.64	5.71	6.04	5.04	1.81	5.67	5.88	2.76	5.1	4.08	4.65	6.17	5.39	4.21
23567	ZNF346	60.02	63.5	48.78	67.82	47.12	57.99	48.66	45.49	60.36	63.12	73.25	95.32	65.84	43.5	73.79	67.09	87.62	71.07	47.45	54.31	72.79	84.05	91	82.2	47.01	85.78	84.84	64.95	76.75	75.6	116.42	46.33	56.05	85.31	55.72	63.3	90.71	73.08	53.92	57.77	88.47	53.78	51.31	33.53	43.07	99.44	79.44	46.32
54788	DNAJB12	30.14	29.25	27.57	34.83	28.78	35.83	34.16	42.71	35.66	40.86	34.25	41.37	34.37	31.17	35.32	32.68	28.88	32.95	33.84	41.36	21.87	28.67	34.54	38.39	34.68	25.98	41.75	26.08	27.02	37.69	30.15	33.41	27.48	38.48	22.03	24.92	31.2	26.3	32.4	27.7	33.04	34.7	25.22	18.52	25.62	24.99	40.5	25.33
58189	WFDC1	59.39	11.69	57.48	13.65	30.77	10.99	18.51	2.6	21.47	10.93	21.92	21.48	19.07	1.28	27.92	10.5	19.61	10.67	15.79	6.15	7.4	10.3	14.15	16.75	16.84	3.53	16.83	6.75	17.84	12.47	2.46	6.5	53.9	16.41	11.72	3.94	23	5.58	10.86	21.13	78.76	20.79	25.48	9.82	60.79	0	32	12.48
51081	MRPS7	44.62	58.7	44.29	39.62	50.95	87.13	41.65	91.87	77.52	122.88	54.17	53.91	29.72	152.82	49.41	41.22	50.07	60.88	44.84	61.37	33.61	29.98	41.61	31.66	49.3	124.53	36.31	34.74	54.13	50.52	37.54	101.74	50.26	35.3	42.81	69.26	28.5	66.29	40.4	33.81	45.55	42.47	35.28	45.37	33.16	55.74	41.29	71.02
201255	LRRC45	8.15	17.25	10.93	13.14	12.26	15.97	7.55	23	14.56	16.51	16.05	10.32	6.37	6.9	9.85	14.02	13.33	18.76	7.54	10.9	24.83	10.32	5.12	10.24	6.73	9.92	6.16	17.88	13.29	7.42	10.61	24.61	9.24	20.99	9.6	14.75	11.72	12.24	7.3	8.98	13.84	6.01	18.33	9.18	10.76	20.7	8.31	17.52
147929	ZNF565	39.64	49.86	35.83	57.59	30.09	45.55	38.25	30.17	44.31	43.72	57.22	54.21	62.81	33.3	55.55	50.12	69.1	55.33	39.11	35.18	68.02	59.57	64.26	73.48	32.29	80.54	67.79	61.17	48.32	64.43	75.43	50.47	37.35	61.17	58.44	48.04	65.2	66.96	33.12	62.4	79.87	33.88	55.31	38.77	40.08	77.6	77.7	40.8
8277	TKTL1	0	0	0	0.62	0.16	0.4	0	217.15	2.97	0	0	0.24	1.4	0	0	0	0.25	0	0.34	0.53	0	0	0.94	0.52	0.36	0	0.24	0	0	0.74	1.52	2.85	0	0	0.39	0	0	0.66	0.35	0	0	0	0	0	0	0	1.02	0
148281	SYT6	0.87	1.39	0.21	1.53	0.13	0.84	0.29	1.19	0.8	0.38	0.58	0.71	0.73	0.43	0.61	0.36	1.29	0.52	0.35	0.59	0.51	1.36	1.54	1.1	0.26	0.6	1.02	0.93	0.61	0.22	1.22	0.56	0.29	0.98	0.58	0.79	1.23	0.37	0.18	0.71	0.9	0.28	0.59	0.23	0.16	1.08	0.63	0.43
27240	SIT1	2.63	14.99	10.14	2.97	6.19	3.73	1.09	3.44	17.86	3.87	5.29	3.97	0.96	3.05	2.32	1.78	16.09	16.22	0.7	19.54	13.79	7.77	0.96	19.35	1.85	1.6	0.5	12.35	3.55	1.02	71.85	7.89	1.64	2.11	1.61	1.04	1.06	0	1.08	1.56	4.03	4.4	6.65	4.79	7.98	1.52	1.04	1.2
112812	FDX2	13.82	15.73	19.53	19.47	13.26	25.83	23.92	25.28	23.94	38.69	15.4	21.25	23.37	28.31	20.87	12.24	23.02	17.91	33.43	18.95	12.63	17.83	30.75	14.01	18.89	26.76	24.37	18.32	12.91	24.3	18.69	19.9	19.7	24.22	20.1	16.16	21.22	25.86	20.53	19.28	26.38	20.55	12.38	23.27	16.06	31.53	27.73	17.82
5871	MAP4K2	31.03	44.19	32.75	40	24.22	44.16	28.51	45.21	37.62	38.19	41.21	41.33	38.39	32.43	40.07	39	50.52	50.94	29.7	36.67	60.51	47.52	42.02	53.87	28.11	64.71	44.03	49.28	32.71	46.27	95.31	48.81	29.34	62.98	29.83	35.65	38.21	48.71	24.87	34.57	50.51	31.01	36.41	30.47	31.67	49.29	44.61	32.45
5105	PCK1	0.93	1.67	1.43	0.39	1.71	1.17	2.06	0.21	0.81	0.32	1.09	1.74	2.34	0.65	2.21	0.93	2.56	0.67	0.86	0.77	0.72	1.61	0.75	2.51	2.49	1.72	1.5	0.72	1.17	0.25	2.3	0.3	0.64	1.61	0.2	0.22	1.05	1.39	1.07	1.29	0.64	0.73	1.87	0.79	2.03	0.8	6.96	10.88
130827	TMEM182	1.23	5.76	0.97	4.12	1.95	2.94	0.9	8.05	6.51	5.6	4.34	2.13	3.09	4.39	6.05	0.96	2.95	4.24	1.73	1.48	1.97	5.68	2.07	4.61	1.45	2.87	0.55	13.55	0.92	3.27	4.21	10.25	1.34	7.5	2.86	1.83	1.14	4.87	2.04	1.54	1.08	2.03	2.26	2.6	1.29	3.25	3.35	4.63
1411	CRYBA1	1.18	2.01	0.53	1.33	0.51	3.25	0.57	0	0.64	0.55	1.37	3.88	2.25	1.06	2.9	0	1.16	1.01	1.63	0	2.16	0	4.53	1.68	1.16	0.83	3.89	0	1.24	3.18	3.26	0.54	2.56	0.82	1.26	0	0.83	0	0.56	1.63	3.16	2.87	1.74	1.25	0.81	0	1.63	0.9
7105	TSPAN6	40.41	38.41	39.85	31.12	39.44	27.99	17.83	67.23	30.7	22.35	40.52	32.46	28.6	26.31	38.64	32.28	38.01	34.27	14.21	24.98	32.86	36.58	25.02	42.48	17.4	40.14	29.58	49.16	42.72	26.21	35.06	29.77	28.86	47.72	37.36	28.31	55.43	37.3	14.87	23.47	28.53	18.64	75.5	20.96	20.64	39.32	29.51	37.58
10483	SEC23B	38.25	64.83	42.97	34.97	46.39	44.01	20.62	74.24	67.99	57.41	53.66	39.57	32.36	62.48	40.84	41.86	50.21	58.41	19.12	46.93	51.93	46.99	20.88	41.43	26.19	71.1	32	98.52	44.3	26.83	63.09	49.56	26.75	46.64	44.2	54.26	42.87	52.52	22.45	31.66	36.48	31.21	45.2	43.68	39.92	77.71	26.67	63.43
6383	SDC2	49.49	12.02	23.61	51.58	20.53	33.9	67.26	20.74	24.2	15.85	11.86	40.62	47.87	32.58	43.39	37.04	14.92	38.98	66.22	54.35	6.12	32.87	44.66	46.28	69.69	8.45	56.78	10.09	10.66	46.31	5.44	5.56	61.27	49.8	17.88	20.36	20.63	9.9	58.98	36.94	41.67	66.32	13.08	20.11	66.08	5.31	38.07	6.91
55589	BMP2K	40.06	39.45	40.53	38.5	32.59	43.28	37.95	33.93	36.29	18.87	35.7	47.95	48.48	22.14	45.44	58.71	45.32	46.71	31.2	58.84	53.88	53.74	43.54	65.79	43.43	32.91	44.95	28.59	37.77	41.33	96.89	31.86	51.67	33.85	30.92	32.32	53.8	30.89	37.82	41.9	32.33	43.75	34.2	39.99	40.98	31.72	41.86	30.74
1519	CTSO	28.09	22.17	19.45	20.91	10.04	23.51	29.24	19.93	22.19	6.65	12.55	30.58	41.21	28.28	25.14	18.88	20.05	20.75	24.01	47.3	7.37	38.74	24.57	48.83	44.93	10.3	34.49	11.91	8.28	35.89	19.69	8.18	31.94	16.88	15.02	8.56	7.62	13.41	33.59	26.09	16.78	47.95	9.72	5.9	34.89	6.48	39.2	7.06
221908	PPP1R35	29.18	52.63	31.23	39.18	32.5	37.24	34.86	115.2	76.5	61.07	33.96	45.82	22.8	16.44	34.93	30.48	92.31	93.3	46.06	44.12	69.28	24.87	44.61	37.4	27.06	126.07	22.22	96.61	23.82	30.29	56.77	43.03	33.24	40.55	27.44	45.2	28.36	128.23	25.3	37.48	47.88	38.61	40.32	39.79	39.54	54.32	34.62	45.77
10296	MAEA	41.04	43.89	45.7	38.25	45.1	55.48	40.37	54.14	39.08	52.59	58.79	45.79	31.95	48.54	37.29	54.78	50.34	36.19	49.55	45.2	56.56	36.6	42.05	38.82	29.44	37.34	38.57	41.53	49.58	40.82	42.39	46.35	34.13	40.39	36.56	58.74	56.28	63.49	39.77	31.4	49.8	37.25	44.38	56.95	37.93	35.67	38.73	49.59
92609	TIMM50	69.17	99.34	70.19	110.77	74.03	94.2	63.83	59.11	100.25	100.79	108.09	122.59	103.32	87.77	100.06	127.94	127.12	128.27	69.76	78.31	132.78	114.7	115.69	119.69	62.4	142.42	114.52	138.95	101.9	125.17	147.75	92.55	74.79	130.55	101.76	130.29	123.09	128.67	66.32	100.64	147.79	70.94	95.11	134.97	71.01	223.06	133.28	121.25
105378952	KLF18	0	0.16	0	0	0	0	0	0	0	0	0	0.19	0	0	0	0	0	0	0	0	0	0	0.18	0	0	0	0	0	0	0	0	0	0	0	0	0	0	0	0	0.2	0.19	0	0	0	0	0	0	0
9310	ZNF235	5.6	6.67	4.04	4.59	3.04	6.35	4.47	4.37	6.06	2.63	5.02	6.11	6.44	3.02	5.19	2.82	4.07	5.55	5.06	5.95	4.63	7.16	6.61	8.43	5.53	5.18	7.04	12.24	5.6	5.88	9.33	4.87	5.37	10.62	4.18	3.31	4.73	5.35	4.57	4.63	6.95	3.28	4.42	3.87	5.82	14.41	6.41	3.87
94234	FOXQ1	60.37	157.67	46.76	37.32	23.41	64.22	11.74	95.61	37.74	10.42	90.69	37.65	23.48	59.51	29.34	49.27	55.93	43.72	12.18	27.63	70.39	42.56	17.32	2.17	18.47	75.66	9.14	122.89	25.18	22.57	0.47	144.83	18.37	38.55	96.64	40.21	11.41	27.69	13.2	10.98	65.18	11.86	88.3	80.25	71.03	7.76	12.64	79.86
11095	ADAMTS8	19.44	7.72	19.95	28.77	16.43	14.81	15.82	4.82	10.68	5.89	9.87	42.76	30.03	1.39	16.77	5.96	7.31	12.49	20.85	18.98	3.14	10.69	17.61	4.41	22.78	3.67	15.13	0.65	8.54	16.31	0.71	0.35	15.22	0.9	21.11	0.85	63.08	3.12	33.48	48.14	21	63.73	5.21	0.78	25.77	0.52	44.99	29.6
654231	OCM	0	0	0	0	0	0	0	0	3.21	0	0	0	0	0.67	0	0	0	0	0	0	0	3.07	0	0	0	0	0	0	0	0	3.08	0	0	0	0	1.03	0	0	0	1.03	0	0	0.73	0	0	2.01	0	0.79
256643	BCLAF3	15.75	12.96	13.5	13.04	10.3	15.27	12.42	19.88	15.79	12.35	14.68	20.08	16.8	9.99	19.26	11.49	22.37	14.76	13.76	15.63	18.28	21.18	19.43	19.77	16.28	20.2	23.6	20.39	16.19	23.79	24.26	11.73	18.01	18.48	15.46	13.39	21.16	12.86	14.38	17.14	25.55	15.74	15.98	7.43	15.13	23.09	19.44	12.63
400745	SH2D5	0	0.27	0.35	10.52	0.36	1.64	0.76	0.36	1.38	5.25	0.23	2.49	0	1.09	0.16	11.51	0.6	1.1	0.69	0.55	1.95	0.18	0.68	0.37	0.88	4.46	0.78	9.63	0.25	0.71	0.66	0.84	0.57	1.49	0.57	16.91	1.15	7.43	0.12	1.1	1.81	1.14	0.39	22.7	0.11	4.3	1.33	11.59
92552	ATXN3L	0	0	0	0	0	0	0	0	0	0	0	0	0	0	0	0	0	0.31	0	0	0	0	0	0	0	0	0	0	0	0	0	0	0	0	0	0	0	0	0	0	0	0	0	0	0	0	0	0
8835	SOCS2	35	35.68	31.03	27.75	22.96	28.12	84.14	9.89	29.01	49.52	13.06	20.89	52.61	24.46	24.27	14.41	15.06	12.38	31.76	33.2	10.04	21.89	23.31	31.48	33.69	13.58	31.11	4.63	16.34	17.48	16.14	15.39	42.05	6.77	22.28	11.47	27.02	14.09	27.92	34.93	14.98	28.72	18.68	11.01	31.24	92.42	20.22	13.8
401265	KLHL31	1.05	0.79	0.35	1.03	0.5	2.35	0.07	2.27	2.73	5.19	0.84	0.77	0.1	0.87	7.46	0.09	0.64	0.55	0.18	0.19	2.14	1.32	0.2	1.67	0.19	3.84	0	0.25	1.22	0	0.32	2.22	0.34	0.65	1.94	0.27	0.11	2.81	0	0.11	1.3	0	0.95	3.3	1.12	1.25	0	1.65
8660	IRS2	53.06	36.54	40.48	64.35	28.94	43.49	118.76	39.81	46.69	47.48	42.72	104.77	80.32	53.87	74.72	47.17	51.05	46.08	131.7	66.53	42.65	51.02	117	58.57	72.99	63.31	131.09	30.34	33.44	78.89	44.45	13.76	92.03	73.48	70.18	81.92	49.2	166.35	93.55	112.87	116.05	103.16	66.01	39.75	72.92	97.34	140.58	42
27127	SMC1B	0.33	0.25	0.4	0.38	0.11	0.37	0.32	0.31	0.36	0.31	0.36	1.03	0.85	1.71	0.96	0.53	0.61	0.93	0.21	0.43	0.41	0.77	0.71	0.78	0.33	0.63	0.44	0.98	0.57	0.75	1.95	2.09	0.48	1.87	0.12	0.15	0	2.13	0.12	0.9	0.17	0.43	0.55	0	0.32	0.6	1.08	0.24
283417	DPY19L2	23.26	12.52	11.44	17.9	10.65	12.17	16.95	8.9	14.29	7.13	12.22	28.67	31.83	10.85	26.2	19.08	20.78	14.37	17.21	11.78	14.42	21.86	35.88	28.71	14.93	16.31	46.25	23.7	13.09	35.03	18.02	11.04	18.42	53.25	12.05	8.33	15.14	7.45	23.32	30.52	23.95	15.09	16.23	8.19	20.93	60.2	37.98	9.09
1047	CLGN	2.63	1.69	0.44	0	1.29	0.91	0.95	0.75	0.18	0.15	0.89	1.3	2.31	0.59	1.02	0.39	0.45	0.4	4.57	3.01	0.2	0.45	1.9	0.47	3.41	0	2.18	0.21	1.21	6.45	0.68	0.6	2.69	1.62	1.76	0.46	3.02	0	3.77	2.51	1.1	2.89	1.46	0	0.32	0.22	2.28	0.53
25921	ZDHHC5	94.55	194.01	106.14	70.6	119.16	88.43	48.38	162.53	78.25	86.71	128.02	75.25	46.52	122.62	80.24	86.73	84.57	111.26	49.98	75.54	122.05	101.12	44.34	51.76	60.07	104.54	56.78	61.63	95.13	51.07	53.92	145.53	61.9	62.07	84.33	59.82	93.97	97.44	63.85	53.32	61.85	64.41	90.62	63.48	53.13	56.34	53.59	91.18
283212	KLHL35	0.93	10.37	2.94	4.48	1.62	2.06	1.35	2.14	2.52	2.84	3.79	0.92	1.19	15.15	1.15	1.94	3.22	1.96	0.22	1.35	3.14	5.79	1.2	2.67	0.92	1.32	1.85	1.77	2.21	0.95	1.94	2.13	1.27	1.31	1.5	0.97	2.3	0.56	1.78	1.29	1.25	1.14	2.75	4.46	1.35	11.05	1.94	2.23
160418	TMTC3	19.86	23.13	18.32	25.56	23.91	48.65	16.09	38.75	25.8	37.77	18.12	17.84	15.44	39.29	15.9	34.28	25.14	25.09	16.96	24.36	26.73	31.55	14.7	16.51	18.32	46.67	15.08	29.65	21.44	19.59	6.29	38.74	20.52	25.23	20.11	33.08	21.48	31.64	20.01	15.63	9.02	17.89	21.24	34.32	14.3	47.55	16.01	33.6
8031	NCOA4	136.76	102.15	139.95	112.54	146.17	148.56	145.79	174.01	149.84	129.8	149.43	153.46	144.65	124.38	136.42	108.69	116.2	136.39	183.24	187.18	96.77	136.61	133.36	110.8	177.26	98.18	157.67	101.5	126.75	173.84	123.35	288.2	155.92	91.33	123.8	145.98	103.72	80.31	178.31	126.92	91.2	157.74	108.22	137.8	134.3	47.29	111.18	125.26
1477	CSTF1	36.83	53.06	26.11	39.57	31.21	47.74	28.11	57.57	50.22	46.65	44.24	42.77	36.36	34.2	40.21	40.64	52.81	50.47	33.79	33.58	52.78	47.27	39.67	48.52	28.45	70.49	40.86	50.9	35.93	40.35	59.26	52.79	30.22	68.54	37.11	40.76	46.51	55.64	26.2	36.97	54.01	28.04	43.76	34.16	31.58	54.84	48.64	45.77
10365	KLF2	284.37	55.1	235	196.37	108.39	55.79	1010.52	72.8	179.77	66.7	113.4	474.58	814.31	18.79	270.88	75.52	207.6	145.95	1469.36	435.81	85.8	231.26	979.72	644.21	435.17	18.05	496.67	40.42	58.5	317.61	157.36	24.25	512.61	29.87	146.51	25.78	68.36	14.58	617.36	411.82	290.77	246.15	174.14	35.8	393.72	17.64	295.89	69.02
205564	SENP5	46.74	50.6	36.71	52.12	41.88	92.33	42.69	69.68	68.06	75.06	52.72	72.14	55.93	80.76	53.61	56.54	74.67	78.2	49.4	56.29	95.32	107.34	62	69.17	44.55	114.9	69.15	85.72	45.09	63.42	74.84	76.87	55.6	89.03	54.63	74.63	62.4	67.77	51.59	65.34	69.03	51.64	46.8	61.59	52.18	85.57	70.68	71.42
646817	SETSIP	2.34	0.76	0.49	1.26	1.09	3.13	0.68	1.65	1.7	1.65	0.57	4.98	2.7	0	3.84	1.27	1.19	1.56	2.57	2.05	1.23	3.52	4.36	0.16	2.13	0	5.43	0	2.03	0	2.19	0.97	2.71	1.76	2.55	0	3.2	1.92	0	7.84	1.9	1.22	0.52	1.25	0.91	1.39	5.22	1.1
733	C8G	0.53	1.21	3.34	0.6	0.92	1.17	1.02	0.97	0.57	4.96	4.59	0.7	1.35	4.78	5.23	0	2.93	2.54	1.96	0.51	1.3	2.19	0.68	2.27	0.52	0.75	0.7	4.02	0.56	0.72	0.73	2.9	1.15	1.49	2.26	0.73	1.49	0.64	0.51	0.73	3.55	1.03	1.56	0	0.51	2.15	0	2.82
3692	EIF6	175.27	264.53	223.91	156.22	241.62	185.67	92.66	286.75	188.49	228.65	233.31	98.5	75.61	475.44	126.52	139.47	128.48	199.26	86.81	95.85	182.16	83.32	71.55	68.57	69.22	226.02	77.08	331.72	226.11	83.66	88.97	345.61	98.79	120.98	186.28	347.94	184.28	380.3	82.08	73.5	121.01	100.1	185.41	304.34	105.04	187.93	86.31	260.21
140710	SOGA1	58	80.18	44.04	64.03	50.35	86.89	65.2	109.9	61.42	73.15	46.79	77.51	69.65	54.9	56.22	49.35	75.96	66.55	73.92	59.89	61.88	62.75	79.57	59.08	65.6	81.99	86.96	78.76	48.25	69.62	40.99	59.27	55.86	136.11	55.32	46.11	46.95	84.64	71.25	74.05	83.58	55.72	39.5	45.52	44.24	73.02	80.43	49.95
55703	POLR3B	12.97	13.08	11.34	8.73	12.34	8.55	5.46	18.08	11.87	18.72	16.42	6.74	7.99	12.15	10.43	11.92	13.92	13.01	4.82	7.19	14.91	10.5	6.53	8.87	5.52	12.09	6.19	16.92	14	7.32	8.41	24.32	9.32	15.66	12.09	13.24	13.49	14.16	8.33	5.54	11.51	5.73	13.97	7.47	8.79	31.01	5.87	14.81
117154	DACH2	0.5	0.29	0.23	0	0.06	0	0.18	0	0.14	0.24	0.62	0	0.48	0.06	1.63	0	0.77	0	0	0.06	0	0.18	0	0	0	0	0	0	0.26	0	0	0.52	0.07	0.7	0	0	0	0.91	0.24	0	0.27	0	0.37	0	1.7	0	0	0
8467	SMARCA5	36.17	40.38	32.51	36.41	29.86	43.19	42.47	56.9	46.78	37.61	38.26	53.68	43.14	50.65	40.79	39.95	45.43	43.98	50.24	52.98	40.09	54.82	48.27	43.23	59.49	42.58	51.66	36.45	27.77	49.92	56.62	43.46	54.46	72.94	38.77	36.6	34.38	63.05	51.35	48.24	43.8	55.04	27.7	31.56	42.83	39.63	52.12	35.06
338324	S100A7A	0.11	2.17	0.19	3.19	0.36	0.82	0	0	27.15	12.11	21.04	3.35	0.13	1.46	2.57	70.71	52.45	7.62	0.39	0	191.71	188.75	0	0	0.31	12.22	0	7.21	0	0.42	0	11.31	0	1.48	0	1.47	0.15	29.12	0	0.14	0.34	0	0.31	11.19	0	0	0.14	86.68
8929	PHOX2B	0.16	0.73	0	1.45	0.14	1.07	2.02	0.29	0.17	0	0	0.21	0.41	0.73	1.19	0.19	0.22	0.19	1.19	0.47	0	0.22	0.21	0	0.95	0	2.55	0.2	0	0	0	0.15	0.35	0	1.03	0	0	0	0.61	0.22	0.43	0.16	0.48	0.34	0	1.09	1.12	0
100996709	LOC100996709	37.23	26.64	29.68	20.2	27.91	22.1	34.14	26.51	41.38	42.68	66.84	81.84	44.27	23.64	48.5	26.68	87.93	34.71	28.92	39.89	50.34	31.5	55.94	68.82	36.69	39.3	29.66	38.82	56.22	76.71	58.42	38.78	38.59	55.3	37.75	20.02	70.68	18.24	31.6	50.48	70.78	25.17	52.92	14.69	32.02	54.26	41.31	18.61
169792	GLIS3	13.71	9.7	8.95	75.99	7.06	34.06	18.32	13.94	16.37	12.98	9.04	32.89	35.42	16.13	19.05	80.44	15.63	50.3	14.62	29.17	6.77	22.38	24.54	60.39	20.16	41.02	17.27	5.89	4.96	25.4	10.62	9.52	16.14	6.18	14.61	25.4	36.5	19.63	18.17	52.09	24.68	38.61	25.12	19.32	29.05	13.01	53	15.56
4832	NME3	41.54	54.03	44.79	56.34	42.05	42.82	53.57	80.69	42.24	58.93	33	41.61	39.37	23.07	35.48	32.53	34.06	54.41	62.32	44.87	49.72	43.43	54.35	39.86	49.47	63.33	48.63	19.63	36.13	47.75	43.99	43.5	46.73	72.34	41.48	28.24	33.05	74.23	56.27	60.5	60.17	51.93	51.68	51.24	57.76	32.75	48.73	44.22
35	ACADS	15.6	15.83	13.15	14.84	12.27	13.19	27.99	22.96	20.52	30.77	12.4	16.73	14.3	26.37	19.22	7.82	14.49	12.28	33.8	19.46	9.85	9.12	20.31	10.82	26.91	11.06	17.38	15.39	15.86	23.36	12.83	24.48	17.28	9.93	13.01	21.61	12.01	10.87	23.92	16.86	22.54	23.08	17.01	8.27	18.1	23.08	17.23	14.5
79815	NIPAL2	67.04	94.13	65.89	33.19	66.08	57.85	19.73	78.24	69.98	50.95	95.29	52.98	44.75	41.34	67.45	41.21	68.06	48.17	24.6	30.25	82.92	99.73	33.67	58.85	30.39	70.49	37.86	104.45	82.03	37.71	53.93	53.57	40.87	37.08	101.35	44.33	88.58	40.59	21.98	36.08	44.92	25.74	86.39	35.16	41.83	87.83	33.48	61.31
140738	TMEM37	17.75	33.73	13.07	6.07	14.7	27.31	13.26	56.9	30.24	30.22	9.62	16.7	15.12	10.19	13.94	13.73	12.26	16.46	9.96	19.69	6.25	11.12	7.25	20.4	16.45	6.87	9.6	4.08	10.46	10.91	7.83	16.22	10.25	4.9	8.63	6.34	17.82	2.27	8.98	11.55	3.61	16.29	16.94	4	21.87	5.82	10.08	22.61
84937	ZNRF1	94.63	103.56	110.25	77.82	98.2	39.19	45.91	132.08	66.43	71.95	104.68	63.78	45.36	72.38	96.39	69.67	94.84	101.04	47.54	70.36	129.25	59.97	44.67	35.98	43.76	123.49	48.56	73.14	149.17	28.09	40.46	60.69	64.04	62.11	121.15	86.29	133.18	82.84	48.5	78.44	44.98	44.44	159.97	71.2	61.67	41.71	69.23	97.8
3000	GUCY2D	4.06	4.17	4.52	3.69	3.98	2.41	1.9	2.58	5.05	7.67	4.66	3.91	3.32	5.06	4.97	3.28	4.62	3.93	0.74	2.73	4.22	5.17	2.44	5.37	1.49	4.99	3.28	3.66	6.58	1.62	5.01	5.69	2.39	10.36	3.95	7.94	6.89	3.61	1.24	1.92	3.37	1.95	5.16	2.6	2.53	5.34	1.9	5.01
139760	GPR119	0	0	0	0	0	0	0	0	0	0	0.42	0	0	0	0	0	0	0	0	0	0	0	0	0	0	0	0	0	0	0	0	0	0	0	0	0	0	0	0	0	0	0	0	0	0	0	0	0
4110	MAGEA11	0.24	0	0.21	2.68	1.03	1.88	0	36.49	9.53	16.53	0.78	0	0	1.93	0.29	0	6.57	8.84	0	0	0.16	0	0	0	0	0	0	12.21	0.25	0	0.33	28.12	0	38.56	0.19	3.71	0	15.89	0	0.71	0	0	0.13	0	0	0.32	0.33	11.4
27148	STK36	13.41	17.68	11.87	22.58	9.15	17.73	11.94	17.47	9.45	9.65	13.59	16.17	16.86	13.28	16.16	13.01	10.14	12.38	11.56	11.68	12.31	14.49	20.42	24.21	14.08	28.45	18.82	14.5	13.76	16.84	11.98	6.76	9.33	39.78	17.69	8.3	20.57	17.11	11.77	15.05	25.55	13.34	25.92	10.02	17.4	12.86	21.14	11.86
129025	ZNF280A	0	0	0	0	0	0	0	0	0.25	0.2	0	0	0	5.03	0	0	0	0	0	0	0	0	0	0.3	0.22	0	0	0	0	0.28	0	3.8	0	0	0	0	0	0	0	0	0	0	0	0	0	2.05	0	0.22
4783	NFIL3	48.65	33.2	33.24	51.24	18.31	62.59	206.27	51.04	51.66	30.36	17.68	73.07	185.3	69.15	48.96	41.16	39.16	35.95	68.44	53.82	22.12	59.55	119.8	91.06	88.32	72.54	63.55	29.99	16.04	48.74	15.56	36.05	128.48	45.3	100.1	26.22	44.09	47.39	128.74	134.15	60.97	190.88	16.49	65.06	91.62	18.56	104.93	76.51
4014	LORICRIN	0.51	0	1.37	0.42	3.4	1.63	0	0.67	1.19	1.03	4.02	1.95	0.47	0.33	1.36	12.61	2.04	0	0	0.49	8.56	1.52	0	0	0.36	1.05	0	0	1.16	0	0.7	3.93	0.8	5.43	3.78	1.53	0.71	1.22	0	1.53	5.26	0	0.73	1.07	0	0	0	5.45
5361	PLXNA1	31.16	65.23	26.96	91.46	30.72	120.83	35.51	116	91	171.02	48.88	59.82	36.19	93.03	27.31	90.63	58.33	74.52	38.99	50.37	111.69	70.4	39.07	55.1	34.57	112.36	39.08	75.46	23.42	31.3	33.32	42.76	29.69	168.4	40.37	136.11	32.37	74.73	37.35	53.87	67	47.2	33.66	72.75	32.04	102.49	43.26	81.1
116064	LRRC58	47.59	61.55	39.17	61.75	37.99	79.23	49.79	84.15	73.05	94.56	57.69	73.95	58.07	67.06	58.8	64.11	82.7	68.4	47.7	49.01	60.85	69.93	63.43	70.96	50.64	74.4	65.19	88.2	50.08	68.38	68.09	67.55	50.7	113.81	54.41	47.63	48.22	58.31	43.09	63.52	62.52	52.21	40.89	42.58	48.29	96.93	63.43	63.07
64965	MRPS9	16.13	19.13	12.78	15.67	15.12	15.32	19.65	20.69	25.12	32.34	19.4	17.19	12.37	28.83	15.29	10.35	19.62	11.62	16.73	17.41	16.59	20.91	24.44	9.24	23.88	21.07	19.2	24.31	17.3	20.5	22.07	31.84	21.91	33.94	19.32	17.89	12.29	22.98	16.32	14.92	18.62	18.47	13.02	18.19	17.14	26.78	16.57	23.47
168448	CDC14C	22.19	27.67	19.9	19.39	20.08	29.26	13.58	18.87	24.23	17.46	24.57	33.79	24.59	20.64	33.93	25.73	35.05	28.07	14.27	20.47	35.87	35.74	31.73	31.21	15.39	28.65	25.57	33.28	25.32	37.94	39.57	27.38	20.61	39.25	21.63	23.21	34.85	29.01	13.24	20.66	25.27	18.04	16.95	11.12	16.25	36.16	33.12	20.24
23598	PATZ1	24.99	37.89	23.62	27.21	18.73	24.16	23.43	58.49	37.9	31.56	18.44	28.87	21.25	31.57	25.64	14.61	31.62	23.8	35.07	36.27	18.68	21.25	26.2	21.6	30.41	39.87	24.35	21.97	13	28.97	47.67	41.46	19.17	65.82	10.54	15.69	9.49	19.56	28.49	17.95	25.5	23.04	17.98	11.38	29.11	63.56	22.94	15.08
22807	IKZF2	34.39	29.31	33.68	11.12	42.63	10.98	5.99	30.47	12.64	7.23	43.47	14.59	8.93	9.15	27.31	8.61	20.88	17.75	5.41	10.88	20.43	14.87	7.93	12.11	7.18	17.71	9.14	15.47	38.98	7.78	25.2	42.87	20.87	7.53	56.68	3.32	62.87	5.85	5.93	7.43	16.55	6.14	35.22	4.43	7.59	11.67	6.44	21.24
54455	FBXO42	22.31	18.79	24.21	16.74	21.49	19.81	14.4	23.91	21.4	19.63	20	20.81	17.88	18.97	21.68	21.27	24.12	22.76	21.97	18.51	25.91	28.78	22.13	17.36	18.03	17.77	21.94	27.17	19.68	21.32	22.86	16.16	19.99	17.79	18.06	17.81	21.37	16.96	15.29	18.54	20.21	15.15	21.88	14.46	17.38	34.63	19.06	19.3
54664	TMEM106B	39.09	46.24	28.65	31.5	29.75	49.68	32.94	38.44	41.4	37.83	37.99	49.77	46.55	43.94	42.9	33.71	55.8	39.92	33.4	35.49	38.68	61.66	52.22	52.89	42.59	50.33	48.56	52.99	34.7	57.89	51.19	52.58	39.72	56.64	30.6	30.07	38.65	43.91	37.2	39.01	46.02	36.75	29.17	20.83	28.77	54.25	51.08	32.24
5017	OVOL1	31.42	41.77	46.85	13.59	71.5	7.97	0.16	9.97	7.13	8.88	42.91	17.77	1.53	17.72	21.6	88.57	20.47	17.33	0.78	4.07	76.54	6.53	0.58	0.24	0.17	4.55	0.32	50.01	46.13	0.23	0.17	39.02	14.61	5.02	48.54	69.38	70.44	32.76	0.45	0.34	7.69	0.33	36.8	35.33	3.1	22.01	0	68.01
146754	DNAH2	7.13	17.97	4.64	10.96	6.91	8.62	6.94	8.9	13.24	11.64	8.49	12.55	14.84	16.14	9.3	8.94	13.97	20.95	6.74	7.88	12.29	16.35	12	19.57	6.62	33.73	10.71	30.75	8.38	13.34	18.84	16.91	7.4	19.38	7.09	7.47	15.45	11.59	8.92	9.05	12.53	6.99	8.91	7.99	8.13	23.05	14.75	6.89
4043	LRPAP1	39.63	47.77	34.28	46.34	33.76	43.03	36.26	39.17	42.3	40.52	49.45	56.49	52.87	32.45	51.65	45.84	62.6	49.77	38.61	36.32	56.89	52.74	56.38	63.78	33.48	67.97	56.48	52.31	46.76	54.11	71.01	35.89	36.45	60.16	45.88	54.63	56.87	54.77	37.4	52.48	70.82	41.54	48.11	31.85	44.08	65.6	64.18	39.81
9522	SCAMP1	30.6	28.93	22.59	28.25	24.07	34.4	29.53	27.95	28.17	23.39	25.82	33.98	26.6	26	31.18	24.06	30.06	28.81	27.95	30.36	28.2	42.37	29.94	30.8	35.13	31.98	35.71	37.07	25.07	36	27.85	25.7	31.89	39.01	32.74	21.56	25.18	25.55	33.29	30.88	29.82	26.78	26.97	30.17	25.44	36.35	33.37	29.97
134829	CLVS2	0.16	0	0.04	0.09	0	0	0.08	0.07	0.04	0	0	0	0	0	0.39	0	0.11	0.05	0.33	0.23	0	0.11	0.05	0	0.08	0	0.31	0	0	0	0	0	0.13	0	0	0	0	0	0.19	0	0.11	0.08	0	0	0.08	0	0.11	0.04
100528062	ARMCX5-GPRASP2	5.82	7.47	4.5	5.84	4.29	5.25	3.31	9.68	5.42	5.49	5.97	8.36	10.23	4.77	4.33	9.29	5.57	5.98	6.56	1.9	5.39	8.04	5.99	3.58	6.63	8.23	7.66	7.64	7	7.87	4.76	5.02	8.02	15.78	5.51	4.96	4.41	5.46	9.32	7.62	7.17	9.92	5.82	4.74	9.19	11.76	8.28	2.7
728568	C12orf73	4.14	3.79	3.13	2.94	2.45	4.77	2.76	8.22	4.45	5.61	6.04	8.99	5.09	4.79	4.08	3.65	6.75	8.61	4.78	4.1	4.13	7.2	5.84	4.19	3.06	6.57	7.08	7.77	4.57	5.82	6.51	6.07	5.42	11.21	2.41	2.3	4.33	3.85	4.4	3.5	4.62	4.93	2.1	2.48	4.57	33.77	7.18	4.37
2745	GLRX	14.29	21.05	14.82	24.6	10.82	21.47	26.11	20.1	26.17	11.47	9.19	23.59	30.41	12.29	21.61	18	26.89	38.1	15.7	40.12	12.95	26.44	16.65	42.86	32.58	6.53	27.04	14.41	7.34	20.23	45.16	31.44	20.17	6.3	7.08	9.78	15.71	1.81	22.92	26.26	16.07	36.21	11.88	25.94	44.09	8.76	17.86	10.66
8665	EIF3F	53.82	46.85	52.79	50.13	42.99	43.83	58.31	37.17	53.02	45.3	55.32	57.49	54.69	39.01	65.18	46.15	49.98	43.97	65.01	56.4	36.59	43.74	59.35	52.97	53.25	56.98	68.56	48.45	55.15	64.59	76.24	62.77	54.73	72.91	40.71	37.12	41.55	40.33	61.47	53.78	51.39	49.63	40.47	33.3	45.53	41.05	59.96	35.73
166012	CHST13	0.24	1.08	0	0.27	0.2	1.82	1.82	1.51	0.76	0.22	0	0.31	1.81	0.64	0.58	1.4	0.65	4.25	1.53	2.5	0.29	0.65	0.61	2.03	0.93	0.33	0.62	2.39	0.5	0.32	0.65	1.51	0.77	0.33	0.25	0.33	0	0	0.9	0.33	0.95	2.3	0	1.5	0.68	0.32	1.96	0.25
2981	GUCA2B	0	0	0	0	0	0	0	0	0	0	0	0	0	0	0	0.94	0	0	0	0	0	0	0	0	0	0	0	0	0	0	1.1	0	0	0	0	0	0	0	0	0	0	0	0	0	0	0	0	0
84636	GPR174	2.36	8.53	8.49	1.62	2.76	1.81	0.4	3.94	9.31	0.67	3.11	2.3	0.52	0.18	1.14	0.85	7.79	5.17	0.57	11.75	4.26	3.39	1.18	7.04	1.42	0.58	0.54	2.59	2.59	0.83	34.95	3.28	2.34	0.72	1.42	1.28	1.59	0.37	0.59	1.42	2.34	1.8	1.92	2.18	5.05	1.25	0.57	1.31
7220	TRPC1	22.4	17.26	14.69	22.86	14.68	18.28	32.5	12.3	18.97	15.02	19.7	37.55	33.78	15.51	31.94	20.21	26.68	19.27	35.43	20.62	22.16	30.34	50.37	33.07	31.23	23.1	45.01	21.93	19.39	50.15	23.77	19.02	35.62	35.92	21.73	23.04	25.82	30.3	30.86	36.17	48.72	27.29	20.05	12.84	23.82	28.26	45.64	15
1906	EDN1	19.26	9.18	10.99	48.26	10.03	7.54	3.88	16.3	16.08	5.71	6.74	9.03	19.38	2.42	10.53	10.43	19.03	24.31	5.87	16.7	17.01	15.8	4.86	8.03	14.19	12.11	13.55	5.04	10.03	14.85	6.19	2.9	6.05	7.18	16.44	10.81	23.37	7.36	11.65	10.14	17.34	21.43	9.84	12.96	8.58	83.14	8.12	9.35
1361	CPB2	0.55	0.63	0	0.31	0.24	0.61	0	0	0.3	0.51	0.27	0.72	0	0.99	0.34	0.65	0.76	0	0	0	0	0.38	0	0	0.27	0.39	0	0.35	0	0.37	0.38	0.25	0	0	0	0.38	0	0.6	0	0	0.37	0.27	0	0.58	0.79	0	0	0
116135	LRRC3B	3.3	0.36	0.85	0.36	0.83	0.3	1.18	0	0.87	0.1	0.13	0.42	0.78	0.05	1.34	0.08	0.44	0	1.94	0.52	0	0.44	1.85	0	1.26	0.09	1.27	0.4	1.07	1.81	0	0.06	1.39	51.32	0.34	0.07	0.07	0.08	0.91	0.88	2.7	1.25	1.07	0	1.29	0	0.89	0.07
54811	ZNF562	68.56	95.25	69.07	73.82	63.32	76.99	44.46	76.26	80.85	75.97	88.8	95.16	78.45	68.5	85.29	80.43	120.73	90.14	47.22	56.19	101.54	113.18	84.3	94.12	52.16	116.23	90.28	122.97	93.4	95.94	112.44	106.89	68.31	109.7	90.6	74.69	98.63	99.25	50.24	66.65	97.41	56.92	67.35	65.37	52.82	138.25	91.97	64.35
6164	RPL34	769.74	434.97	801.63	330.4	763.59	415.38	601.29	493.57	681.56	540.13	611.15	438.4	549.59	667.19	680.81	401.49	569.76	360.61	627.18	649.69	293.24	553.22	463.35	570.01	497.2	351.16	641.28	584.32	893.88	705.32	896.53	532.94	733.08	795.72	481.93	227.66	319.66	246.79	684.95	390.67	317.96	606.65	585.59	683.26	1006.68	316.42	444.07	408.67
339366	ADAMTSL5	24.2	26.61	27.53	19.93	21.43	22.65	11.69	4.92	14.32	14.97	31.32	15.06	15.33	19.72	23.74	20.96	24.63	24.94	12.88	8.84	30.66	17.58	13.24	13.74	9.74	16.98	16.74	19.1	23.58	17.89	12.98	15.58	17.55	14.92	40.5	15.72	37.05	25.82	12.3	14.48	30.31	8.75	26.03	17.87	14.48	25.24	19.64	26.28
23492	CBX7	70.6	34.01	58.4	46.66	44.99	30.64	140.18	39.83	48.33	28.15	36.37	118.89	87.9	10.87	80.17	19.2	48.13	40.48	188.27	91.6	30.8	61.07	155.47	50.84	127.16	10.17	133.79	17.15	31.24	148.29	57.31	22.19	101.53	31.03	39.2	11.46	37.46	15.05	145.93	100.75	107.94	145.48	33.64	8.91	81.13	31.71	159.13	33.21
10989	IMMT	56.57	65.41	51.76	65.25	54.57	66.82	78.76	70.76	91.31	125.55	65.2	72.01	56.89	57.84	62.23	48.19	69.3	60.96	81.61	76.62	51.17	66.25	81.8	46.36	78.52	79.01	67.5	114.68	50.18	74.59	72.01	109.81	58.45	95.13	76.98	75.87	50.96	86.91	78.2	62.88	59.22	61.98	41.36	55.9	49.94	105.28	58.93	60.6
441250	TYW1B	5.04	5.71	4.69	3.24	4.53	4.04	3.66	5.89	8.86	11.17	5.26	5.21	2.87	1.83	5.43	5.93	13.83	12.71	5.67	7.1	7.35	5.5	3.8	5.89	2.81	3.82	3.29	16.45	4.79	1.65	6.1	2.84	6.24	8.52	3.63	2.12	6.77	5.03	3.17	3.32	9.7	5.32	6.51	2.62	5.29	12.58	3.16	5.21
26539	OR10H1	1.64	4.46	4.73	2.84	1.06	2.12	2.07	0	0.58	3.26	3.16	2.02	3.57	2.17	2.34	1.95	1.19	3.84	2.2	0.17	3.52	1.59	3.48	0.18	2.65	3.21	4.03	2.05	4	2.31	4.11	3.64	1.69	3.19	4.3	4.03	5.04	2.57	2.65	2.04	2.84	0.95	1.53	0.95	0	2.9	1.33	2.63
646174	C16orf90	170.23	147.98	173.55	69.82	140.07	86.37	91.13	62.58	151.46	130.13	128.7	82.69	76.68	144	102.68	89.76	107.08	107.2	110.96	126.9	57.93	82.11	79.38	95.62	70.82	69.91	73.84	150.67	156.92	103.85	156.12	147.52	83.97	161.13	93.46	164.57	55.43	77.41	87.07	61.34	50.71	85.4	87.16	106.23	109.88	141.55	64.64	95.45
56893	UBQLN4	44.56	70.58	50.67	59.55	54.28	46.04	43.44	84.6	91.43	116.41	67.57	59.67	32.36	75.52	44.31	46.89	73.54	71.95	49.57	53.74	97.64	58.12	38.18	38.39	47.14	80.55	48.75	91.64	38.43	36.59	44.25	71.13	40.02	82.39	47.8	67.11	51.64	104.47	39.73	48.26	53.78	39.54	49.22	54.33	33.14	77.12	44.67	84.74
54953	ODR4	16.57	17.95	14.91	23.86	15.46	19.37	13.22	23.53	32.26	20.18	17.3	17.45	18	17.58	16.87	13.29	24.05	14.92	13.43	13.35	32.68	21.71	18.8	18.68	19.22	19.04	16.44	20.45	12.2	16.81	19.53	27.07	23.66	24.99	19.05	10.91	19.28	34.51	18.98	24.11	13.35	19.03	20.39	20.25	16.55	34.89	19.06	23.81
55471	NDUFAF7	54.41	62.17	50.74	69.94	44.24	72.21	52.4	46.06	72.44	57.8	81.12	87.3	76.8	50.74	82.2	64.37	98.06	71.87	53.05	56.97	94.93	95.04	88.12	105.25	51.83	125.13	79.38	104.93	76.03	91.13	115.52	68.39	72.99	109.74	86.46	71.64	105.25	90.61	52	72.97	109.23	56.85	80	55.16	56.52	98.19	95.56	66.95
105374103	LOC105374103	13.35	12.96	13.23	9.77	10.89	9.12	7.15	20.07	17.89	21.76	17.42	21.15	11.44	16.83	18.67	11.11	22.46	10.48	10.49	10.61	13.18	16.7	20.71	16.07	10.99	17.13	12.98	17.05	19.02	17.65	18.35	14.7	8.41	22.46	17.2	6.27	17.93	12.31	11.53	12.91	19.05	6.85	16.63	5.58	9.34	10.93	20.97	8.89
340547	VSIG1	56	83.76	51.18	90.01	45.3	69.46	51.5	56.83	69.76	62.92	89.52	109.58	93.92	50.11	87.47	80.97	115.44	94.2	45.18	50.19	113.6	86.72	92.95	117.25	48.23	134.15	95.89	114.13	75.82	105.36	127.51	62.47	55.23	117.92	86.01	85.81	92.45	99.25	39.38	83.23	116.73	47.65	119.06	52.59	61.81	128.17	105.95	67.17
4007	PRICKLE3	42.17	98.2	44.11	52.03	51.95	46.99	21.77	63.62	57.95	63.4	61.46	44.99	32.3	55.19	42.63	51.3	63.1	68.07	24.61	34.74	53.25	43.05	28.13	43.53	27.9	97.35	35.8	65.64	56.39	34.58	48.01	74.99	31.33	56.54	54.11	71.8	59.85	47.87	23.66	42.55	46.47	29.18	41.24	37.51	29.5	94.63	39.71	53.05
4246	SCGB2A1	0.94	0	4.21	0	0	0	0	0	3.03	0	0	0	0	0.84	5.77	0	2.58	0	0	0	0	0	0	0	0	0	0	0	0	0	0	3.42	0	0	0	0	0	0	0	0	0	0	1.84	0	0	0	0	0
118426	BORCS5	36.72	41.22	26.91	38.35	28.17	30.56	28.55	35.37	37.57	32.22	45.37	44.44	40.11	41.71	43.89	41.52	52.09	37.87	34.13	34.44	45.66	49.95	40.63	46.18	30.38	52.42	42.02	48.94	38.72	42.4	58.7	35.71	33.78	86.21	27.36	29.79	41.17	51.73	24.17	35.53	43.99	24.33	37.34	25.27	29.3	43.06	48.59	33.31
333929	SNAI3	3.91	5.64	8.44	2.65	3.39	3.16	2.27	3.34	5.07	4.15	1.69	4.82	3.33	3.53	3.54	2.48	8.28	7.19	3.62	8.28	5.74	5.39	4.01	12.31	4.37	1.85	3.79	3.95	2.19	2.82	17.34	2.86	1.42	1.1	2.79	1.44	1.47	0.31	2.24	2.17	3.5	2.8	4.36	1.66	8.56	2.82	2.89	2.49
197021	LCTL	23.21	32.24	20.3	34.83	19.95	29.07	18.5	18.76	30.69	32.61	38.19	35.41	33.18	18.78	29.83	33.24	38.61	34.33	21.31	21.49	37.2	41.23	38.66	39.21	16.6	56.55	39.29	35.16	32.11	30.82	50.85	25.13	21.53	37.36	25.68	30.01	42.41	39.54	15.19	32.66	54.62	21.21	28.93	26.12	24.97	41.84	35.24	29.44
165257	C1QL2	0	0	0	0	0	0	0	0	0	0	0	0	0	0	0	0	0	0	0	0	0	0.33	0.3	0	0	0	0.31	0.3	0	0	0	0	0	0	0	0	0	0	0	0	0	0	0.23	0	0	0	0	0
5872	RAB13	71.06	70.72	71.87	115.97	74.32	109.06	102.56	100.09	102.11	120.35	74.41	101.59	98.87	87.74	93.09	108.11	83.41	125.6	80.1	118.21	43.52	105.38	86.23	98.94	109.04	79.48	92.67	83.74	83.41	118.49	58.71	116.95	87.99	105.84	85.87	53.31	67.94	72.96	90.59	115.3	80.34	142.65	72.34	82.72	102.97	96.32	129.04	89.6
142827	ACSM6	1.59	2.41	0.71	0.3	2.3	2.05	0.26	0.97	0.86	0.74	5.74	3.15	1.01	0.24	1.63	0.31	4.02	1.27	0.25	0.51	3.89	1.83	0.68	1.14	0.52	0.75	1.75	3.01	2.5	0.72	2.57	0.97	0.58	0.74	1.98	1.83	3.73	0	0.51	1.1	6.04	1.03	1.04	2.25	1.02	2.51	2.57	2.54
26005	C2CD3	12.55	29.61	12.91	20.59	14.77	20.1	14.4	25.8	28.12	29.66	14.84	19.6	16.1	38.3	16.36	12.99	22.43	17.26	12.76	19.29	26.44	22.8	16.32	22.36	16.49	29.99	17.73	15.49	13.01	17.07	33.94	11.18	15.02	18.5	15.08	6.5	14.77	14.85	16.36	15.88	22.13	15.17	15.93	19.95	16.34	19.94	18.7	20.02
221079	ARL5B	14.39	20.67	14.54	22.21	14.81	16.52	38.45	25.27	17.19	13.1	12	18.32	39.46	27.07	14.29	19.4	15.5	17.69	20.97	19.19	27.56	19.79	25.27	22.41	21.51	22.67	16.81	21.94	10.73	16.49	17.17	39.73	22.43	23.17	22.04	15.26	9.96	13.52	22.2	19.2	11.57	17.19	12.67	23.42	16.67	16.42	14.86	32.11
10657	KHDRBS1	104.97	115.83	95.45	102.82	89.95	115.34	117.35	141.4	131.67	118.07	99.97	108.62	109.2	151.2	105.66	110.95	131.34	123.06	129.1	137.9	89.8	125.91	109.46	95.5	114.71	122.6	111.72	112.54	87.97	118.24	138.59	163.04	117.43	175.57	102.43	128.03	82.39	150.66	113.21	103.86	94.31	120.67	64.94	100.11	97.59	168.28	98.46	93.75
59348	ZNF350	10.51	4.38	6.98	5.92	5.91	7.18	4.37	10.08	10.61	8.67	8.71	8.51	7.38	8.41	8.89	5.79	9.31	7.41	11.97	12.25	5.6	7.98	10.05	9.42	11.52	2.35	10.93	3.92	6.24	10.34	9.56	7.4	8.89	13.19	3.99	0.76	9.31	5.65	6.74	7.67	7.75	9.94	9.11	1	7.45	9.29	9.12	5.31
23710	GABARAPL1	88.07	38.35	49.63	76.55	32.09	60.3	117.99	56.85	55.21	46.87	27.53	122.86	155.59	67.27	82.86	43.31	42.7	56.53	104.6	79.73	26.92	59.77	123.55	100.28	113.7	60.25	166.17	40.87	36.14	120.87	11.57	66.93	115.24	89.46	68.99	35.69	48.69	45.62	157.7	146.85	100.86	160.93	41.74	40.46	141.37	43.74	151.9	49.43
128864	C20orf144	1.86	3.19	1.68	3.15	0	6.17	0.9	5.97	4.03	6.11	2.02	6.15	3.57	2.52	5.75	3.32	5.15	5.59	1.72	0	1.14	5.14	5.98	5.33	1.84	9.26	3.69	9.43	2.94	5.04	6.46	4.25	3.04	5.22	3.98	1.29	2.63	4.5	0.89	1.29	13.75	3.64	0.92	0	2.7	21.43	3.88	0.99
92715	DPH7	22.6	23.24	17.87	25.2	19	33.45	14.41	24.02	26.5	38.11	22.31	29.81	15.26	30.35	23.78	24.7	31.42	23.34	23.44	21.93	36.54	32.06	25.85	29.05	17.33	37.79	28.01	31.1	18.99	34.3	33.99	32.81	19.63	28.49	19.76	29.14	30.49	40.52	16.26	25.64	38.49	14.45	30.12	27.88	21.03	47.7	28.52	27.97
503835	DUXA	2.28	7.76	2.97	9.56	5.2	12.81	2.75	30.41	11.03	17.93	5.07	11.13	3.33	21.5	6.51	8.99	18.13	8.48	0.82	5.5	6.18	7.07	5.64	12.04	2.12	7.06	7.85	21.73	7.99	6.66	12.14	19.27	2.62	43.32	2.78	16.84	3.28	21.61	4.04	5.69	7.19	3.21	3.15	3.76	1.84	13.14	2.39	20.76
6156	RPL30	1367.49	1706.98	1392	748.86	1377.04	1614.48	1106.57	2284.11	2299.56	2738.21	1376.32	865.7	894.81	2077.17	996.27	769	1171.4	1046.71	1023.62	1343.39	764.88	1715.38	710.3	966.2	992.35	839.87	968.97	1841.84	1156.27	1060.96	1694.77	1375.84	1058.79	1260.3	1074.08	896.27	428.81	717.64	997.22	667.32	475.29	1037.02	935.67	1369.29	1234.82	2084.51	608.7	1017.87
3111	HLA-DOA	18.78	40.12	23.96	14.36	15.68	27.76	14.52	22.7	38.95	12.49	23.49	30.99	24.27	8.16	27.06	16.2	44.12	34.14	23.1	80.65	36.66	38.7	15.86	61.6	19.07	19.5	23.12	21.17	23.82	22.95	140.4	24.83	26.25	108.1	16.85	18.93	13.29	12.27	18.11	19.32	20.52	40.71	16.22	20.53	41.49	18.28	19.36	14.48
125893	ZNF816	8.01	7.69	5.49	4.22	5.52	5.15	3.45	12.32	5.83	6.43	5.59	3.34	2.35	5.94	5.99	6.57	6.31	5.19	4.42	6.18	6.17	8.33	4.97	6.18	5.89	3.65	6.3	10.53	5.35	6.47	8.44	12.1	7.35	9.48	6.38	0.53	6.32	6.9	4.21	2.46	3.83	5.15	11.63	5.94	5.23	2.94	3.22	3.03
10845	CLPX	63.67	71.95	62.24	67.74	60.94	81.33	52.15	65.35	80.2	67.38	79.16	89.97	71.8	48.02	80.25	82.13	95.52	72.83	64.03	62.46	88.8	78.28	87.14	91.58	55.29	95.57	86.6	88.52	80.51	89.56	96.03	56.67	65.87	85.77	75.48	70.66	98.84	75.37	54.66	77.2	96.42	62.83	78.83	51.11	57.92	99.12	87.18	74.02
440387	CTRB2	0	0.61	0	0	0	0.59	1.35	0	0.29	0	0	0	0	0	0	0	0	1.29	0	0	0	0	0	0	0	0	0	0	0	0	0	0	0	0.38	0	0	0	0	0	0.74	0	0	1.23	0	0	0	0	0
913	CD1E	7.84	5.45	5.41	0.45	4.95	3.06	0.48	1.74	6.56	3.83	4.64	2.05	0.62	0	1.8	1.9	7.27	4.26	0.86	2.4	2.7	14.26	1.33	1.35	0.79	1.05	2.11	5.59	7.83	0.71	11.14	0.73	5.17	2.06	4.71	0	1.87	0	1.13	0.55	1.07	0.49	5.57	3.15	3.94	0.54	0.37	3.88
23347	SMCHD1	39.05	40.18	37.73	33.2	29.38	37.47	35.3	53.8	66.54	36.17	26.16	44.97	45.48	34.19	34.24	23.91	58.41	51.61	37.91	61.78	43.6	48.03	41.83	77.54	65.4	45.96	38.79	72.48	24.02	43.84	115.49	61.62	52.78	54.9	37.29	21.13	37.76	28.89	45.95	41.72	44.74	45.21	32.36	24.07	44.05	50.44	38.77	34.37
100506084	ARL17B	96.76	97.68	108.46	107.11	93.53	60.23	81.22	59.95	94.27	67.86	112.95	112.01	115.63	55.12	116.06	84	120.99	96.75	49.79	127.6	141.44	172.72	123.52	102.78	96.65	124.12	85.11	123.91	133.49	140.87	258.28	154.97	110.97	176.33	121.41	106.49	182.54	91.17	56	110.44	172.77	71.24	83.67	67.96	99.45	206.85	154.22	58.35
10721	POLQ	3.19	9.63	2.73	4.57	3.73	17.25	0.34	20.57	21.44	40.46	9.43	6.21	0.71	10	2.81	8.83	9.72	9.77	0.37	2.53	9.97	4.67	0.52	1.38	0.45	9.05	0.27	14.14	5.58	0.48	7.15	23.34	2.04	22.2	7.36	9.19	4.14	15.51	0.29	1.05	3.8	0.79	4.13	4.84	1.27	21.77	0.49	9.2
163351	GBP6	415.28	254.74	481.84	113.83	735	51.57	15.82	83.69	69.27	85.87	551.08	109.55	25.67	39.94	339.44	62.88	195.07	110.49	12.72	22.03	120.87	51.1	24.92	34.86	16.91	63.29	31.08	127.83	690.18	27.96	46.58	184.55	271.11	54.18	376.91	91.34	644.98	237.87	12.63	29.36	113.79	19.24	577.23	47.05	81.75	154.93	33.65	232.75
949	SCARB1	30.72	25.82	23.02	24.96	17.62	35.14	26.8	32.97	39.85	40.63	25.5	27.93	27.02	37.81	34.79	19.57	40.43	27.23	22.68	43.4	35.17	37.4	19.2	38.43	23.08	35.78	33.84	41.55	30.4	25.96	47.73	30.71	20.89	44.54	21.05	62.08	23.8	17.42	18.32	21.12	20.19	24.66	15.41	19.95	45.23	114.16	20.36	25.98
9779	TBC1D5	34.12	51.8	34.2	38.73	34.64	35.37	35.17	39.58	42.81	25.1	31.93	45.46	41.37	30.04	40.05	25.07	44.82	36.52	29.63	45.67	45.06	68.22	41.06	53.24	37.49	38.3	40.58	45.51	27.62	37.05	70.87	42.54	39.89	51.79	33.83	24.77	32.15	31.3	37.81	36.85	37.75	36.78	27.68	29.72	45.24	48.56	33.91	29.15
112267857	LOC112267857	6.58	1.15	3.65	1.97	6.15	1.28	2.94	1.5	1.64	1.63	3.29	2.01	6.47	1.05	5	2.76	4.9	1.82	3.76	4.39	1.24	3.49	5.85	2.9	3	5.03	4.69	0.74	7.45	7.07	0.81	1.06	1.9	36.54	5.95	3.51	5	3.06	3.88	2.42	4.76	1.7	7.48	1.23	1.12	0	4.22	1.74
30836	DNTTIP2	70.98	101.39	59.52	78.99	58.68	91.35	54.19	87.84	81.27	68.83	93.69	116.69	100.05	78.3	107.4	85.87	130.93	94.48	57.2	71.61	101.35	132.67	100.18	121.23	61.44	118.29	94.4	124.98	77.29	108.11	141.06	76.93	77.13	128.23	75.64	76.18	105.55	113.72	56.79	80.83	104.67	59.97	70.83	58.01	51.44	132.37	102.12	84.04
2264	FGFR4	5.91	2.52	5.58	4.69	3.07	3	1.39	3.7	8.46	12.86	2.42	1.75	1.84	8.66	6.5	2.45	5.74	1.34	3.55	4.69	2.89	0.66	1.89	0	2.05	1.36	2.15	0.2	4.03	1.51	2.43	5.58	0.7	7.37	2.39	12.69	2.22	12.49	1.41	2.27	2.97	3.03	18.34	3.76	2	9.72	1.77	6.88
26205	GMEB2	17.34	21.84	17.67	19.33	20.99	27.14	17.42	35.31	28.18	33.01	19.91	21.8	18.07	16.24	17.34	16.14	21.46	18.1	18.83	20.86	23.1	16.28	19.58	18.49	15.51	28.48	17.39	20.29	14.15	18.55	19.64	29.71	15.24	31.67	17.82	26.27	19.57	36.42	17.42	23.5	19.67	17.34	16.19	14.43	16.8	29.86	22.27	19.78
2326	FMO1	15.72	6.99	7.01	13.82	4.56	3.96	3.98	1.45	7.93	6.06	3.5	6.95	9.54	5.88	5.63	23.16	40.17	16	1.85	10.38	4.3	5.67	0.64	24.9	3.55	1.12	0.6	11.09	0.99	3.22	1.88	2.97	2.18	0.96	17.46	2.73	2.71	8.46	2.87	2.78	1.68	3.91	0.25	4.86	4.92	0.61	4.52	3.56
100129543	ZNF730	1.21	0.35	0.65	0.97	0.64	2.56	0.46	0.49	0.33	0	0.95	0.96	0.42	0.74	0.63	1.22	1	1.15	1.27	0.29	0.18	1.42	1.43	1.89	0.61	0.65	0.2	0.39	0.64	1.08	1.39	0.75	0.54	0.8	0.47	0.85	0.77	0.37	0.45	0.59	0.9	1.22	0.77	1.29	0.79	1.04	1.5	0
729597	SPDYE6	2.33	5.36	2.17	4.49	1.71	2.16	0.82	2.88	6.61	6.36	2.41	1.46	3.22	2.3	5.56	3.25	1.06	5.25	0.58	0.64	3.9	1.86	1.71	3.03	1.5	3.11	2.94	5.57	3.51	2.76	1.1	2.03	1.18	4.96	1.46	7.37	4.92	13.94	1.02	2.71	0.15	0.71	3.38	3.28	2.32	6.29	1.75	1.67
9759	HDAC4	35.3	29.74	39.2	40.93	35.54	24.88	62.15	26.94	25.37	13.54	40.38	62.94	67.98	13	55.21	37.92	40.41	28.04	95.59	49.8	38.8	49.09	103.41	37.02	70.47	32.95	95.98	23.23	28.41	69.56	38.32	13.22	57.79	43.92	44.94	19.17	53.31	113.95	82.6	65.65	78.09	56.33	27	16.72	38.58	30.11	75.55	33.09
29979	UBQLN1	86.91	88	89.09	100.69	88.48	114.6	94.18	145.61	131.54	170.33	90.5	99.43	91.12	153.16	84.21	97.09	87.2	98.98	102.08	113.55	92.82	92.32	86.9	82.07	110.13	86.56	105.42	93.73	81.09	105.13	115.29	165.77	111.92	87.77	102.57	171.41	86.35	98.52	109.17	99.12	83.26	125.18	73.79	127.32	86.65	73.54	97.32	110.58
55486	PARL	26.13	50.76	22.52	33.71	33.11	57.98	43.01	57.01	56.1	74.1	39.52	47	34.42	65.69	32.21	31.64	36.89	29.85	46.84	58.29	47.17	54.69	33.8	32.97	30.23	50.77	43.68	34.65	28.08	33.18	36.28	90.43	37.57	60.48	29.5	56.41	26.34	38.6	35.52	37.91	27.33	40.46	20.22	48.25	35.3	35.96	37.93	44.04
2590	GALNT2	45.38	118.88	45.49	104.65	54.34	98.25	107.36	62.35	57.06	74.35	54.06	89.82	88.67	93.43	71.18	84.71	77.91	76.08	100.91	83.32	49.43	70.86	99.64	99.77	103.88	95.17	103.3	59.92	45.15	78.31	40.51	40.32	77.15	119.34	50.06	116.34	40.99	117.32	91	78.37	83.83	96.1	42.12	64.99	52.72	50.19	83.08	58.72
84080	ENKD1	15.06	12.51	12.49	19.72	12.52	11.11	26.91	6.62	12.98	9.89	14.88	21.78	22.58	29.9	23.26	19.75	14.29	18.79	40.99	17.3	17.57	16.7	33.74	17.92	29.25	10.7	30.72	20.18	13.37	27.21	4.94	10.98	21.8	24.66	15.24	6.78	16.43	17.09	28.51	27.3	36.14	22.01	14.67	10.06	18.94	4.91	29.5	11.02
7092	TLL1	9.13	2.08	6.26	14.46	3.4	9.52	14.21	2.9	10.33	2.53	5.24	17.65	29.25	20.11	8.15	6.3	6.92	11.5	14.66	14.63	3.3	11.49	11.47	26.02	15.43	17.09	16.61	8.4	5.49	15.69	3.84	0.35	12.14	2.22	4.69	0.52	5.29	33.9	14.3	19.72	18.62	15.83	2.65	13.22	22.86	1.09	10.16	4.36
5930	RBBP6	72.04	75.27	57.05	64.61	50.54	72.02	98.99	78.58	60.72	41.28	69.2	78.35	117.77	78.81	77.87	65.37	71.6	71.46	112.4	77.65	59.51	64.52	162.58	66.58	99.94	70.01	78.13	55.21	55.22	67.15	78.7	63.68	85.26	104.67	67.85	61.95	55.22	69.94	84.05	122.54	83.06	86.54	47.61	41.52	74.77	49.34	90.42	48.42
4342	MOS	0	0	0	0	0	0	0	0	0	0	0	0	0	0	0	0	0	0	0	0	0	0	0	0	0	0	0	0	0	0	0	0	0	0	0	0	0	0	0	0	0	0	0	0	0	0	0	0
27245	AHDC1	93.48	93.23	95.13	68.4	95.96	58.45	62.2	64.24	43.31	36.56	90.44	64.55	62.65	49.5	103.74	71.74	69.93	67.5	70.3	61.59	116.22	49.65	81.06	54.28	66.74	38.58	70.48	97.21	116.53	64.64	26.32	76.49	60	68.54	63.62	40.49	140.25	44.35	70.45	65.02	108.85	50.95	95.3	61.08	40.07	46.89	67.77	65.49
8785	MATN4	1.5	0	0.21	0	0.4	0.5	1.27	0	0.63	0.93	0.23	0.51	0	1.03	0.95	0.27	0.32	0	0.42	0.22	0.28	0	0	1.31	0.23	0	2.42	0	0.2	1.05	0	0.59	0	0	0.24	0.63	0	0	0.44	0	0.52	0	0.19	0.49	5.07	0	0.32	0
26958	COPG2	15.14	23.61	17.61	14.35	17.22	17.18	13.94	19.36	18.68	20.33	19.2	15.85	13.68	25.78	18.33	20.87	22.89	21.26	13.89	20.37	11.19	18.13	14.48	10.63	14.94	12.57	13.41	24.21	18.32	16.8	15.64	38.23	14.31	34.45	12.98	18.21	20.14	22.76	14.04	11.87	13.8	10.32	15.46	25.48	13.66	38.27	11.7	17.32
26033	ATRNL1	14.29	19.25	14.03	16.59	12.72	15.47	13.18	9.91	13.33	11.67	17.25	22.06	17.06	11.13	18.75	15.12	26.79	16.58	11.93	11.05	17.25	25.71	19	19.21	12.52	20.17	21.28	21.2	17.22	18.06	23.25	12.41	18.71	48.45	13.87	13.07	19.51	16.57	10.02	12.05	19.24	13.82	12.41	7.96	11.99	160.68	18.21	12.94
22911	WDR47	22.08	18.93	21.48	16.78	21.14	15.08	17.75	21.1	12.67	13.71	17.33	19.62	14.29	11.06	18.61	18.02	16.68	21.46	20.65	17.17	20.62	18.04	16.77	12.47	18.22	12.35	19.95	20.03	23.47	19.01	7.68	13.75	25.88	12.66	24.91	20.16	22.49	25.82	20.87	14.4	18.27	20.07	24.7	23.02	18.9	29.82	16.47	34.05
10908	PNPLA6	39.4	45.86	47.39	83.72	43.57	49.62	49.24	57.16	47.22	50.57	41.87	50.19	44.78	38.6	50.72	38.89	50.84	60.47	57.61	64.71	50.06	52.32	51.54	50.13	48.31	58.8	58.89	57.11	42.66	53.46	64.82	45.85	42.08	35.56	46.22	40.4	41.61	35.83	54.15	62.93	58.54	69.54	51.48	71.62	57.8	54.78	72.77	55.39
79875	THSD4	91.71	47.84	90.95	30.74	88.4	20.49	13.94	8.07	34.51	13.21	150.51	17.38	13.19	4.31	40.18	4.94	85.4	22.6	7.17	9.31	20.88	12.29	4.81	16.34	8.71	8.16	9.35	19.32	121.84	5.52	4.14	2.18	36.33	30.44	81.13	17.64	62.56	11.09	6.6	11.88	60.04	5.73	72.36	5.44	39.03	12.53	10.04	46.07
4713	NDUFB7	201.08	216.54	228.07	265.41	209.74	181.14	293.86	259.16	177.69	280.04	255.04	232.62	190.99	182.19	235.12	173.55	250.96	195.18	320.5	193.99	157.69	171.36	224.06	159.04	236.59	225.24	253.99	264.03	202.63	238.95	169.8	276.49	216.49	139.89	186.97	237.87	203.9	246.19	280.81	240.1	256.7	261.68	193.7	294.19	251.38	221.32	207.44	221.46
10536	P3H3	22.35	15.37	12.9	57.98	8.29	31.45	28.69	22.97	15.31	7.03	9.62	19.16	25.93	33.1	17.05	42.14	10.61	28.87	31.9	40.77	4.38	22.11	27.59	42	15.32	18.89	17.82	18.78	6.46	31.6	5.44	5.92	20.07	74.41	12.4	19.87	9.14	8.03	26.05	29.78	20.83	25.17	15.11	15.95	35.76	17.09	34.81	8.35
23012	STK38L	30.3	25.73	20.56	27.67	27.42	27.08	47.27	27.64	25.61	21.46	21.27	42.52	64.69	45.29	32.59	20.5	30.68	27.07	57.68	40.9	22.4	48.47	57.53	31.88	58.25	49.81	61.77	29.97	13.89	48.73	13.23	20.33	61.46	184.12	72.73	20.64	30.08	20.02	78.24	54.65	43.77	77.84	15.64	23.29	32.99	22.87	66.53	25.58
55285	RBM41	14.77	19.13	13.44	20.14	13.76	19.22	12.74	22.94	22.96	17.44	20.17	28.92	20.27	14.45	19.05	21.18	26.79	19.91	14.85	18.8	29.39	32.13	21.43	21.95	20.18	30.81	27.63	28.16	19.79	21.41	28.37	18.07	17.65	25.97	20.79	19.66	20.14	19.37	15.55	24.13	29.86	15.33	23.21	14.68	15.92	27.56	27	17.54
1586	CYP17A1	1.04	0.3	0.47	0.58	0.22	0	0	0.71	1.12	1.46	0	0.34	0.33	0.7	0.96	0.92	0.72	0	0.48	0.25	0.95	0.71	1	0	0.77	0.37	0.34	0.33	0.82	0.35	1.08	0	0.56	0	0.28	0.36	0.73	0.63	0.25	0.36	1.39	0	0.25	0	0.5	1.75	2.16	0.28
100130302	SUPT20HL1	0.18	0.4	0.59	0.42	0.45	0.23	0.17	0	0	0.16	0.28	0.23	0.55	0.42	0	0.21	0	0.28	0.15	0.51	0.31	0	0.23	0.34	0.18	0	0.25	0.17	0	0.13	0.15	0.13	0	0.17	0	0.13	0	0.12	0.35	0.11	0.21	0.88	0.21	0	0.1	0.3	0.53	0
101927345	LOC101927345	33.02	1.52	58.19	11.51	38.8	5.13	5.93	2.68	10.27	11.47	79.15	4.92	11.31	0	114.73	0	10.49	0	6.5	8.5	6.53	7.26	0	12.37	14.05	8.34	2.47	14.85	156.71	13.16	0.85	63.82	72.65	14.35	84.6	0.37	161.06	4.55	16.98	28.72	30.49	13.47	86.22	0	3.29	5.53	6.92	29.47
1823	DSC1	14.5	19.66	12.48	28.3	10.92	17.3	11.89	9.9	15.21	18.18	17.3	22.35	16.09	11.07	18.43	90.85	24.6	18.32	11.1	11.58	24.88	25.26	19.11	26.68	9.01	31.33	18.62	25.26	19.2	19.62	26.38	19.58	13.58	23.3	17.27	19.02	21.27	24.19	8.46	18.77	28.81	10.7	17.8	23.26	13.98	23.77	19.34	27.51
4496	MT1H	6.33	0	42.2	1.41	3.3	1.38	0	0	0	2.4	0	1.65	0	1.49	4.94	9.08	2.69	4.66	0	1.37	1.05	3.5	0	0	1.25	0	1.67	32.03	111.42	0	0	14.1	40.03	0	17.59	1.78	16.2	3.09	1.23	0	6.17	0	36.8	0	0.82	30.92	0	4.09
10438	C1D	7.03	8.48	6.87	7.87	5.75	11.31	5.25	15.09	11.44	13.62	5.89	6.64	3.59	11.06	6.2	9.55	7.78	8.92	6.88	10.46	7.38	9.42	8.26	4.89	11.9	5.24	6.38	11.19	7.39	5.98	10.31	13.22	8.75	17.19	7.31	8.91	6.84	7.18	4.99	5.76	6.47	7.46	2.97	7.68	7.18	7.61	5.3	7.27
222642	TSPO2	2.04	2.52	3.66	1.85	1.59	1.9	0.55	3.73	1.35	0.53	1.1	2.1	1.13	1.77	1.26	2.41	7.6	2.96	1.06	0.43	2.91	1.83	4.75	1.27	1.31	4.88	1.99	1.78	1.87	0.46	9.33	3.81	0.83	0.95	0	0.47	0.48	0.83	0.32	0	0.47	1.11	2.26	2.6	1.28	2.3	2.36	0.61
1893	ECM1	849.77	44.93	988.6	141.6	1108.05	133.89	49.67	21.43	38.82	30.17	832.61	82.26	49.81	46.58	586.3	125.65	62.3	153.95	32.8	48.68	165.56	36.86	38.88	114.95	69.25	16.77	45.62	73.35	1278.3	33.2	4.9	49.36	674.34	55.76	1298.78	57.7	1701.49	25.95	31.68	58.06	99.33	55.11	1035.45	109.52	76.92	11.94	37.66	293.91
144132	DNHD1	12.27	9.07	9.88	14.25	9.33	7.56	7.31	7.03	11.85	5.85	12.69	14.01	12.35	7.82	14.69	13.31	16.96	10.31	10.34	10.77	19.63	14.89	14.45	23.78	9.93	23.08	16.77	19.79	13.21	14.55	35.88	21.7	10.32	12.02	8.55	7.84	15.84	15.26	8.13	12.38	17.08	7.12	9.02	8.07	10.1	18.18	21.01	11.05
259249	MRGPRX1	0	0	0	0	0	0	0	0	0	0	0	0	0	0	0	0	0	0	0	0	0	0	0	0	0	0	0	0	0	0	0	0	0	0	0	0	0	0	0	0	0	0	0	0	0.37	0.52	0	0
7586	ZKSCAN1	98.45	118.1	85.99	92.63	80.36	96.16	72.15	122.62	115.8	95.94	109.87	117.93	96.61	68.1	121.77	87.24	184.13	123.8	65.03	84.21	117.57	119.1	91.39	119.87	71.55	223.86	102.34	148.97	119.85	101.31	120.05	112.38	88.55	127.68	104.98	84.85	143.5	147.68	71.61	95.71	135.27	74.44	130.9	65.34	92.51	153.02	117.92	92.24
51573	GDE1	47.68	51.56	38.8	49.57	46.91	62.98	93.06	81.89	53.92	63.67	48.44	62.97	66.59	71.08	64.11	57.66	62.77	66.79	95.89	68.19	31.66	46.93	75.89	40.15	97.67	64.95	80.18	54.81	37.7	77.13	38.17	90.61	62.74	86.6	42.83	45.28	27.61	44.66	98.91	78.36	55.18	74.03	39.75	40.75	40.46	24.29	67.55	43.66
25802	LMOD1	255.1	37.56	181.62	239.46	156.97	87.76	1135.29	95.09	70.25	17.66	99.87	609.05	558.93	21.22	432.11	60.44	108.78	67.21	933.09	364.93	28.36	222.42	931.61	56.42	1118.7	22.25	956.39	12.65	57.32	789.09	5.51	2.91	644.61	21.19	201.35	8.82	164.64	17.96	806.16	573.1	626.51	758.02	56.57	7	184.99	4.77	772.4	74.7
100507003	GFY	0	0	0	0	0	0	0	0	0	0	0	0	0	0.21	0	0	0	0	0	0	0	0	0	0	0	0	0	0.9	0	0	0.4	0	0	0.66	0	0	0	0	0	0	0	0	0	0	0	0	0	0
23553	HYAL4	5.93	12.01	4.74	12.86	6.09	10.09	5.12	6.71	8.88	8.44	13.35	10.58	14.32	6.72	12.88	11.52	19	11.99	5.54	5.74	17.3	15.56	12.54	16.48	6.82	19.61	10.45	16.27	11.35	11.61	19.3	7.65	6.91	16.16	8.95	11.52	13.57	9.15	4.38	9.73	18.26	5.99	11.47	8.04	6.85	16.84	18.04	8.68
54795	TRPM4	45.96	49.9	28.08	40.98	27.91	42.84	37.97	23.14	30.46	37.63	25.96	35.12	35.32	44.83	24.5	26.5	20.75	30.2	31.71	25.82	28.83	20.7	31.54	31.48	30.57	54.78	29.07	54.02	32.03	33.68	8.35	63.54	26.96	16.94	43.53	33.66	34.67	54.47	27.25	30.78	41.68	23.23	103.19	46.18	41.8	41.88	32.43	40.5
85452	CFAP74	0.15	0.17	0	0.23	0.13	0.15	0	0	0.16	0.28	0.09	0.2	0	3.49	0.23	0	0	0.49	0.17	0	3.38	0.13	0	0.68	0	0.26	0.09	0.12	0.68	0	0	0.15	0.1	0	0	0	0	0	0	0.12	0.12	0	0	0.2	0	2.12	0.13	0.09
63925	ZNF335	27.85	36.62	31.22	36.93	27.55	30.7	19.2	50.28	41.08	37.05	35.89	40.62	25.63	18.18	33.88	35.52	42.09	47.74	22.04	29.41	73.07	35.35	34.52	51.4	26.59	56.86	29.12	40.55	29.46	25.83	60.54	35.98	25.78	42.23	26.2	40.34	44.49	47.59	25.22	37.72	55.11	26.08	41.14	30.16	33.7	35.98	36.06	36.55
221830	POLR1F	11.11	14.5	7.12	12.03	8.25	26.94	13.73	17.21	18.46	23.29	12.42	12.41	13.47	30.72	10.75	10.21	15.04	11.14	16.44	14.91	11.22	16.75	13.24	9.19	16.06	18.87	15.3	17.54	9.28	16.88	10.8	28.58	17.72	11.41	9.31	11.76	6.95	21.86	20.78	13.81	10	13.1	6.88	14.36	12.62	11.01	10.98	16.1
7082	TJP1	90.63	51.84	94.89	61.75	108.7	66.15	73.86	72.72	68.02	76.55	71	70.62	68.54	40.06	88.14	68.84	64.79	50.02	65.18	64.15	68.22	50.94	65.71	52.8	83.54	27.45	79.46	36.83	84.01	72.84	15.55	40.32	100.03	35.84	108.6	52.36	127.28	79.53	82.45	70.97	71.43	77.28	78.34	35.77	51.54	33.67	69.18	70.18
844	CASQ1	3.13	1.37	1.3	2.72	1.88	1.33	17.92	2.87	0.78	0.68	0.52	4.14	15.08	0.87	108.77	1.14	1.33	0.87	32.11	9.52	0.88	4.32	25.97	1.03	17.35	1.71	5.73	1.22	0.76	25.39	4.67	0.22	12.33	0.68	7.21	0	1.02	0	25.75	16.02	3.56	2.82	0.24	0	2.09	0	6.69	0.51
6142	RPL18A	1599.96	1764.32	1742.23	1245.61	2042.62	1186.79	1219.75	1515.17	1773.1	1886.54	1911.08	1175.71	1122.53	2856.91	1359.29	975.66	1372.55	1497.4	1309.88	2014.26	1049.7	1459.88	839.99	1278.36	1108.67	2166.9	984.64	2648.22	1748	1065.73	2435.56	2170.44	1004.53	1783.6	1371.82	1116.93	622.14	1127.06	1173.6	938.83	726.55	1246.87	1279.17	3440.8	1554.37	1988.17	1069.21	1765.19
84224	NBPF3	11.81	16.72	9.34	12.71	9.65	13.57	8.61	17.1	11.99	11.59	16.28	13.47	8.18	10.92	13.36	8.52	10.99	9.64	14.26	10.83	14.15	15.09	12.42	11.81	10.8	19.7	11.4	19.44	14.51	15.93	13.3	14.26	9.46	17.88	9.47	11.92	14.73	12.58	6.93	8.95	17.28	9.01	12	5.86	10.13	21.09	10.54	7.26
4094	MAF	84.47	106.06	88.75	133.23	68.73	79.33	62.61	43.45	118.51	177.23	69.08	62.9	79.14	173.15	85.95	139.91	83.53	76.98	69.95	98.91	124.82	107.8	41.03	81.65	66.57	36.82	59.59	58.34	83.66	55.49	78.36	18.13	50.94	22.16	37.06	137.51	45.31	213.09	45.12	54.05	41.04	98.23	80.96	93.6	102.89	78.43	56.06	89.66
55540	IL17RB	12.34	18.81	9.31	17.84	12.7	18.14	11.87	11.74	18.85	10.83	18.39	21.4	18.9	15.31	18.42	19.39	27.91	19.54	11.53	12.52	23.42	17.51	18.37	25.71	12.03	23.47	19.89	20.71	15.92	20.29	29.72	12.8	14.07	25.25	16.27	14.7	22.93	16.34	11.77	17.56	24.72	11.35	17.72	7.84	12.38	29.24	24.02	16.6
1827	RCAN1	57.91	43.27	57.57	142.59	53.29	88.57	178.75	47.07	98.78	55.42	54.77	266.78	490.38	53.1	89.35	95.63	163.22	85.77	208.72	169.87	66.18	194.15	327.81	283.18	254.09	69.74	154.82	74.72	54.25	156.76	51.53	51.13	196.91	72.58	478.68	74.15	173.85	53.21	531.39	565.58	218.02	344.64	49.38	79.94	247.94	76.53	427.98	153.78
63036	CELA2A	0	0	0	0	0	0	0	0	0	0	0.54	0.77	0	0	0	0.6	0	0	0	0.49	0	0	0	0	0	0	0	0	0	0	0	0	0	0	0.54	0	0	0	0	1.06	0	0	0	0	0	0	2.12	1.09
5893	RAD52	20.9	24.75	16.52	21.02	11.48	11.35	19.57	15.37	26.37	27.89	19.87	21.47	21.74	22.73	28.36	13.91	22.62	16.57	19.73	16.25	28.18	21.84	20.59	31.81	17.81	31.27	36.55	26.85	21.79	26.47	36.18	23.2	19.2	71.4	20.6	13.91	19	25.7	16.77	21.89	34.32	13.62	34.99	17.42	16.72	27.2	24.82	23.94
7812	CSDE1	297.81	171.62	266.75	250.58	265.87	259.38	555.38	397.53	246.06	207.53	197.34	351.27	408.66	129.87	375.75	234.41	212.2	232.5	692.87	409.35	153	297.49	458.93	203.95	673.56	202.86	585.35	163.28	213.67	524.48	213.11	187.07	570.16	221.07	304.21	228.74	230.35	232.77	577.61	495.01	367.68	594.37	221.4	228.57	266.35	255.64	449.37	284
112942	CFAP36	24.54	19.36	22.15	33.15	18.7	33.75	40.62	19.34	21.4	29.44	21.83	36.67	29.61	18.73	24.93	19.9	31.52	18.31	34.54	34.92	20.3	28.58	45.37	28.26	39.78	25.86	30.29	27.55	16.33	41.81	26.94	22.41	36.11	49.46	21.32	16.52	19.19	27.89	35.02	41.44	33.42	35.19	22.78	11.01	32.88	41.13	33.92	15.28
126637	TCHHL1	0	0	0	0.28	0	0.14	0	0	0.27	0.35	0.13	0	0.32	1.56	0	0	0	0.45	0	0	0	0.51	0	0	0	0	0	0.63	0	0	0	0.11	0.13	0	0.13	0.34	0	0.3	0	0	0	0	0	0	0	0	0.17	0.4
8687	KRT38	1.17	1.22	0.37	0.57	0.97	0.18	0	0	0	0	3.81	0	0	0	1.85	0	0.57	0	0	0	0	0.23	0	0	0	0.33	0	0.63	3.37	0.22	0.23	0.31	1.72	0.53	7.65	0	2.35	0	0	0	3.19	0	0.52	0	0	0	0.23	0
49860	CRNN	2008.81	15.72	2182.15	159.45	2311.77	0.79	4.14	0.87	1.54	0.45	1329.09	57.15	4.86	0	1159.22	0.85	48.95	21.97	1.32	0	109.11	1.64	1.83	0.34	1.88	0	0.31	8.12	2580.06	4.82	1.32	40.18	1347.24	49.67	1083.48	1.32	2274.48	2.01	1.59	0.33	72.1	1.39	2202.4	2.53	35.59	0.32	1.98	684.01
115557	ARHGEF25	59.72	18.79	40.9	72.74	30.73	33.04	152.96	24.58	36.48	29.88	24.58	103.37	123.14	25.51	82.71	32.25	27.98	30.52	190.1	75.87	15.68	51.92	191.34	40.38	150.2	25.96	158.2	19.15	16.46	159.92	6.83	10.44	96.93	64.37	52.43	9.08	38.88	14.01	191.84	142.12	131.95	125.28	21.54	14.34	68.51	15.23	133.09	26.4
56967	C14orf132	34.36	26.97	18.29	30.32	19.71	28.68	41.41	12.83	18.86	12.81	23.18	30.79	43.6	9.46	30.12	22.99	25.32	17.65	52.5	27.06	15.09	27.51	51.83	37.48	32.64	18.09	55.8	16.33	27.27	51.36	14.4	7.78	43.88	50.89	21.66	12.44	25.6	20.25	41.01	40.07	48.32	34.45	20.65	10.49	23.52	14.93	52.61	16.74
163486	DENND1B	58.82	73.76	59.53	38.01	64.27	59.06	42.41	65.61	102.62	126.29	72.46	37.89	30.29	76.7	50.69	56.26	64.93	71.18	45.93	51.6	75.46	61.5	43.88	46.79	39.27	40.36	39.43	49.45	57.47	42.06	57.01	67	48.19	63.59	45.72	56.5	51.17	51.87	48.44	39.43	37.48	40.22	52.25	46.21	43.88	57.68	27.59	60.41
23742	NPAP1	8.75	12.01	8.25	9.28	8.37	11.41	5.64	7.52	9.65	7.88	11.11	12.92	12.76	7.9	12.54	13.23	14.85	13.23	7.27	8.86	13.2	14.03	13.34	15.9	5.8	16.96	12.2	17.22	10.72	13.39	21.43	8.35	8.22	17.39	9.19	8.93	12.41	10.91	5.1	7.97	12.52	6.57	9.62	4.75	7.71	16.14	17.2	8.44
5730	PTGDS	218.79	141.53	510.93	54.11	199.33	39.51	117.74	19.04	227.82	50.83	237.84	72.45	91.45	24.49	167.4	24.68	485.08	162.82	137.36	352.15	204.21	97.12	107.46	481.8	64.38	11.47	71.75	70.85	280.43	100.68	656.34	11.6	106.88	16.19	41.97	11.2	157.1	26.48	234.18	98.37	79.03	24.25	98.3	11.04	358.03	12.5	29.65	17.2
93343	MVB12A	51.61	61.97	56.25	65.63	56.95	58.83	36.87	58.31	39.5	50.66	60.61	31.84	34.37	67.26	42.37	35.86	45.53	43.78	35.31	57.98	52.42	52.24	33.75	35.82	35.42	48.43	35.65	87.68	59.37	31.06	38.63	48.5	32.98	44.74	41.98	55.32	32.49	51.99	26.25	31.5	26.58	29.03	51.37	64.34	43.56	49.89	27.25	51.3
387103	CENPW	6.03	9.55	8.87	9.85	14.2	83.93	6.78	31.46	20.72	16.99	13.82	6.89	4.66	25.75	6.44	24.09	10.41	3.48	3.22	8.94	10.86	29.25	5.51	4.43	3.43	16.66	3.07	17.65	4.88	7.05	4.82	53.33	1.26	12.28	11.2	24.25	7.53	19.68	7.82	4.34	10.31	8.53	6.28	24.63	10.64	15.79	15.44	29.17
10634	GAS2L1	46.12	61.47	34.49	75.49	49.02	67.76	45.28	52.81	73.22	129.66	59.33	47.49	39.48	58.18	45.03	55.21	60.04	54.09	53.79	47.98	102.02	66.76	37.85	38.23	50.14	119.63	43.89	45.4	44.88	42.3	9.06	59.78	34.11	21.64	39.13	70.46	35.17	37.09	33.93	42.65	65.06	51.8	46.64	55.93	31.92	89.98	50.11	64.27
645432	ARRDC5	7.84	13.05	14.6	5.2	4.72	4.5	1.34	4.83	18.26	3.53	5.73	6.18	3.38	1.85	7.28	9.85	17.67	20.94	6.3	15.99	8.19	7.41	8.26	26.32	2.93	6.5	5.22	8.47	8.94	8.57	44.43	4.42	3.83	4.78	4.05	4.57	9.4	6.34	4.17	3.91	3.58	1.72	6.04	1.82	6.02	5.94	4.61	2.31
8728	ADAM19	32.63	37.2	37.49	95.92	26.44	67.42	51.7	29.43	48.32	41.42	28.72	51.01	59.16	31.77	38.34	66.3	52.31	66.33	48.1	71.47	44.17	48.09	62.77	67.15	60.62	38.84	53.97	21.49	17.14	49.81	139.17	15.2	35.28	26.22	29.29	49.31	35.78	32.36	48.69	62.43	48.16	44.89	18.81	30.72	31.89	9.36	63.69	20.04
100289187	TMEM225B	27.1	31.53	18.91	33.17	20.82	33.74	20.6	23.73	29.78	23.04	33.29	43.6	34.13	21.93	37.65	33.72	50.71	30.26	18.72	23.24	40.6	38.82	34.42	42.13	21.09	57.54	39.33	39.33	34.79	39.77	45.27	22.38	23.45	36.65	33.27	24.41	37.61	32.39	22.67	34.24	43.19	24.38	29.2	24.88	24.5	47.14	42.13	28.88
388327	C17orf100	7.01	8.74	5.71	5.83	5.96	5.25	1.79	6.3	9.7	10.4	5.16	4.53	1.01	13.12	5.7	5.34	5.12	7.3	2.69	1.53	6.67	4.01	1.36	5.6	5.74	13.89	2.1	13.31	8.34	3.09	6.24	8.46	2.88	19.29	14.98	8.06	19.38	25.53	2.83	1.1	2.13	1.82	6.2	7.86	2.4	13.26	1.47	11.25
391002	PRAMEF8	0	0	0	0	0.25	0	0	0	0	0	0	0	0	0	0	0	0.81	0	0	0	0.89	0.2	0	0	0	0	0	0	0	0	0	0	0	0	0	0	0	0	0	0	0	0	0	0	0	0	0	0
1173	AP2M1	231.67	430.02	253.2	367.7	251.83	976.1	330.48	502.02	415.32	721.53	280.5	298.94	292.98	893.23	253.44	384.08	198.84	451.21	340.74	418.86	358.7	464.17	253.96	209.35	310.85	363.27	305.75	297.79	209.83	297.8	168.28	510.11	242.62	327.84	223.93	643.88	136.19	302.57	319.16	254.46	206.64	316.8	163.96	576.68	210.64	228.3	256.88	369.33
23369	PUM2	94.1	105.9	86.61	70.56	84.62	110.79	90.94	124.1	108.61	100.37	87.38	104.59	93.41	67.76	97.63	72.08	125.04	86.97	107.96	108.29	94.81	108.92	100.03	81.92	109.54	103.15	106.41	101.17	86.53	111.79	126.13	81.15	118.46	164.65	111.23	83.47	86.43	94.62	120.49	91.69	101.4	103.54	82.59	65.38	79.17	139.03	83.75	83.1
148789	B3GALNT2	68.22	78.99	53.61	77.23	59.92	74.61	62.98	70.02	63.96	65.79	75.82	83.85	89.46	49.8	81.74	65.83	108.07	69.6	80.01	60.04	98.59	93.57	101.83	80.76	67.85	111.42	99.72	90.17	70.2	107.18	89.41	63.77	83.92	102.07	83.83	72.26	86.02	97.69	67.1	70.63	104.84	65.07	65.63	54.89	53.35	117.96	87.1	75.56
[truncated: 18,133 more rows]
[truncated: 69 more columns]

## Sheet: Proteomics
Protein accession	Gene name	S035T	S035P	S037T	S037P	S039T	S039P	S042T	S042P	S043T	S043P	S046T	S046P	S048T	S048P	S051T	S051P	S054T	S054P	S057T	S057P	S059T	S059P	S068T	S068P	S074T	S074P	S075T	S075P	S083T	S083P	S086T	S086P	S087T	S087P	S088T	S088P	S091T	S091P	S092T	S092P	S098T	S098P	S102T	S102P	S107T	S107P	S108T	S108P
[truncated: 8,224 more rows]
[truncated: 72 more columns]

[truncated: 6 more sheets: Phosphoproteomics, DF proteins(up), DF proteins(down), DF phosphoproteins(up), DF phosphoproteins(down), ESTIMATE]
